# Supplementary material for: Hydroazidation of trifluoromethyl alkenes with trimethylsilyl azide enabled by organic photoredox catalysis
Source: Royal Society of Chemistry journal article supplement (doi:10.1039/d4cc02503b), 2024-01-01

# Supporting Information

## Hydroazidation of trifluoromethyl alkenes with trimethylsilyl azide enabled by organic photoredox catalysis

Yutao Shi,<sup>a</sup> Yuliang Zhang,<sup>a</sup> Xiaochen Ji<sup>\*a,b</sup> and Huawen Huang<sup>a,b</sup>

<sup>a</sup> Key Laboratory for Green Organic Synthesis and Application of Hunan Province, Key Laboratory of Environmentally Friendly Chemistry and Application of Ministry of Education, College of Chemistry, Xiangtan University, Xiangtan 411105, China.

<sup>b</sup> School of Chemistry and Chemical Engineering, Henan Normal University, Xinxiang, 453007, China

E-mail: xcji@xtu.edu.cn

### List of contents

|                                                                                 |           |
|---------------------------------------------------------------------------------|-----------|
| <b>1. General information</b> .....                                             | <b>2</b>  |
| <b>2. Synthesis and characterization of substrates.</b> .....                   | <b>3</b>  |
| <b>3. Optimization of the reaction conditions and control experiments</b> ..... | <b>10</b> |
| <b>4. General procedures</b> .....                                              | <b>13</b> |
| 4.1 Reaction for the synthesis of <b>3</b> .....                                | <b>13</b> |
| 4.2 Scale-up reaction for the synthesis of <b>3</b> .....                       | <b>14</b> |
| <b>5. Mechanistic investigations</b> .....                                      | <b>15</b> |
| 5.1 Free radical capture experiments .....                                      | <b>15</b> |
| 5.2. Deuterium-labelling experiments .....                                      | <b>16</b> |
| 5.3. Radical clock experiment. ....                                             | <b>18</b> |
| 5.4. Photo-irradiation on and off experiments. ....                             | <b>21</b> |
| 5.5. Quantum yield determination .....                                          | <b>21</b> |
| 5.6. Stern-Volmer fluorescence quenching experiments .....                      | <b>24</b> |
| <b>6. Selective transformations of hydroazidation product <b>3</b></b> .....    | <b>25</b> |
| <b>7. Characterization data of products</b> .....                               | <b>27</b> |
| <b>8. References</b> .....                                                      | <b>39</b> |
| <b>9. NMR spectra</b> .....                                                     | <b>40</b> |

## 1. General information

Reactions via general procedure were carried out under an Ar atmosphere unless otherwise noted. Column chromatography was performed using silica gel (200-300 mesh).  $^1\text{H}$  NMR and  $^{13}\text{C}$  NMR spectra were recorded on Bruker-AV (400 and 101 MHz, respectively) instrument using  $\text{CDCl}_3$  as solvent, Chemical shifts are given in ppm and coupling constants in 400Hz.  $^1\text{H}$  spectra and  $^{13}\text{C}$  spectra were calibrated in relation to the reference measurement of  $\text{CDCl}_3$  (7.260 ppm) and  $\text{CDCl}_3$  (77.00 ppm), respectively. In order to indicate the signal multiplicity, the following abbreviations were used: s (singlet), d (doublet), t (triplet), q (quartet) and m (multiplet) as well as combinations of them. Mass spectra were measured on Agilent 5975 GC-MS instrument (EI). High-resolution mass spectra (ESI) were obtained with the Thermo Scientific LTQ Orbitrap XL mass spectrometer. Melting points were measured with a YUHUA X-5 melting point instrument and were uncorrected.

## 2. Synthesis and characterization of substrates.

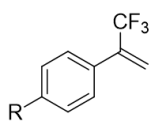

- 1a**, R = Ph, 79%  
**1b**, R = OMe, 52%  
**1d**, R = OPh, 67%  
**1e**, R = SMe, 75%  
**1f**, R = Ac, 60%  
**1g**, R = NO<sub>2</sub>, 43%

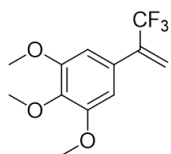

**1c**, 70%

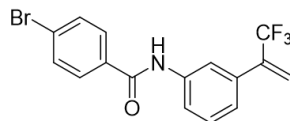

**1h**, 72%

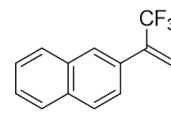

**1i**, 42%

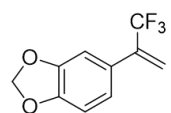

**1j**, 64%

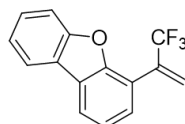

**1k**, 55%

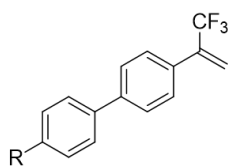

- 1l**, R = OMe, 84%  
**1o**, R = <sup>t</sup>Bu, 56%  
**1r**, R = F, 65%  
**1s**, R = Br, 56%  
**1t**, R = CF<sub>3</sub>, 72%  
**1u**, R = COOMe, 66%  
**1v**, R = CN, 78%

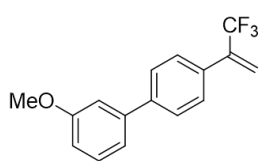

**1m**, 72%

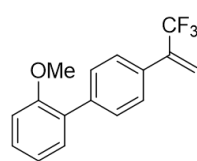

**1n**, 70%

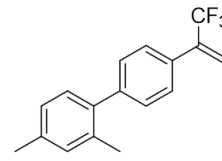

**1p**, 72%

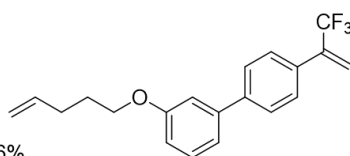

**1q**, 62%

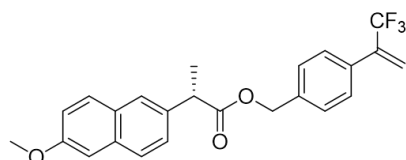

**1w**, 68%

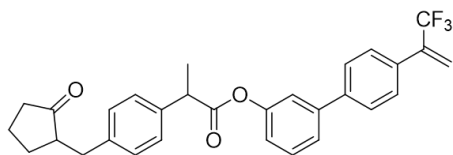

**1x**, 45%

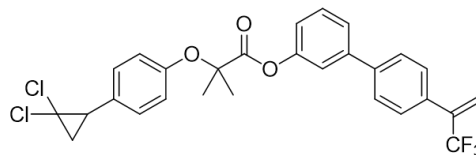

**1y**, 46%

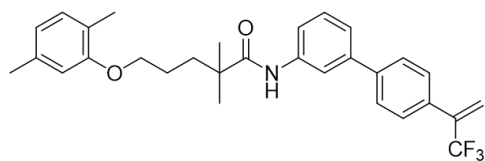

**1z**, 45%

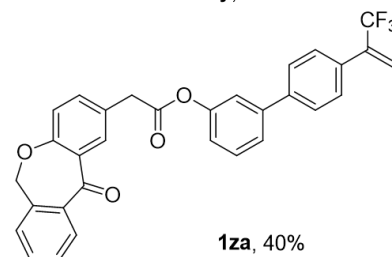

**1za**, 40%

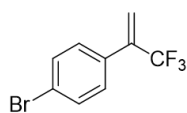

**M1**, 50%

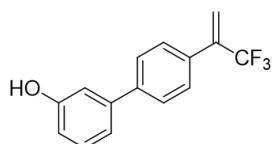

**M2**, 70%

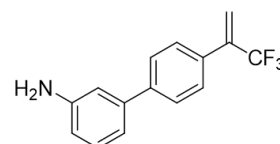

**M3**, 68%

### Procedure A for preparation of trifluoromethyl alkenes (1a-1g, 1i-1k and M1)<sup>1</sup>

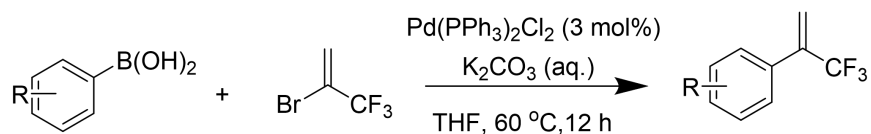

**Procedure A:** To a Schlenk tube equipped with a magnetic stir bar were added aqueous K<sub>2</sub>CO<sub>3</sub> (2.00 M, 8 mL), THF (12 mL), arylboronic acid (4.00 mmol), 2-bromo-3,3,3-trifluoropropene (1391.4 mg, 2.0 equiv, 8.00 mmol) and Pd(PPh<sub>3</sub>)<sub>2</sub>Cl<sub>2</sub> (3 mol%, 84.2 mg, 0.12 mmol). The resulting solution was stirred at 60 °C with oil bath for 12 h. After the reaction mixture was cooled to room temperature, the reaction mixture was quenched with saturated aqueous NH<sub>4</sub>Cl, and extracted with EtOAc (3 x 20 mL). The combined organic layers were dried (Na<sub>2</sub>SO<sub>4</sub>) and the solvent was removed under reduced pressure. The resultant crude product material was purified by flash chromatography using the appropriate gradient of petroleum ether and ethyl acetate.

### Procedure B for preparation of trifluoromethyl alkenes (11-1v, M2 and M3)<sup>2</sup>

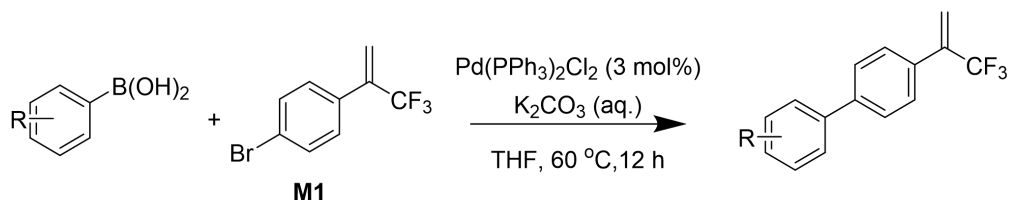

**Procedure B:** To a Schlenk tube equipped with a magnetic stir bar were added aqueous K<sub>2</sub>CO<sub>3</sub> (2.00 M, 8 mL), THF (12 mL), arylboronic acid (4.00 mmol), 1-bromo-4-(3,3,3-trifluoroprop-1-en-2-yl)benzene (999.8 mg, 1.0 equiv, 4.00 mmol) and Pd(PPh<sub>3</sub>)<sub>2</sub>Cl<sub>2</sub> (3 mol%, 84.2 mg, 0.12 mmol). The resulting solution was stirred at 60 °C with oil bath for 12 h. After the reaction mixture was cooled to room temperature, the reaction mixture was quenched with saturated aqueous NH<sub>4</sub>Cl, and extracted with EtOAc (3 x 20 mL). The combined organic layers were dried (Na<sub>2</sub>SO<sub>4</sub>) and the solvent was removed under reduced pressure. The resultant crude product material was purified by flash chromatography using the appropriate gradient of petroleum ether and ethyl acetate.

### 4-methoxy-4'-(3,3,3-trifluoroprop-1-en-2-yl)-1,1'-biphenyl (11)

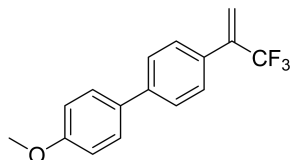

Prepared according to standard conditions. Purification by thin layer chromatography was performed (PE/EA: 150/1) to yield **11** (934.1 mg, 84%) as a white solid, mp: 107 - 111 °C

<sup>1</sup>H NMR (400 MHz, Chloroform-*d*) δ 7.50 – 7.42 (m, 6H), 6.91 – 6.89 (m, 2H), 5.88 (s, 1H), 5.73 (s, 1H), 3.76 (s, 3H).

<sup>13</sup>C NMR (101 MHz, Chloroform-*d*) δ 159.5, 141.4, 138.5 (q, *J* = 29.8 Hz), 132.7, 131.8, 128.1, 127.7, 126.7, 123.4 (q, *J* = 274.1 Hz), 119.9 (q, *J* = 5.8 Hz), 114.3, 55.3.

<sup>19</sup>F NMR (376 MHz, Chloroform-*d*) δ -64.56.

HRMS (APCI) *m/z*: [M]<sup>+</sup> calcd for C<sub>16</sub>H<sub>13</sub>F<sub>3</sub>O<sup>+</sup> 278.0913; found 278.0911.

### 3-methoxy-4'-(3,3,3-trifluoroprop-1-en-2-yl)-1,1'-biphenyl (**1m**)

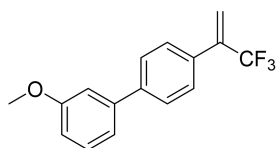

Prepared according to standard conditions. Purification by thin layer chromatography was performed (PE/EA: 150/1) to yield **1m** (778.4 mg, 70%) as a colorless liquid.

$^1\text{H}$  NMR (400 MHz, Chloroform-*d*)  $\delta$  7.61 – 7.59 (m, 2H), 7.53 – 7.51 (m, 2H), 7.36 (t,  $J = 7.9$  Hz, 1H), 7.18 (d,  $J = 8.1$  Hz, 1H), 7.13 – 7.12 (m, 1H), 6.91 (dd,  $J = 8.2, 2.5$  Hz, 1H), 5.96 (s, 1H), 5.81 (s, 1H), 3.85 (s, 3H).

$^{13}\text{C}$  NMR (101 MHz, Chloroform-*d*)  $\delta$  156.0, 141.7, 141.7, 138.5 (q,  $J = 30.1$  Hz), 132.6, 129.9, 127.7, 127.3, 123.4 (q,  $J = 274.1$  Hz), 120.2 (q,  $J = 5.8$  Hz), 119.6, 113.0, 112.9, 55.3.

$^{19}\text{F}$  NMR (376 MHz, Chloroform-*d*)  $\delta$  -64.56.

HRMS (APCI)  $m/z$ :  $[\text{M}]^+$  calcd for  $\text{C}_{16}\text{H}_{13}\text{F}_3\text{O}^+$  278.0913; found 278.0910.

### 2-methoxy-4'-(3,3,3-trifluoroprop-1-en-2-yl)-1,1'-biphenyl (**1n**)

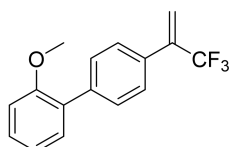

Prepared according to standard conditions. Purification by thin layer chromatography was performed (PE/EA: 150/1) to yield **1n** (800.6 mg, 72%) as a colorless liquid.

$^1\text{H}$  NMR (400 MHz, Chloroform-*d*)  $\delta$  7.56 – 7.54 (m, 2H), 7.50 – 7.48 (m, 2H), 7.34 – 7.30 (m, 2H), 7.04 – 7.02 (m, 1H), 6.98 – 6.96 (m, 1H), 5.94 (s, 1H), 5.80 (s, 1H), 3.79 (s, 3H).

$^{13}\text{C}$  NMR (101 MHz, Chloroform-*d*)  $\delta$  156.4, 139.3, 138.7 (q,  $J = 29.9$  Hz), 132.0, 130.7, 129.7, 129.7, 129.0, 126.9, 123.4 (q,  $J = 274.1$  Hz), 120.9, 120.0 (q,  $J = 5.8$  Hz), 111.2, 55.5.

$^{19}\text{F}$  NMR (376 MHz, Chloroform-*d*)  $\delta$  -64.42.

HRMS (ESI-TOF)  $m/z$ :  $[\text{M}+\text{Na}]^+$  calcd for  $\text{C}_{16}\text{H}_{13}\text{F}_3\text{ONa}^+$  301.0811; found 301.0813.

### 4-(tert-butyl)-4'-(3,3,3-trifluoroprop-1-en-2-yl)-1,1'-biphenyl (**1o**)

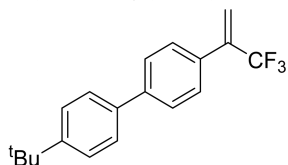

Prepared according to standard conditions. Purification by thin layer chromatography was performed (PE/EA: 250/1) to yield **1o** (681.0 mg, 56%) as a white solid, mp: 68 - 72 °C

$^1\text{H}$  NMR (400 MHz, Chloroform-*d*)  $\delta$  7.61 – 7.59 (m, 2H), 7.55 – 7.51 (m, 4H), 7.48 – 7.46 (m, 2H), 5.95 (s, 1H), 5.81 (s, 1H), 1.36 (s, 9H).

$^{13}\text{C}$  NMR (101 MHz, Chloroform-*d*)  $\delta$  150.8, 141.7, 138.6 (q,  $J = 30.1$  Hz), 137.3, 132.1, 127.7, 127.1, 126.7, 125.8, 123.4 (q,  $J = 274.1$  Hz), 120.0 (q,  $J = 5.7$  Hz), 34.6, 31.3.

$^{19}\text{F}$  NMR (376 MHz, Chloroform-*d*)  $\delta$  -64.52.

HRMS (APCI)  $m/z$ :  $[\text{M}+\text{H}]^+$  calcd for  $\text{C}_{19}\text{H}_{20}\text{F}_3^+$  305.1512; found 305.1509.

### 2,4-dimethyl-4'-(3,3,3-trifluoroprop-1-en-2-yl)-1,1'-biphenyl (**1p**)

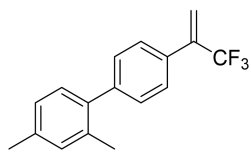

Prepared according to standard conditions. Purification by thin layer chromatography was performed (PE/EA: 150/1) to yield **1p** (794.9 mg, 72%) as a colorless liquid.

$^1\text{H}$  NMR (400 MHz, Chloroform-*d*)  $\delta$  7.51 – 7.49 (m, 2H), 7.34 – 7.32 (m, 2H), 7.14 – 7.06 (m, 3H), 5.96 (s, 1H), 5.83 (s, 1H), 2.36 (s, 3H), 2.26 (s, 3H).

$^{13}\text{C}$  NMR (101 MHz, Chloroform-*d*)  $\delta$  142.7, 138.6 (q,  $J = 29.9$  Hz), 138.2, 137.3, 135.1, 131.8, 131.2, 129.6, 129.5, 127.0, 126.6, 123.4 (q,  $J = 274.0$  Hz), 120.1 (q,  $J = 5.8$  Hz), 21.0, 20.4.

$^{19}\text{F}$  NMR (376 MHz, Chloroform-*d*)  $\delta$  -64.53.

HRMS (APCI)  $m/z$ :  $[\text{M}]^+$  calcd for  $\text{C}_{17}\text{H}_{15}\text{F}_3^+$  276.1120; found 276.1117.

### 4'-(3,3,3-trifluoroprop-1-en-2-yl)-[1,1'-biphenyl]-3-ol (**M2**)

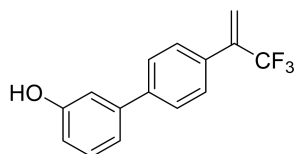

Prepared according to standard conditions. Purification by thin layer chromatography was performed (PE/EA: 8/1) to yield **M2** (739.2 mg, 70%) as a white solid, mp: 63 - 67 °C

$^1\text{H}$  NMR (400 MHz, Chloroform-*d*)  $\delta$  7.58 – 7.50 (m, 4H), 7.33 – 7.29 (m, 1H), 7.18 – 7.16 (m, 1H), 7.07 (s, 1H), 6.84 (dd,  $J = 8.0, 2.4$  Hz, 1H), 5.97 (s, 1H), 5.81 (s, 1H), 5.18 (s, 0.87H).

$^{13}\text{C}$  NMR (101 MHz, Chloroform-*d*)  $\delta$  155.8, 142.0, 141.2, 138.4 (q,  $J = 30.1$  Hz), 132.6, 130.1, 127.7, 127.2, 123.3 (q,  $J = 274.1$  Hz), 120.3 (q,  $J = 5.8$  Hz), 119.7, 114.6, 114.0.

$^{19}\text{F}$  NMR (376 MHz, Chloroform-*d*)  $\delta$  -64.57.

HRMS (APCI)  $m/z$ :  $[\text{M}-\text{H}]^-$  calcd for  $\text{C}_{15}\text{H}_{10}\text{F}_3\text{O}^-$  263.0689; found 263.0685.

### 4'-(3,3,3-trifluoroprop-1-en-2-yl)-[1,1'-biphenyl]-3-amine (**M3**)

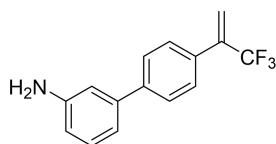

Prepared according to standard conditions. Purification by thin layer chromatography was performed (PE/EA: 5/1) to yield **M3** (715.4 mg, 68%) as a yellow liquid.

$^1\text{H}$  NMR (400 MHz, Chloroform-*d*)  $\delta$  7.57 – 7.54 (m, 2H), 7.50 – 7.48 (m, 2H), 7.23 – 7.19 (m, 1H), 6.99 – 6.97 (m, 1H), 6.87 (s, 1H), 6.68 – 6.65 (m, 1H), 5.94 (s, 1H), 5.79 (s, 1H), 3.60 (s, 2H).

$^{13}\text{C}$  NMR (101 MHz, Chloroform-*d*)  $\delta$  146.8, 141.9, 141.4, 138.5 (q,  $J = 29.8$  Hz), 132.3, 129.8, 127.5, 127.1, 123.4 (q,  $J = 274.1$  Hz), 120.1 (q,  $J = 5.7$  Hz), 117.5, 114.5, 113.7.

$^{19}\text{F}$  NMR (376 MHz, Chloroform-*d*)  $\delta$  -64.48.

HRMS (ESI-TOF)  $m/z$ :  $[\text{M}+\text{H}]^+$  calcd for  $\text{C}_{15}\text{H}_{13}\text{F}_3\text{N}^+$  264.0995; found 264.0996.

### Procedure C for preparation of trifluoromethyl alkenes (**1q**)<sup>3</sup>

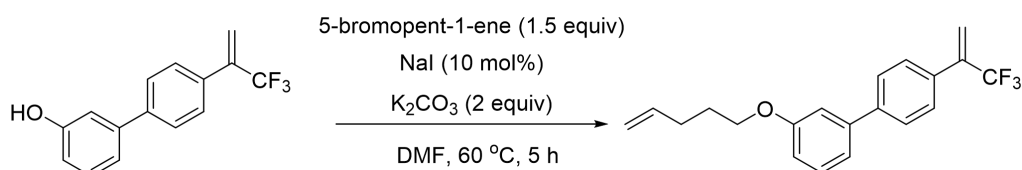

**Procedure C:** A mixture of **M2** (1.056 g, 4.00 mmol, 1.0 equiv), NaI (60.0 mg, 10 mol%) K<sub>2</sub>CO<sub>3</sub> (1.104 g, 8.00 mmol, 2.0 equiv) in DMF (15 mL) was stirred at 60 °C with oil bath for 30 minutes before 5-bromopent-1-ene (0.711 mL, 6.00 mmol, 1.5 equiv) was added. After the reaction mixture was cooled to room temperature, the reaction mixture was quenched with saturated H<sub>2</sub>O, and extracted with EtOAc (3 x 20 mL). The combined organic layers were dried (Na<sub>2</sub>SO<sub>4</sub>) and the solvent was removed under reduced pressure. The resultant crude product material was purified by flash chromatography using the appropriate gradient of petroleum ether and ethyl acetate.

### 3-(pent-4-en-1-yloxy)-4'-(3,3,3-trifluoroprop-1-en-2-yl)-1,1'-biphenyl (**1q**)

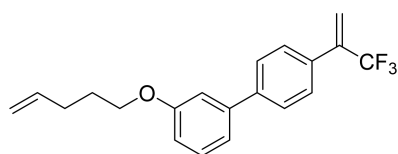

Prepared according to standard conditions. Purification by thin layer chromatography was performed (PE/EA: 50/1) to yield **1q** (823.4 mg, 62%) as a colorless liquid.

<sup>1</sup>H NMR (400 MHz, Chloroform-*d*) δ 7.60 – 7.58 (m, 2H), 7.53 – 7.50 (m, 2H), 7.36 – 7.32 (m, 1H), 7.17 – 7.15 (m, 1H), 7.12 (s, 1H), 6.90 (dd, *J* = 8.2, 2.3 Hz, 1H), 5.96 (s, 1H), 5.91 – 5.83 (m, 1H), 5.81 (s, 1H), 5.09 (m, 1H), 5.05 – 4.99 (m, 1H), 4.03 (t, *J* = 6.4 Hz, 2H), 2.26 (q, *J* = 7.1 Hz, 2H), 1.91 (p, *J* = 6.7 Hz, 2H).

<sup>13</sup>C NMR (101 MHz, Chloroform-*d*) δ 159.5, 141.7, 141.7, 138.5 (q, *J* = 30.2 Hz), 137.8, 132.5, 129.8, 127.7, 127.3, 123.4 (q, *J* = 274.0 Hz), 120.2 (q, *J* = 5.8 Hz), 119.4, 115.2, 113.6, 113.5, 67.2, 30.1, 28.5.

<sup>19</sup>F NMR (376 MHz, Chloroform-*d*) δ -64.64.

HRMS (APCI) *m/z*: [M+H]<sup>+</sup> calcd for C<sub>20</sub>H<sub>20</sub>F<sub>3</sub>O<sup>+</sup> 333.1461; found 333.1455.

### Procedure D for preparation of trifluoromethyl alkenes (**1w**, **1x**, **1y** and **1za**)<sup>4</sup>

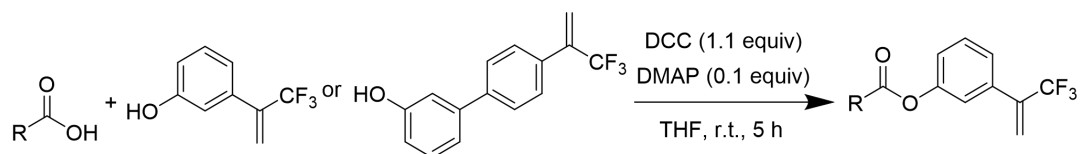

**Procedure D:** To a solution of carboxylic acid (4.50 mmol, 1.0 equiv), 4-dimethylaminopyridine (DMAP) (55.6 mg, 0.45 mmol, 0.1 equiv) and 3-(3,3,3-trifluoroprop-1-en-2-yl)phenol or 4'-(3,3,3-trifluoroprop-1-en-2-yl)-[1,1'-biphenyl]-3-ol (5.00 mmol, 1.1 equiv) in DMF (12 mL), *N,N*-dicyclohexylcarbodiimide (DCC) (1.032 g, 5.00 mmol, 1.1 equiv) was added. The reaction mixture was stirred at room temperature for 5 hours. The reaction mixture was washed with water, and extracted with EtOAc (3 x 20 mL). The combined organic layers were dried (Na<sub>2</sub>SO<sub>4</sub>) and the solvent was removed under reduced pressure. The resultant crude product material was purified by flash chromatography using the appropriate gradient of petroleum ether and ethyl acetate.

**4-(3,3,3-trifluoroprop-1-en-2-yl)benzyl (S)-2-(6-methoxynaphthalen-2-yl)propanoate (1w)**

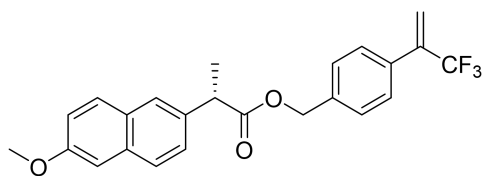

Prepared according to standard conditions. Purification by thin layer chromatography was performed (PE/EA: 6/1) to yield **1w** (1266.8 mg, 68%) as a colorless oil.

$^1\text{H}$  NMR (400 MHz, Chloroform-*d*)  $\delta$  7.69 – 7.62 (m, 3H), 7.40 – 7.37 (m, 1H), 7.34 (d,  $J$  = 8.0 Hz, 2H), 7.21 (d,  $J$  = 8.1 Hz, 2H), 7.14 – 7.09 (m, 2H), 5.91 (s, 1H), 5.70 (s, 1H), 5.10 (d,  $J$  = 3.1 Hz, 2H), 3.93 – 3.87 (m, 4H), 1.59 (d,  $J$  = 7.1 Hz, 3H).

$^{13}\text{C}$  NMR (101 MHz, Chloroform-*d*)  $\delta$  174.3, 157.6, 138.4 (q,  $J$  = 30.2 Hz), 136.8, 135.4, 133.7, 133.2, 129.2, 128.9, 127.9, 127.4, 127.1, 126.2, 125.9, 123.2 (q,  $J$  = 275.1 Hz), 120.5 (q,  $J$  = 5.8 Hz), 119.0, 105.5, 65.7, 55.1, 45.4, 18.4.

$^{19}\text{F}$  NMR (376 MHz, Chloroform-*d*)  $\delta$  -64.66.

HRMS (ESI-TOF)  $m/z$ :  $[\text{M}+\text{Na}]^+$  calcd for  $\text{C}_{24}\text{H}_{21}\text{F}_3\text{O}_3\text{Na}^+$  437.1335; found 437.1348.

**4'-(3,3,3-trifluoroprop-1-en-2-yl)-[1,1'-biphenyl]-3-yl 2-(4-((2-oxocyclopentyl)methyl)phenyl)propanoate (1x)**

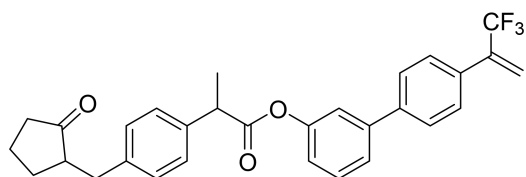

Prepared according to standard conditions. Purification by thin layer chromatography was performed (PE/EA: 6/1) to yield **1x** (996.3 mg, 45%) as a colorless oil.

$^1\text{H}$  NMR (400 MHz, Chloroform-*d*)  $\delta$  7.55 – 7.49 (m, 4H), 7.40 – 7.36 (m, 2H), 7.34 – 7.32 (m, 2H), 7.21 (s, 1H), 7.18 – 7.16 (m, 2H), 7.00 (dt,  $J$  = 6.8, 2.1 Hz, 1H), 5.95 (s, 1H), 5.79 (s, 1H), 3.96 (q,  $J$  = 7.1 Hz, 1H), 3.14 (dd,  $J$  = 13.9, 4.1 Hz, 1H), 2.53 (dd,  $J$  = 13.9, 9.5 Hz, 1H), 2.37 – 2.28 (m, 2H), 2.13 – 2.03 (m, 2H), 1.96 – 1.89 (m, 1H), 1.73 – 1.66 (m, 1H), 1.61 (d,  $J$  = 7.2 Hz, 3H), 1.57 – 1.48 (m, 1H).

$^{13}\text{C}$  NMR (101 MHz, Chloroform-*d*)  $\delta$  172.9, 151.2, 141.6, 140.6, 139.1, 138.2 (q,  $J$  = 30.1 Hz), 137.7, 132.7, 129.6, 129.2, 127.6, 127.5, 127.1, 124.3, 123.2 (d,  $J$  = 274.1 Hz), 120.5, 120.3 (q,  $J$  = 5.7 Hz), 119.9, 50.8, 45.1, 38.0, 35.1, 29.1, 20.4, 18.4.

$^{19}\text{F}$  NMR (376 MHz, Chloroform-*d*)  $\delta$  -64.50.

HRMS (ESI-TOF)  $m/z$ :  $[\text{M}+\text{Na}]^+$  calcd for  $\text{C}_{30}\text{H}_{27}\text{F}_3\text{O}_3\text{Na}^+$  515.1805; found 515.1817.

**4'-(3,3,3-trifluoroprop-1-en-2-yl)-[1,1'-biphenyl]-3-yl 2-(4-(2,2-dichlorocyclopropyl)phenoxy)-2-methylpropanoate (1y)**

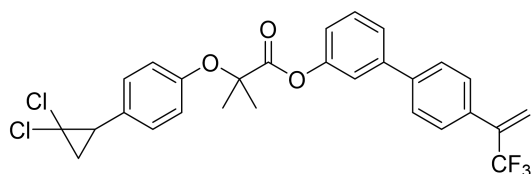

Prepared according to standard conditions. Purification by thin layer chromatography was performed (PE/EA: 8/1) to yield **1y** (1105.4 mg, 46%) as a colorless oil.



$^1\text{H}$  NMR (400 MHz, Chloroform-*d*)  $\delta$  7.51 (s, 4H), 7.43 – 7.36 (m, 2H), 7.17 – 7.14 (m, 3H), 6.97 – 6.95 (m, 3H), 5.95 (s, 1H), 5.79 (s, 1H), 2.84 – 2.79 (m, 1H), 1.91 – 1.87 (m, 1H), 1.77 – 1.73 (m, 7H).

$^{13}\text{C}$  NMR (101 MHz, Chloroform-*d*)  $\delta$  172.8, 154.9, 150.9, 141.8, 140.4, 138.2 (q,  $J = 29.8$  Hz), 132.8, 129.8, 129.8, 128.4, 127.7, 127.2, 124.7, 123.3 (q,  $J = 274.0$  Hz), 120.4 (q,  $J = 5.8$  Hz), 120.4, 119.8, 118.5, 79.2, 60.8, 34.7, 25.7, 25.4 (d,  $J = 3.7$  Hz).

$^{19}\text{F}$  NMR (376 MHz, Chloroform-*d*)  $\delta$  -64.39.

HRMS (ESI-TOF)  $m/z$ :  $[\text{M}+\text{Na}]^+$  calcd for  $\text{C}_{28}\text{H}_{23}\text{Cl}_2\text{F}_3\text{O}_3\text{Na}^+$  557.0869; found 557.0877.

**4'-(3,3,3-trifluoroprop-1-en-2-yl)-[1,1'-biphenyl]-3-yl 2-(11-oxo-6,11-dihydrodibenzo[b,e]oxepin-2-yl)acetate (1za)**

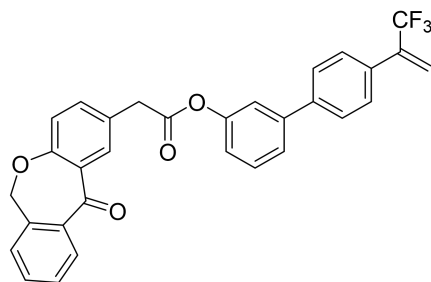

Prepared according to standard conditions. Purification by thin layer chromatography was performed (PE/EA: 6/1) to yield **1za** (925.2 mg, 40%) as a colorless oil.

$^1\text{H}$  NMR (400 MHz, Chloroform-*d*)  $\delta$  8.25 (s, 1H), 7.87 (d,  $J = 7.5$  Hz, 1H), 7.54 – 7.45 (m, 6H), 7.41 – 7.36 (m, 3H), 7.31 (s, 1H), 7.27 (d,  $J = 7.2$  Hz, 1H), 7.07 (d,  $J = 6.8$  Hz, 1H), 7.03 (d,  $J = 8.4$  Hz, 1H), 5.93 (s, 1H), 5.77 (s, 1H), 5.10 (s, 2H), 3.88 (s, 2H).

$^{13}\text{C}$  NMR (101 MHz, Chloroform-*d*)  $\delta$  190.5, 169.7, 160.5, 151.0, 141.5, 140.4, 140.2, 138.1 (q,  $J = 29.9$  Hz), 136.2, 135.4, 132.7, 132.6, 132.5, 129.7, 129.3, 129.1, 127.7, 127.6, 127.1, 127.0, 125.1, 124.4, 123.2 (q,  $J = 273.9$  Hz), 121.1, 120.5, 120.3 (q,  $J = 5.8$  Hz), 119.9, 73.4, 40.0.

$^{19}\text{F}$  NMR (376 MHz, Chloroform-*d*)  $\delta$  -64.37.

HRMS (ESI-TOF)  $m/z$ :  $[\text{M}+\text{Na}]^+$  calcd for  $\text{C}_{31}\text{H}_{21}\text{F}_3\text{O}_4\text{Na}^+$  537.1284; found 537.1294.

**Procedure E for preparation of trifluoromethyl alkenes (1h and 1z)<sup>2</sup>**

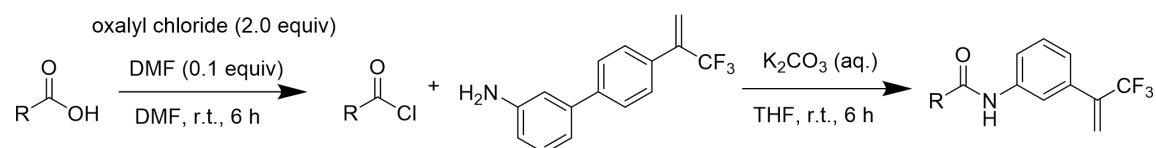

**Procedure E:** To a mixture of carboxylic acid (3.00 mmol, 1.0 equiv) and oxalylchloride (0.51 mL, 6.00 mmol, 2.0 equiv) in dry  $\text{CH}_2\text{Cl}_2$  (12 mL) was added dropwise DMF (23.4  $\mu\text{L}$ , 0.30 mmol, 0.1 equiv). The reaction mixture was stirred at room temperature for 6 h. Removal of the solvent in vacuo afforded the desired acid chloride which was used in the next step without further purification. To a mixture of 3-(3,3,3-trifluoroprop-1-en-2-yl)aniline or 4'-(3,3,3-trifluoroprop-1-en-2-yl)-[1,1'-biphenyl]-3-amine (3.00 mmol, 1.0 equiv) and  $\text{K}_2\text{CO}_3$  (414.6 mg, 3.00 mmol, 1.0 equiv) in dry THF (6 mL) was added dropwise a solution of the freshly prepared acid chloride (3.00 mmol, 1.0 equiv) in dry THF (6 mL). This mixture was stirred at room temperature for 6 hours before water was added to quench the reaction. The resultant mixture was extracted with

EtOAc (3 x 20 mL). The combined organic phases were dried over anhydrous Na<sub>2</sub>SO<sub>4</sub>, filtered, and concentrated under reduced pressure.

**5-(2,5-dimethylphenoxy)-2,2-dimethyl-N-(4'-(3,3,3-trifluoroprop-1-en-2-yl)-[1,1'-biphenyl]-3-yl)pentanamide (1z)**

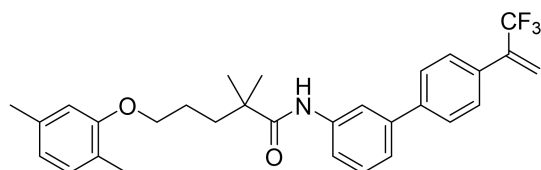

Prepared according to standard conditions. Purification by thin layer chromatography was performed (PE/EA: 6/1) to yield **1z** (668.3 mg, 45%) as a white solid, mp: 89 - 93 °C

<sup>1</sup>H NMR (400 MHz, Chloroform-*d*) δ 7.84 (s, 1H), 7.60 – 7.55 (m, 3H), 7.48 – 7.46 (m, 3H), 7.37 – 7.30 (m, 2H), 6.98 – 6.96 (m, 1H), 6.64 (d, *J* = 7.5 Hz, 1H), 6.59 (s, 1H), 5.94 (s, 1H), 5.78 (s, 1H), 3.90 (s, 2H), 2.26 (s, 3H), 2.16 (s, 3H), 1.82 (s, 4H), 1.33 (s, 6H).

<sup>13</sup>C NMR (101 MHz, Chloroform-*d*) δ 175.9, 156.8, 141.2, 141.0, 138.5, 138.5 (q, *J* = 30.2 Hz), 136.5, 132.5, 130.3, 129.3, 127.6, 127.2, 123.5, 123.3 (q, *J* = 274.1 Hz), 122.8, 120.9, 120.2 (q, *J* = 5.9 Hz), 119.4, 118.9, 112.3, 67.9, 42.8, 37.6, 25.5, 25.1, 21.3, 15.7.

<sup>19</sup>F NMR (376 MHz, Chloroform-*d*) δ -64.49.

HRMS (ESI-TOF) *m/z*: [M+Na]<sup>+</sup> calcd for C<sub>30</sub>H<sub>32</sub>F<sub>3</sub>NO<sub>2</sub>Na<sup>+</sup> 518.2277; found 518.2287.

### 3. Optimization of the reaction conditions and control experiments

**Table S1. Optimization of photocatalyst <sup>a</sup>**

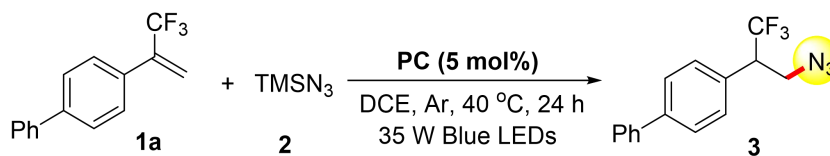

| Entry          | PC                                                                    | Yield (%) <sup>b</sup> |
|----------------|-----------------------------------------------------------------------|------------------------|
| 1              | Eosin Y                                                               | 28                     |
| 2 <sup>c</sup> | Eosin Y                                                               | 52                     |
| 3              | Ir(ppy) <sub>3</sub>                                                  | trace                  |
| 4              | 4CzIPN                                                                | 8                      |
| 5              | Ru(bpy) <sub>3</sub> (PF <sub>6</sub> ) <sub>2</sub>                  | N.R                    |
| 6              | [Ir(dF(CF <sub>3</sub> )ppy) <sub>2</sub> (dtbbpy)](PF <sub>6</sub> ) | trace                  |
| 7              | Rose Bengal                                                           | N.R.                   |
| 8              | 9-Fluorenone                                                          | N.R.                   |

<sup>a</sup> reaction conditions: **1a** (0.20 mmol), **2** (2 equiv), PC (5 mol%), DCE (2 mL), 35 W blue LEDs, Ar, 40 °C, 24 h. N.R. refers to no reaction. <sup>b</sup> Yields of the isolated products were given. <sup>c</sup> reaction 48 h.

**Table S2. Optimization of amount of photocatalyst <sup>a</sup>**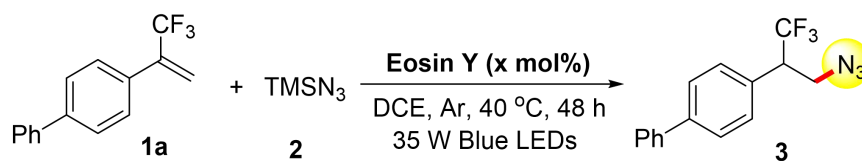

| Entry | Amount (mol%) | Yield (%) <sup>b</sup> |
|-------|---------------|------------------------|
| 1     | 2             | 43                     |
| 2     | 5             | 52                     |
| 3     | 8             | 53                     |
| 4     | 10            | 52                     |

<sup>a</sup> reaction conditions: **1a** (0.20 mmol), **2** (2 equiv), Eosin Y (x mol%), DCE (2 mL), 35 W blue LEDs, Ar, 40 °C, 48 h. <sup>b</sup> Yields of the isolated products were given.

**Table S3. Optimization of solvent <sup>a</sup>.**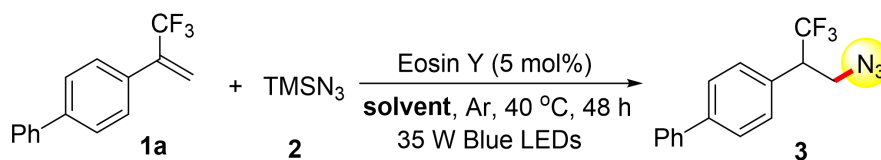

| Entry | Solvent            | Yield (%) <sup>b</sup> |
|-------|--------------------|------------------------|
| 1     | DCE                | 52                     |
| 2     | DCE (1 mL)         | 61                     |
| 3     | DCE (0.5 mL)       | 40                     |
| 4     | CH <sub>3</sub> CN | N.R.                   |
| 5     | Acetone            | N.R.                   |
| 6     | THF                | N.D.                   |
| 7     | PhCl               | 50                     |
| 8     | benzene            | 22                     |
| 9     | Et <sub>2</sub> O  | trace                  |
| 10    | DMF                | trace                  |
| 11    | DMSO               | trace                  |
| 12    | 1,4-Dioxane        | trace                  |

<sup>a</sup> reaction conditions: **1a** (0.20 mmol), **2** (2 equiv), Eosin Y (5 mol%), solvent (2 mL), 35 W blue LEDs, Ar, 40 °C, 48 h. N.R. refers to no reaction. N.D. refers to not detected. <sup>b</sup> Yields of the isolated products were given. PhCl= Chlorobenzene, CH<sub>3</sub>CN= Acetonitrile, DCE= 1,2-Dichloroethane, THF= Tetrahydrofuran.

**Table S4. Optimization of the azide sources <sup>a</sup>**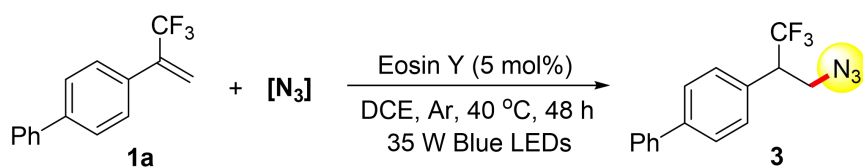

| Entry | Azide sources               | Yield (%) <sup>b</sup> |
|-------|-----------------------------|------------------------|
| 1     | TsN <sub>3</sub>            | 0                      |
| 2     | Azidobenziodoxolone (ABX)   | 9                      |
| 3     | TMSN <sub>3</sub> (2 equiv) | 61                     |
| 4     | TMSN <sub>3</sub> (3 equiv) | 68                     |
| 5     | TMSN <sub>3</sub> (4 equiv) | 69                     |

<sup>a</sup> reaction conditions: **1a** (0.20 mmol), **azide source** (x equiv), Eosin Y (5 mol%), DCE (1 mL), 35 W blue LEDs, Ar, 40 °C, 48 h. <sup>b</sup> Yields of the isolated products were given.

**Table S5. Optimization of the light source <sup>a</sup>**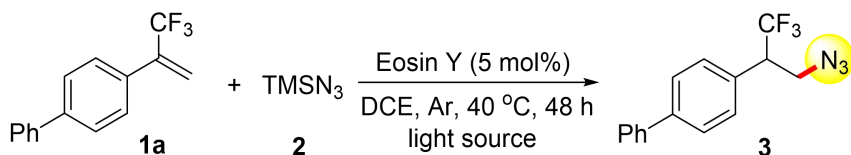

| Entry | Light source     | Yield (%) <sup>b</sup> |
|-------|------------------|------------------------|
| 1     | 35 W blue LEDs   | 68                     |
| 2     | 35 W white LEDs  | 53                     |
| 3     | 35 W purple LEDs | 21                     |
| 4     | 35 W yellow LEDs | 16                     |
| 5     | 35 W red LEDs    | 0                      |

<sup>a</sup> reaction conditions: **1a** (0.20 mmol), **2** (3 equiv), Eosin Y (5 mol%), DCE (1 mL), light source, Ar, 40 °C, 48 h. <sup>b</sup> Yields of the isolated products were given.

**Table S6. Optimization of the temperature <sup>a</sup>**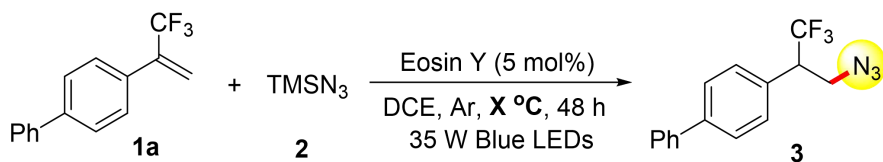

| Entry | Temperature (°C) | Yield (%) <sup>b</sup> |
|-------|------------------|------------------------|
| 1     | 30               | 66                     |
| 2     | 40               | 68                     |
| 3     | 50               | 64                     |

|                |    |    |
|----------------|----|----|
| 4              | 70 | 50 |
| 5 <sup>c</sup> | 40 | 74 |

<sup>a</sup> reaction conditions: **1a** (0.20 mmol), **2** (3 equiv), Eosin Y (5 mol%), DCE (1 mL), 35 W blue LEDs, Ar, X °C, 48 h. <sup>b</sup> Yields of the isolated products were given. <sup>c</sup> 72 h.

**Table S7. Controlled experiment <sup>a</sup>**

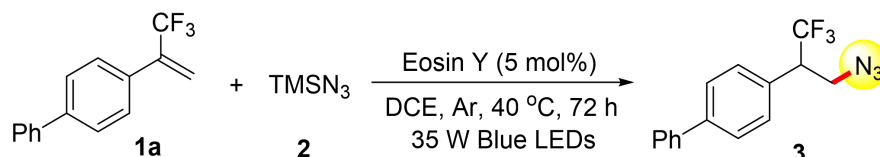

| Entry | Variation from standard conditions           | Yield (%) <sup>b</sup> |
|-------|----------------------------------------------|------------------------|
| 1     | none                                         | 74                     |
| 2     | No PC or no light                            | N.R                    |
| 3     | air                                          | 50                     |
| 4     | Anhydrous DCE and H <sub>2</sub> O (5 equiv) | 72                     |

<sup>a</sup> Standard conditions: **1a** (0.20 mmol), **2** (3 equiv), Eosin Y (5 mol%), DCE (1 mL), 35 W blue LEDs, Ar, 40 °C, 72 h. <sup>b</sup> Yields of the isolated products were given.

## 4. General procedures

### 4.1 Reaction for the synthesis of **3**

**General procedure:** 4-(3,3,3-trifluoroprop-1-en-2-yl)-1,1'-biphenyl (49.6 mg, 0.20 mmol), TMSN<sub>3</sub> (69.1 mg, 3.0 equiv), Eosin Y (6.5 mg, 5 mol%) and DCE (1 mL) were added into a 10 mL tube successively. The tube was charged with argon, which repeated three times. The reaction mixture was stirred at 40 °C under the irradiation by 35 W Blue LEDs for 72 h. The reaction was monitored by TLC. The crude reaction mixture was quenched with saturated sodium carbonate and extracted with EtOAc (3 x 20 mL). The extracts were combined, dried over sodium sulfate, filtered, and the volatiles were removed under reduced pressure. Column chromatography was performed using silica gel (200-300 mesh) or thin layer chromatography was performed using silica gel (GF254) to give product **3**.

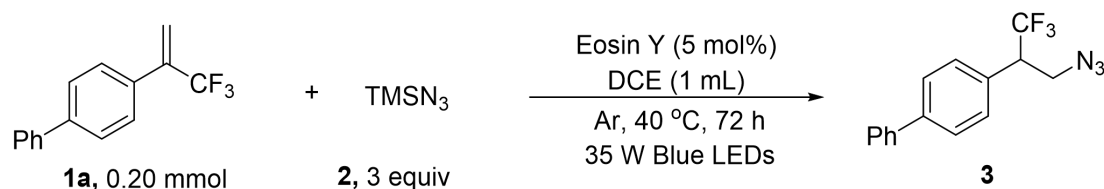

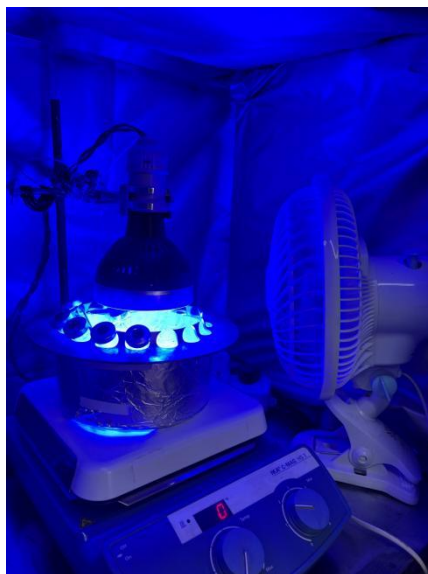

A commercially available 35W (HIPAR30) blue LED lamp was used as the light source, and the reaction setup was provided as the figure above. The sample was about 4 cm from the lamp under ambient temperature with the equipment of a fan.

#### 4.2 Scale-up reaction for the synthesis of **3**

4-(3,3,3-trifluoroprop-1-en-2-yl)-1,1'-biphenyl (4.00 mmol, 0.992 g), TMSN<sub>3</sub> (1.382 g, 3.0 equiv), Eosin Y (5 mol%, 129.6 mg) and DCE (20 mL) were added into a 100 mL reaction vessel successively. The vessel was charged with argon, which repeated three times. The reaction mixture was stirred at 40 °C under the irradiation by 2 x 35 W Blue LEDs for 96 h. The reaction was monitored by TLC. After completion, the solvent was evaporated under vacuum, and the crude product was purified using Column chromatography on silica gel (200-300 mesh) to obtain product **3** in 73% yield (0.853 g).

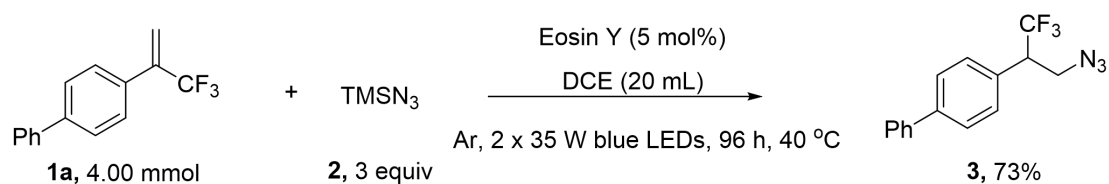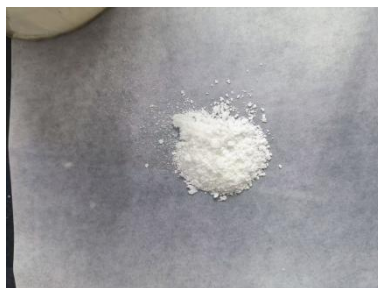

Limitations of the scope:

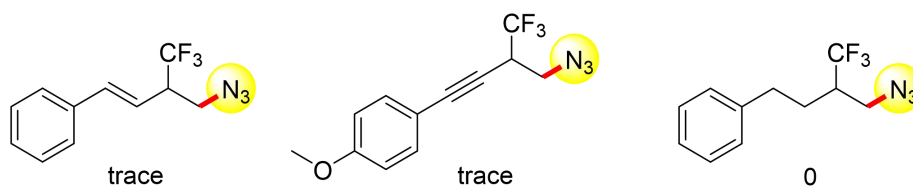

## 5. Mechanistic investigations

### 5.1 Free radical capture experiments

The following reaction was carried out under general procedure: 4-(3,3,3-trifluoroprop-1-en-2-yl)-1,1'-biphenyl (49.6 mg, 0.20 mmol), TMSN<sub>3</sub> (69.1 mg, 3.0 equiv), Eosin Y (6.5 mg, 5 mol%) and DCE (1 mL), and radical inhibitor TEMPO (93.8 mg, 3.0 equiv), BHT (132.2 mg, 3.0 equiv) or 1,1-diphenylethene (108.2 mg, 3.0 equiv) were added into a 10 mL tube successively. The tube was charged with argon, which repeated three times. The reaction mixture was stirred at 40 °C under the irradiation by 35 W Blue LEDs for 72 h. After completion, product **3** was not detected, and (2-azidoethene-1,1-diyl)dibenzene (**M4**) was detected by HRMS (positive mode ESI).

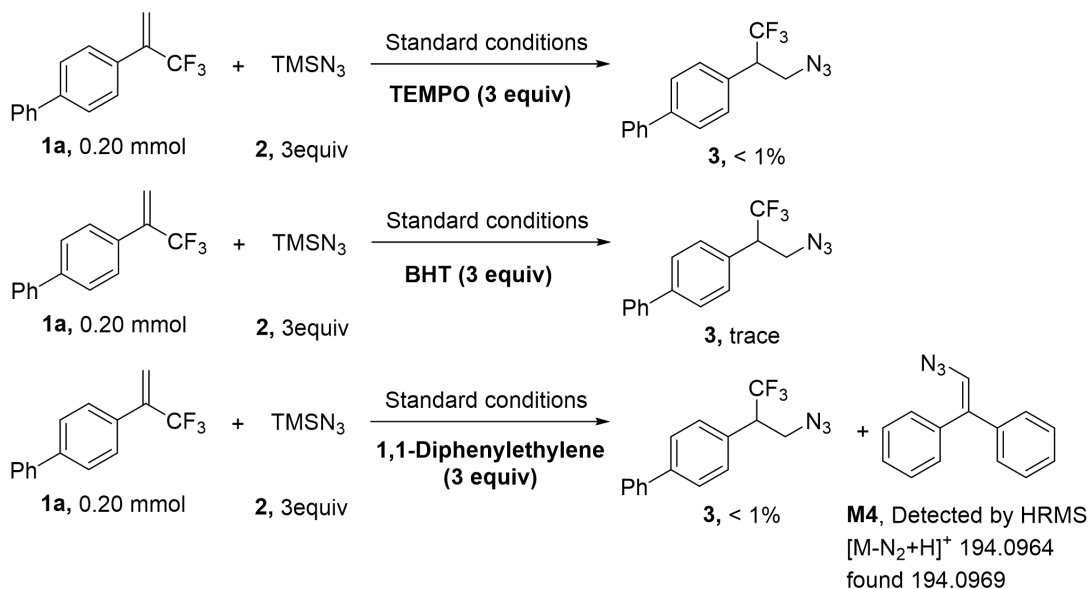

### Sample Chromatograms

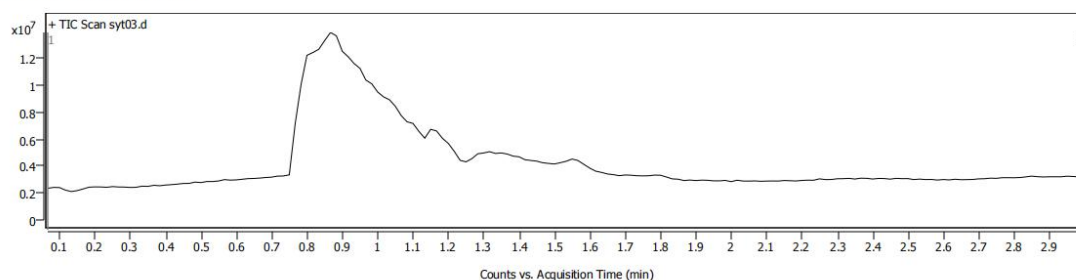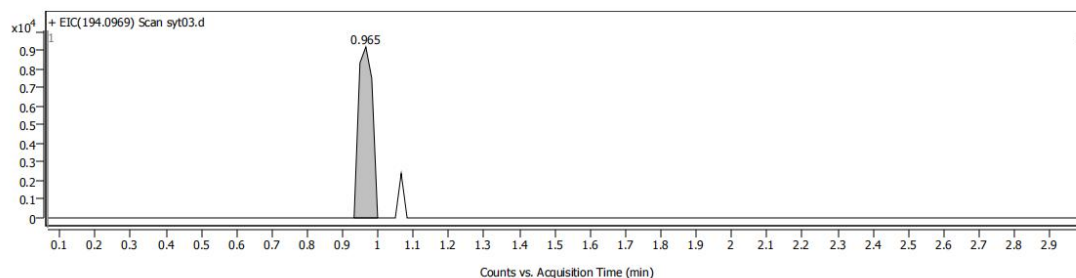

#### Chromatogram Peaks

| Peak | Start | RT    | End   | Height | Area  | Area % | SNR |
|------|-------|-------|-------|--------|-------|--------|-----|
| 1    | 0.932 | 0.965 | 0.999 | 9185   | 25008 | 100.00 |     |

### Sample Spectra

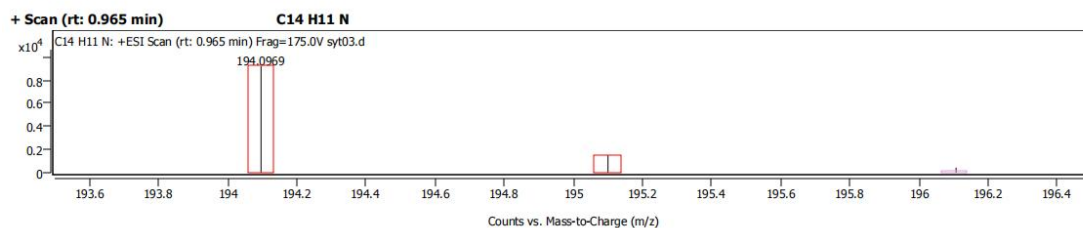

Figure S1. HRMS spectra of M4

## 5.2. Deuterium-labelling experiments

(a): 4-(3,3,3-trifluoroprop-1-en-2-yl)-1,1'-biphenyl (49.6 mg, 0.20 mmol), TMSN<sub>3</sub> (69.1 mg, 3.0 equiv), Eosin Y (6.5 mg, 5 mol%), DCE (1 mL) and D<sub>2</sub>O (20 mg, 5.0 equiv) were added into a 10 mL tube successively. The tube was charged with argon, which repeated three times. The reaction mixture was stirred at 40 °C under the irradiation by 35 W Blue LEDs for 72 h. The reaction was monitored by TLC. The crude reaction mixture was quenched with saturated sodium carbonate and extracted with EtOAc (3 x 20 mL). The extracts were combined, dried over sodium sulfate, filtered, and the volatiles were removed under reduced pressure. Column chromatography was performed using silica gel (200-300 mesh) or thin layer chromatography was performed using silica gel (GF254) to give product **D1-3+3** (35%, 61% D).

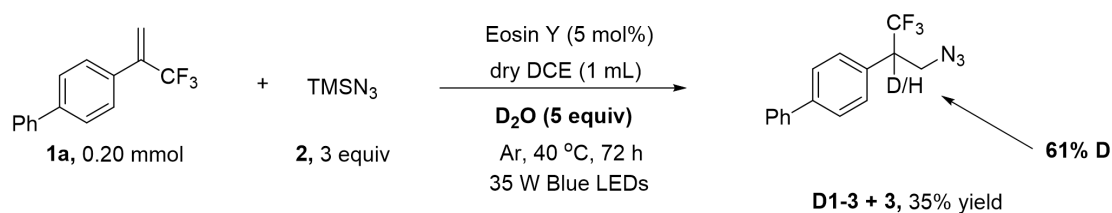



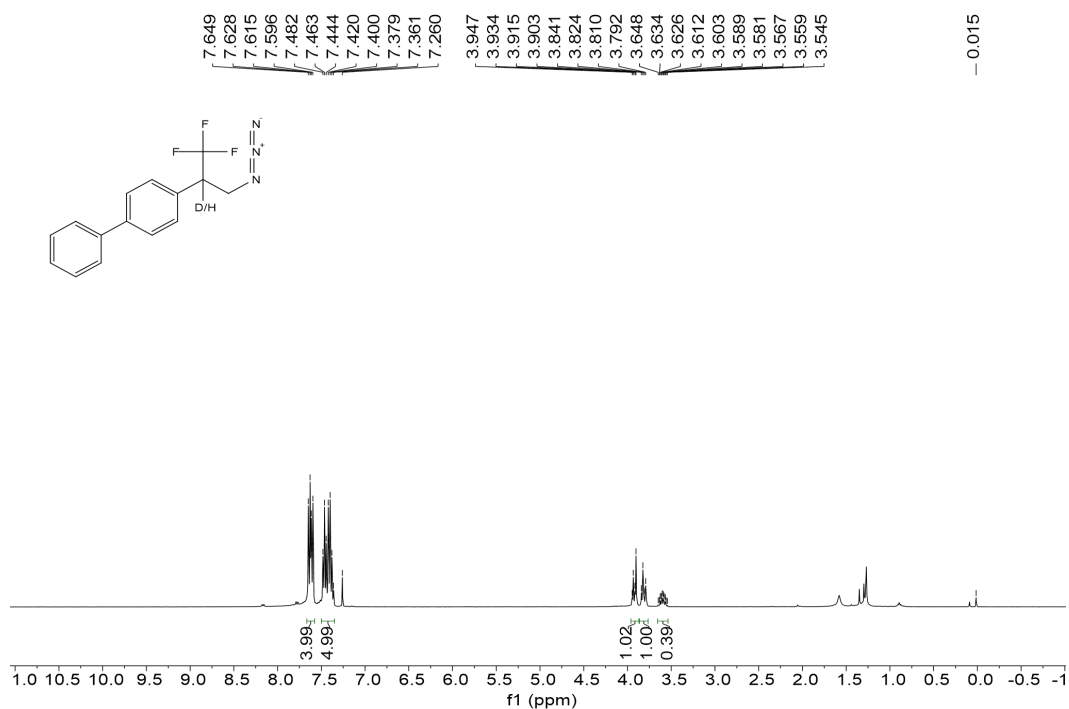

(b): 4-(3,3,3-trifluoroprop-1-en-2-yl)-1,1'-biphenyl (49.6 mg, 0.20 mmol), TMSN<sub>3</sub> (69.1 mg, 3.0 equiv), Eosin Y (6.5 mg, 5 mol%), DCE (1 mL) and D<sub>2</sub>O (200 mg, 50 equiv) were added into a 10 mL tube successively. The tube was charged with argon, which repeated three times. The

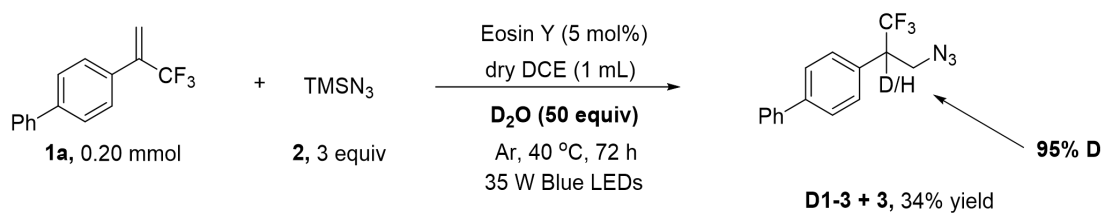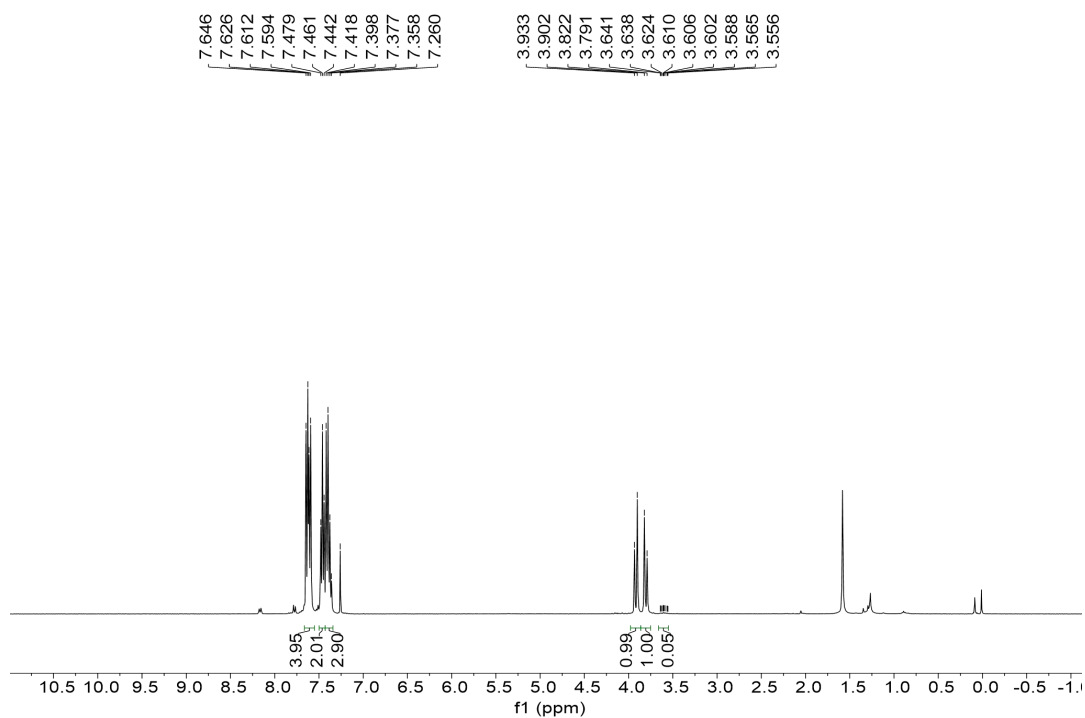

reaction mixture was stirred at 40 °C under the irradiation by 35 W Blue LEDs for 72 h. The reaction was monitored by TLC. The crude reaction mixture was quenched with saturated sodium carbonate and extracted with EtOAc (3 x 20 mL). The extracts were combined, dried over sodium sulfate, filtered, and the volatiles were removed under reduced pressure. Column chromatography was performed using silica gel (200-300 mesh) or thin layer chromatography was performed using silica gel (GF254) to give product **D1-3+3** (34%, 95% D).

(c): 4-(3,3,3-trifluoroprop-1-en-2-yl)-1,1'-biphenyl (49.6 mg, 0.20 mmol), TMSN<sub>3</sub> (69.1 mg, 3.0 equiv), Eosin Y (6.5 mg, 5 mol%) and CDCl<sub>3</sub> (1 mL) were added into a 10 mL tube successively. The tube was charged with argon, which repeated three times. The reaction mixture was stirred at 40 °C under the irradiation by 35 W Blue LEDs for 72 h. The reaction was monitored by TLC. The crude reaction mixture was quenched with saturated sodium carbonate and extracted with EtOAc (3 x 20 mL). The extracts were combined, dried over sodium sulfate, filtered, and the volatiles were removed under reduced pressure. Column chromatography was performed using silica gel (200-300 mesh) or thin layer chromatography was performed using silica gel (GF254) to give product **3** (51%, 0% D).

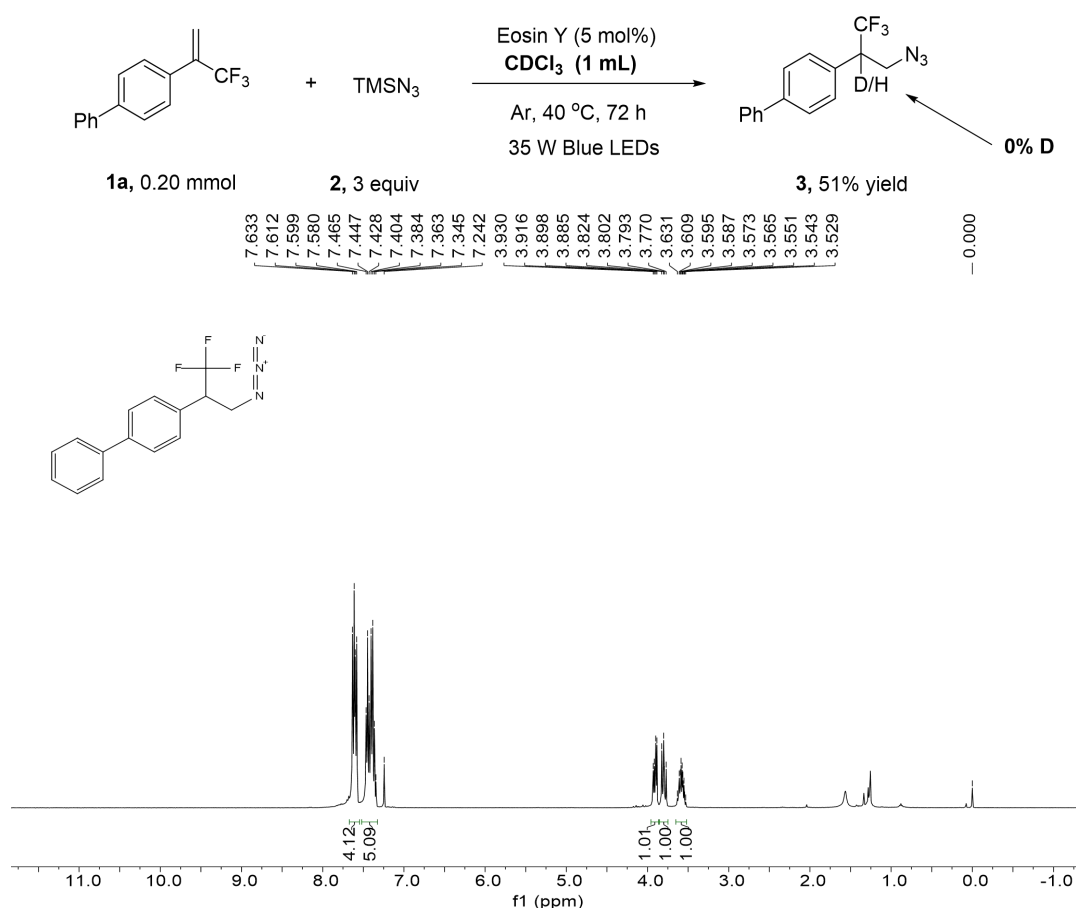

### 5.3. Radical clock experiment.

(1-cyclopropylvinyl)benzene (28.8 mg, 0.20 mmol), TMSN<sub>3</sub> (69.1 mg, 3.0 equiv), Eosin Y (6.5 mg, 5 mol%) and DCE (1 mL) were added into a 10 mL tube successively. The tube was charged with argon, which repeated three times. The reaction mixture was stirred at 40 °C under the irradiation by 35 W Blue LEDs for 72 h. The extracts were combined, dried over sodium

sulfate, filtered, and the volatiles were removed under reduced pressure. However, complex products were obtained, and it could not be purified by column chromatography as pure compounds. The ring-opened compounds were formed, thus supporting the involvement of the azide radical ( $N_3^{\cdot}$ ) in the catalytic reaction.

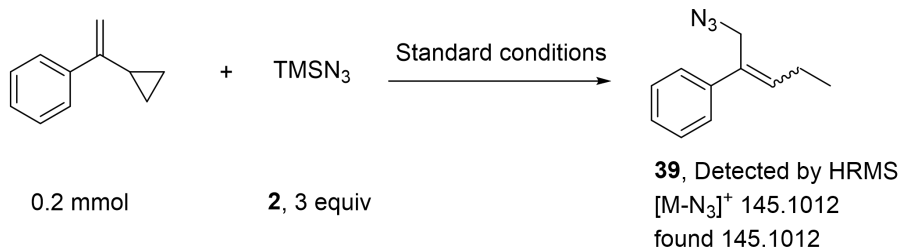

#### Sample Chromatograms

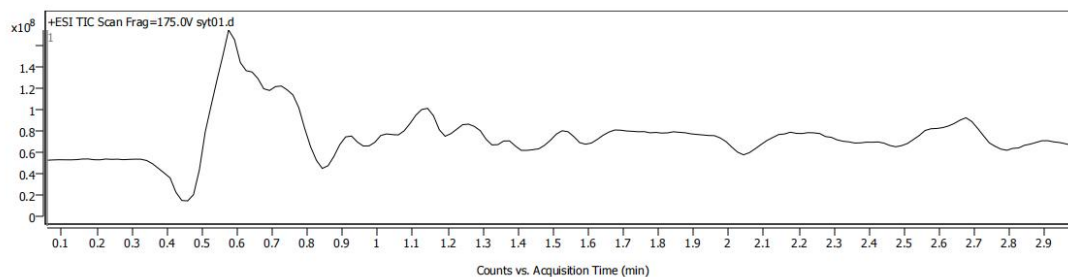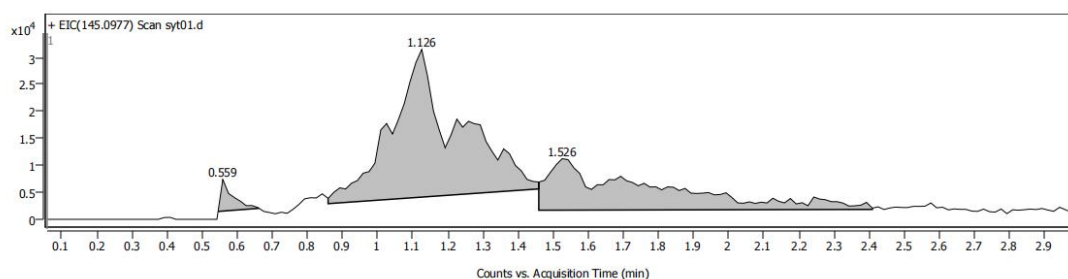

#### Chromatogram Peaks

| Peak | Start | RT    | End   | Height | Area   | Area % | SNR |
|------|-------|-------|-------|--------|--------|--------|-----|
| 1    | 0.546 | 0.559 | 0.662 | 5848   | 11386  | 3.13   |     |
| 2    | 0.859 | 1.126 | 1.459 | 27361  | 363475 | 100.00 |     |
| 3    | 1.459 | 1.526 | 2.409 | 9536   | 195156 | 53.69  |     |

#### Sample Spectra

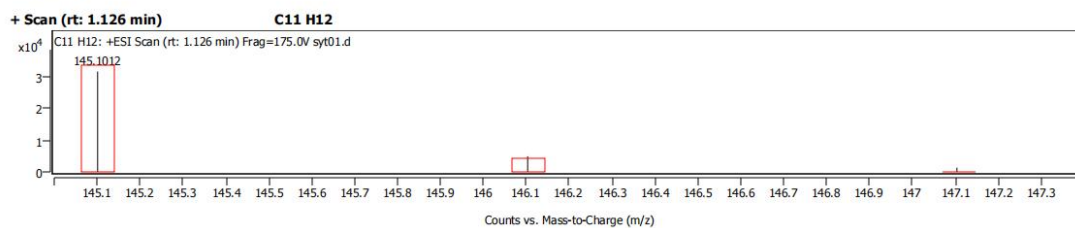

**Figure S2. HRMS of compounds 39**

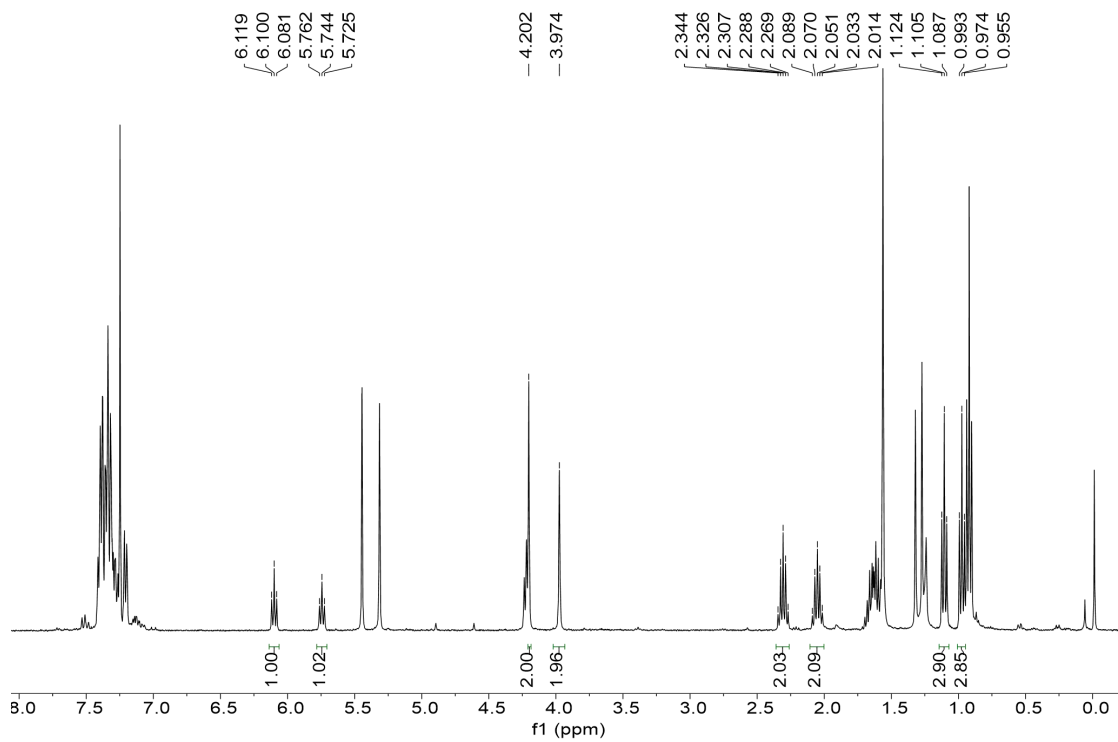

Figure S3. <sup>1</sup>H NMR spectra of compound 39

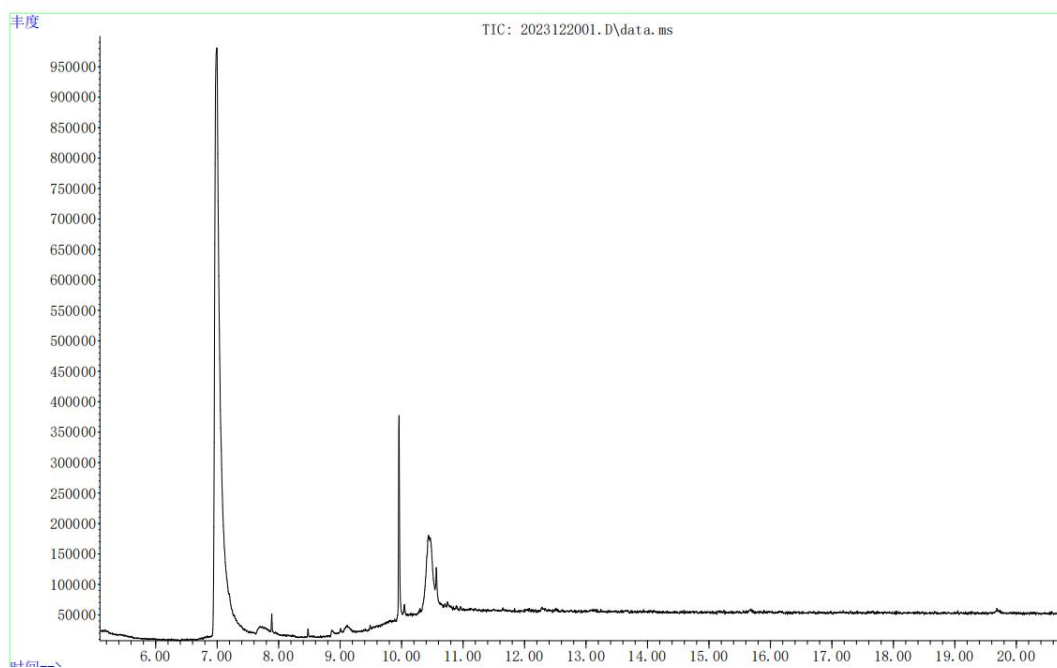

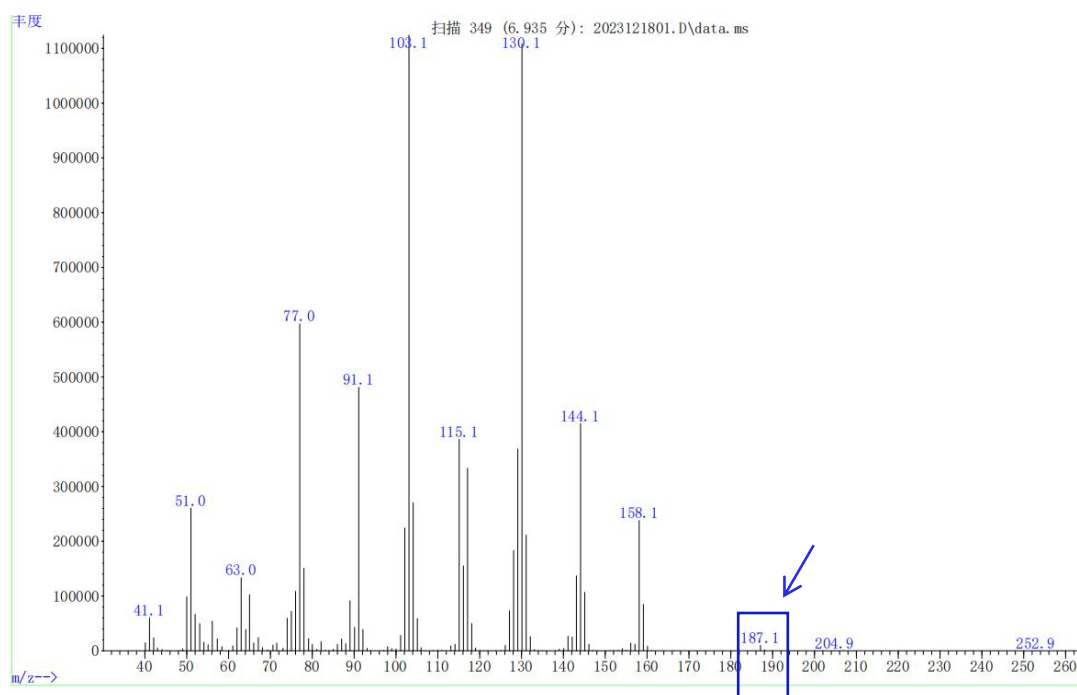

**Figure S4. GC-MS spectra of compound 39**

#### 5.4. Photo-irradiation on and off experiments.

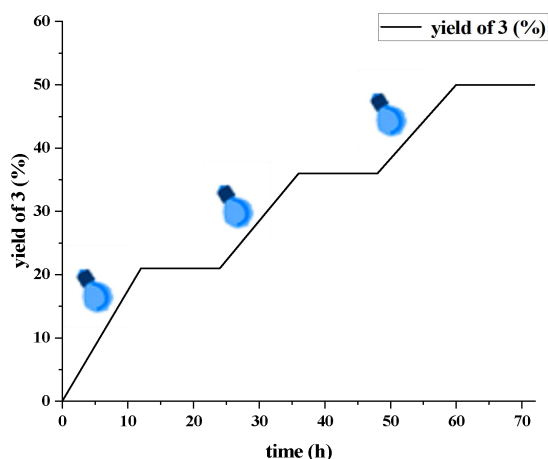

#### 5.5. Quantum yield determination

Blue LED ( $\lambda_{\text{max}} = 415 \text{ nm}$ ) was used for measurement of quantum yield.

##### Determination of the light intensity at 415 nm:

According to the procedure of Yoon,<sup>5</sup> the photon flux of the LED ( $\lambda_{\text{max}} = 415 \text{ nm}$ ) was determined by standard ferrioxalate actinometry. A 0.15 M solution of ferrioxalate was prepared by dissolving potassium ferrioxalate hydrate (0.737 g) in  $\text{H}_2\text{SO}_4$  (10 mL of a 0.05 M solution). A buffered solution of 1,10-phenanthroline was prepared by dissolving 1,10-phenanthroline (5.0 mg) and sodium acetate (1.13 g) in  $\text{H}_2\text{SO}_4$  (5.0 mL of a 0.5 M solution). Both solutions were stored in

the dark. To determine the photon flux of the LED, the ferrioxalate solution (2.0 mL) was placed in a cuvette and irradiated for 90 seconds at  $\lambda_{\max} = 415$  nm. After irradiation, the phenanthroline solution (0.35 mL) was added to the cuvette and the mixture was allowed to stir in the dark for 1 h to allow the ferrous ions to completely coordinate to the phenanthroline. The absorbance of the solution was measured at 510 nm. A non-irradiated sample was also prepared and the absorbance at 510 nm was measured (Figure S5). Conversion was calculated using eq 1.

$$\text{mol Fe}^{2+} = \frac{V \cdot \Delta A_{510\text{nm}}}{l \cdot \epsilon} \quad (1)$$

$$\text{mol Fe}^{2+} = \frac{(0.00235\text{L}) \cdot (3.70)}{(1.00\text{ cm}) \cdot (11,100 \frac{\text{L}}{\text{mol}} \text{ cm}^{-1})} = 7.83 \times 10^{-7} \text{ mol}$$

V is the total volume (0.00235 L) of the solution after addition of phenanthroline,  $\Delta A$  is the difference in absorbance at 510 nm between the irradiated and non-irradiated solutions, 1.00 is the path length (1.00 cm), and  $\epsilon$  is the molar absorptivity of the ferrioxalate actinometer at 510 nm (11,100 Lmol<sup>-1</sup>cm<sup>-1</sup>).

The photon flux can be calculated using eq 2.

$$\text{photon flux} = \frac{\text{mol Fe}^{2+}}{\Phi \cdot t \cdot f} \quad (2)$$

$$\text{photon flux} = \frac{7.83 \times 10^{-7} \text{ mol}}{(1.12) \cdot (90\text{s}) \cdot (1)} = 7.77 \times 10^{-9} \text{ einstein/s}$$

Where  $\Phi$  is the quantum yield for the ferrioxalate actinometer (1.12 at  $\lambda = 415$  nm), t is the irradiation time (90 s), and f is the fraction of light absorbed at 415 nm by the ferrioxalate actinometer. This value is calculated using eq 3 where  $A_{415\text{ nm}}$  is the absorbance of the ferrioxalate solution at 415 nm. An absorption spectrum gave an  $A_{415\text{ nm}}$  value of  $> 4$ , indicating that the fraction of absorbed light (f) is  $> 0.9999$ .

$$f = 1 - 10^{-A_{415\text{nm}}} \quad (3)$$

The photon flux was thus calculated to be  $7.77 \times 10^{-9}$  einsteins s<sup>-1</sup>

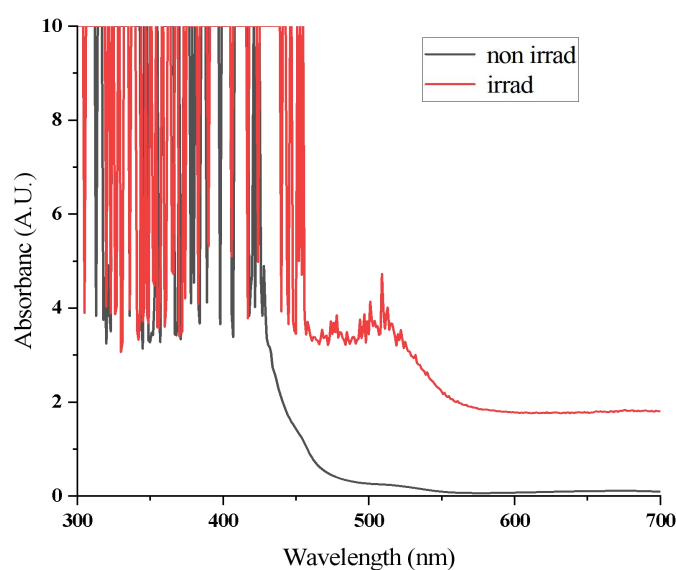

**Figure S5.** Absorbance of the ferrioxalate actinometer solution.

### Determination of the reaction quantum yield.

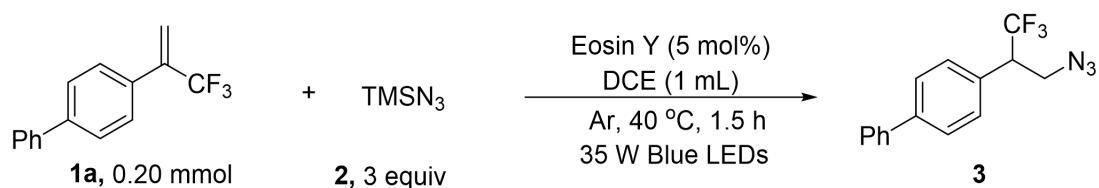

4-(3,3,3-trifluoroprop-1-en-2-yl)-1,1'-biphenyl (49.6 mg, 0.20 mmol), TMSN<sub>3</sub> (69.1 mg, 3.0 equiv), Eosin Y (6.5 mg, 5 mol%) and DCE (1 mL) were added into a 10 mL tube successively. The tube was charged with argon, which repeated three times. The reaction mixture was stirred at 40 °C under the irradiation by 35 W Blue LEDs for 1.5 h (5,400 s) under blue LED irradiation ( $\lambda = 415$  nm). The solvent was removed in vacuo and the yield of formed product was determined by <sup>19</sup>F NMR based on trifluorotoluene as internal standard. The yield of **3** was determined to be 4% ( $8.0 \times 10^{-6}$  mol of **3**).

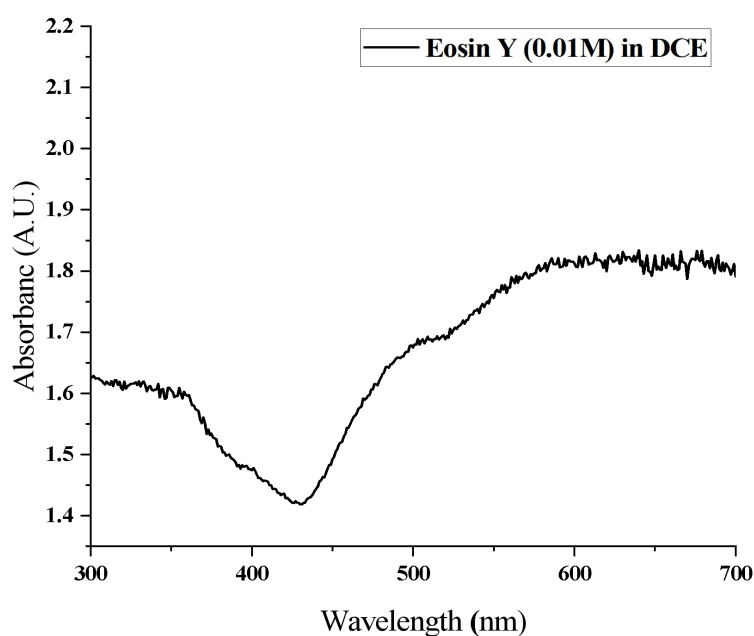

**Figure S6.** Absorption spectrum of Eosin Y [0.01 M] in DCE

The reaction quantum yield ( $\Phi$ ) was determined using eq 4 where the photon flux is  $7.77 \times 10^{-9}$  einsteins  $\text{s}^{-1}$  (determined by actinometry as described above),  $t$  is the reaction time (5,400 s) and  $f$  is the fraction of incident light absorbed by the catalyst, determined using eq 3. An absorption spectrum of the catalyst (0.01 M) gave an absorbance value of 1.443 at 415 nm (Figure S6), indicating that the fraction of light absorbed by the photocatalyst ( $f$ ) is 0.96.

$$\Phi = \frac{\text{mol product}}{\text{flux} \cdot t \cdot f} \quad (4)$$

$$\Phi = \frac{8.0 \times 10^{-6} \text{ mol}}{(7.77 \times 10^{-9} \text{ einstein/s}) \cdot (5400 \text{ s}) \cdot (0.96)} = 0.20$$

The reaction quantum yield ( $\Phi$ ) was calculated to be 0.20.

## 5.6. Stern-Volmer fluorescence quenching experiments

**Formulation solution:** 4-(3,3,3-trifluoroprop-1-en-2-yl)-1,1'-biphenyl (62.0 mg) was dissolved in DCE in a 25 mL volumetric flask to set the concentration to be 0.01 M. TMSN<sub>3</sub> (30.0 mg) was dissolved in DCE in a 25 mL volumetric flask to set the concentration to be 0.01 M. Dissolve the photocatalyst Eosin Y (8.8 mg) in DCE in a 25 mL volumetric flask, shake well, take out 5 mL of the solution and make up to volume with DCE in a 25 mL volumetric flask, setting the concentration to 0.1 mM.

**Experimental procedure:** The resulting 0.1 mM solution (20 μL) was added to cuvette to obtain different concentrations of catalyst solution. This solution was then diluted to a volume of 2.0 mL by adding DCE to prepare a 1.0 μM solution. The resulting mixture was sparged with nitrogen for 3 minutes and then irradiated at 515 nm. Fluorescence emission spectra were recorded (3 trials per sample). Into this solution, 10.0 μL of a 4-(3,3,3-trifluoroprop-1-en-2-yl)-1,1'-biphenyl solution was successively added and uniformly stirred, and the resulting irradiated at 515 nm. Fluorescence emission spectra of 0 μL, 10.0 μL, 20.0 μL, 30.0 μL and 40.0 μL fluorescence intensity. Follow this method and make changes to the amount to obtain the Stern–Volmer relationship in turn.

(a) Eosin Y quenched by TMSN<sub>3</sub> in DCE.

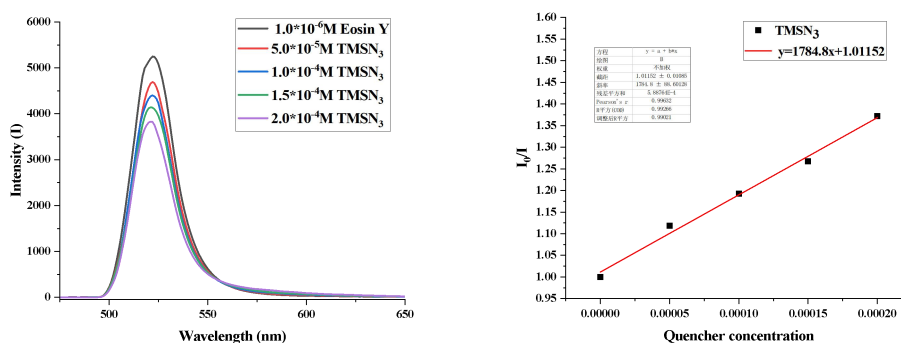

The emission intensity of the Eosin Y catalyst solution affected by the gradual increase of the amount of TMSN<sub>3</sub>.

(b) Eosin Y quenched by 4-(3,3,3-trifluoroprop-1-en-2-yl)-1,1'-biphenyl (1a) in DCE.

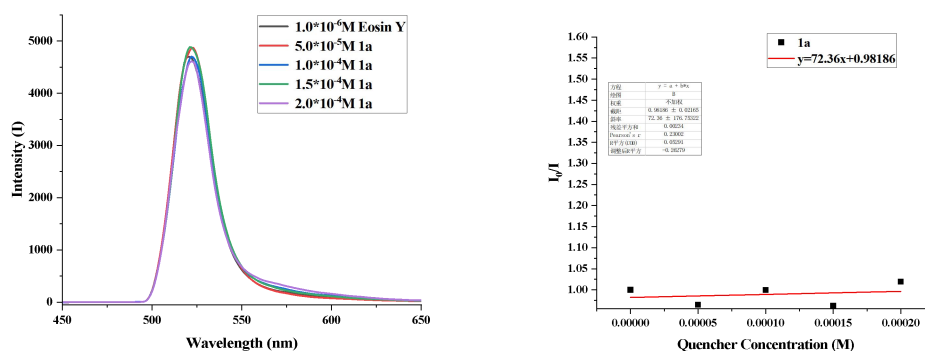



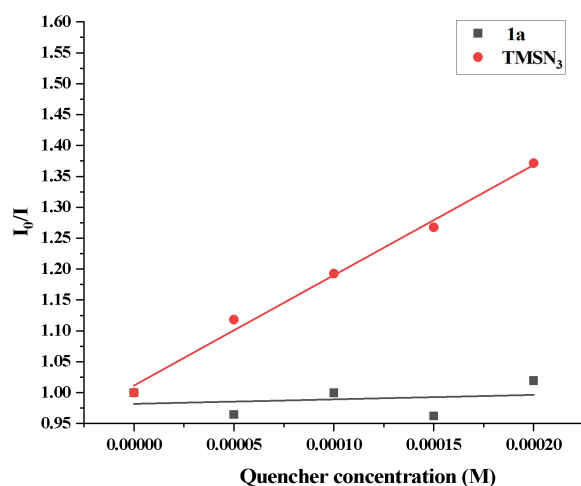

## 6. Selective transformations of hydroazidation product **3**

(1) The reaction was carried out by modifying the literature procedure.<sup>6</sup> To a reaction tube was added **3** (58.2 mg, 0.20 mmol) and trimethyl phosphite (28.4  $\mu$ L, 0.24 mmol) in toluene (2 mL) was heated at 80 °C with oil bath for 8 h, and then cooled to room temperature. Upon completion, the mixture was quenched with H<sub>2</sub>O and extracted with EtOAc (3 x 20 mL). The combined organic phases were washed with brine, dried (Na<sub>2</sub>SO<sub>4</sub>), filtered and concentrated under reduced pressure. The crude product **33** was purified by flash column chromatography (SiO<sub>2</sub> 200 - 300 mesh; gradient eluent: PE/EA= 2/1) to yield **33** (67.1 mg, 90%).

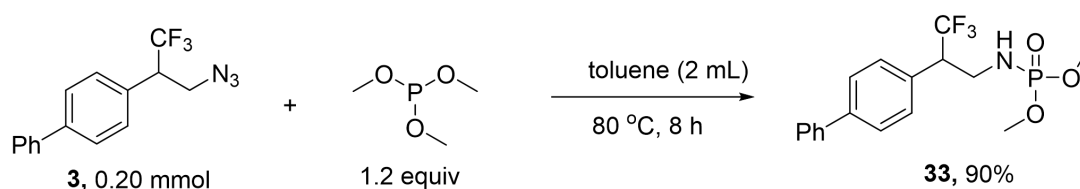

(2) The reaction was carried out by modifying the literature procedure.<sup>6</sup> To a reaction tube was added **3** (58.2 mg, 0.20 mmol), Boc<sub>2</sub>O (45.0  $\mu$ L, 0.20 mmol, 1.2 equiv) and 10% Pd/C (8.4 mg) were dissolved in EtOAc (2 mL), then replament of hydrogen (balloon). The resulting solution was stirred at 25 °C for 48 h. Upon completion, the mixture was quenched with H<sub>2</sub>O and extracted with EtOAc (3 x 20 mL). The combined organic phases were washed with brine, dried (Na<sub>2</sub>SO<sub>4</sub>), filtered and concentrated under reduced pressure. The crude product **34** was purified by flash column chromatography (SiO<sub>2</sub> (200 - 300 mesh); gradient eluent: PE/EA= 15/1) to yield **34** (65.7 mg, 90%).

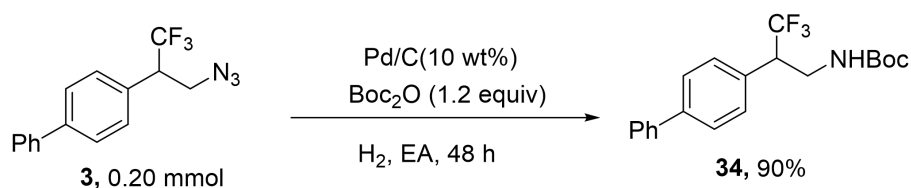

(3) The reaction was carried out by modifying the literature procedure.<sup>7</sup> To a reaction tube was added **3** (58.2 mg, 0.2 mmol) and dimethyl but-2-ynedioate (122.8  $\mu$ L, 0.22 mmol, 1.2 equiv)

in toluene (2 mL) was heated at 115 °C with oil bath for 6 h, and then cooled to room temperature. Upon completion, the mixture was quenched with H<sub>2</sub>O and extracted with EtOAc (3 x 20 mL). The combined organic phases were washed with brine, dried (Na<sub>2</sub>SO<sub>4</sub>), filtered and concentrated under reduced pressure. The crude product **35** was purified by flash column chromatography (SiO<sub>2</sub> (200 - 300 mesh); gradient eluent: PE/EA= 5/1) to yield **35** (68.4 mg, 79%).

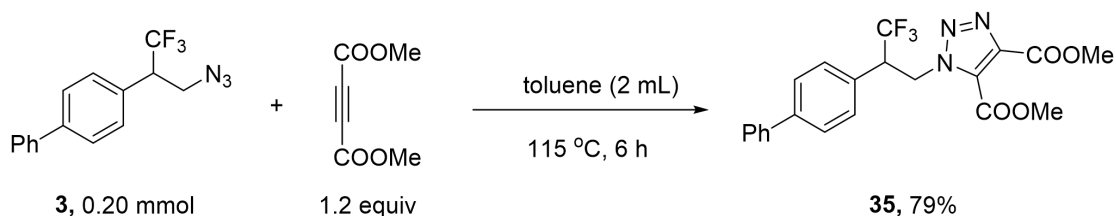

(4) The reaction was carried out by modifying the literature procedure.<sup>8</sup> To a reaction tube was added **3** (58.2 mg, 0.20 mmol), 2-(Trimethylsilyl)phenyl Triflate (71.5 mg, 0.24 mmol, 1.2 equiv) and CsF (60.4 mg, 0.40 mmol, 2.0 equiv) in MeCN (2 mL) was heated at 70 °C with oil bath for 18 h, and then cooled to room temperature. Upon completion, the mixture was quenched with H<sub>2</sub>O and extracted with EtOAc (3 x 20 mL). The combined organic phases were washed with brine, dried (Na<sub>2</sub>SO<sub>4</sub>), filtered and concentrated under reduced pressure. The crude product **36** was purified by flash column chromatography (SiO<sub>2</sub> (200 - 300 mesh); gradient eluent: PE/EA= 5/1) to yield **36** (55.1 mg, 75%).

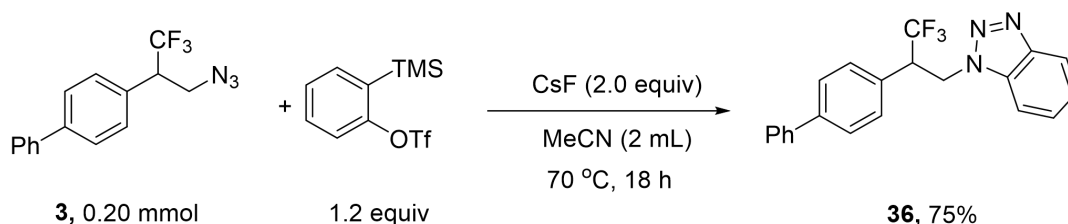

(5) The reaction was carried out by modifying the literature procedure.<sup>9</sup> To a reaction tube was added **3** (58.2 mg, 0.20 mmol) 13 equiv of ethyl carbonocyanidate (2.60 mmol, 0.257 g), and 1.0 equiv of ZnBr<sub>2</sub> (0.20 mmol 46.0 mg) at room temperature 25 °C for 45 h, and then cooled to room temperature. Upon completion, the mixture was quenched with H<sub>2</sub>O and extracted with EtOAc (3 x 20 mL). The combined organic phases were washed with brine, dried (Na<sub>2</sub>SO<sub>4</sub>), filtered and concentrated under reduced pressure. The crude product **37** was purified by flash column chromatography (SiO<sub>2</sub> (200 - 300 mesh); gradient eluent: PE/EA= 5/1) to yield **37** (40.6 mg, 52%).

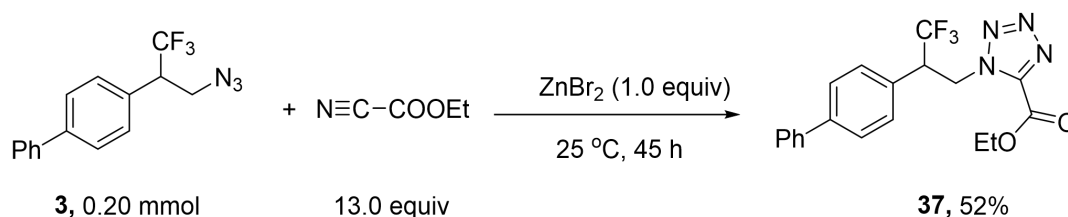

(6) The reaction was carried out by modifying the literature procedure.<sup>10</sup> To a reaction tube was added **3** (58.2 mg, 0.20 mmol) Malononitrile (19.8 mg, 0.30 mmol, 1.5 equiv), K<sub>2</sub>CO<sub>3</sub> (55.2 mg, 0.40 mmol, 2.0 equiv) in DMSO (2 mL) was heated at 45 °C with oil bath for 6 h, and then

cooled to room temperature. Upon completion, the mixture was quenched with H<sub>2</sub>O and extracted with EtOAc (3 x 20 mL). The combined organic phases were washed with brine, dried (Na<sub>2</sub>SO<sub>4</sub>), filtered and concentrated under reduced pressure. The crude product **38** was purified by flash column chromatography (SiO<sub>2</sub> (200 - 300 mesh); gradient eluent: PE/EA= 2/1) to yield **38** (33.0 mg, 46%).

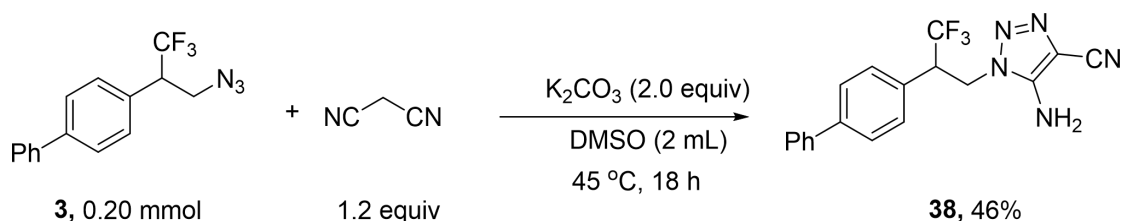

## 7. Characterization data of products

### 4-(3-azido-1,1,1-trifluoropropan-2-yl)-1,1'-biphenyl (**3**)

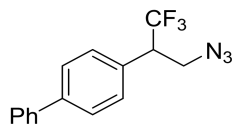

Prepared according to standard conditions. Purification by thin layer chromatography was performed (PE/EA:200/1) to yield **3** (43.1 mg, 74%) as a white solid, mp: 82 – 86 °C.

<sup>1</sup>H NMR (400 MHz, Chloroform-*d*) δ 7.54 – 7.49 (m, 4H), 7.38 – 7.34 (m, 5H), 3.84 – 3.79 (m, 1H), 3.73 – 3.68 (m, 1H), 3.54 – 3.44 (m, 1H).

<sup>13</sup>C NMR (101 MHz, Chloroform-*d*) δ 141.9, 140.2, 131.0 (d, *J* = 1.5 Hz), 129.3, 128.8, 127.7, 127.6, 127.1, 125.6 (q, *J* = 280.6 Hz), 50.2 (d, *J* = 2.5 Hz), 49.8 (q, *J* = 26.8 Hz).

<sup>19</sup>F NMR (376 MHz, Chloroform-*d*) δ -68.28.

HRMS (APCI) *m/z*: [M-N<sub>2</sub>+H]<sup>+</sup> calcd for C<sub>15</sub>H<sub>13</sub>F<sub>3</sub>N<sup>+</sup> 264.0995; found 264.0991.

### 4'-(3-azido-1,1,1-trifluoropropan-2-yl)-2,4-dimethyl-1,1'-biphenyl (**4**)

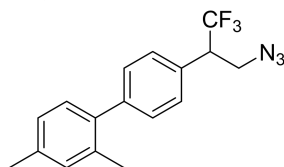

Prepared according to standard conditions. Purification by thin layer chromatography was performed (PE/EA: 50/1) to yield **4** (32.5 mg, 51%, 71% brsm) as a colorless liquid, with 28% of starting material recovered.

<sup>1</sup>H NMR (400 MHz, Chloroform-*d*) δ 7.35 (s, 3H), 7.14 – 7.10 (m, 2H), 7.07 – 7.05 (m, 2H), 3.90 – 3.86 (m, 1H), 3.82 – 3.77 (m, 1H), 3.63 – 3.53 (m, 1H), 2.36 (s, 3H), 2.24 (s, 3H).

<sup>13</sup>C NMR (101 MHz, Chloroform-*d*) δ 142.6, 138.1, 137.2, 135.1, 131.2, 130.3 (d, *J* = 1.9 Hz), 129.9, 129.6, 128.6, 126.5, 125.6 (q, *J* = 280.6 Hz), 50.3 (d, *J* = 2.6 Hz), 49.9 (d, *J* = 26.7 Hz), 21.0, 20.3.

<sup>19</sup>F NMR (376 MHz, Chloroform-*d*) δ -68.24.

HRMS (APCI) *m/z*: [M-N<sub>2</sub>+H]<sup>+</sup> calcd for C<sub>17</sub>H<sub>17</sub>F<sub>3</sub>N<sup>+</sup> 292.1308; found 292.1303.

#### 4-(3-azido-1,1,1-trifluoropropan-2-yl)-4'-(tert-butyl)-1,1'-biphenyl (5)

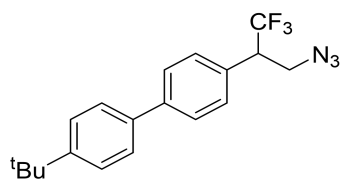

Prepared according to standard conditions. Purification by thin layer chromatography was performed (PE/EA: 80/1) to yield **5** (44.4 mg, 64%) as a yellow liquid.

$^1\text{H}$  NMR (400 MHz, Chloroform-*d*)  $\delta$  7.62 – 7.60 (m, 1H), 7.54 – 7.52 (m, 1H), 7.48 – 7.46 (m, 1H), 7.38 – 7.36 (m, 2H), 3.91 – 3.87 (m, 1H), 3.81 – 3.76 (m, 1H), 3.62 – 3.51 (m, 1H), 1.36 (s, 9H).

$^{13}\text{C}$  NMR (101 MHz, Chloroform-*d*)  $\delta$  150.8, 141.8, 137.4, 130.7 (d,  $J = 1.9$  Hz), 129.3, 127.6, 126.8, 125.9, 125.7 (q,  $J = 280.4$  Hz), 50.3 (d,  $J = 2.5$  Hz), 49.8 (q,  $J = 26.8$  Hz), 34.6, 31.4.

$^{19}\text{F}$  NMR (376 MHz, Chloroform-*d*)  $\delta$  -68.25.

HRMS (APCI)  $m/z$ :  $[\text{M}-\text{N}_2+\text{H}]^+$  calcd for  $\text{C}_{19}\text{H}_{21}\text{F}_3\text{N}^+$  320.1621; found 320.1616.

#### 4-(3-azido-1,1,1-trifluoropropan-2-yl)-4'-methoxy-1,1'-biphenyl (6)

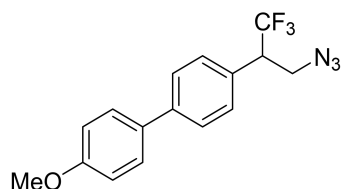

Prepared according to standard conditions. Purification by thin layer chromatography was performed (PE/EA: 50/1) to yield **6** (37.9 mg, 59%) as a white solid, mp: 91 - 95 °C.

$^1\text{H}$  NMR (400 MHz, Chloroform-*d*)  $\delta$  7.57 (d,  $J = 8.3$  Hz, 2H), 7.52 (d,  $J = 8.8$  Hz, 2H), 7.36 (d,  $J = 8.1$  Hz, 2H), 6.98 (d,  $J = 8.8$  Hz, 2H), 3.92 – 3.87 (m, 1H), 3.84 (s, 3H), 3.81 – 3.76 (m, 1H), 3.61 – 3.51 (m, 1H).

$^{13}\text{C}$  NMR (101 MHz, Chloroform-*d*)  $\delta$  159.4, 141.5, 132.7, 130.3 (d,  $J = 1.6$  Hz), 129.3, 128.1, 127.2, 125.6 (q,  $J = 280.6$  Hz), 114.3, 55.3, 50.2 (d,  $J = 2.5$  Hz), 49.7 (q,  $J = 26.7$  Hz).

$^{19}\text{F}$  NMR (376 MHz, Chloroform-*d*)  $\delta$  -68.31.

HRMS (APCI)  $m/z$ :  $[\text{M}-\text{N}_2+\text{H}]^+$  calcd for  $\text{C}_{16}\text{H}_{15}\text{F}_3\text{ON}^+$  294.1100; found 294.1095.

#### 4'-(3-azido-1,1,1-trifluoropropan-2-yl)-3-methoxy-1,1'-biphenyl (7)

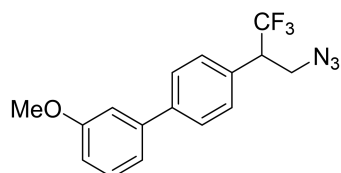

Prepared according to standard conditions. Purification by thin layer chromatography was performed (PE/EA: 50/1) to yield **7** (39.2 mg, 61%) as a yellow liquid.

$^1\text{H}$  NMR (400 MHz, Chloroform-*d*)  $\delta$  7.60 (d,  $J = 8.3$  Hz, 2H), 7.39 – 7.33 (m, 3H), 7.17 (d,  $J = 7.7$  Hz, 1H), 7.12 (s, 1H), 6.91 (dd,  $J = 8.2, 1.9$  Hz, 1H), 3.91 – 3.87 (m, 1H), 3.85 (s, 3H), 3.80 – 3.75 (m, 1H), 3.62 – 3.52 (m, 1H).

$^{13}\text{C}$  NMR (101 MHz, Chloroform-*d*)  $\delta$  160.0, 141.8, 141.7, 131.2 (d,  $J = 1.7$  Hz), 129.8, 129.3, 127.7, 125.6 (q,  $J = 280.5$  Hz), 119.6, 113.0, 112.9, 55.3, 50.2 (d,  $J = 2.5$  Hz), 49.8 (q,  $J = 26.8$  Hz).

$^{19}\text{F}$  NMR (376 MHz, Chloroform-*d*)  $\delta$  -68.27.

HRMS (APCI)  $m/z$ :  $[\text{M}-\text{N}_2+\text{H}]^+$  calcd for  $\text{C}_{16}\text{H}_{15}\text{F}_3\text{ON}^+$  294.1100; found 294.1096.

#### 4'-(3-azido-1,1,1-trifluoropropan-2-yl)-2-methoxy-1,1'-biphenyl (8)

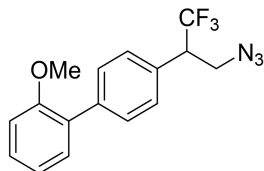

Prepared according to standard conditions. Purification by thin layer chromatography was performed (PE/EA: 50/1) to yield **8** (43.7 mg, 68%) as a yellow liquid.

$^1\text{H}$  NMR (400 MHz, Chloroform-*d*)  $\delta$  7.58 – 7.56 (m, 2H), 7.35 – 7.31 (m, 4H), 7.04 – 6.97 (m, 2H), 3.92 – 3.88 (m, 1H), 3.81 – 3.76 (m, 4H), 3.61 – 3.51 (m, 1H).

$^{13}\text{C}$  NMR (101 MHz, Chloroform-*d*)  $\delta$  156.4, 139.2, 130.8, 130.5 (d,  $J = 1.7$  Hz), 130.1, 129.6, 129.0, 128.5, 125.7 (q,  $J = 280.6$  Hz), 120.9, 111.3, 55.5, 50.3 (d,  $J = 2.4$  Hz), 49.8 (q,  $J = 26.7$  Hz).

$^{19}\text{F}$  NMR (376 MHz, Chloroform-*d*)  $\delta$  -68.15.

HRMS (ESI-TOF)  $m/z$ :  $[\text{M}^+ \text{Na}]^+$  calcd for  $\text{C}_{16}\text{H}_{14}\text{F}_3\text{N}_3\text{ONa}^+$  344.0981; found 343.0993.

#### 4'-(3-azido-1,1,1-trifluoropropan-2-yl)-3-(pent-4-en-1-yloxy)-1,1'-biphenyl (9)

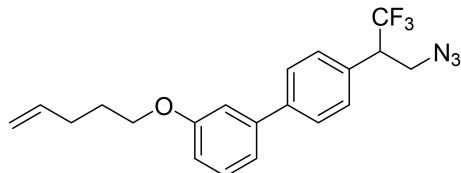

Prepared according to standard conditions. Purification by thin layer chromatography was performed (PE/EA: 50/1) to yield **9** (26.3 mg, 35%, 56% brsm) as a yellow liquid, with 37% of starting material recovered.

$^1\text{H}$  NMR (400 MHz, Chloroform-*d*)  $\delta$  7.62 – 7.60 (m, 2H), 7.39 – 7.33 (m, 3H), 7.17 – 7.15 (m, 1H), 7.12 (s, 1H), 6.92 – 5.89 (m, 1H), 5.92 – 5.82 (m, 1H), 5.08 (d,  $J = 17.1$  Hz, 1H), 5.01 (d,  $J = 10.2$  Hz, 1H), 4.03 (t,  $J = 6.4$  Hz, 2H), 3.93 – 3.88 (m, 1H), 3.82 – 3.77 (m, 1H), 3.63 – 3.53 (m, 1H), 2.26 (q,  $J = 7.0$  Hz, 2H), 1.91 (p,  $J = 6.7$  Hz, 2H).

$^{13}\text{C}$  NMR (101 MHz, Chloroform-*d*)  $\delta$  159.4, 141.8, 141.7, 137.8, 131.1 (d,  $J = 1.6$  Hz), 129.8, 129.3, 127.7, 125.6 (q,  $J = 280.5$  Hz), 119.5, 115.2, 113.6, 113.5, 67.2, 50.2 (d,  $J = 2.5$  Hz), 49.7 (q,  $J = 26.8$  Hz), 30.1, 28.4.

$^{19}\text{F}$  NMR (376 MHz, Chloroform-*d*)  $\delta$  -68.28.

HRMS (APCI)  $m/z$ :  $[\text{M}-\text{N}_2+\text{H}]^+$  calcd for  $\text{C}_{20}\text{H}_{21}\text{OF}_3\text{N}^+$  348.1570; found 348.1561.

#### 4-(3-azido-1,1,1-trifluoropropan-2-yl)-4'-fluoro-1,1'-biphenyl (10)

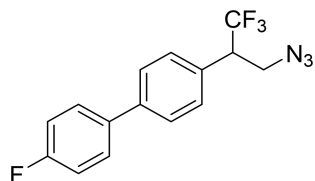

Prepared according to standard conditions. Purification by thin layer chromatography was performed (PE/EA: 250/1) to yield **10** (40.2 mg, 65%) as a yellow solid, mp: 91 - 95 °C.

$^1\text{H}$  NMR (400 MHz, Chloroform-*d*)  $\delta$  7.58 – 7.52 (m, 4H), 7.40 – 7.38 (m, 2H), 7.13 (t,  $J$  = 8.7 Hz, 2H), 3.93 – 3.89 (m, 1H), 3.82 – 3.77 (m, 1H), 3.63 – 3.53 (m, 1H).

$^{13}\text{C}$  NMR (101 MHz, Chloroform-*d*)  $\delta$  162.6 (d,  $J$  = 246.9 Hz), 140.9, 136.3 (d,  $J$  = 3.2 Hz), 131.0, 129.4, 128.7 (d,  $J$  = 8.1 Hz), 127.5, 125.5 (q,  $J$  = 280.5 Hz), 115.7 (d,  $J$  = 21.5 Hz), 50.2 (d,  $J$  = 2.4 Hz), 49.7 (q,  $J$  = 26.8 Hz).

$^{19}\text{F}$  NMR (376 MHz, Chloroform-*d*)  $\delta$  -68.31, -115.04.

HRMS (APCI)  $m/z$ :  $[\text{M}-\text{N}_2+\text{H}]^+$  calcd for  $\text{C}_{15}\text{H}_{12}\text{F}_4\text{N}^+$  282.0900; found 282.0897.

#### 4-(3-azido-1,1,1-trifluoropropan-2-yl)-4'-bromo-1,1'-biphenyl (**11**)

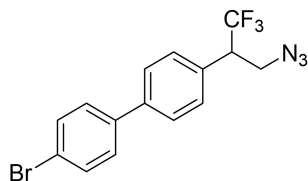

Prepared according to standard conditions. Purification by thin layer chromatography was performed (PE/EA: 250/1) to yield **11** (36.9 mg, 50%) as a yellow solid, mp: 41 - 45 °C.

$^1\text{H}$  NMR (400 MHz, Chloroform-*d*)  $\delta$  7.59 – 7.56 (m, 4H), 7.46 – 7.39 (m, 4H), 3.94 – 3.89 (m, 1H), 3.82 – 3.77 (m, 1H), 3.63 – 3.53 (m, 1H).

$^{13}\text{C}$  NMR (101 MHz, Chloroform-*d*)  $\delta$  140.7, 139.1, 132.0, 131.4 (d,  $J$  = 1.6 Hz), 129.5, 128.7, 127.5, 125.5 (q,  $J$  = 280.4 Hz), 122.0, 50.2 (d,  $J$  = 2.3 Hz), 49.8 (q,  $J$  = 26.8 Hz).

$^{19}\text{F}$  NMR (376 MHz, Chloroform-*d*)  $\delta$  -68.28.

HRMS (APCI)  $m/z$ :  $[\text{M}-\text{N}_2+\text{H}]^+$  calcd for  $\text{C}_{15}\text{H}_{12}\text{BrF}_3\text{N}^+$  342.0100; found 342.0094.

#### 4-(3-azido-1,1,1-trifluoropropan-2-yl)-4'-(trifluoromethyl)-1,1'-biphenyl (**12**)

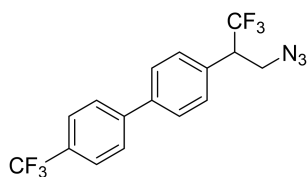

Prepared according to standard conditions. Purification by thin layer chromatography was performed (PE/EA: 250/1) to yield **12** (42.4 mg, 59%) as a colorless liquid.

$^1\text{H}$  NMR (400 MHz, Chloroform-*d*)  $\delta$  7.72 – 7.67 (m, 4H), 7.64 – 7.62 (m, 2H), 7.45 – 7.43 (m, 2H), 3.95 – 3.91 (m, 1H), 3.84 – 3.78 (m, 1H), 3.65 – 3.55 (m, 1H).

$^{13}\text{C}$  NMR (101 MHz, Chloroform-*d*)  $\delta$  143.699 (d,  $J$  = 1.1 Hz), 140.5, 132.1 (d,  $J$  = 1.7 Hz), 129.7 (d,  $J$  = 32.6 Hz), 129.6, 127.9, 127.4, 125.8 (q,  $J$  = 3.7 Hz), 125.5 (q,  $J$  = 280.4 Hz), 124.2 (q,  $J$  = 272.0 Hz), 50.2 (d,  $J$  = 2.6 Hz), 49.8 (q,  $J$  = 26.9 Hz).

$^{19}\text{F}$  NMR (376 MHz, Chloroform-*d*)  $\delta$  -62.45, -68.29.

HRMS (APCI)  $m/z$ :  $[M-N_2+H]^+$  calcd for  $C_{16}H_{12}F_6N^+$  332.0869; found 332.0862.

**methyl 4'-(3-azido-1,1,1-trifluoropropan-2-yl)-[1,1'-biphenyl]-4-carboxylate (13)**

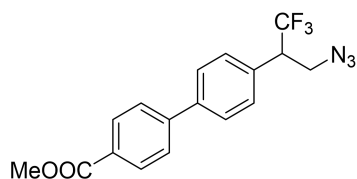

Prepared according to standard conditions. Purification by thin layer chromatography was performed (PE/EA: 30/1) to yield **13** (41.2 mg, 59%) as a white solid, mp: 57 - 61 °C.

$^1H$  NMR (400 MHz, Chloroform-*d*)  $\delta$  8.13 – 8.10 (m, 2H), 7.67 – 7.65 (m, 4H), 7.44 – 7.42 (m, 2H), 3.94 – 3.90 (m, 4H), 3.83 – 3.78 (m, 1H), 3.65 – 3.55 (m, 1H).

$^{13}C$  NMR (101 MHz, Chloroform-*d*)  $\delta$  166.8, 144.5, 140.7, 132.0 (d,  $J = 1.5$  Hz), 130.1, 129.5, 129.3, 127.8, 127.0, 125.5 (q,  $J = 280.6$  Hz), 52.1, 50.1 (d,  $J = 2.6$  Hz), 49.8 (q,  $J = 26.8$  Hz).

$^{19}F$  NMR (376 MHz, Chloroform-*d*)  $\delta$  -68.27.

HRMS (ESI-TOF)  $m/z$ :  $[M+Na]^+$  calcd for  $C_{17}H_{14}F_3N_3O_2Na^+$  372.0930; found 372.0947.

**4'-(3-azido-1,1,1-trifluoropropan-2-yl)-[1,1'-biphenyl]-4-carbonitrile (14)**

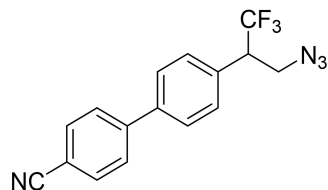

Prepared according to standard conditions. Purification by thin layer chromatography was performed (PE/EA: 20/1) to yield **14** (37.3 mg, 59%) as a yellow liquid.

$^1H$  NMR (400 MHz, Chloroform-*d*)  $\delta$  7.76 – 7.73 (m, 2H), 7.70 – 7.68 (m, 2H), 7.64 – 7.62 (m, 2H), 7.47 – 7.45 (m, 2H), 3.96 – 3.91 (m, 1H), 3.85 – 3.79 (m, 1H), 3.67 – 3.56 (m, 1H).

$^{13}C$  NMR (101 MHz, Chloroform-*d*)  $\delta$  144.6, 139.8, 132.6, 132.6 (d,  $J = 1.7$  Hz), 129.7, 127.8, 127.7, 125.3 (q,  $J = 280.5$  Hz), 118.7, 111.3, 50.0 (d,  $J = 2.6$  Hz), 49.7 (q,  $J = 26.9$  Hz).

$^{19}F$  NMR (376 MHz, Chloroform-*d*)  $\delta$  -68.24.

HRMS (ESI-TOF)  $m/z$ :  $[M+Na]^+$  calcd for  $C_{16}H_{11}F_3N_4Na^+$  339.0828; found 339.0839.

**1-(3-azido-1,1,1-trifluoropropan-2-yl)-4-methoxybenzene (15)**

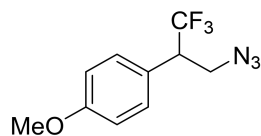

Prepared according to standard conditions. Purification by thin layer chromatography was performed (PE/EA: 50/1) to yield **15** (28.9 mg, 59%) as a yellow liquid.

$^1H$  NMR (400 MHz, Chloroform-*d*)  $\delta$  7.24 (d,  $J = 8.4$  Hz, 2H), 6.93 (d,  $J = 8.7$  Hz, 2H), 3.85 – 3.81 (m, 4H), 3.75 – 3.69 (m, 1H), 3.54 – 3.43 (m, 1H).

$^{13}C$  NMR (101 MHz, Chloroform-*d*)  $\delta$  160.0, 130.0, 125.6 (q,  $J = 280.4$  Hz), 123.9 (d,  $J = 1.8$  Hz), 114.4, 55.2, 50.2 (q,  $J = 2.5$  Hz), 49.3 (q,  $J = 26.7$  Hz).

$^{19}F$  NMR (376 MHz, Chloroform-*d*)  $\delta$  -68.76.

HRMS (ESI-TOF)  $m/z$ :  $[M-N_3]^+$  calcd for  $C_{10}H_{10}F_3O^+$  203.0678; found 203.0681.

### 5-(3-azido-1,1,1-trifluoropropan-2-yl)-1,2,3-trimethoxybenzene (16)

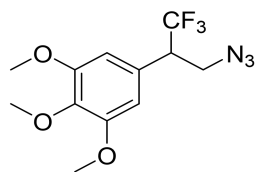

Prepared according to standard conditions. Purification by thin layer chromatography was performed (PE/EA: 30/1) to yield **16** (40.9 mg, 67%) as a yellow liquid.

$^1H$  NMR (400 MHz, Chloroform-*d*)  $\delta$  6.44 (s, 2H), 3.82 – 3.75 (m, 10H), 3.69 – 3.64 (m, 1H), 3.43 – 3.33 (m, 1H).

$^{13}C$  NMR (101 MHz, Chloroform-*d*)  $\delta$  153.4, 138.5, 127.4 (d,  $J = 1.6$  Hz), 125.5 (q,  $J = 280.4$  Hz), 106.0, 60.8, 56.1, 50.3 (d,  $J = 2.4$  Hz), 50.2 (q,  $J = 26.8$  Hz).

$^{19}F$  NMR (376 MHz, Chloroform-*d*)  $\delta$  -68.30.

HRMS (ESI-TOF)  $m/z$ :  $[M+Na]^+$  calcd for  $C_{12}H_{14}F_3N_3O_3Na^+$  328.0879; found 328.0890.

### 1-(3-azido-1,1,1-trifluoropropan-2-yl)-4-phenoxybenzene (17)

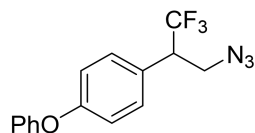

Prepared according to standard conditions. Purification by thin layer chromatography was performed (PE/EA: 80/1) to yield **17** (30.7 mg, 50%) as a yellow liquid.

$^1H$  NMR (400 MHz, Chloroform-*d*)  $\delta$  7.27 (t,  $J = 8.0$  Hz, 2H), 7.19 (d,  $J = 8.5$  Hz, 2H), 7.05 (t,  $J = 7.4$  Hz, 1H), 6.96 – 6.92 (m, 4H), 3.77 – 3.73 (m, 1H), 3.67 – 3.62 (m, 1H), 3.48 – 3.38 (m, 1H).

$^{13}C$  NMR (101 MHz, Chloroform-*d*)  $\delta$  158.1, 156.4, 130.3, 129.8, 126.3 (d,  $J = 2.1$  Hz), 125.5 (q,  $J = 280.4$  Hz), 123.8, 119.4, 118.7, 50.2 (d,  $J = 2.5$  Hz), 49.4 (q,  $J = 26.9$  Hz).

$^{19}F$  NMR (376 MHz, Chloroform-*d*)  $\delta$  -68.56.

HRMS (APCI):  $m/z$  calcd for  $C_{15}H_{13}F_3ON^+$  ( $M-N_2+H$ ) $^+$ : 280.0944; found: 280.0941.

HRMS (APCI)  $m/z$ :  $[M-N_2+H]^+$  calcd for  $C_{15}H_{13}F_3ON^+$  280.0944; found 280.0941.

### 5-(3-azido-1,1,1-trifluoropropan-2-yl)benzo[d][1,3]dioxole (18)

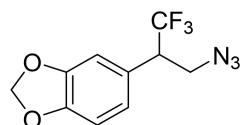

Prepared according to standard conditions. Purification by thin layer chromatography was performed (PE/EA: 30/1) to yield **18** (18.1 mg, 35%) as a yellow liquid.

$^1H$  NMR (400 MHz, Chloroform-*d*)  $\delta$  6.84 – 6.77 (m, 3H), 6.00 (s, 2H), 3.84 – 3.79 (m, 1H), 3.72 – 3.67 (m, 1H), 3.50 – 3.40 (m, 1H).

$^{13}C$  NMR (101 MHz, Chloroform-*d*)  $\delta$  148.2, 148.1, 125.4 (q,  $J = 280.5$  Hz), 125.4 (d,  $J = 1.8$  Hz), 122.9, 108.7, 108.6, 101.4, 50.2 (d,  $J = 2.6$  Hz), 49.7 (q,  $J = 26.8$  Hz).

$^{19}F$  NMR (376 MHz, Chloroform-*d*)  $\delta$  -68.69.



HRMS (APCI)  $m/z$ :  $[M-N_2+H]^+$  calcd for  $C_{10}H_9F_3O_2N^+$  232.0580; found 232.0576.

**(4-(3-azido-1,1,1-trifluoropropan-2-yl)phenyl)(methyl)sulfane (19)**

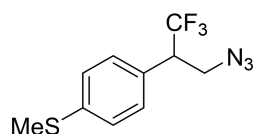

Prepared according to standard conditions. Purification by thin layer chromatography was performed (PE/EA: 150/1) to yield **19** (30.3 mg, 58%) as a yellow liquid.

$^1H$  NMR (400 MHz, Chloroform-*d*)  $\delta$  7.19 (t,  $J = 6.6$  Hz, 4H), 3.81 – 3.76 (m, 1H), 3.69 – 3.64 (m, 1H), 3.47 – 3.37 (m, 1H), 2.42 (s, 3H).

$^{13}C$  NMR (101 MHz, Chloroform-*d*)  $\delta$  139.9, 129.2, 128.4 (d,  $J = 1.2$  Hz), 126.5, 125.4 (q,  $J = 280.5$  Hz), 50.1 (d,  $J = 2.6$  Hz), 49.5 (q,  $J = 26.8$  Hz), 15.3.

$^{19}F$  NMR (376 MHz, Chloroform-*d*)  $\delta$  -68.50.

HRMS (ESI-TOF)  $m/z$ :  $[M-N_3]^+$  calcd for  $C_{10}H_{10}F_3S^+$  219.0450; found 219.0445.

**N-(3-(3-azido-1,1,1-trifluoropropan-2-yl)phenyl)-4-bromobenzamide (20)**

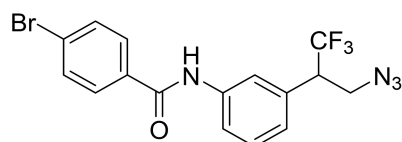

Prepared according to standard conditions. Purification by thin layer chromatography was performed (PE/EA: 6/1) to yield **20** (33.0 mg, 40%) as a white solid, mp: 118 - 122 °C.

$^1H$  NMR (400 MHz, Chloroform-*d*)  $\delta$  8.07 (d,  $J = 45.6$  Hz, 1H), 7.73 – 7.70 (m, 3H), 7.63 – 7.56 (m, 3H), 7.41 – 7.36 (m, 1H), 7.13 (d,  $J = 7.6$  Hz, 1H), 3.89 – 3.83 (m, 1H), 3.80 – 3.73 (m, 1H), 3.58 – 3.47 (m, 1H).

$^{13}C$  NMR (101 MHz, Chloroform-*d*)  $\delta$  165.0, 138.3, 133.4, 133.2 (d,  $J = 1.7$  Hz), 132.1, 132.0, 129.7, 128.6, 126.8, 125.4 (q,  $J = 280.7$  Hz), 125.1, 120.6, 50.1, 49.9 (q,  $J = 26.8$  Hz).

$^{19}F$  NMR (376 MHz, Chloroform-*d*)  $\delta$  -68.16.

HRMS (ESI-TOF)  $m/z$ :  $[M+Na]^+$  calcd for  $C_{16}H_{12}BrF_3N_4ONa^+$  435.0039; found 435.0055.

**1-(4-(3-azido-1,1,1-trifluoropropan-2-yl)phenyl)ethan-1-one (21)**

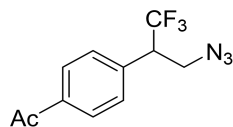

Prepared according to standard conditions. Purification by thin layer chromatography was performed (PE/EA: 15/1) to yield **21** (19.0 mg, 37%, 67% brsm) as a yellow liquid, with 45% of starting material recovered.

$^1H$  NMR (400 MHz, Chloroform-*d*)  $\delta$  8.00 (d,  $J = 8.3$  Hz, 2H), 7.45 (d,  $J = 8.1$  Hz, 2H), 3.95 – 3.90 (m, 1H), 3.83 – 3.77 (m, 1H), 3.67 – 3.57 (m, 1H), 2.62 (s, 3H).

$^{13}C$  NMR (101 MHz, Chloroform-*d*)  $\delta$  197.3, 137.5, 137.1 (d,  $J = 1.6$  Hz), 129.2, 128.8, 125.2 (d,  $J = 280.6$  Hz), 50.0 (q,  $J = 27.0$  Hz), 49.9 (q,  $J = 2.6$  Hz), 26.6.

$^{19}F$  NMR (376 MHz, Chloroform-*d*)  $\delta$  -68.08.

HRMS (ESI-TOF)  $m/z$ :  $[M+Na]^+$  calcd for  $C_{11}H_{10}F_3N_3ONa^+$  280.0668; found 280.0677.

### 1-(3-azido-1,1,1-trifluoropropan-2-yl)-4-nitrobenzene (**22**)

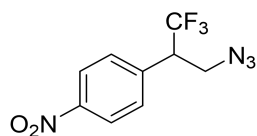

Prepared according to standard conditions. Purification by thin layer chromatography was performed (PE/EA: 30/1) to yield **22** (14.6 mg, 28%, 58% brsm) as a yellow liquid, with 52% of starting material recovered.

$^1H$  NMR (400 MHz, Chloroform-*d*)  $\delta$  8.28 (d,  $J$  = 8.5 Hz, 2H), 7.55 (d,  $J$  = 8.5 Hz, 2H), 3.99 – 3.95 (m, 1H), 3.85 – 3.80 (m, 1H), 3.74 – 3.64 (m, 1H).

$^{13}C$  NMR (101 MHz, Chloroform-*d*)  $\delta$  148.3, 139.1 (d,  $J$  = 1.7 Hz), 130.1, 124.9 (q,  $J$  = 280.7 Hz), 124.1, 49.85 (q,  $J$  = 27.3 Hz), 49.84 (d,  $J$  = 2.6 Hz).

$^{19}F$  NMR (376 MHz, Chloroform-*d*)  $\delta$  -67.98.

HRMS (APCI)  $m/z$ :  $[M-N_2+H]^+$  calcd for  $C_9H_8F_3O_2N_2^+$  233.0532; found 233.0530.

### 2-(3-azido-1,1,1-trifluoropropan-2-yl)naphthalene (**23**)

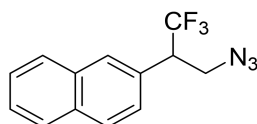

Prepared according to standard conditions. Purification by thin layer chromatography was performed (PE/EA: 200/1) to yield **23** (31.3 mg, 59%) as a yellow liquid.

$^1H$  NMR (400 MHz, Chloroform-*d*)  $\delta$  7.81 – 7.76 (m, 3H), 7.72 (s, 1H), 7.46 – 7.42 (m, 2H), 7.34 (d,  $J$  = 8.5 Hz, 1H), 3.90 – 3.85 (m, 1H), 3.81 – 3.76 (m, 1H), 3.67 – 3.57 (m, 1H).

$^{13}C$  NMR (101 MHz, Chloroform-*d*)  $\delta$  133.2, 133.1, 129.4 (d,  $J$  = 1.7 Hz), 128.8, 128.7, 127.9, 127.7, 126.7, 126.6, 125.6 (q,  $J$  = 280.7 Hz), 125.6, 50.2 (d,  $J$  = 2.6 Hz), 50.2 (q,  $J$  = 26.8 Hz).

$^{19}F$  NMR (376 MHz, Chloroform-*d*)  $\delta$  -68.05.

HRMS (APCI)  $m/z$ :  $[M-N_2+H]^+$  calcd for  $C_{13}H_{11}F_3N^+$  238.0838; found 238.0834.

### 2-(3-(1,1-difluoro-4-(4-methoxyphenyl)but-1-en-2-yl)phenyl)isoindoline-1,3-dione (**24**)

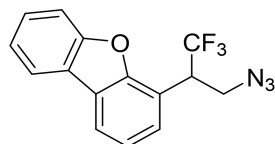

Prepared according to standard conditions. Purification by thin layer chromatography was performed (PE/EA: 200/1) to yield **24** (28.7 mg, 47%) as a yellow liquid.

$^1H$  NMR (400 MHz, Chloroform-*d*)  $\delta$  7.91 – 7.88 (m, 2H), 7.54 – 7.52 (m, 1H), 7.44 – 7.38 (m, 2H), 7.34 – 7.28 (m, 2H), 4.35 – 4.24 (m, 1H), 3.96 – 3.94 (m, 2H).

$^{13}C$  NMR (101 MHz, Chloroform-*d*)  $\delta$  156.0, 154.8, 127.6, 126.3, 125.6 (q,  $J$  = 280.6 Hz), 124.7, 124.0, 123.1, 123.1, 121.2, 120.8, 116.2 (d,  $J$  = 1.8 Hz), 111.8, 49.5 (d,  $J$  = 2.4 Hz), 43.9 (q,  $J$  = 27.6 Hz).

$^{19}F$  NMR (376 MHz, Chloroform-*d*)  $\delta$  -67.92.

HRMS (APCI)  $m/z$ :  $[M-N_2+H]^+$  calcd for  $C_{15}H_{11}F_3ON^+$  278.0787; found 278.0783.

**4'-(3-azido-1,1,1-trifluoropropan-2-yl)-[1,1'-biphenyl]-3-yl 2-(4-(2,2-dichlorocyclopropyl)phenoxy)-2-methylpropanoate (28)**

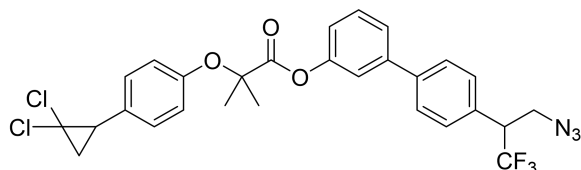

Prepared according to standard conditions. Purification by thin layer chromatography was performed (PE/EA: 8/1) to yield **28** (68.1 mg, 58%) as a yellow oil.

$^1H$  NMR (400 MHz, Chloroform-*d*)  $\delta$  7.56 – 7.54 (m, 2H), 7.45 – 7.38 (m, 4H), 7.24 – 7.16 (m, 3H), 6.98 – 6.95 (m, 3H), 3.92 – 3.88 (m, 1H), 3.81 – 3.78 (m, 1H), 3.63 – 3.53 (m, 1H), 2.85 (dd,  $J = 10.3, 8.7$  Hz, 1H), 1.94 (dd,  $J = 10.6, 7.5$  Hz, 1H), 1.80 – 1.76 (m, 7H).

$^{13}C$  NMR (101 MHz, Chloroform-*d*)  $\delta$  172.8, 155.0, 150.9, 141.8, 140.7, 131.5 (d,  $J = 1.5$  Hz), 129.82, 129.81, 129.4, 128.4, 127.7, 125.5 (q,  $J = 280.5$  Hz), 124.8, 120.4, 120.0, 118.5, 79.3, 60.8, 50.1 (d,  $J = 2.6$  Hz), 49.7 (q,  $J = 26.8$  Hz), 34.7, 25.7, 25.4 (d,  $J = 2.3$  Hz).

$^{19}F$  NMR (376 MHz, Chloroform-*d*)  $\delta$  -68.22.

HRMS (ESI-TOF)  $m/z$ :  $[M+Na]^+$  calcd for  $C_{28}H_{24}Cl_2F_3N_3O_3Na^+$  600.1039; found 600.1050.

**N-(4'-(3-azido-1,1,1-trifluoropropan-2-yl)-[1,1'-biphenyl]-3-yl)-5-(2,5-dimethylphenoxy)-2,2-dimethylpentanamide (29)**

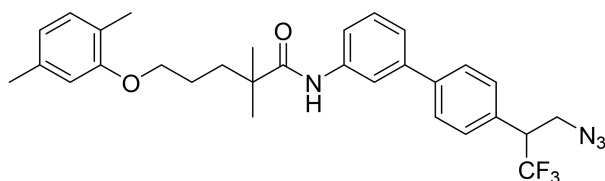

Prepared according to standard conditions. Purification by thin layer chromatography was performed (PE/EA: 6/1) to yield **29** (34.4 mg, 32%) as a white solid, mp: 91 - 95 °C.

$^1H$  NMR (400 MHz, Chloroform-*d*)  $\delta$  7.83 (s, 1H), 7.61 – 7.59 (m, 2H), 7.48 – 7.46 (m, 2H), 7.40 – 7.32 (m, 4H), 6.99 (d,  $J = 7.5$  Hz, 1H), 6.65 (d,  $J = 7.5$  Hz, 1H), 6.61 (s, 1H), 3.95 (s, 2H), 3.92 – 3.88 (m, 1H), 3.81 – 3.76 (m, 1H), 3.62 – 3.52 (m, 1H), 2.27 (s, 3H), 2.17 (s, 3H), 1.84 (s, 4H), 1.36 (s, 6H).

$^{13}C$  NMR (101 MHz, Chloroform-*d*)  $\delta$  175.8, 156.7, 141.4, 141.1, 138.3, 136.5, 131.2 (d,  $J = 1.5$  Hz), 130.3, 129.3, 129.2, 127.7, 125.5 (q,  $J = 280.6$  Hz), 123.4, 122.9, 120.8, 119.1, 118.9, 112.2, 67.8, 50.2 (d,  $J = 2.4$  Hz), 49.7 (q,  $J = 26.8$  Hz), 42.8, 37.6, 25.6, 25.1, 21.3, 15.8.

$^{19}F$  NMR (376 MHz, Chloroform-*d*)  $\delta$  -68.29.

HRMS (ESI-TOF)  $m/z$ :  $[M+Na]^+$  calcd for  $C_{30}H_{33}F_3N_4O_2Na^+$  561.2448; found 561.2455.

**4'-(3-azido-1,1,1-trifluoropropan-2-yl)-[1,1'-biphenyl]-3-yl 2-(11-oxo-6,11-dihydrodibenzo[b,e]oxepin-2-yl)acetate (30)**

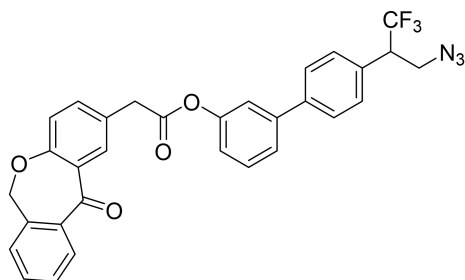

Prepared according to standard conditions. Purification by thin layer chromatography was performed (PE/EA: 8/1) to yield **30** (43.4 mg, 39%) as a yellow oil.

$^1\text{H}$  NMR (400 MHz, Chloroform-*d*)  $\delta$  8.25 (d,  $J = 2.1$  Hz, 1H), 7.91 – 7.89 (m, 1H), 7.59 – 7.52 (m, 4H), 7.49 – 7.42 (m, 3H), 7.39 – 7.35 (m, 3H), 7.30 (s, 1H), 7.10 – 7.06 (m, 2H), 5.19 (s, 2H), 3.91 – 3.87 (m, 3H), 3.81 – 3.75 (m, 1H), 3.62 – 3.52 (m, 1H).

$^{13}\text{C}$  NMR (101 MHz, Chloroform-*d*)  $\delta$  190.7, 169.8, 160.6, 151.0, 141.7, 140.7, 140.3, 136.2, 135.4, 132.7, 132.5, 131.4 (d,  $J = 1.2$  Hz), 129.7, 129.4, 129.3, 129.2, 127.8, 127.7, 127.1, 125.5 (d,  $J = 280.4$  Hz), 125.2, 124.6, 121.2, 120.6, 120.1, 73.5, 50.1 (d,  $J = 2.3$  Hz), 49.7 (q,  $J = 26.7$  Hz), 40.2.

$^{19}\text{F}$  NMR (376 MHz, Chloroform-*d*)  $\delta$  -68.24.

HRMS (APCI)  $m/z$ :  $[\text{M}+\text{H}]^+$  calcd for  $\text{C}_{31}\text{H}_{23}\text{O}_4\text{F}_3\text{N}_3^+$  558.1635; found 558.1625.

#### 4-(3-azido-1,1,1-trifluoropropan-2-yl)benzyl (2S)-2-(6-methoxynaphthalen-2-yl)propanoate (**31**)

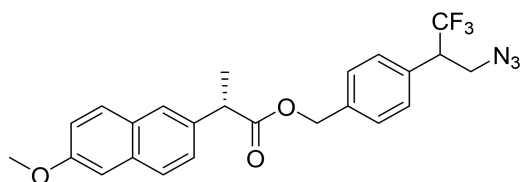

Prepared according to standard conditions. Purification by thin layer chromatography was performed (PE/EA: 8/1) to yield **31** (27.4 mg, 30%) as a yellow liquid.

$^1\text{H}$  NMR (400 MHz, Chloroform-*d*)  $\delta$  7.70 – 7.64 (m, 3H), 7.39 – 7.37 (m, 1H), 7.26 – 7.20 (m, 4H), 7.15 – 7.11 (m, 2H), 5.15 – 5.08 (m, 2H), 3.94 – 3.88 (m, 4H), 3.85 – 3.81 (m, 1H), 3.72 – 3.67 (m, 1H), 3.54 – 3.44 (m, 1H), 1.59 (d,  $J = 7.2$  Hz, 3H).

$^{13}\text{C}$  NMR (101 MHz, Chloroform-*d*)  $\delta$  174.3, 157.6, 136.8, 135.3, 133.6, 131.8 (d,  $J = 1.6$  Hz), 129.2, 128.9, 128.8, 128.3, 127.1, 126.1 (d,  $J = 1.5$  Hz), 125.9, 125.4 (q,  $J = 280.5$  Hz), 118.9, 105.5, 65.6, 55.2, 50.1 (d,  $J = 2.4$  Hz), 49.7 (q,  $J = 26.7$  Hz), 45.3, 18.4.

$^{19}\text{F}$  NMR (376 MHz, Chloroform-*d*)  $\delta$  -68.29.

HRMS (ESI-TOF)  $m/z$ :  $[\text{M}+\text{Na}]^+$  calcd for  $\text{C}_{24}\text{H}_{22}\text{F}_3\text{N}_3\text{O}_3\text{Na}^+$  480.1505; found 480.1527.

#### 4'-(3-azido-1,1,1-trifluoropropan-2-yl)-[1,1'-biphenyl]-3-yl 2-(4-((2-oxocyclopentyl)methyl)phenyl)propanoate (**32**)

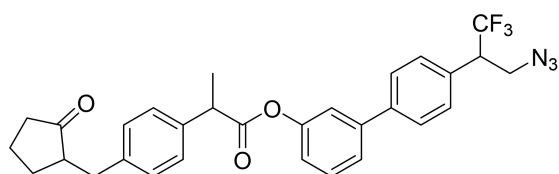

Prepared according to standard conditions. Purification by thin layer chromatography was performed (PE/EA: 100/1) to yield **32** (41.7 mg, 39%) as a yellow oil.

$^1\text{H}$  NMR (400 MHz, Chloroform-*d*)  $\delta$  7.58 – 7.56 (m, 2H), 7.42 – 7.37 (m, 4H), 7.34 – 7.32 (m, 2H), 7.21 – 7.17 (m, 3H), 7.02 – 7.99 (m, 1H), 3.96 (q,  $J = 7.1$  Hz, 1H), 3.92 – 3.88 (m, 1H), 3.81 – 3.76 (m, 1H), 3.63 – 3.52 (m, 1H), 3.15 (dd,  $J = 13.9, 4.0$  Hz, 1H), 2.54 (dd,  $J = 13.8, 9.6$  Hz, 1H), 2.39 – 2.31 (m, 2H), 2.16 – 2.06 (m, 2H), 1.99 – 1.92 (m, 1H), 1.77 – 1.68 (m, 1H), 1.62 (d,  $J = 7.2$  Hz, 3H), 1.59 – 1.51 (m, 1H).

$^{13}\text{C}$  NMR (101 MHz, Chloroform-*d*)  $\delta$  173.0, 151.2, 141.7, 140.8, 139.1, 137.7, 131.4, 129.6, 129.31, 129.30, 127.7, 127.5, 125.5 (d,  $J = 280.2$  Hz), 124.4, 120.5, 120.1, 50.9, 50.1 (d,  $J = 2.6$  Hz), 49.7 (q,  $J = 26.8$  Hz), 45.2, 38.1, 35.1, 29.1, 20.4, 18.4.

$^{19}\text{F}$  NMR (376 MHz, Chloroform-*d*)  $\delta$  -68.28.

HRMS (APCI)  $m/z$ :  $[\text{M}-\text{N}_2+\text{H}]^+$  calcd for  $\text{C}_{30}\text{H}_{29}\text{O}_3\text{F}_3\text{N}^+$  508.2094; found 508.2088.

### dimethyl (2-([1,1'-biphenyl]-4-yl)-3,3,3-trifluoropropyl)phosphoramidate (**33**)

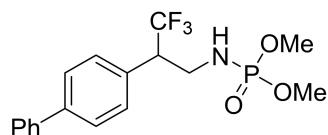

Prepared according to standard conditions. Purification by thin layer chromatography was performed (PE/EA: 1/1) to yield **33** (67.1 mg, 90%) as a white solid, mp: 68 - 72 °C.

$^1\text{H}$  NMR (400 MHz, Chloroform-*d*)  $\delta$  7.60 – 7.55 (m, 4H), 7.45 – 7.42 (m, 2H), 7.37 – 7.33 (m, 3H), 3.66 (d,  $J = 11.1$  Hz, 3H), 3.61 – 3.49 (m, 5H), 3.43 – 3.33 (m, 1H), 2.88 – 2.82 (m, 1H).

$^{13}\text{C}$  NMR (101 MHz, Chloroform-*d*)  $\delta$  141.7, 140.1, 131.2 (d,  $J = 2.0$  Hz), 129.4, 128.8, 127.6, 127.5, 127.0, 125.9 (q,  $J = 280.9$  Hz), 53.0 (dd,  $J = 13.7, 5.6$  Hz), 51.2 (qd,  $J = 25.9, 5.1$  Hz), 40.6.

$^{19}\text{F}$  NMR (376 MHz, Chloroform-*d*)  $\delta$  -68.25.

$^{31}\text{P}$  NMR (162 MHz, Chloroform-*d*)  $\delta$  10.70.

HRMS (ESI-TOF)  $m/z$ :  $[\text{M}+\text{Na}]^+$  calcd for  $\text{C}_{17}\text{H}_{19}\text{F}_3\text{NO}_3\text{PNa}^+$  396.0947; found 396.0958.

### tert-butyl (2-([1,1'-biphenyl]-4-yl)-3,3,3-trifluoropropyl)carbamate (**34**)

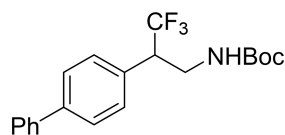

Prepared according to standard conditions. Purification by thin layer chromatography was performed (PE/EA: 2/1) to yield **34** (65.7 mg, 90%) as a white solid, mp: 89 - 93 °C.

$^1\text{H}$  NMR (400 MHz, Chloroform-*d*)  $\delta$  7.60 – 7.56 (m, 4H), 7.45 – 7.42 (m, 2H), 7.37 – 7.35 (m, 3H), 4.64 (s, 1H), 3.89 – 3.84 (m, 1H), 3.71 – 3.65 (m, 1H), 3.55 – 3.48 (m, 1H), 1.40 (s, 9H).

$^{13}\text{C}$  NMR (101 MHz, Chloroform-*d*)  $\delta$  155.6, 141.5, 140.3, 131.8, 129.4, 128.8, 127.6, 127.6, 127.1, 126.2 (q,  $J = 280.6$  Hz), 79.9, 49.5 (q,  $J = 25.4$  Hz), 40.2, 28.3.

$^{19}\text{F}$  NMR (376 MHz, Chloroform-*d*)  $\delta$  -68.06.

HRMS (ESI-TOF)  $m/z$ :  $[\text{M}+\text{Na}]^+$  calcd for  $\text{C}_{20}\text{H}_{22}\text{F}_3\text{NO}_2\text{Na}^+$  388.1495; found 388.1506.

### dimethyl 1-(2-([1,1'-biphenyl]-4-yl)-3,3,3-trifluoropropyl)-1H-1,2,3-triazole-4,5-dicarboxylate (**35**)

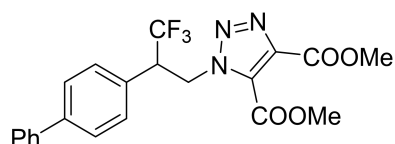

Prepared according to standard conditions. Purification by thin layer chromatography was performed (PE/EA: 5/1) to yield **35** (68.4 mg, 79%) as a yellow liquid.

$^1\text{H}$  NMR (400 MHz, Chloroform-*d*)  $\delta$  7.55 – 7.53 (m, 4H), 7.45 – 7.41 (m, 2H), 7.37 – 7.33 (m, 1H), 7.29 – 7.27 (m, 2H), 5.21 (qd,  $J$  = 13.9, 7.7 Hz, 2H), 4.25 – 4.14 (m, 1H), 3.92 (s, 3H), 3.87 (s, 3H).

$^{13}\text{C}$  NMR (101 MHz, Chloroform-*d*)  $\delta$  160.0, 158.5, 142.0, 139.8, 130.1, 129.2, 129.0, 128.7, 127.71, 127.70, 127.63, 126.9, 125.2 (q,  $J$  = 280.5 Hz), 53.3, 52.6, 50.2 (q,  $J$  = 27.6 Hz), 49.0 (d,  $J$  = 2.7 Hz).

$^{19}\text{F}$  NMR (376 MHz, Chloroform-*d*)  $\delta$  -68.09.

HRMS (ESI-TOF)  $m/z$ :  $[\text{M}+\text{Na}]^+$  calcd for  $\text{C}_{21}\text{H}_{18}\text{F}_3\text{N}_3\text{O}_4\text{Na}^+$  456.1142; found 456.1154.

### 1-(2-((1,1'-biphenyl)-4-yl)-3,3,3-trifluoropropyl)-1H-benzo[d][1,2,3]triazole (**36**)

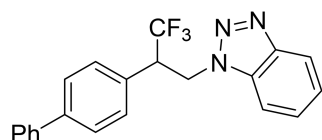

Prepared according to standard conditions. Purification by thin layer chromatography was performed (PE/EA: 5/1) to yield **36** (55.1 mg, 75%) as a white solid, mp: 105 - 109 °C.

$^1\text{H}$  NMR (400 MHz, Chloroform-*d*)  $\delta$  7.99 (d,  $J$  = 8.3 Hz, 1H), 7.49 – 7.46 (m, 4H), 7.42 – 7.25 (m, 8H), 5.27 (dd,  $J$  = 14.3, 5.5 Hz, 1H), 5.04 (dd,  $J$  = 14.3, 9.2 Hz, 1H), 4.30 – 4.19 (m, 1H).

$^{13}\text{C}$  NMR (101 MHz, Chloroform-*d*)  $\delta$  145.6, 141.9, 139.9, 133.0, 130.2 (d,  $J$  = 1.3 Hz), 129.0, 128.7, 127.6, 127.6, 127.5, 126.9, 123.9, 125.6 (q,  $J$  = 280.3 Hz), 120.0, 108.7, 50.2 (q,  $J$  = 26.9 Hz), 47.5 (d,  $J$  = 2.8 Hz).

$^{19}\text{F}$  NMR (376 MHz, Chloroform-*d*)  $\delta$  -68.05.

HRMS (ESI-TOF)  $m/z$ :  $[\text{M}+\text{Na}]^+$  calcd for  $\text{C}_{21}\text{H}_{16}\text{F}_3\text{N}_3\text{Na}^+$  390.1189; found 390.1193.

### ethyl 1-(2-((1,1'-biphenyl)-4-yl)-3,3,3-trifluoropropyl)-1H-tetrazole-5-carboxylate (**37**)

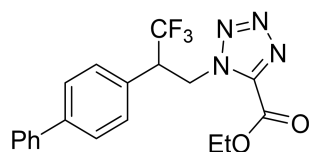

Prepared according to standard conditions. Purification by thin layer chromatography was performed (PE/EA: 5/1) to yield **37** (40.6 mg, 52%) as a white solid, mp: 75 - 79 °C.

$^1\text{H}$  NMR (400 MHz, Chloroform-*d*)  $\delta$  7.55 – 7.53 (m, 4H), 7.44 (t,  $J$  = 7.4 Hz, 2H), 7.38 – 7.35 (m, 1H), 7.31 – 7.29 (m, 2H), 5.41 – 5.30 (m, 2H), 4.53 – 4.41 (m, 2H), 4.28 – 4.17 (m, 1H), 1.41 (t,  $J$  = 7.2 Hz, 3H).

$^{13}\text{C}$  NMR (101 MHz, Chloroform-*d*)  $\delta$  156.3, 145.8, 142.3, 139.7, 129.2, 128.8, 128.6, 127.8, 127.7, 127.0, 125.2 (q,  $J$  = 280.5 Hz), 63.8, 49.9 (q,  $J$  = 27.6 Hz), 48.0 (d,  $J$  = 2.8 Hz), 13.8.

$^{19}\text{F}$  NMR (376 MHz, Chloroform-*d*)  $\delta$  -68.15.

HRMS (ESI-TOF)  $m/z$ :  $[\text{M}+\text{Na}]^+$  calcd for  $\text{C}_{19}\text{H}_{17}\text{F}_3\text{N}_4\text{O}_2\text{Na}^+$  413.1196; found 413.1203.

**1-(2-([1,1'-biphenyl]-4-yl)-3,3,3-trifluoropropyl)-5-amino-1H-1,2,3-triazole-4-carbonitrile (38)**

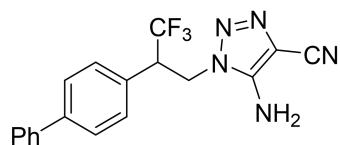

Prepared according to standard conditions. Purification by thin layer chromatography was performed (PE/EA: 2/1) to yield **38** (33.0 mg, 46%) as a white solid, mp: 189 - 193 °C.

<sup>1</sup>H NMR (400 MHz, DMSO-*d*<sub>6</sub>) δ 7.71 – 7.68 (m, 4H), 7.57 – 7.55 (m, 2H), 7.47 (t, *J* = 7.6 Hz, 2H), 7.40 – 7.36 (m, 1H), 7.21 (s, 2H), 4.93 – 4.88 (m, 1H), 4.84 – 4.78 (m, 1H), 4.54 – 4.43 (m, 1H).

<sup>13</sup>C NMR (101 MHz, DMSO-*d*<sub>6</sub>) δ 148.3, 140.6, 139.2, 130.4, 129.9, 129.0, 127.8, 126.9, 126.7, 125.9 (q, *J* = 280.7 Hz), 113.5, 100.9, 47.0 (q, *J* = 26.8, 26.1 Hz), 44.1.

<sup>19</sup>F NMR (376 MHz, DMSO-*d*<sub>6</sub>) δ -67.17.

HRMS (ESI-TOF) *m/z*: [M+Na]<sup>+</sup> calcd for C<sub>18</sub>H<sub>14</sub>F<sub>3</sub>N<sub>5</sub>Na<sup>+</sup> 380.1094; found 380.1102.

## 8. References

- [1] Y. Liu, Y. Zhou, Y. Zhao and J. Qu, *Org. Lett.*, **2017**, *19*, 946-949.
- [2] S. Meyer, J. Häfliger, M. Schäfer, J. J. Molloy, C. G. Daniliuc and R. Gilmour, *Angew. Chem. Int. Ed.*, **2021**, *60*, 6430-6434.
- [3] W. Chen, S. Ni, Y. Wang and Y. Pan, *Org. Lett.*, **2022**, *24*, 3647-3651.
- [4] Z. Cai, R. Gu, W. Si, Y. Xiang, J. Sun, Y. Jiao and X. Zhang, *Green Chem.*, **2022**, *24*, 6830-6835.
- [5] M. A. Cismesia and T. P. Yoon, *Chem. Sci.*, **2015**, *6*, 5426-5434; L. Buzzetti, G. E. M. Crisenza and P. Melchiorre, *Angew. Chem. Int. Ed.*, **2019**, *58*, 3730-3747.
- [6] X. Li, P. Chen and G. Liu, *Sci. China Chem.*, **2019**, *62*, 1537-1541.
- [7] Y. Liang and X. Zhao, *ACS Catal.*, **2019**, *9*, 6896-6902.
- [8] Z.-K. Xue, N.-K. Fu and S.-Z. Luo, *Chin. Chem. Lett.*, **2017**, *28*, 1083-1086.
- [9] X. G. Yang, F. H. Du, J. J. Li and C. Zhang, *Chem. - Eur. J.*, **2022**, *28*, e202200272.
- [10] Y. Ning, P. Sivaguru, G. Zanoni, E. A. Anderson and X. Bi, *Chem*, **2020**, *6*, 486-496.

## 9. NMR spectra

$^1\text{H}$  (400 MHz,  $\text{CDCl}_3$ ),  $^{13}\text{C}$  (101 MHz,  $\text{CDCl}_3$ ) and  $^{19}\text{F}$  (376 MHz,  $\text{CDCl}_3$ ) NMR spectrum of compound **11**

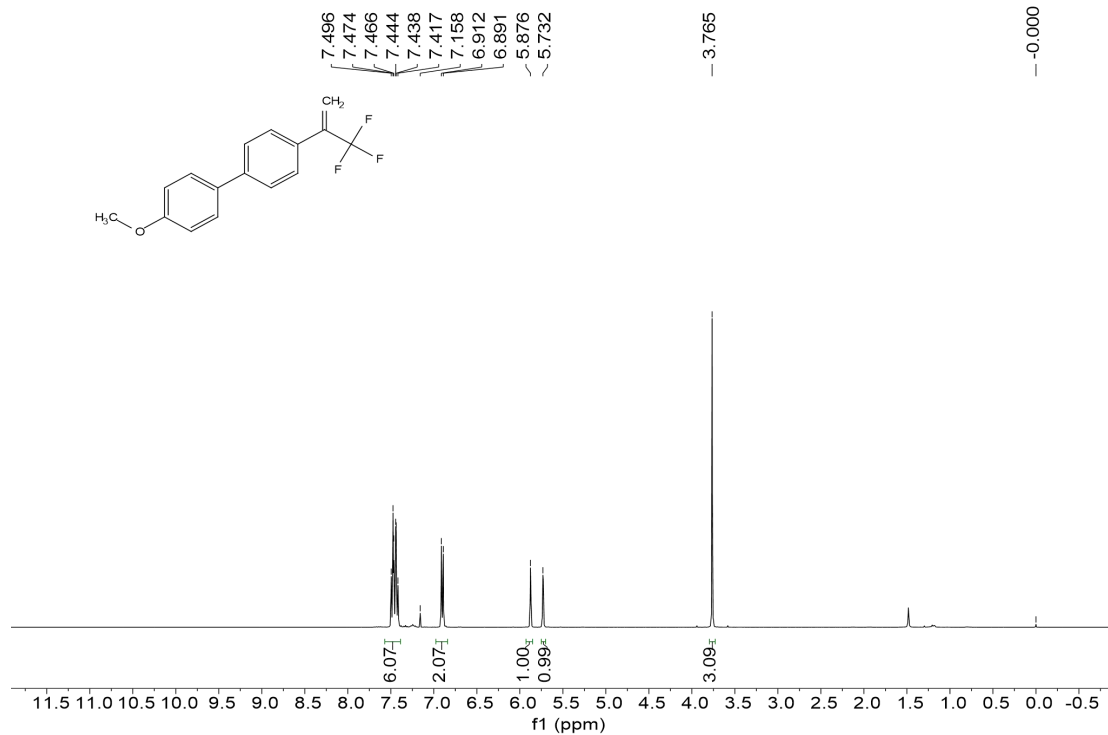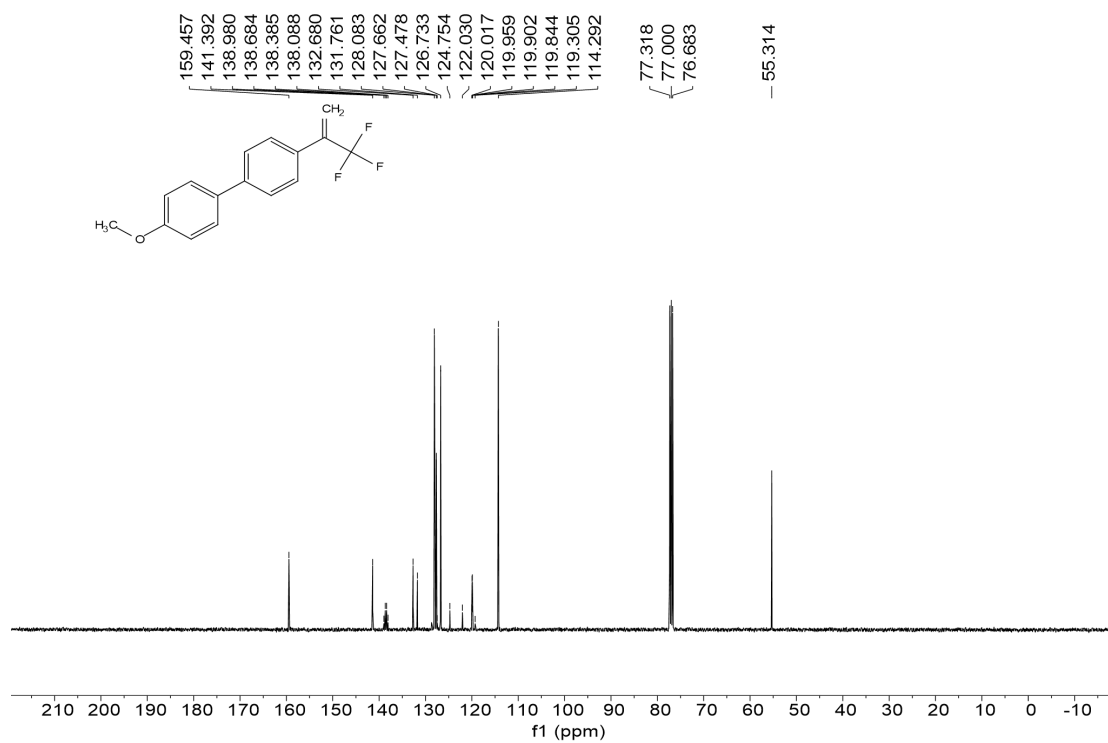



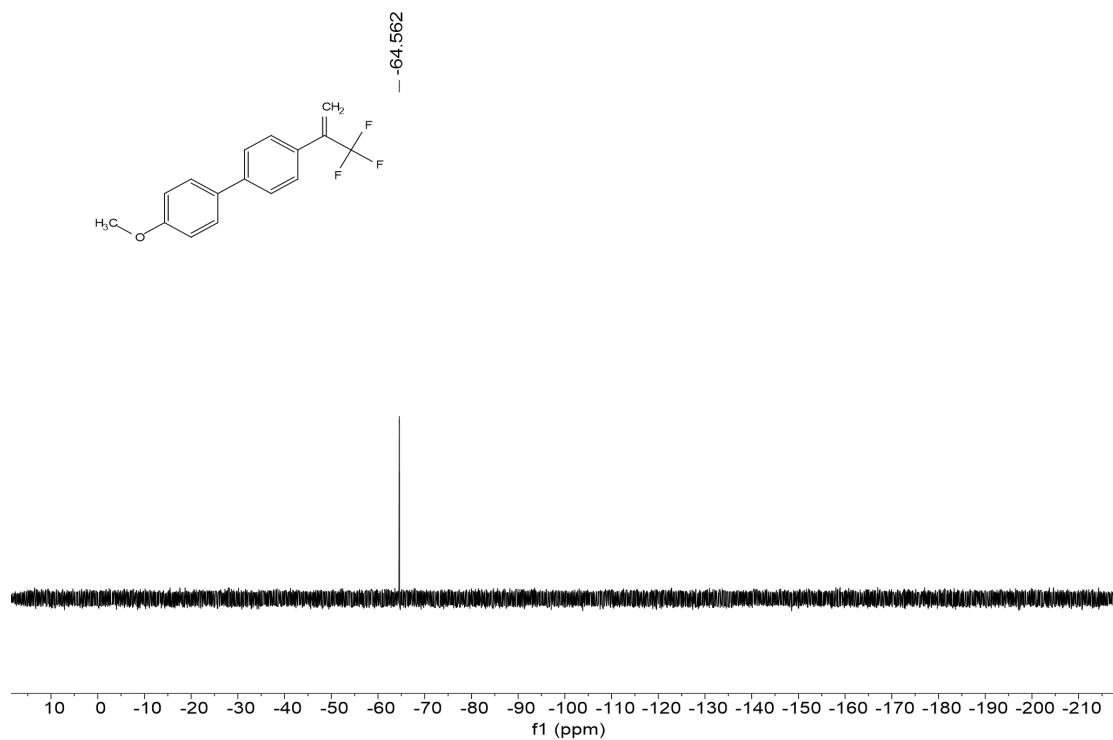

$^1\text{H}$  (400 MHz,  $\text{CDCl}_3$ ),  $^{13}\text{C}$  (101 MHz,  $\text{CDCl}_3$ ) and  $^{19}\text{F}$  (376 MHz,  $\text{CDCl}_3$ ) NMR spectrum of compound **1m**

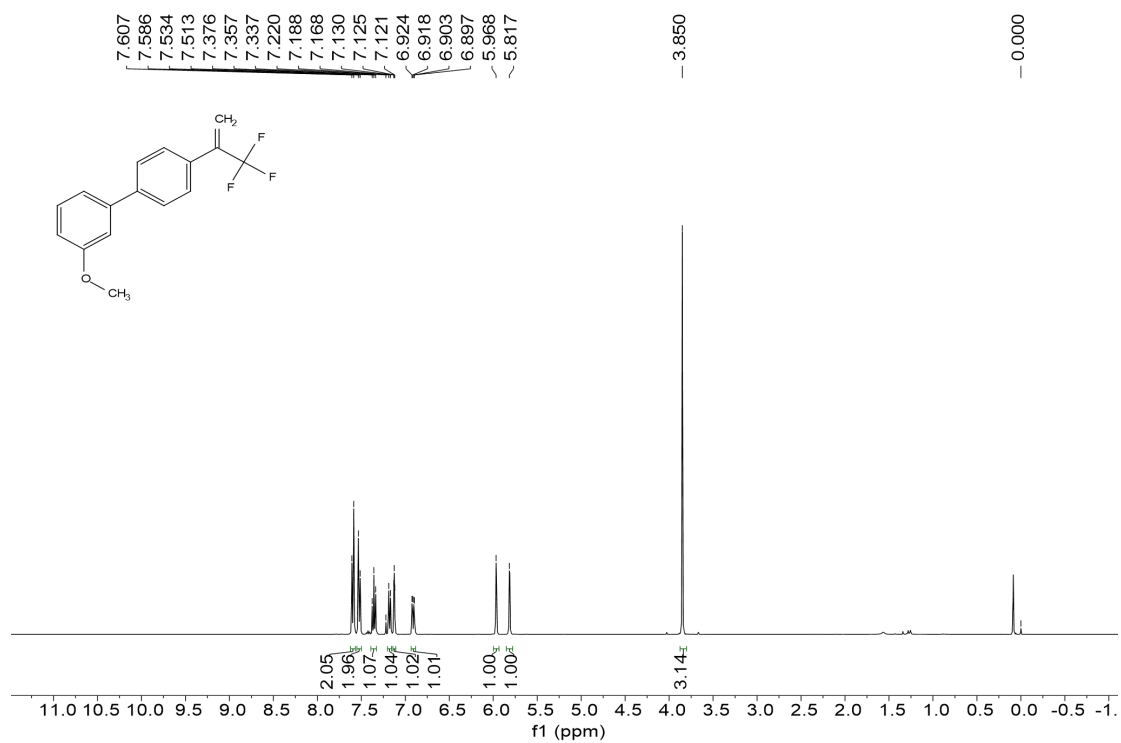

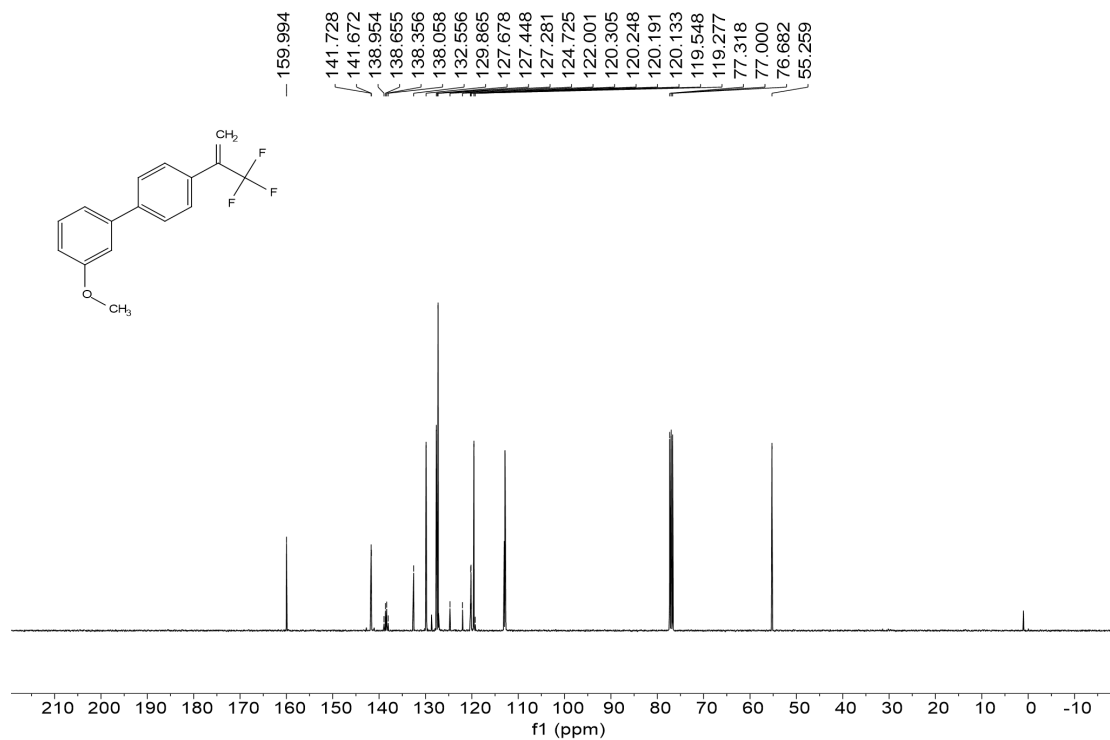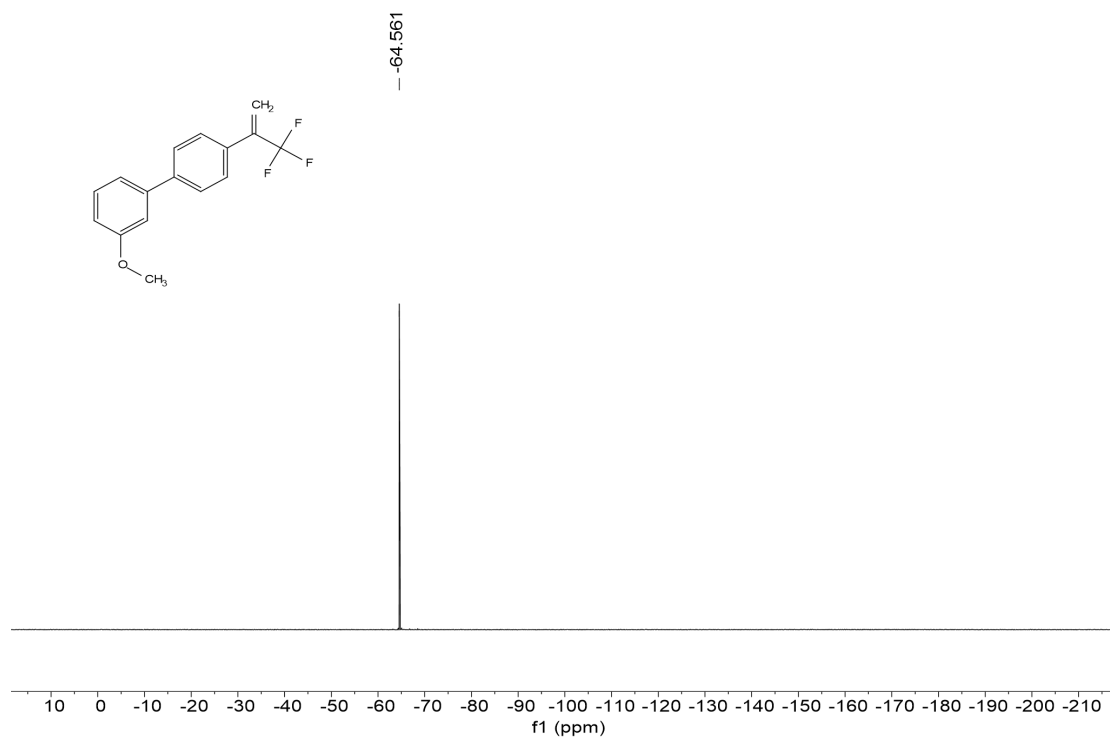

$^1\text{H}$  (400 MHz,  $\text{CDCl}_3$ ),  $^{13}\text{C}$  (101 MHz,  $\text{CDCl}_3$ ) and  $^{19}\text{F}$  (376 MHz,  $\text{CDCl}_3$ ) NMR spectrum of compound **1n**

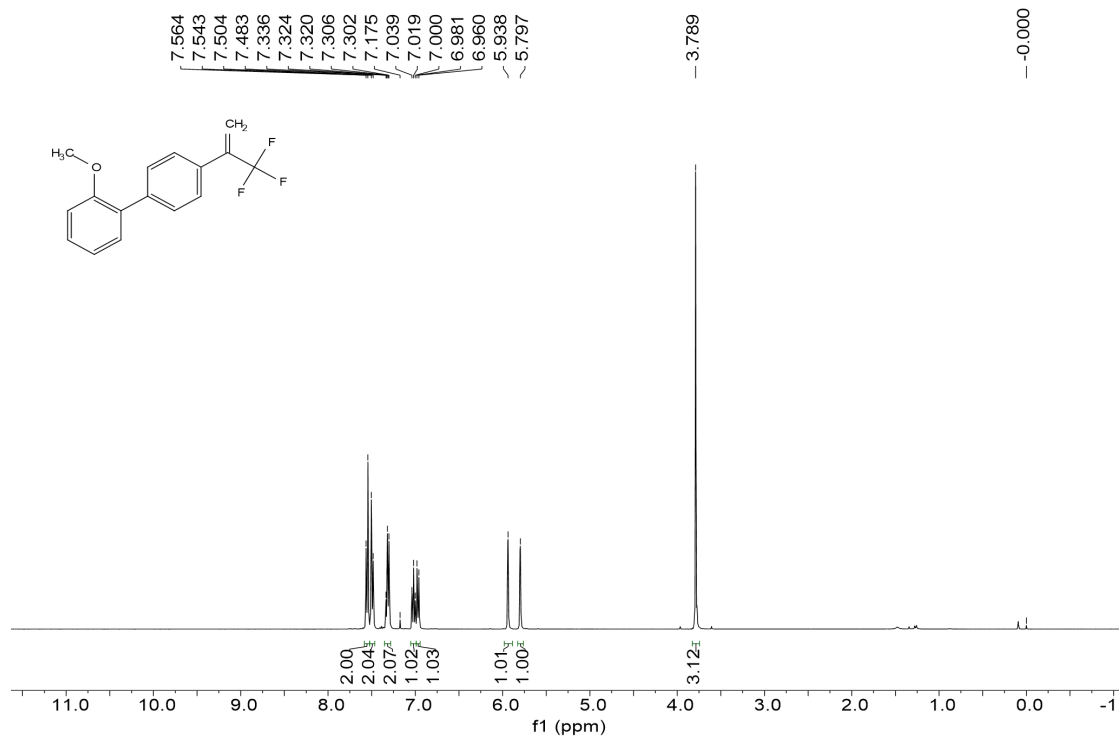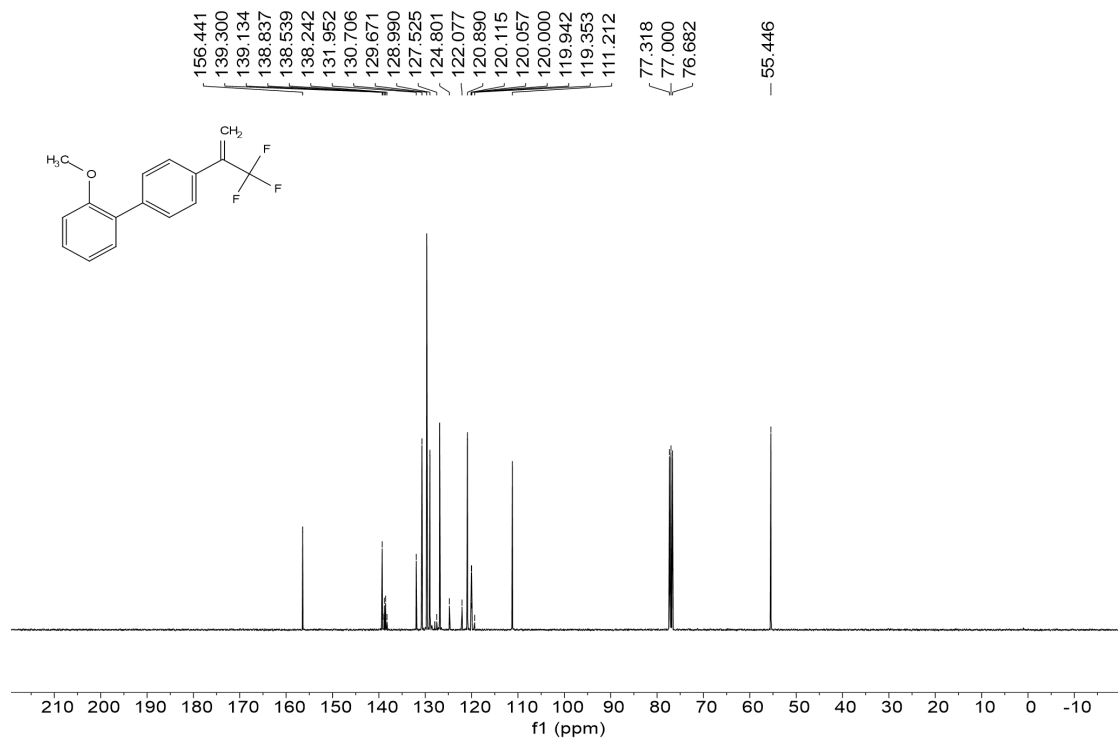

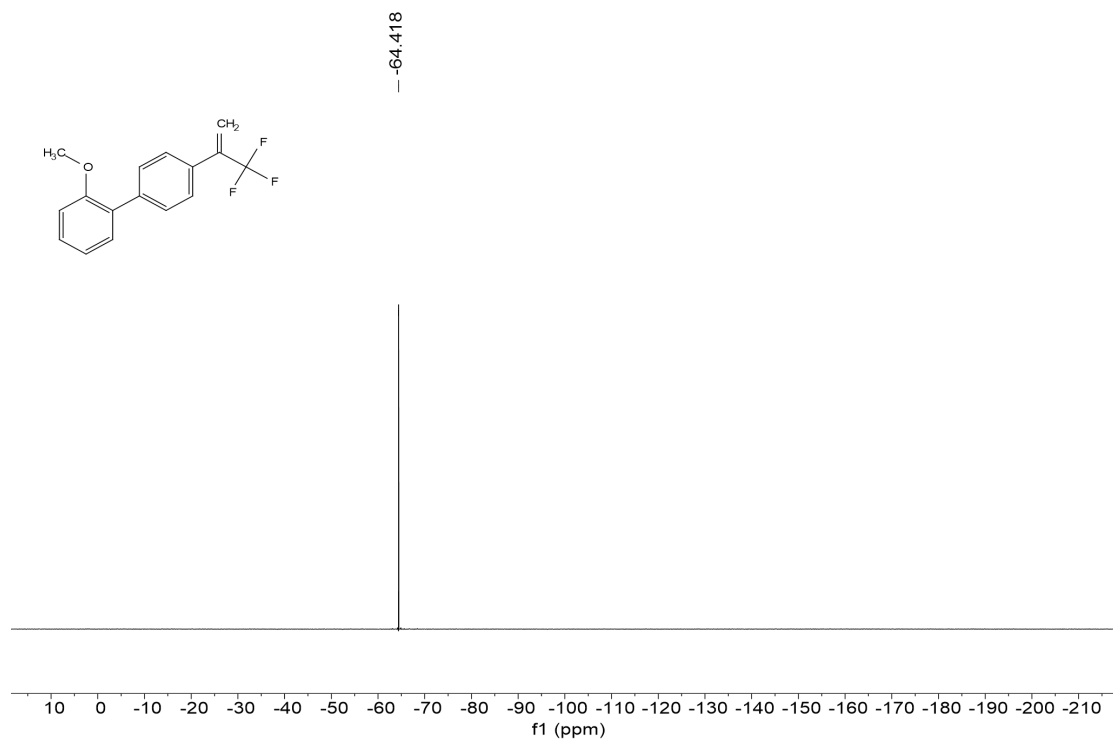

$^1\text{H}$  (400 MHz,  $\text{CDCl}_3$ ),  $^{13}\text{C}$  (101 MHz,  $\text{CDCl}_3$ ) and  $^{19}\text{F}$  (376 MHz,  $\text{CDCl}_3$ ) NMR spectrum of compound **1o**

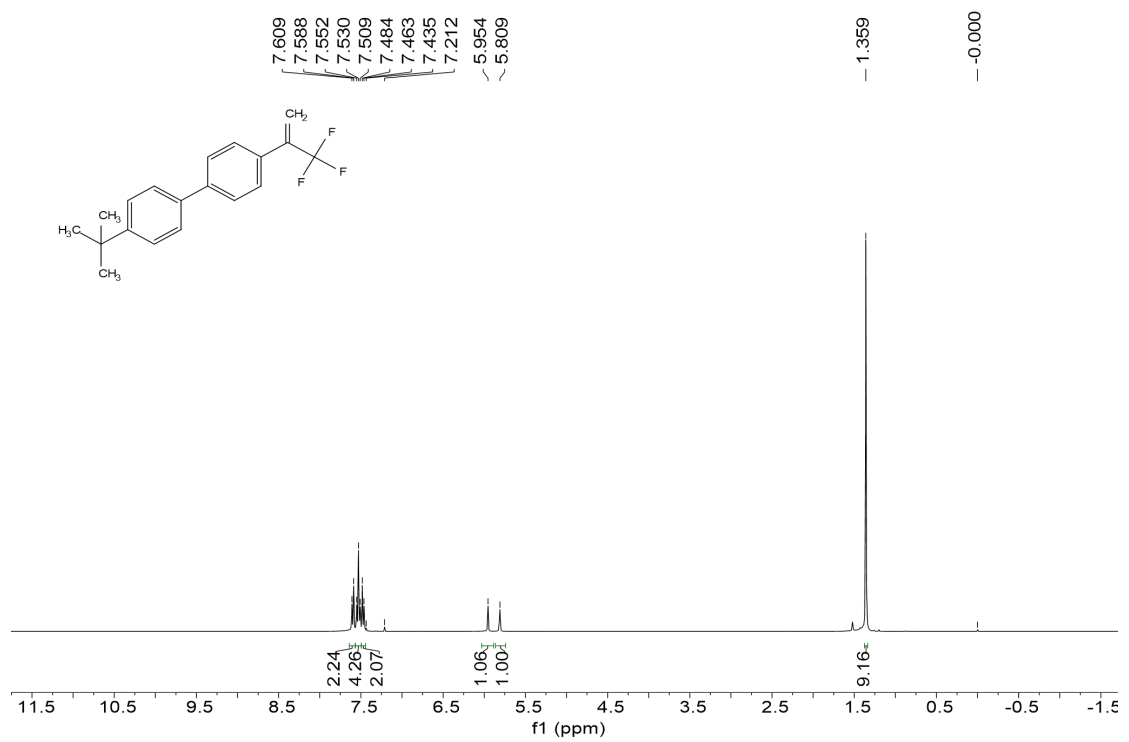

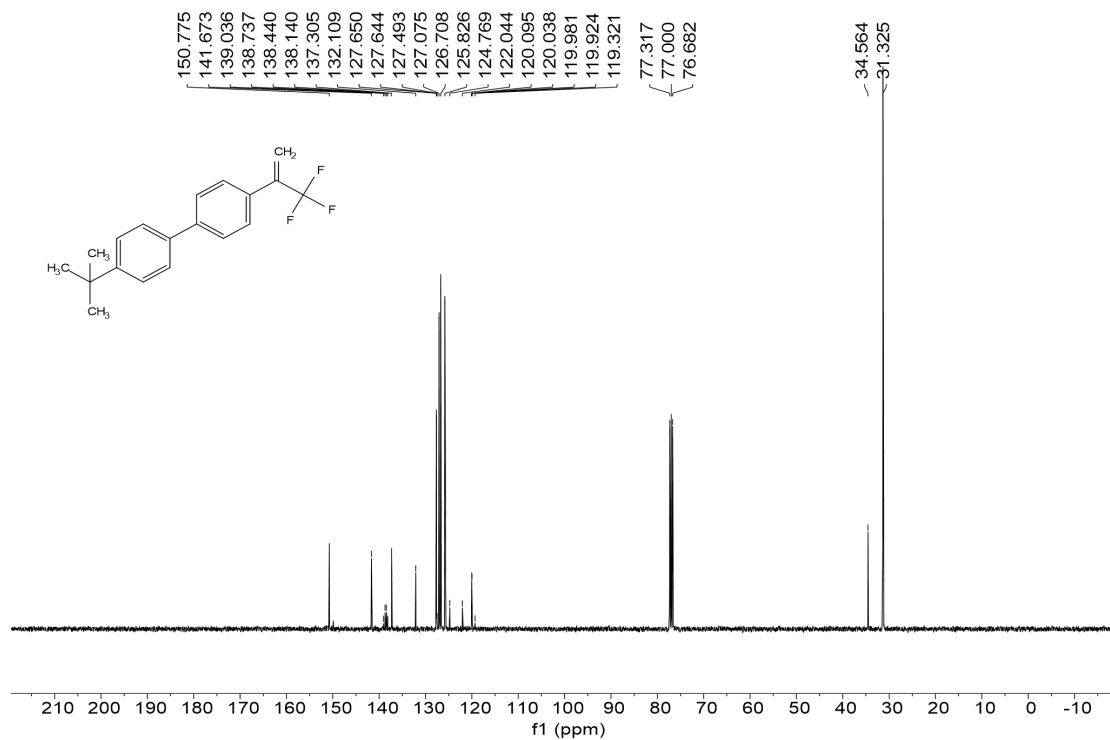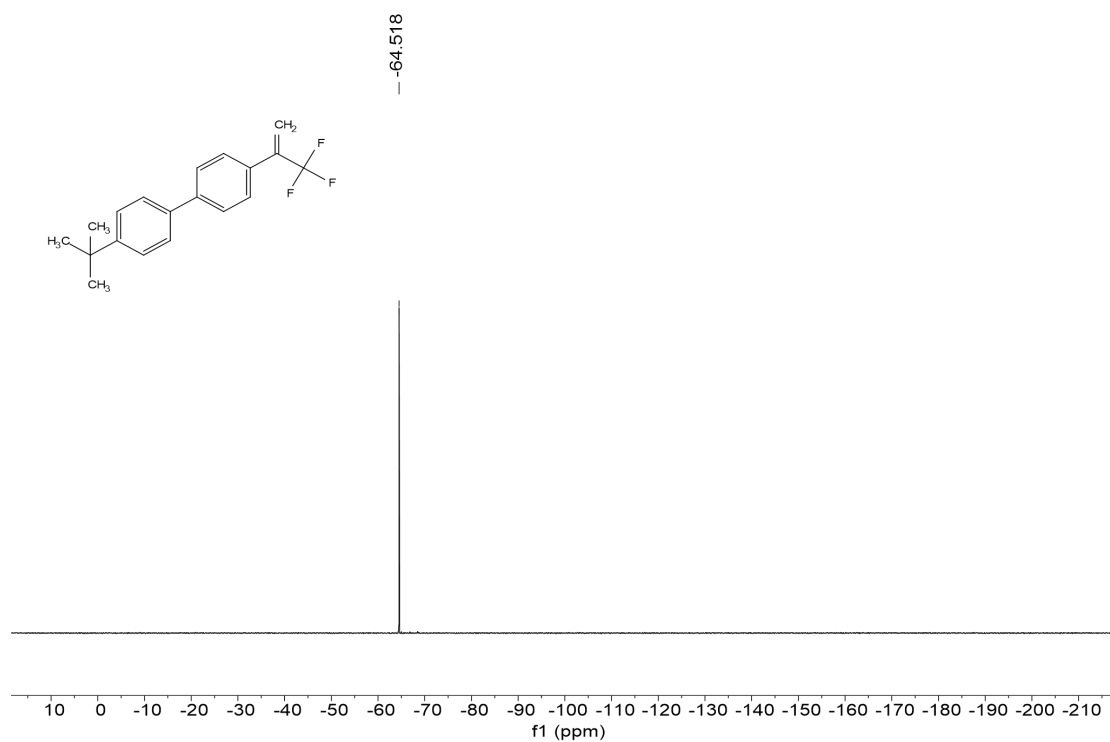

$^1\text{H}$  (400 MHz,  $\text{CDCl}_3$ ),  $^{13}\text{C}$  (101 MHz,  $\text{CDCl}_3$ ) and  $^{19}\text{F}$  (376 MHz,  $\text{CDCl}_3$ ) NMR spectrum of compound **1p**

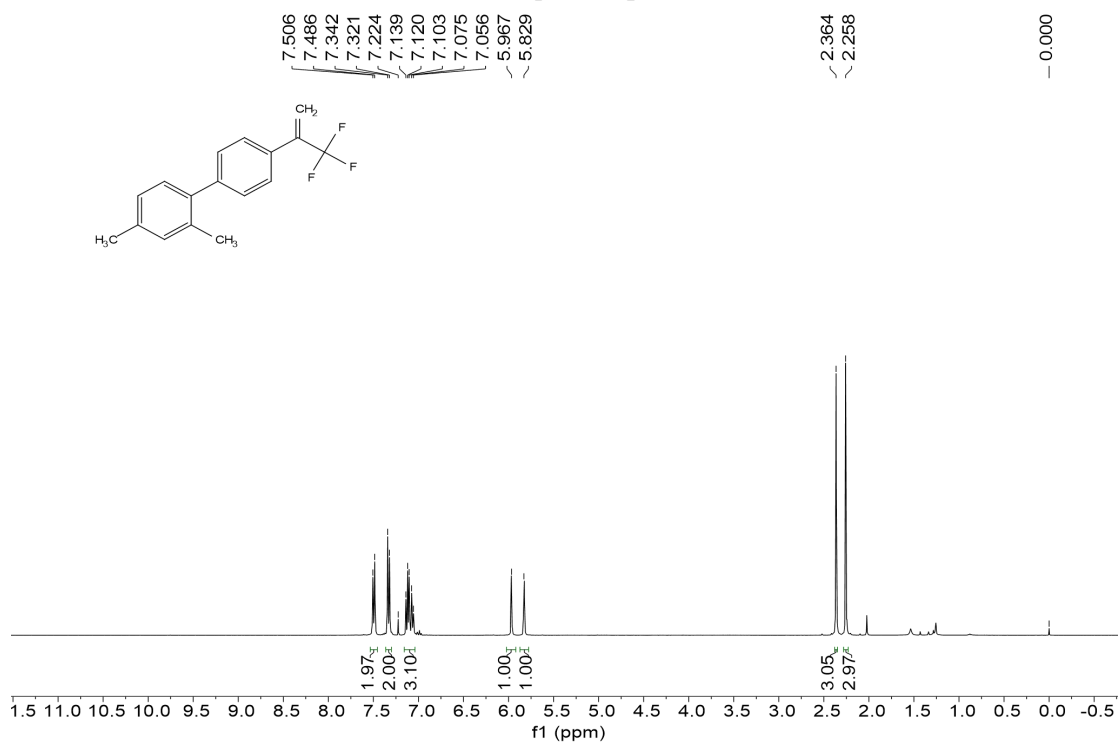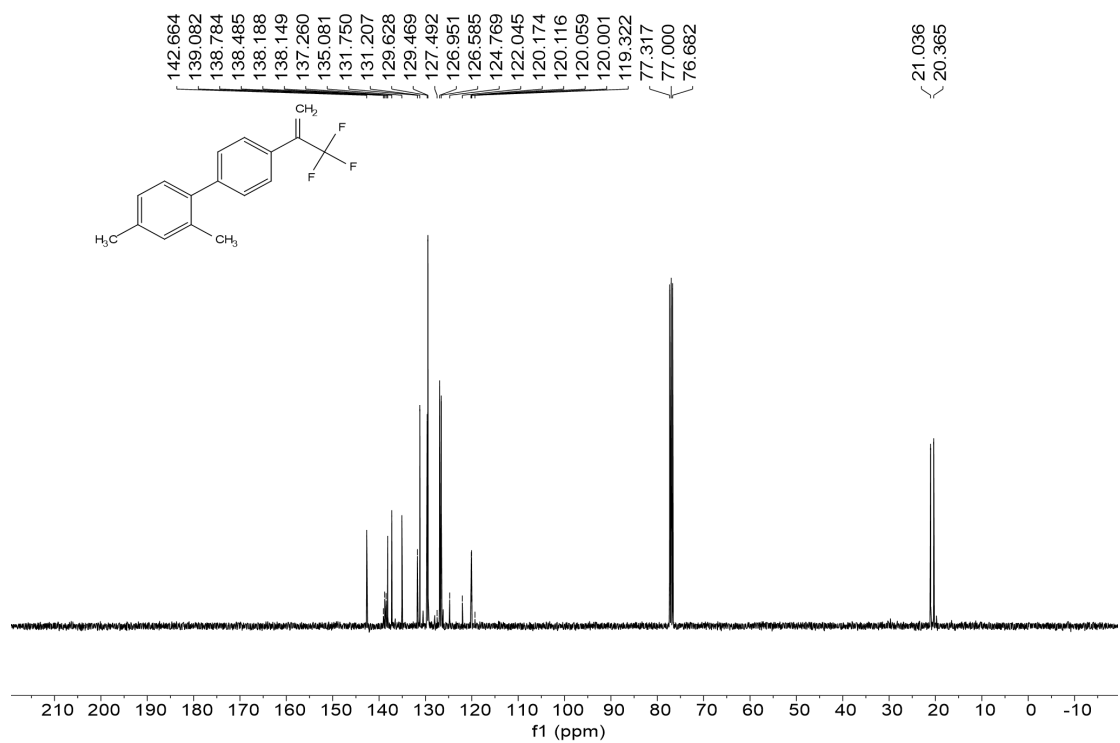

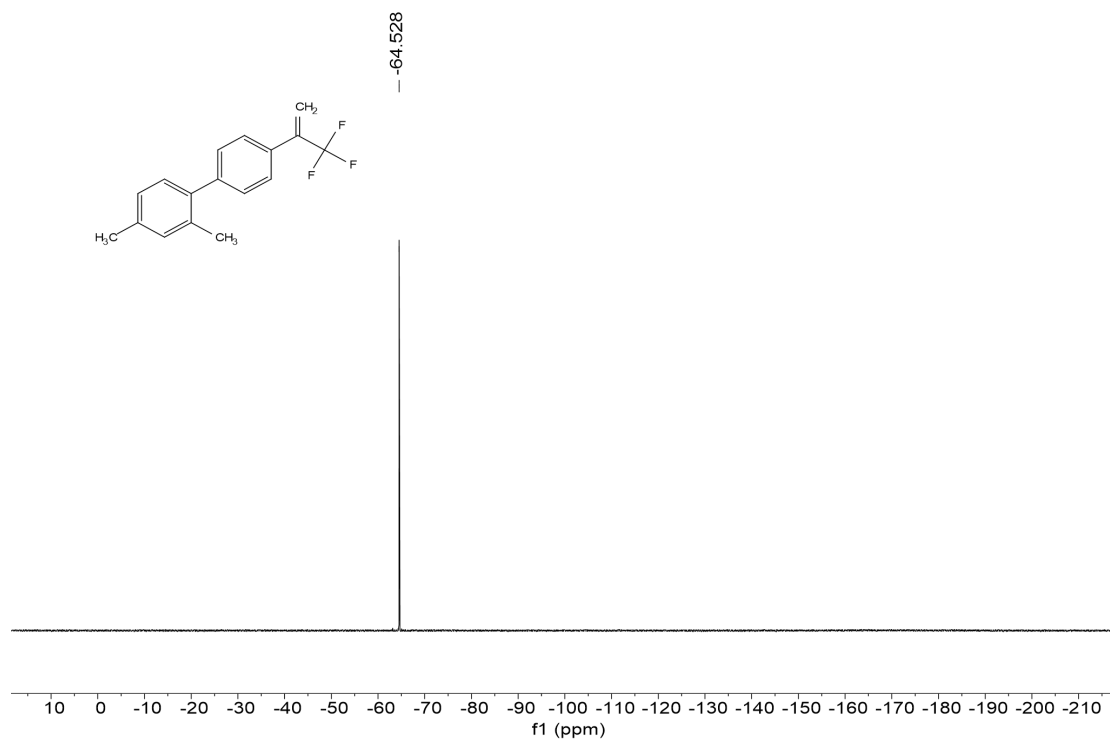

$^1\text{H}$  (400 MHz,  $\text{CDCl}_3$ ),  $^{13}\text{C}$  (101 MHz,  $\text{CDCl}_3$ ) and  $^{19}\text{F}$  (376 MHz,  $\text{CDCl}_3$ ) NMR spectrum of compound **1q**

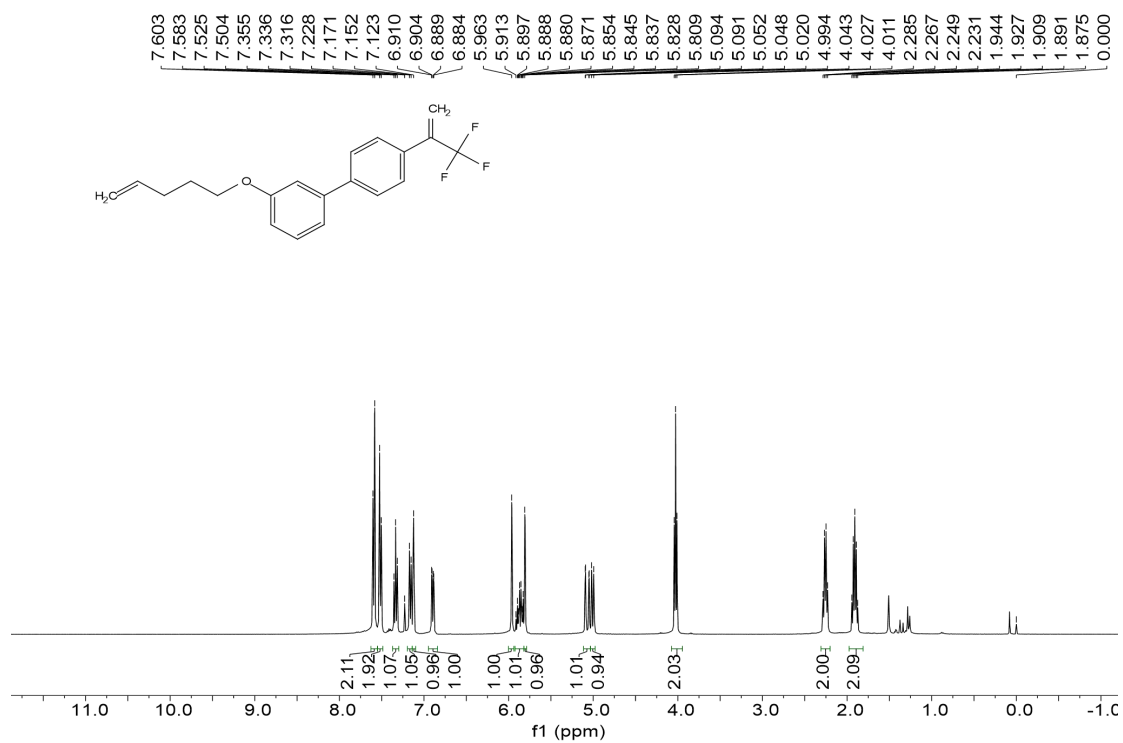

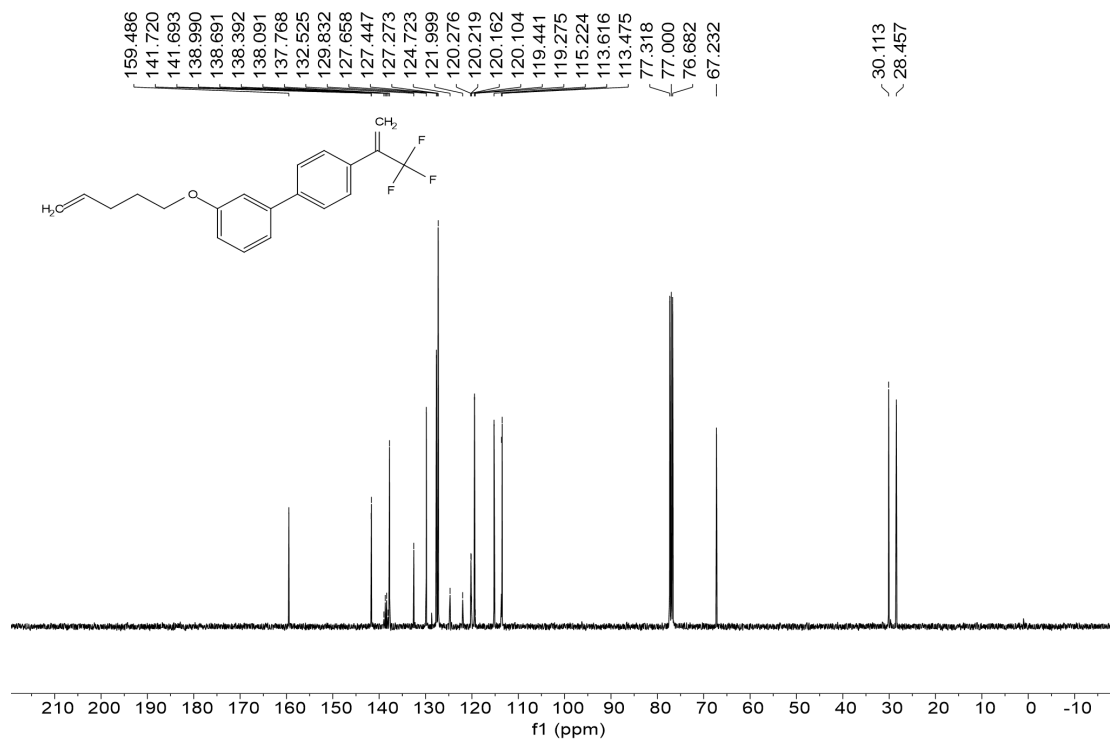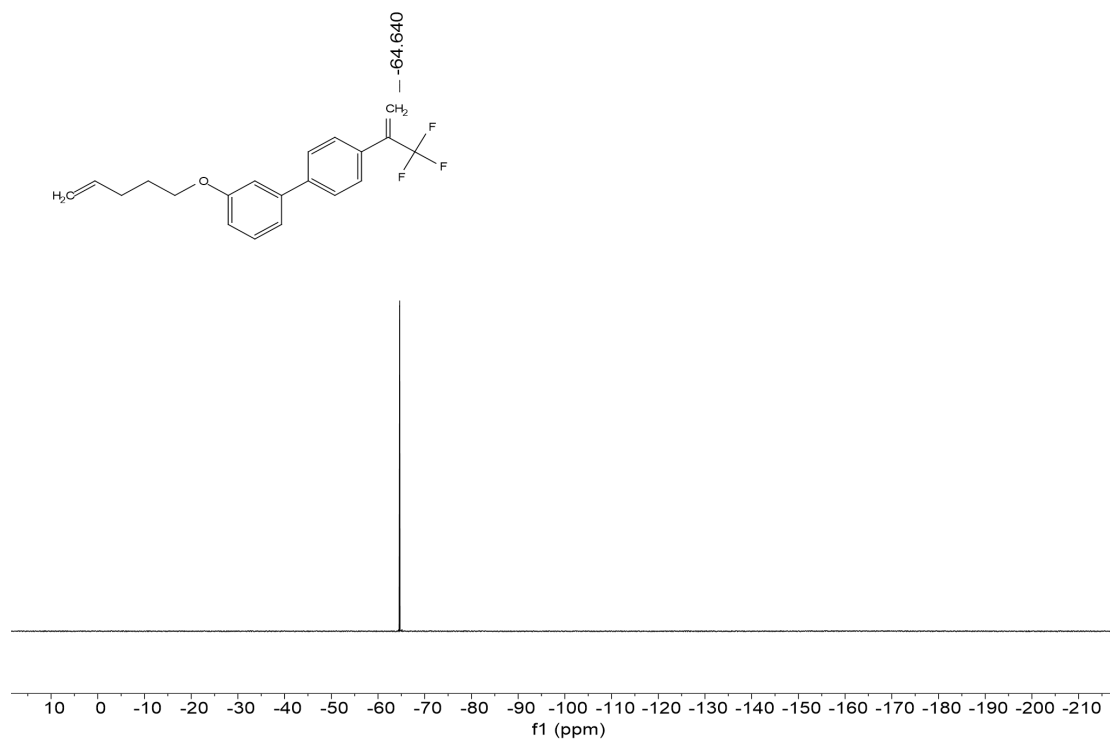



$^1\text{H}$  (400 MHz,  $\text{CDCl}_3$ ),  $^{13}\text{C}$  (101 MHz,  $\text{CDCl}_3$ ) and  $^{19}\text{F}$  (376 MHz,  $\text{CDCl}_3$ ) NMR spectrum of compound **S2**

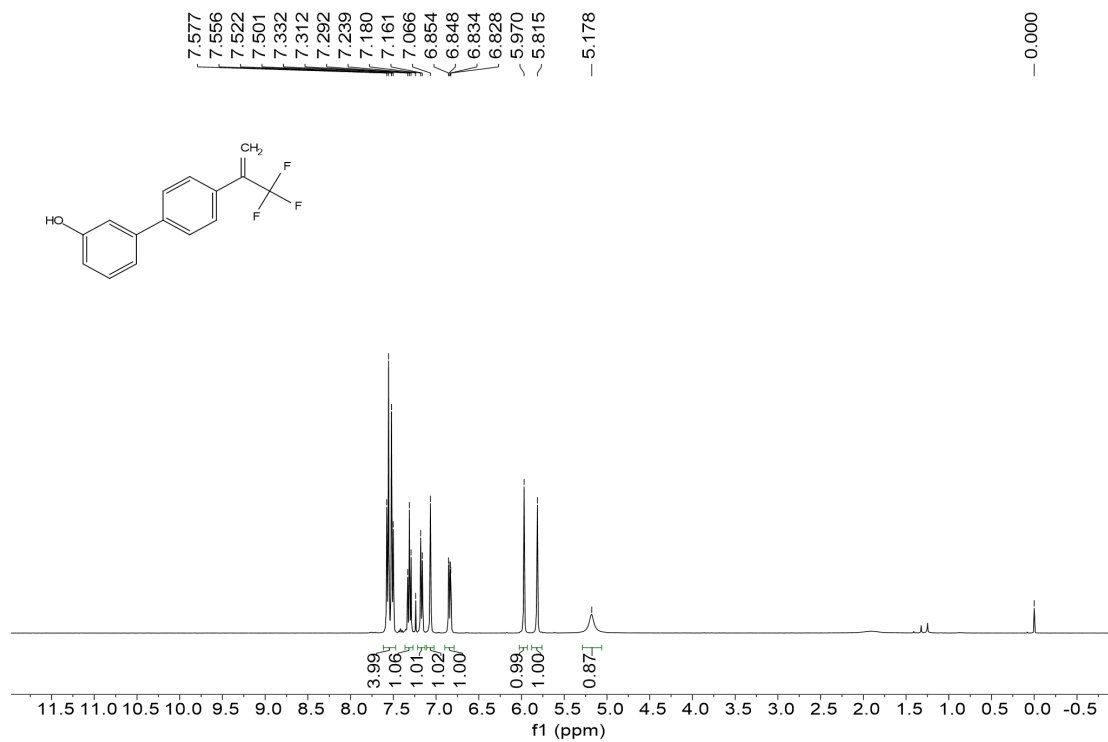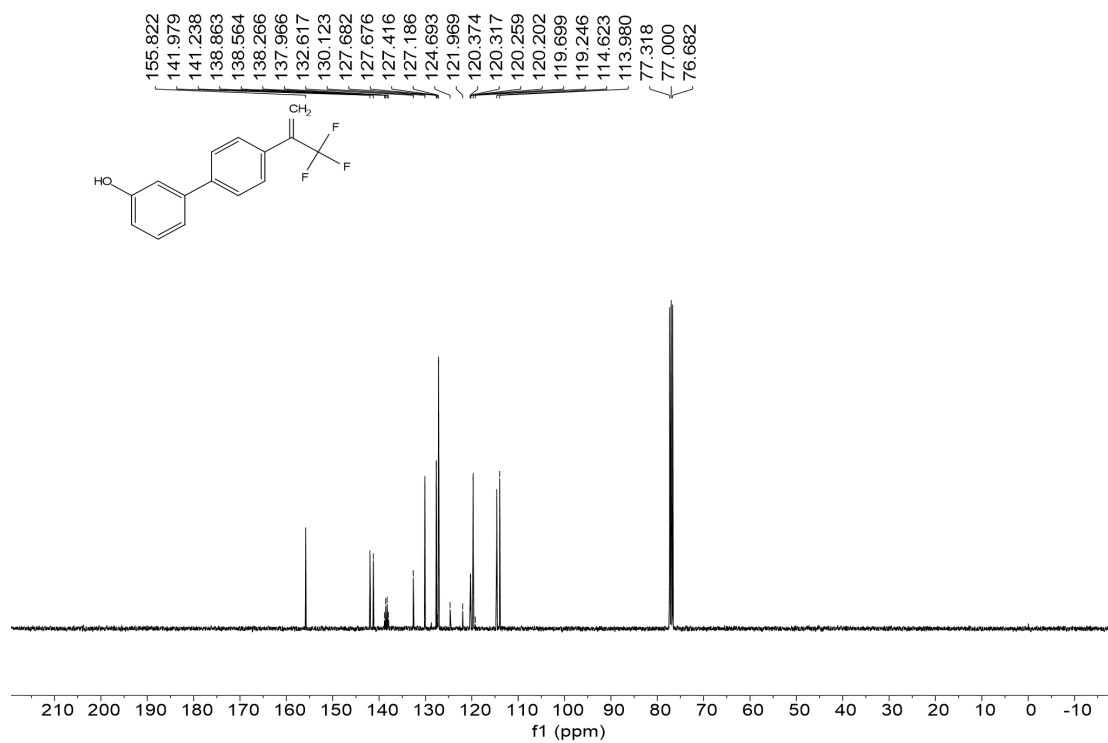

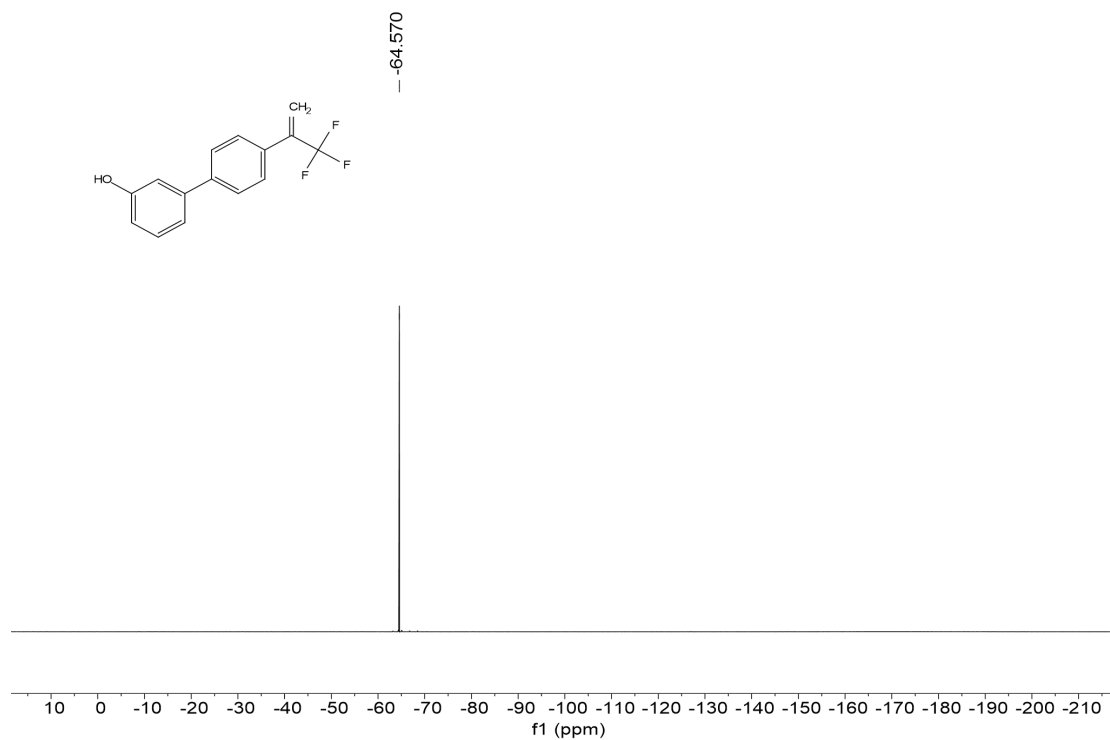

$^1\text{H}$  (400 MHz,  $\text{CDCl}_3$ ),  $^{13}\text{C}$  (101 MHz,  $\text{CDCl}_3$ ) and  $^{19}\text{F}$  (376 MHz,  $\text{CDCl}_3$ ) NMR spectrum of compound S3

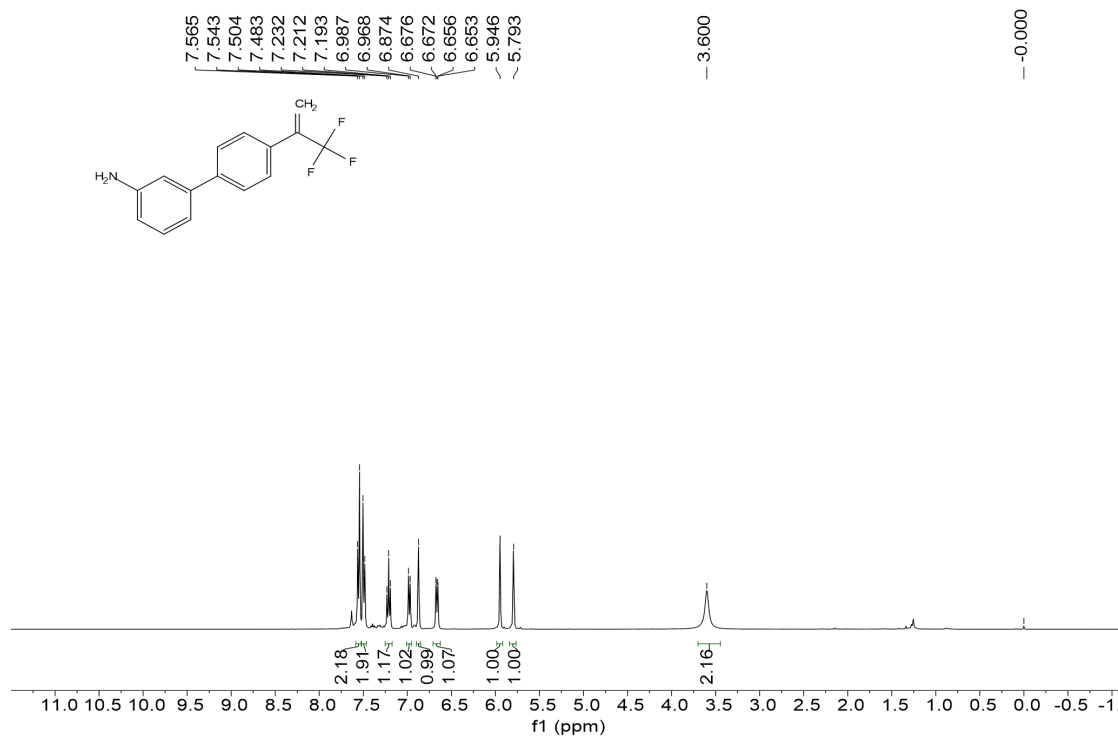

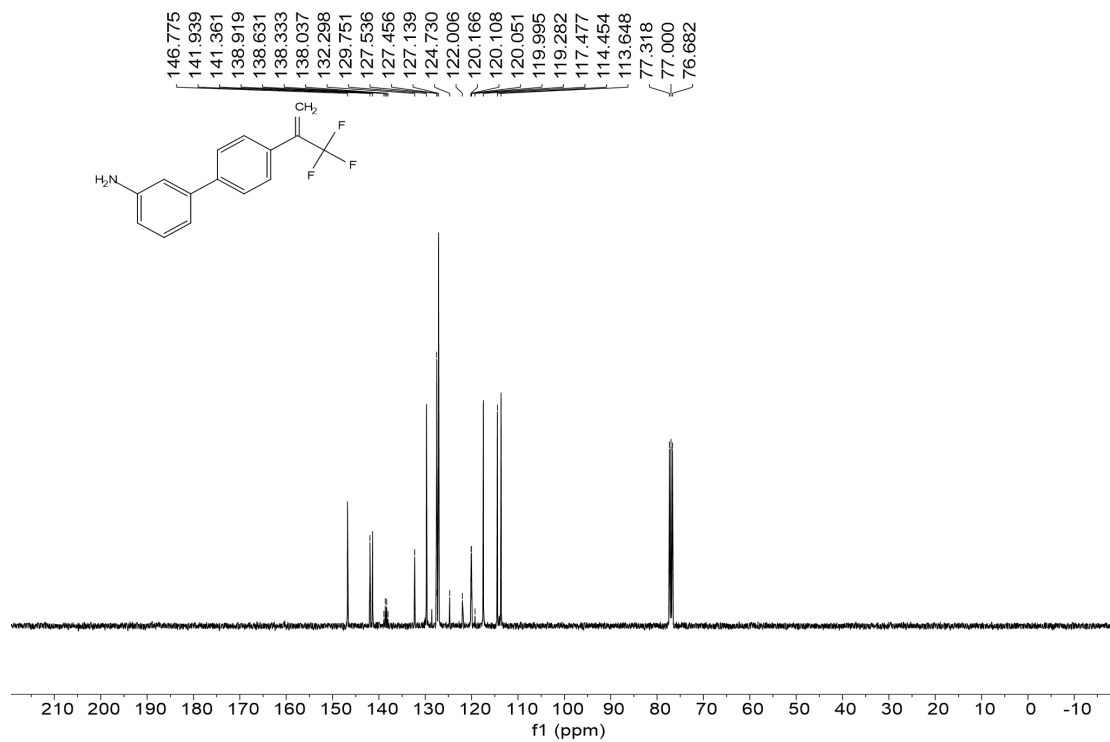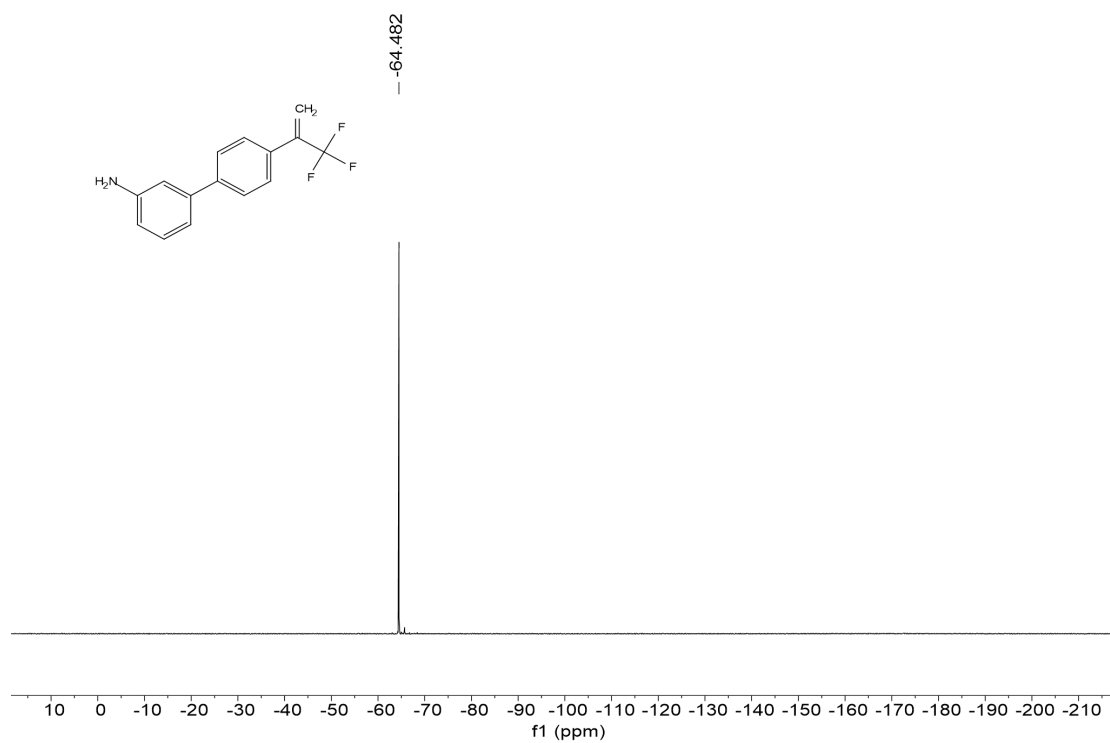

$^1\text{H}$  (400 MHz,  $\text{CDCl}_3$ ),  $^{13}\text{C}$  (101 MHz,  $\text{CDCl}_3$ ) and  $^{19}\text{F}$  (376 MHz,  $\text{CDCl}_3$ ) NMR spectrum of compound **1w**

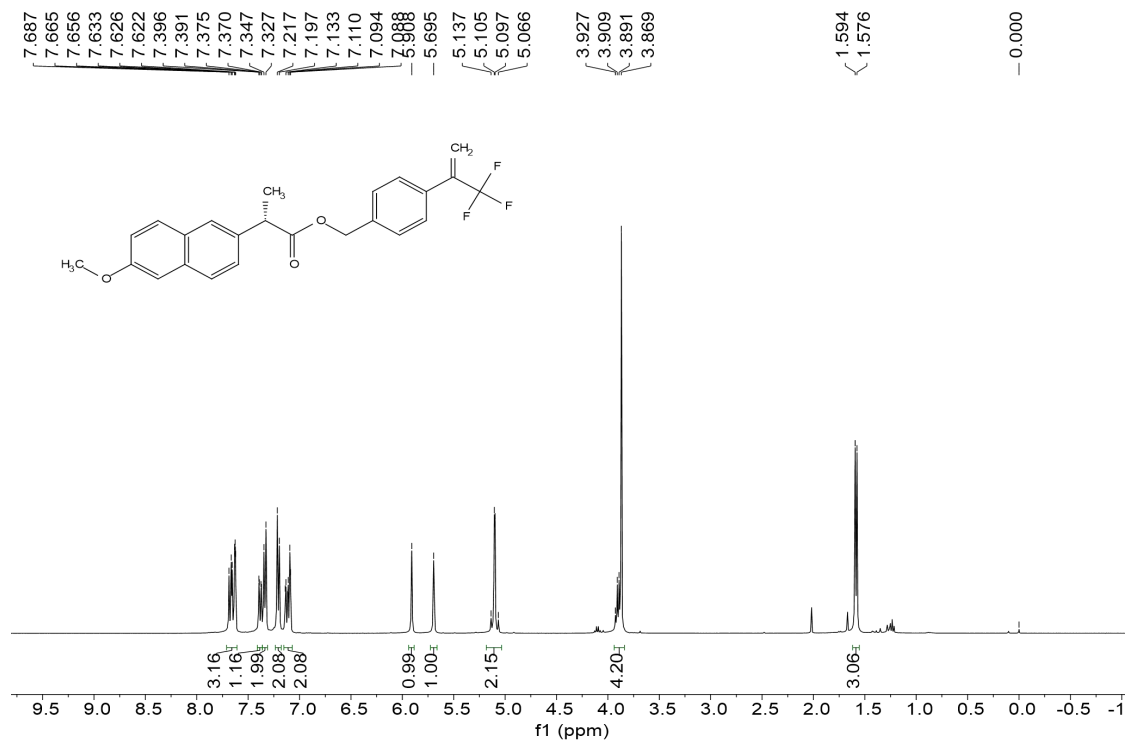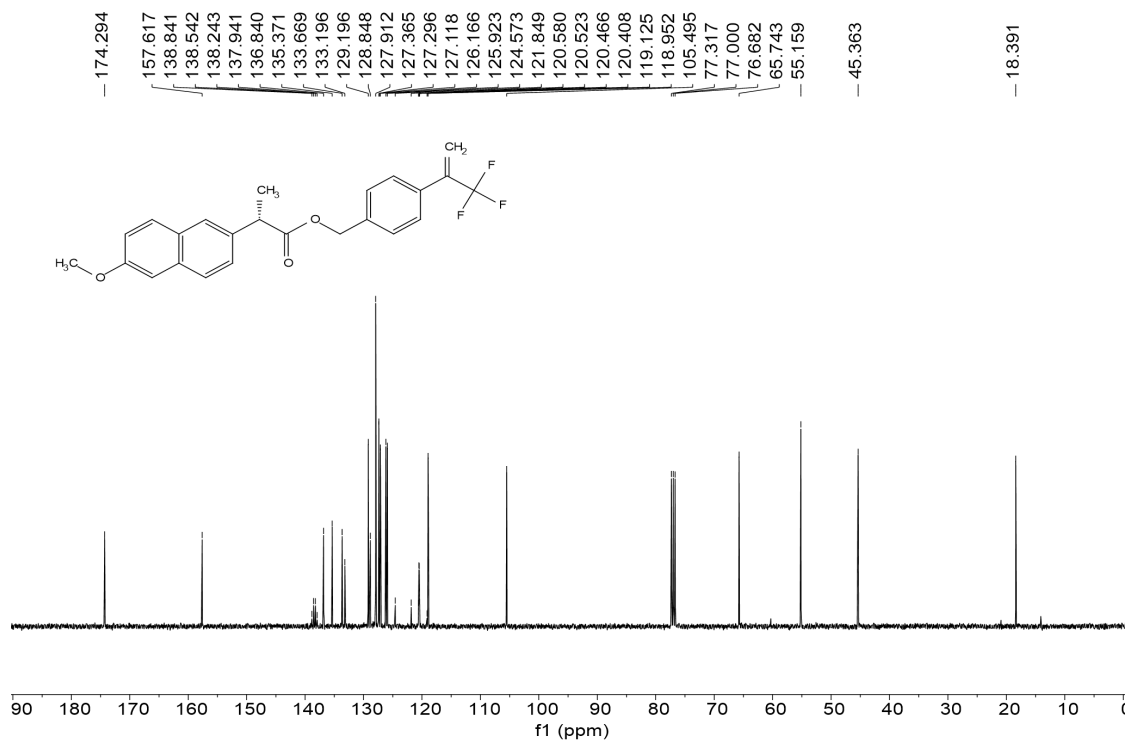

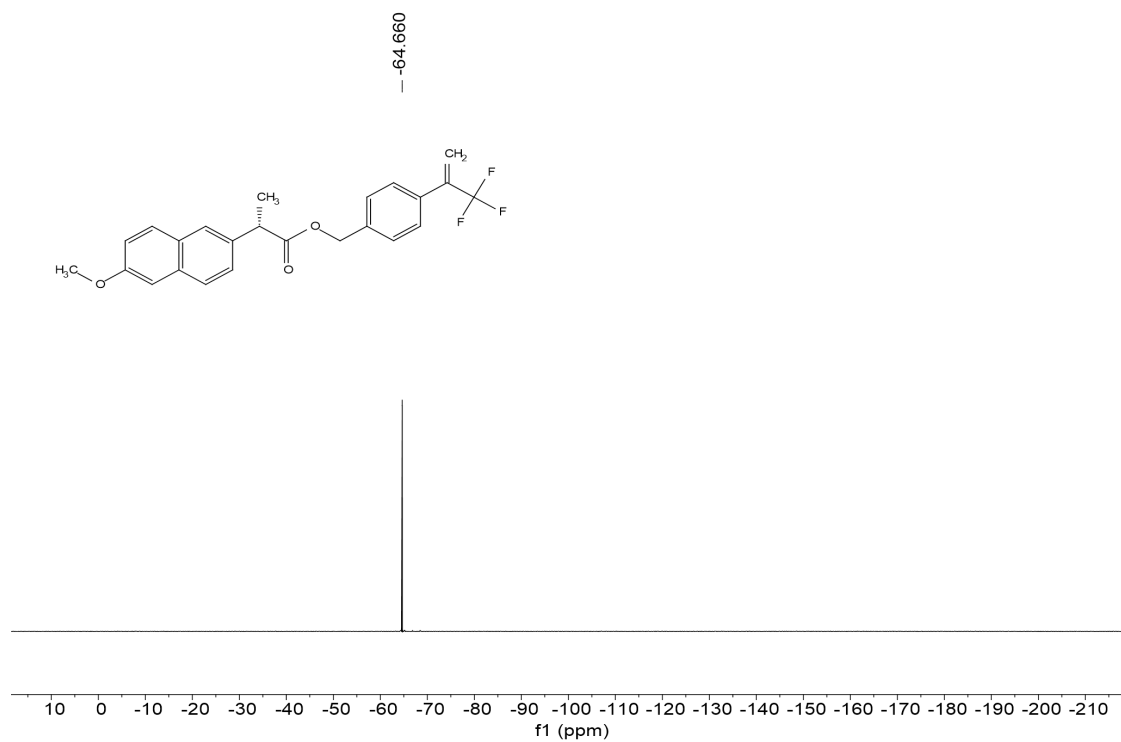

<sup>1</sup>H (400 MHz, CDCl<sub>3</sub>), <sup>13</sup>C (101 MHz, CDCl<sub>3</sub>) and <sup>19</sup>F (376 MHz, CDCl<sub>3</sub>) NMR spectrum of compound **1x**

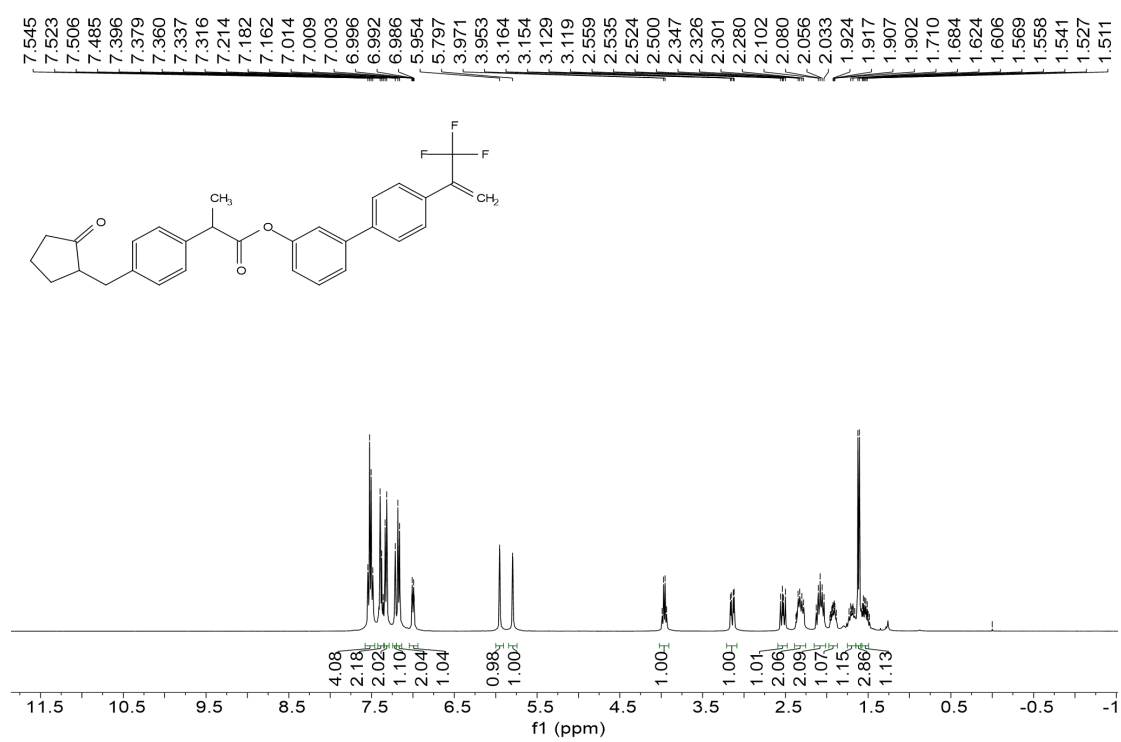

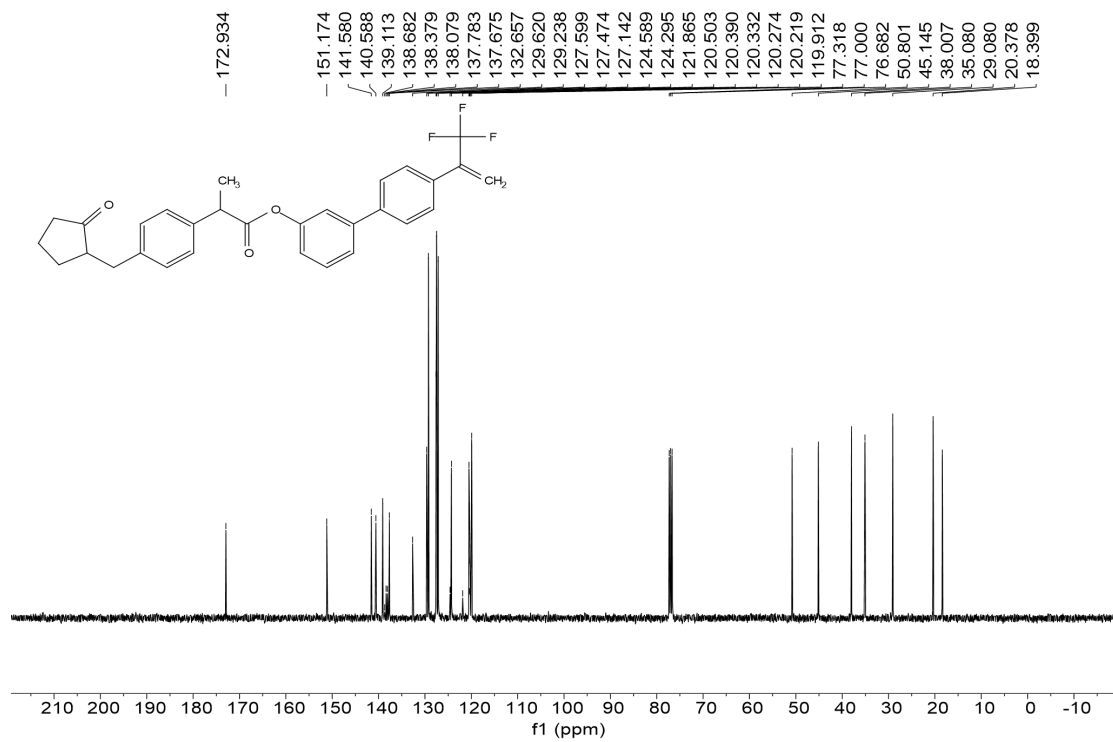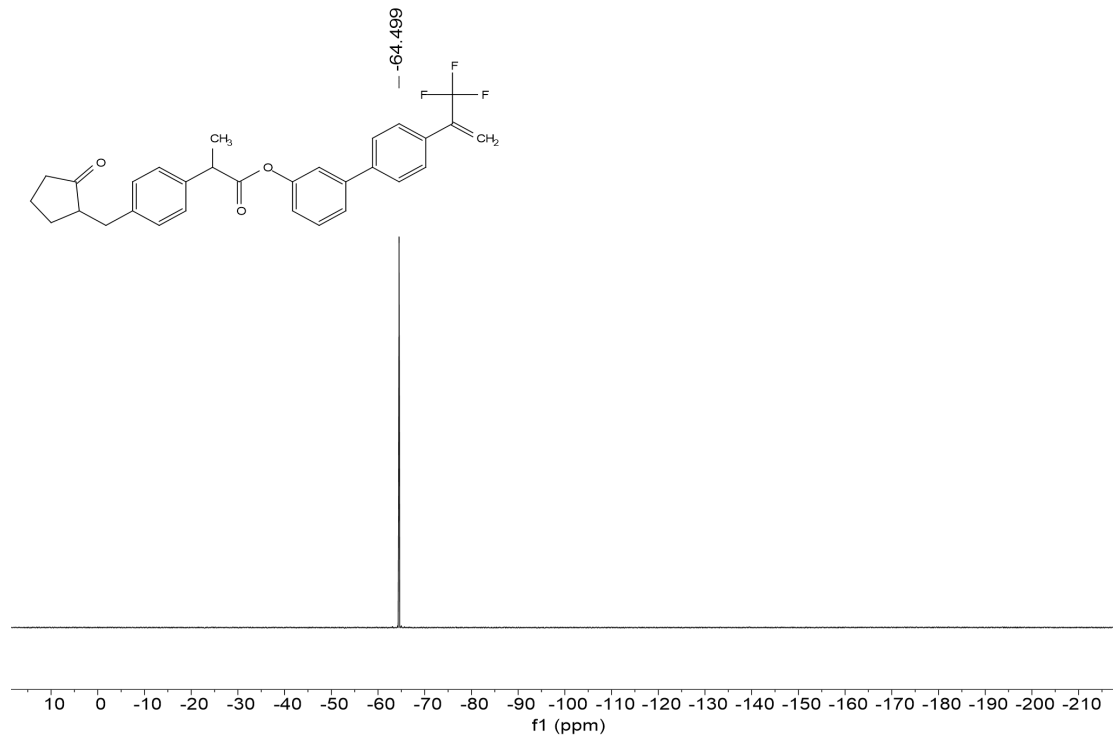

$^1\text{H}$  (400 MHz,  $\text{CDCl}_3$ ),  $^{13}\text{C}$  (101 MHz,  $\text{CDCl}_3$ ) and  $^{19}\text{F}$  (376 MHz,  $\text{CDCl}_3$ ) NMR spectrum of compound **1y**

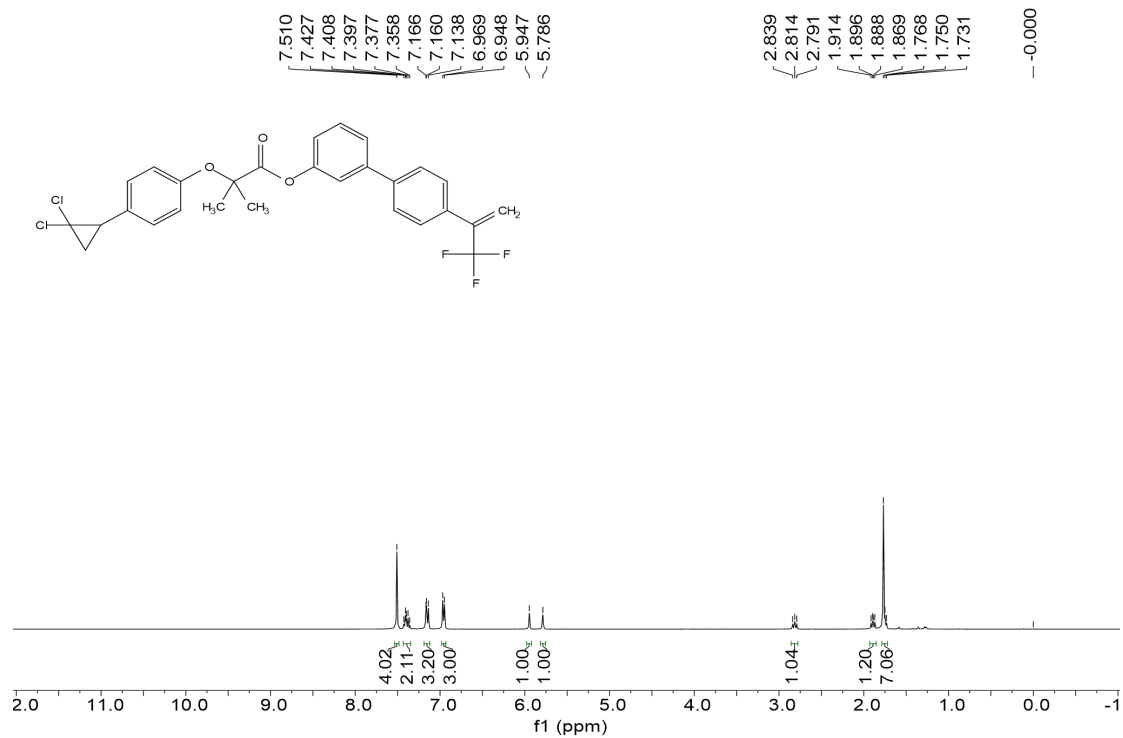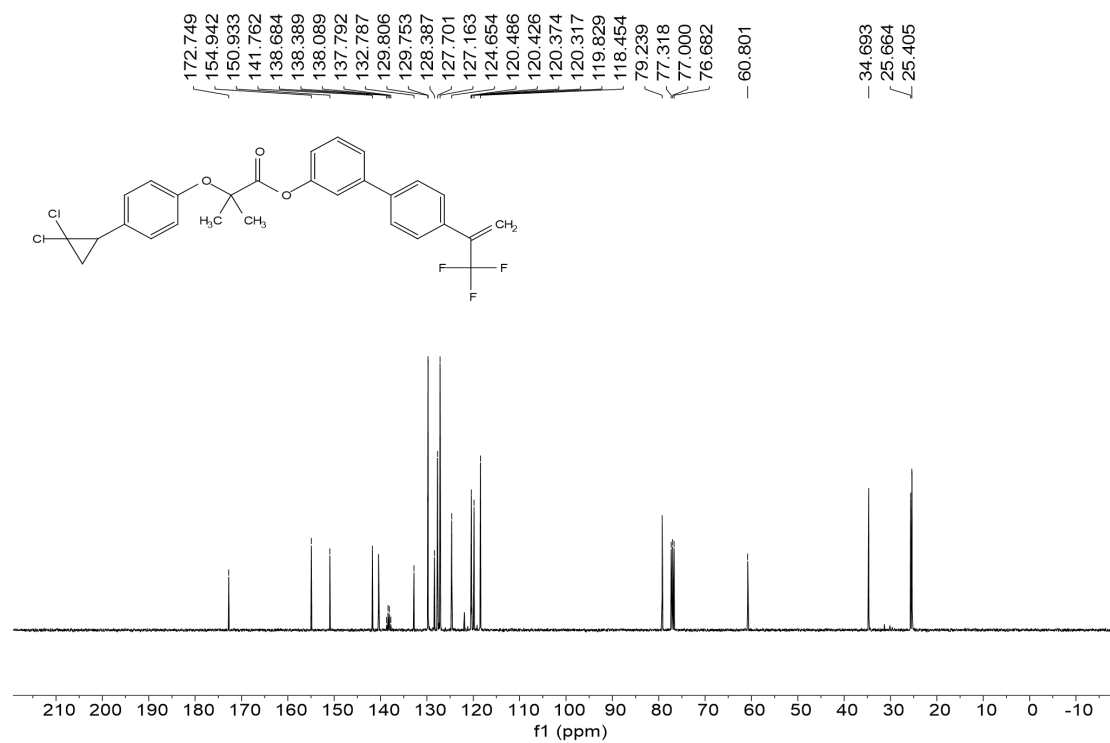

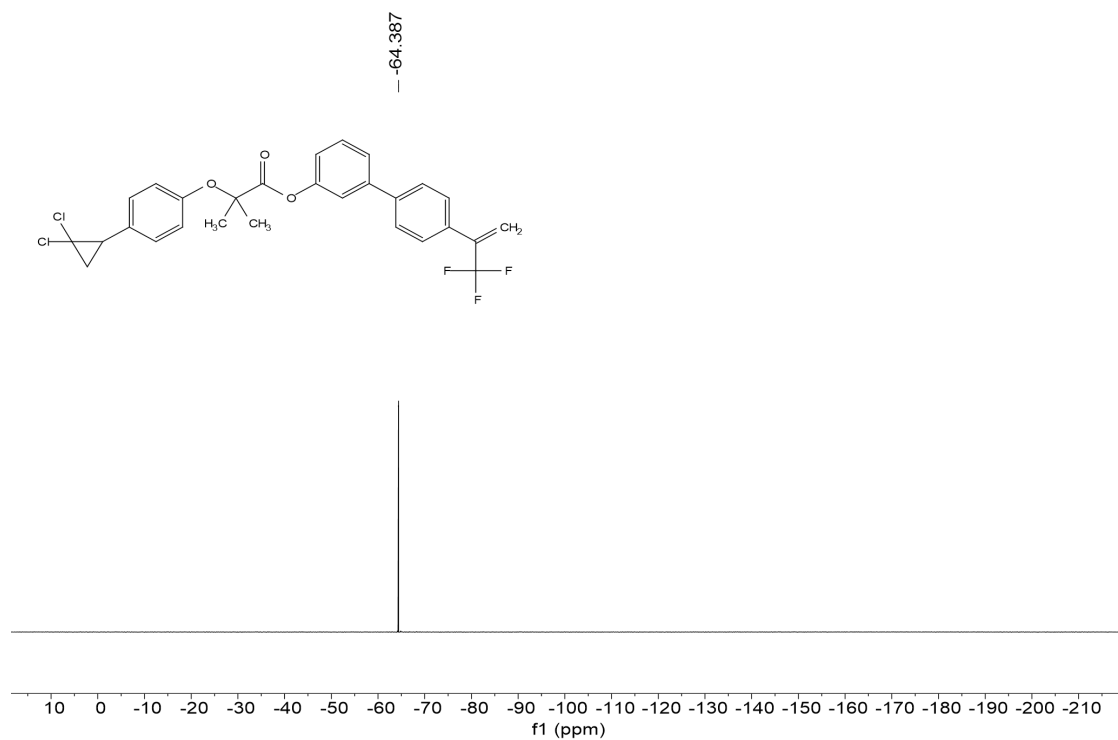

$^1\text{H}$  (400 MHz,  $\text{CDCl}_3$ ),  $^{13}\text{C}$  (101 MHz,  $\text{CDCl}_3$ ) and  $^{19}\text{F}$  (376 MHz,  $\text{CDCl}_3$ ) NMR spectrum of compound **1z**

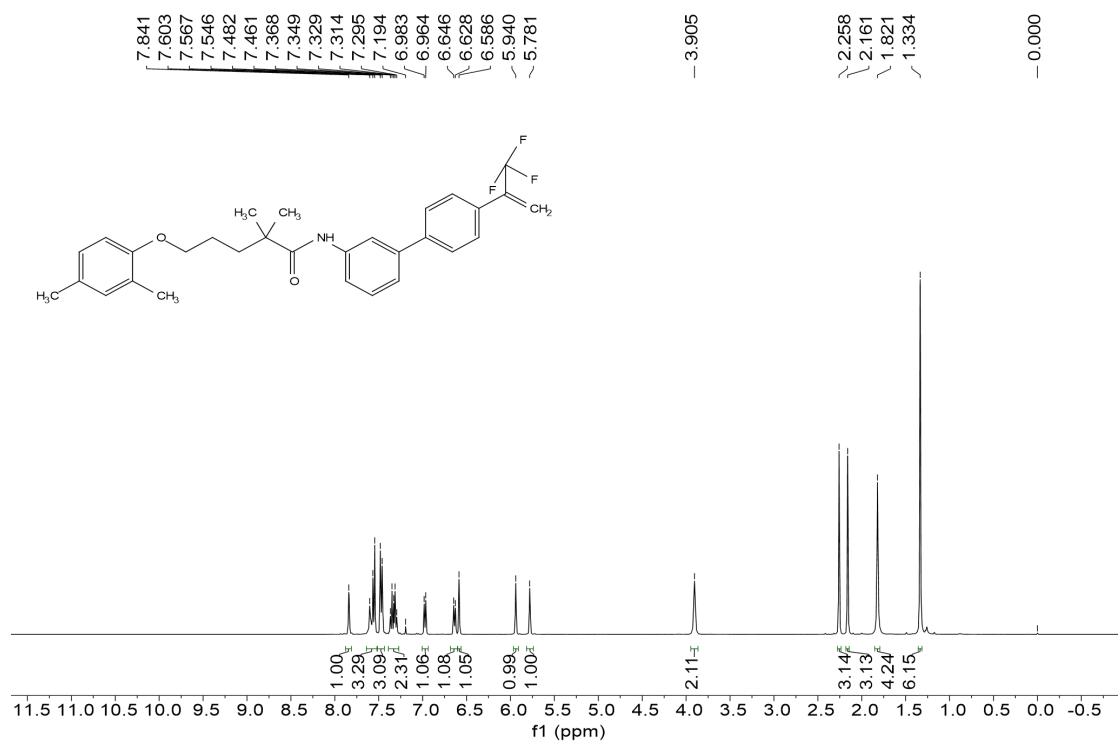



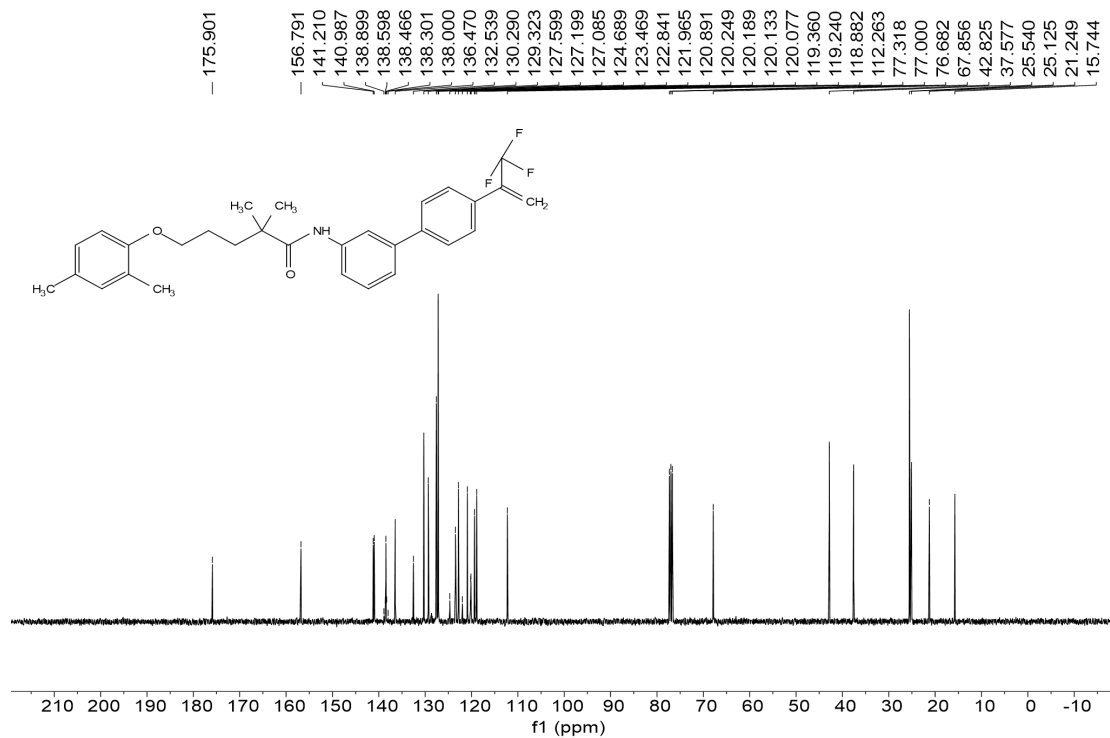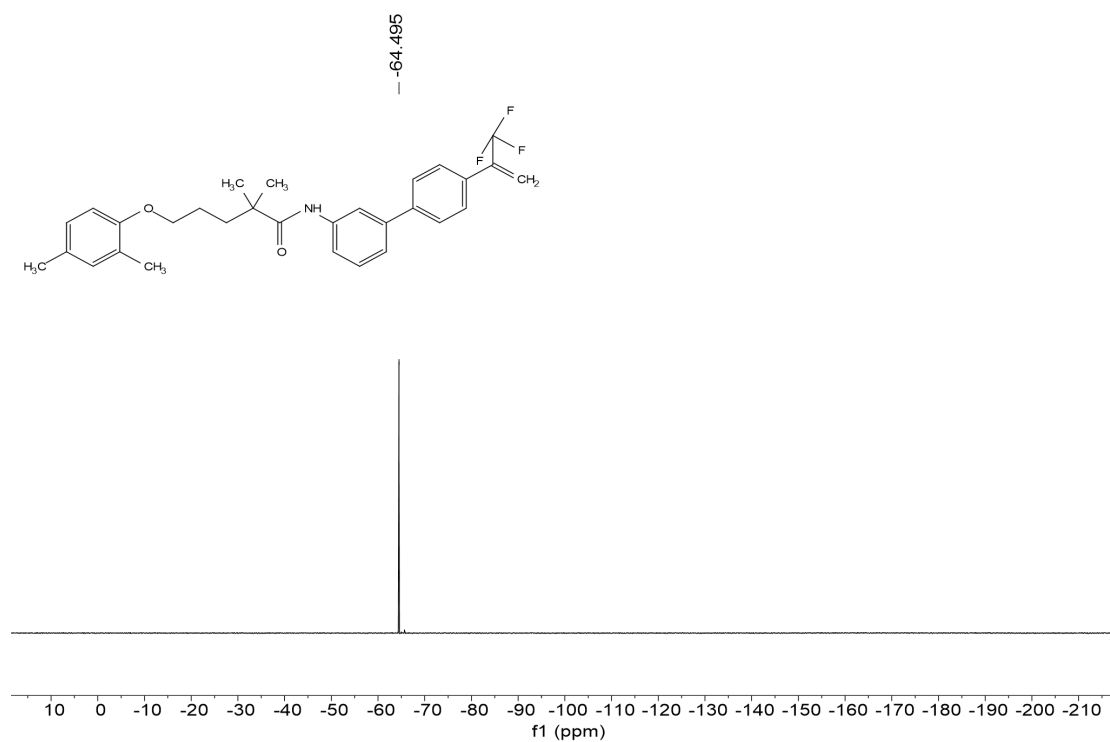

$^1\text{H}$  (400 MHz,  $\text{CDCl}_3$ ),  $^{13}\text{C}$  (101 MHz,  $\text{CDCl}_3$ ) and  $^{19}\text{F}$  (376 MHz,  $\text{CDCl}_3$ ) NMR spectrum of compound **1za**

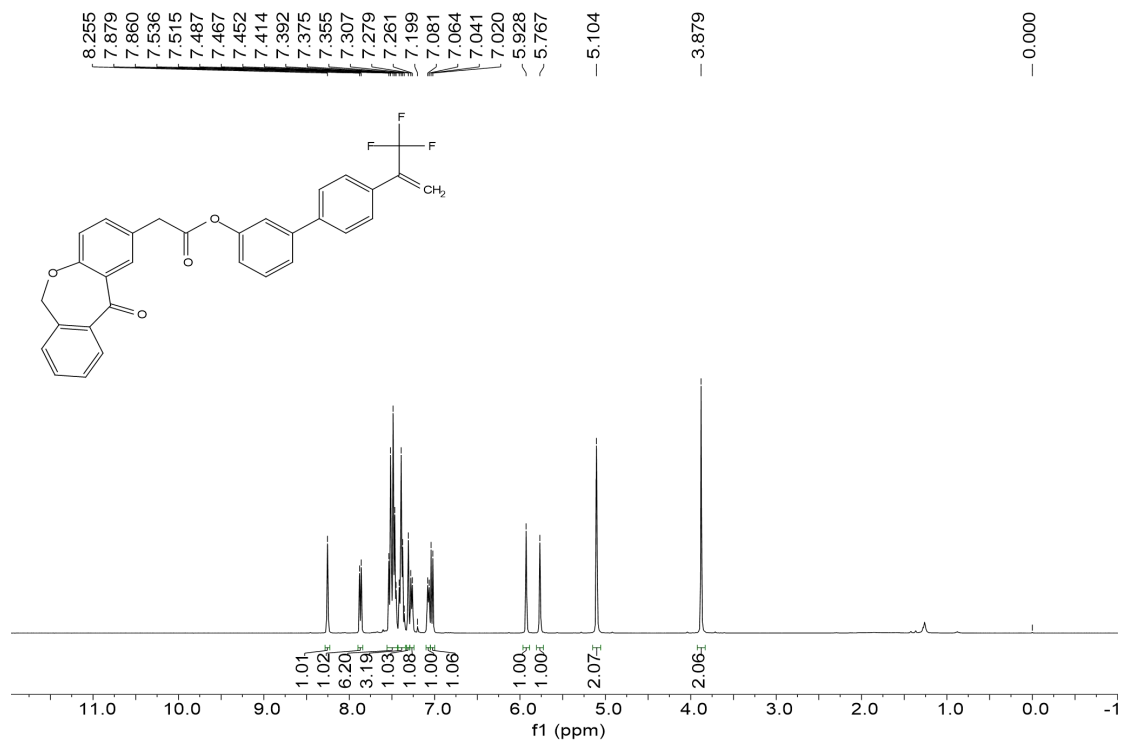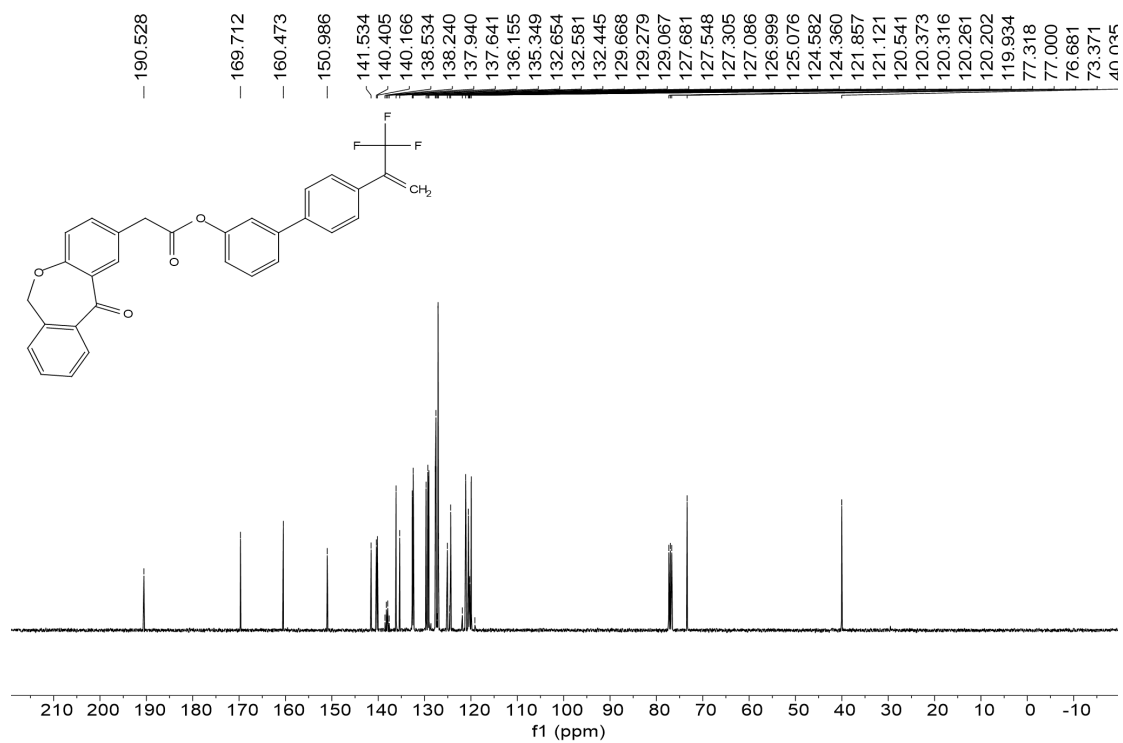

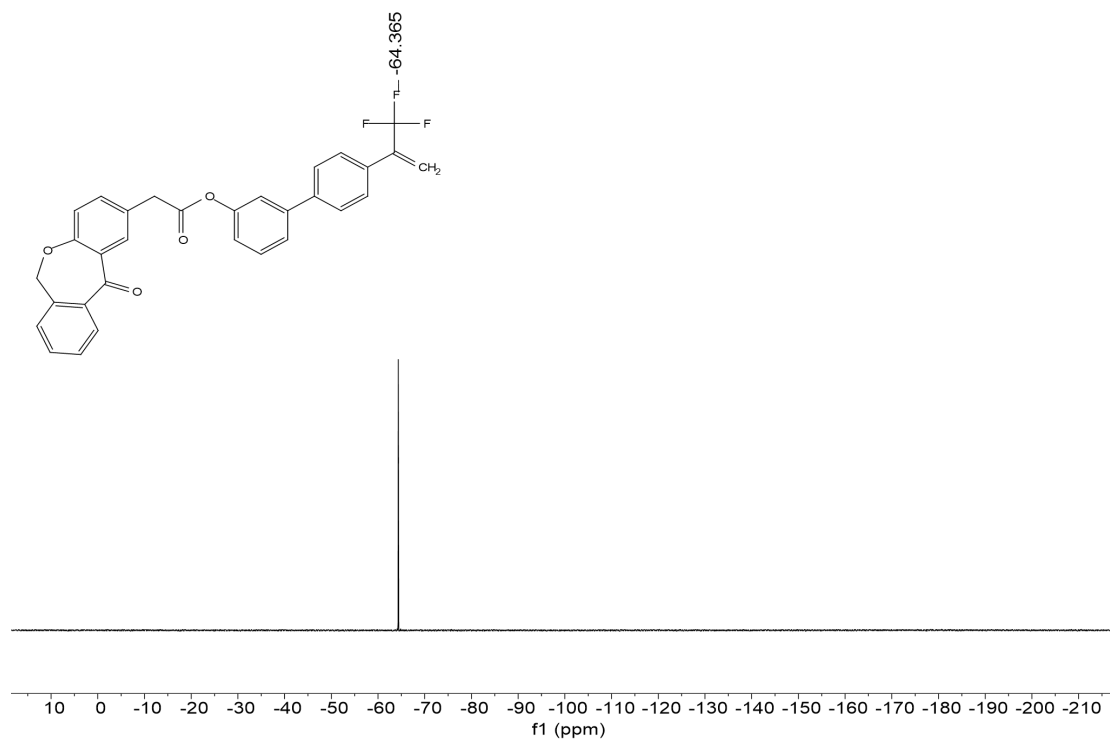

$^1\text{H}$  (400 MHz,  $\text{CDCl}_3$ ),  $^{13}\text{C}$  (101 MHz,  $\text{CDCl}_3$ ) and  $^{19}\text{F}$  (376 MHz,  $\text{CDCl}_3$ ) NMR spectrum of compound **3**

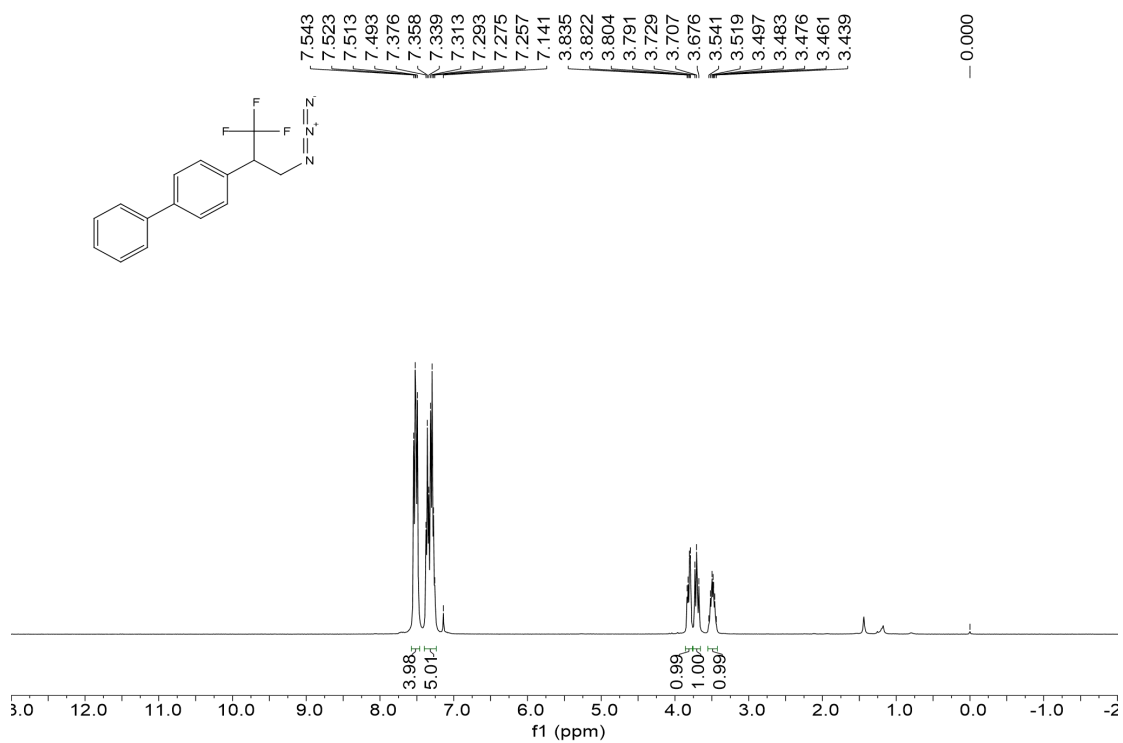

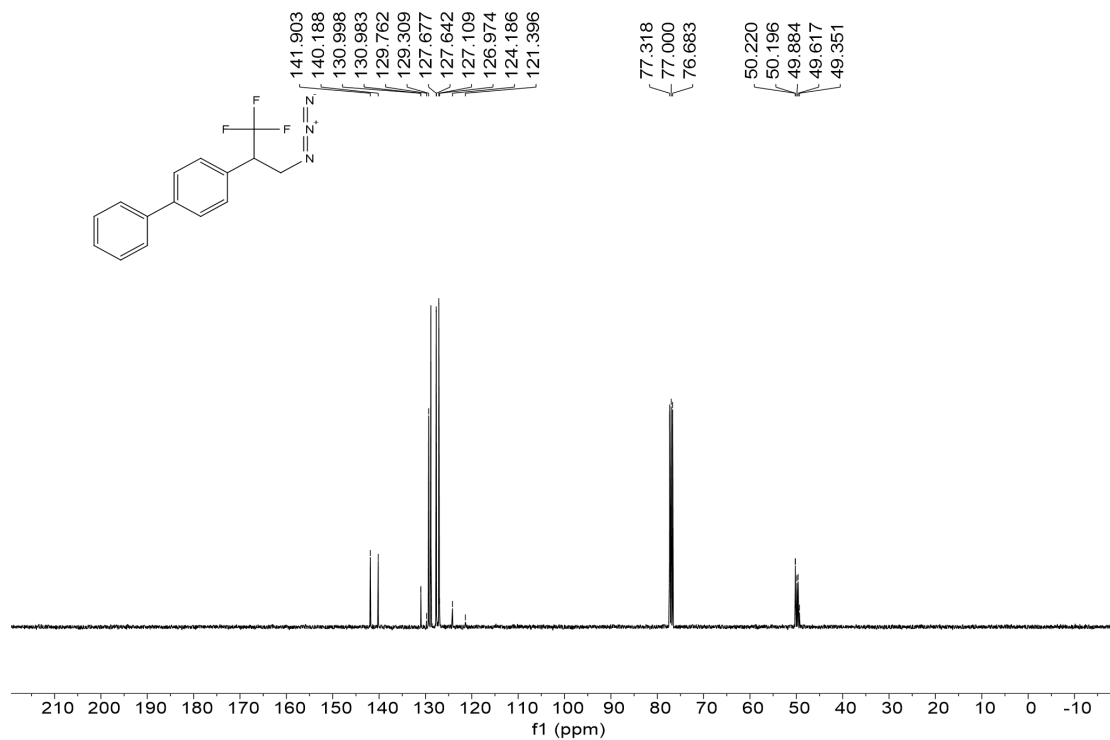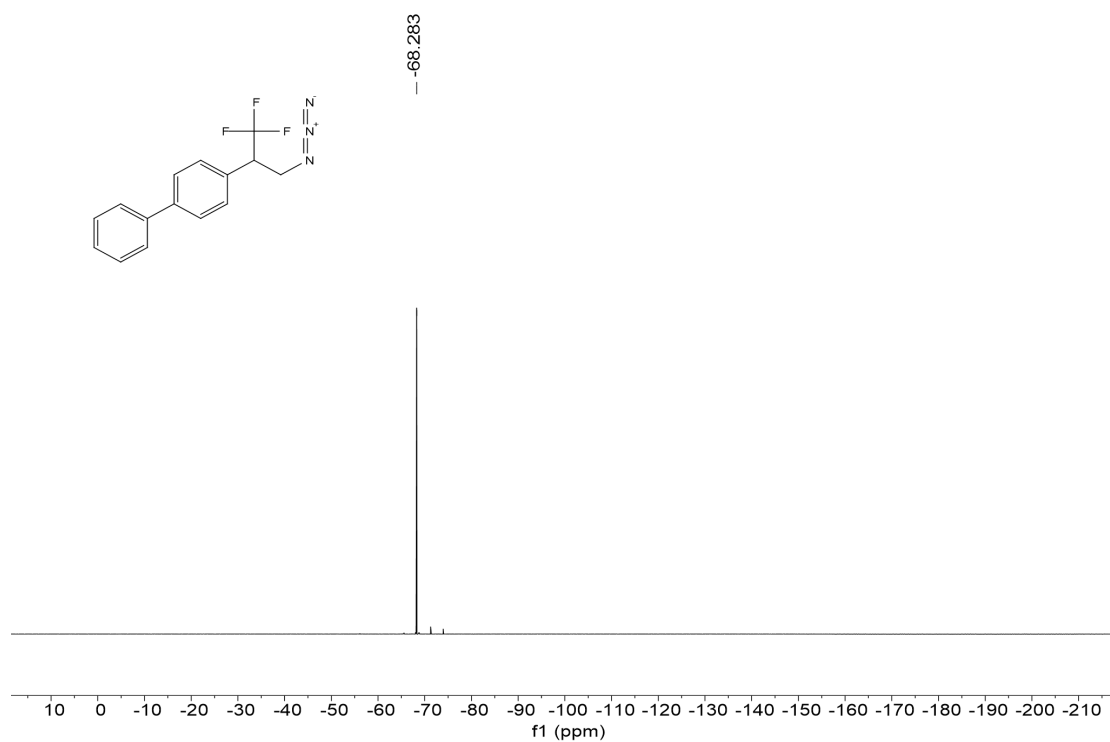

$^1\text{H}$  (400 MHz,  $\text{CDCl}_3$ ),  $^{13}\text{C}$  (101 MHz,  $\text{CDCl}_3$ ) and  $^{19}\text{F}$  (376 MHz,  $\text{CDCl}_3$ ) NMR spectrum of compound 4

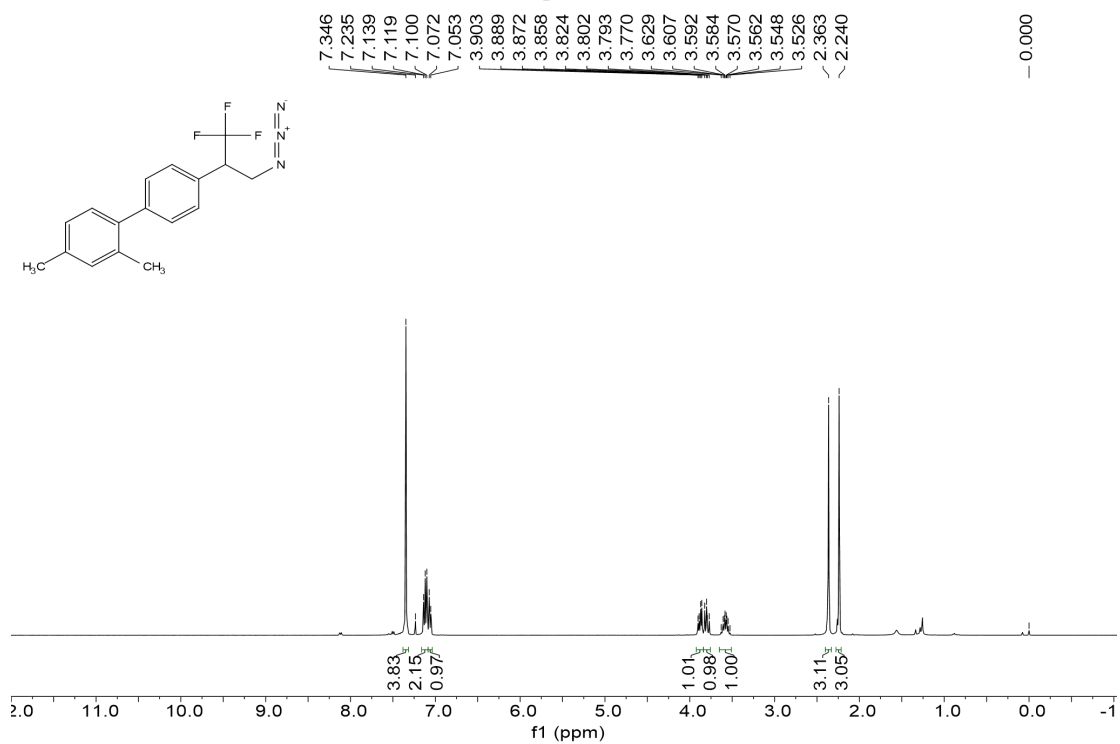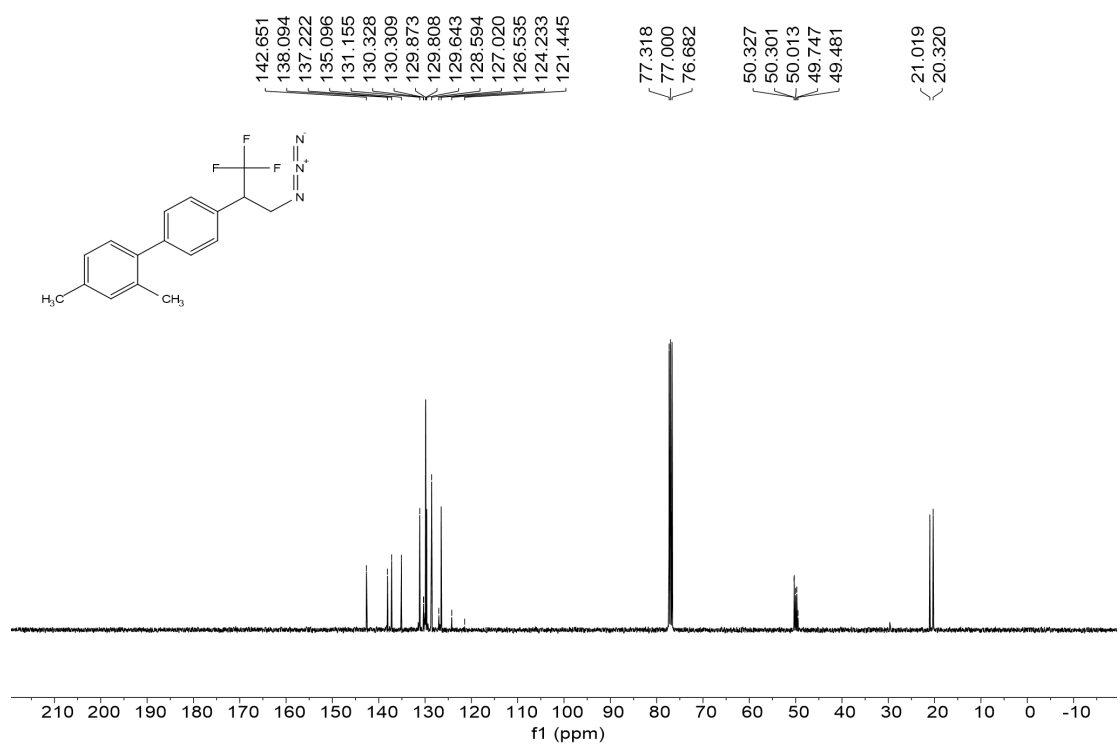

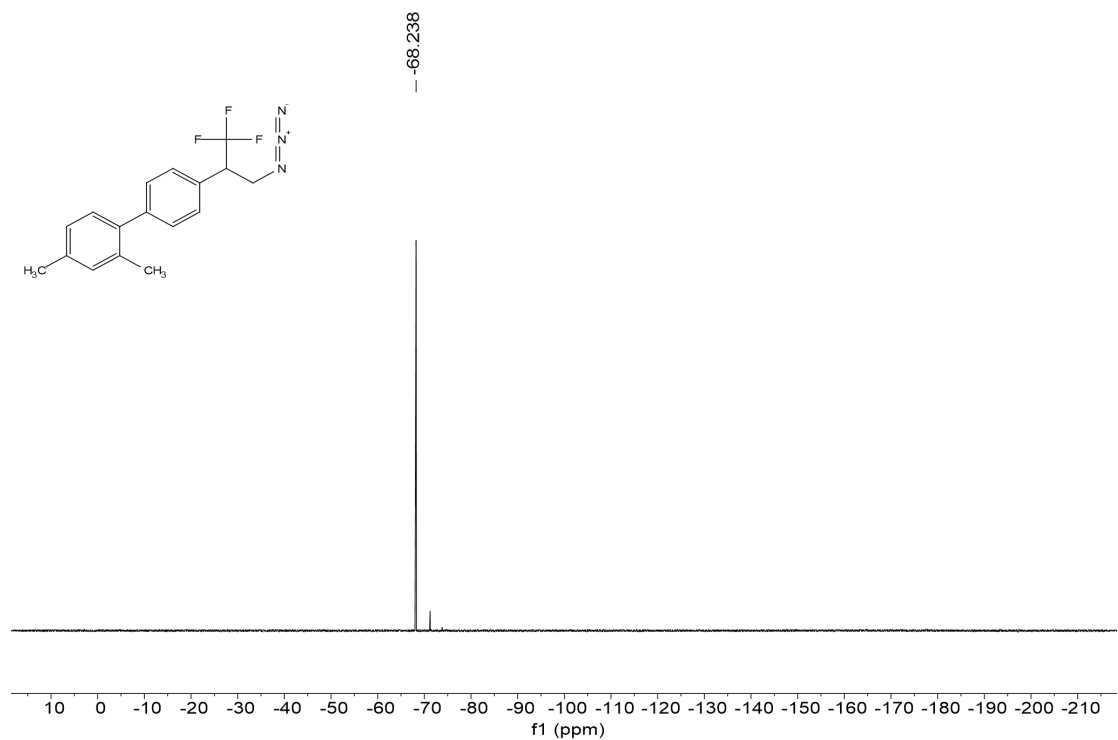

$^1\text{H}$  (400 MHz,  $\text{CDCl}_3$ ),  $^{13}\text{C}$  (101 MHz,  $\text{CDCl}_3$ ) and  $^{19}\text{F}$  (376 MHz,  $\text{CDCl}_3$ ) NMR spectrum of compound **5**

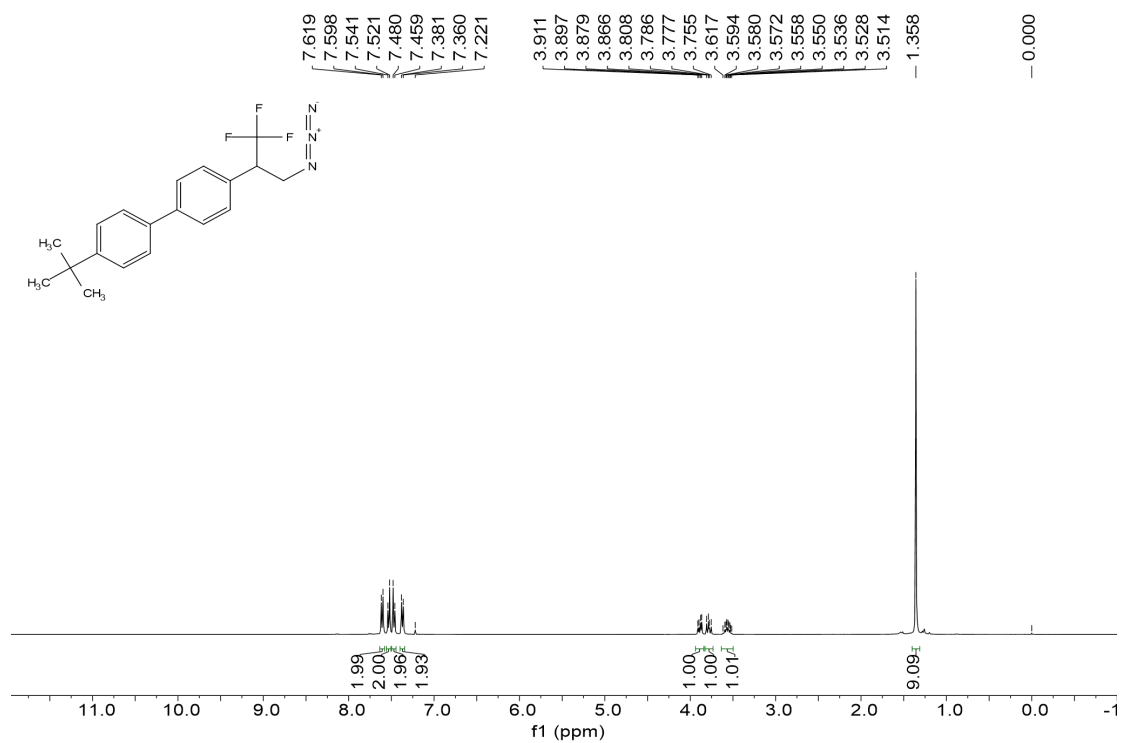

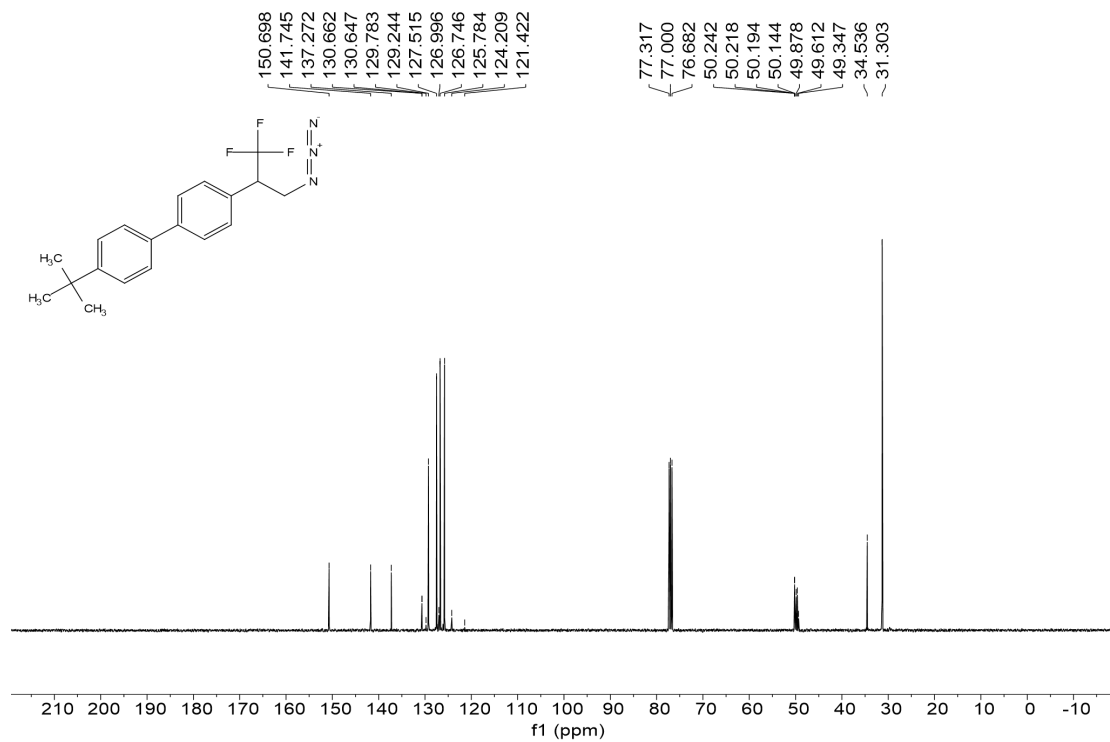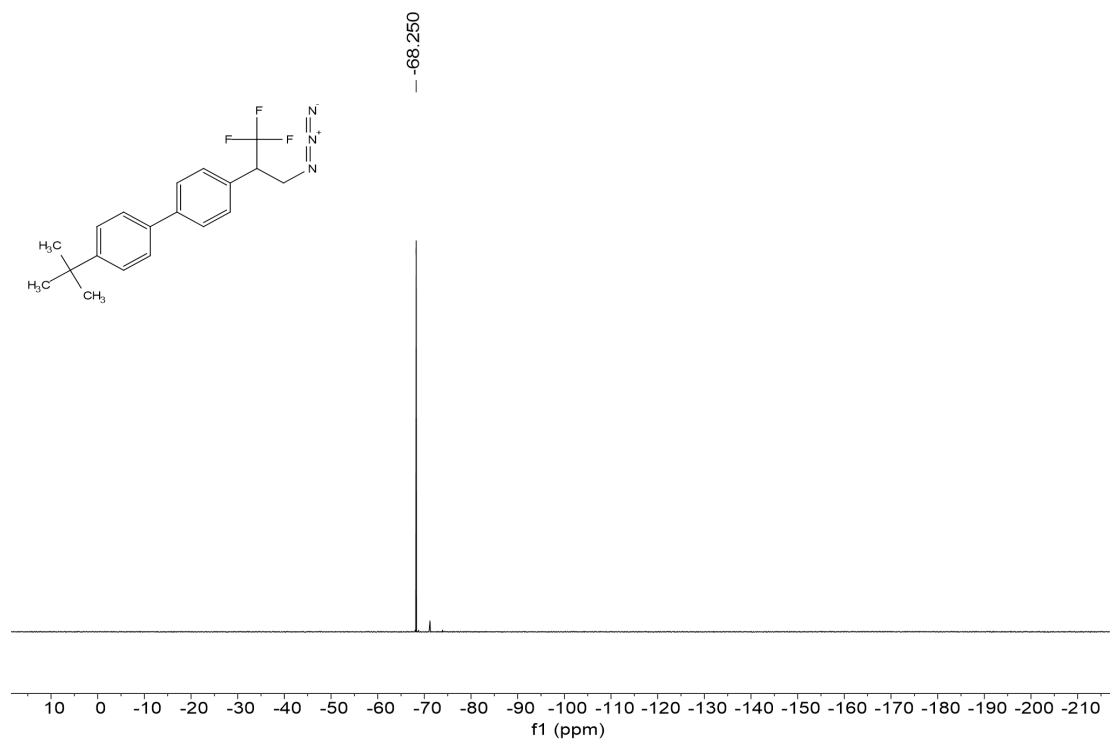

$^1\text{H}$  (400 MHz,  $\text{CDCl}_3$ ),  $^{13}\text{C}$  (101 MHz,  $\text{CDCl}_3$ ) and  $^{19}\text{F}$  (376 MHz,  $\text{CDCl}_3$ ) NMR spectrum of compound **6**

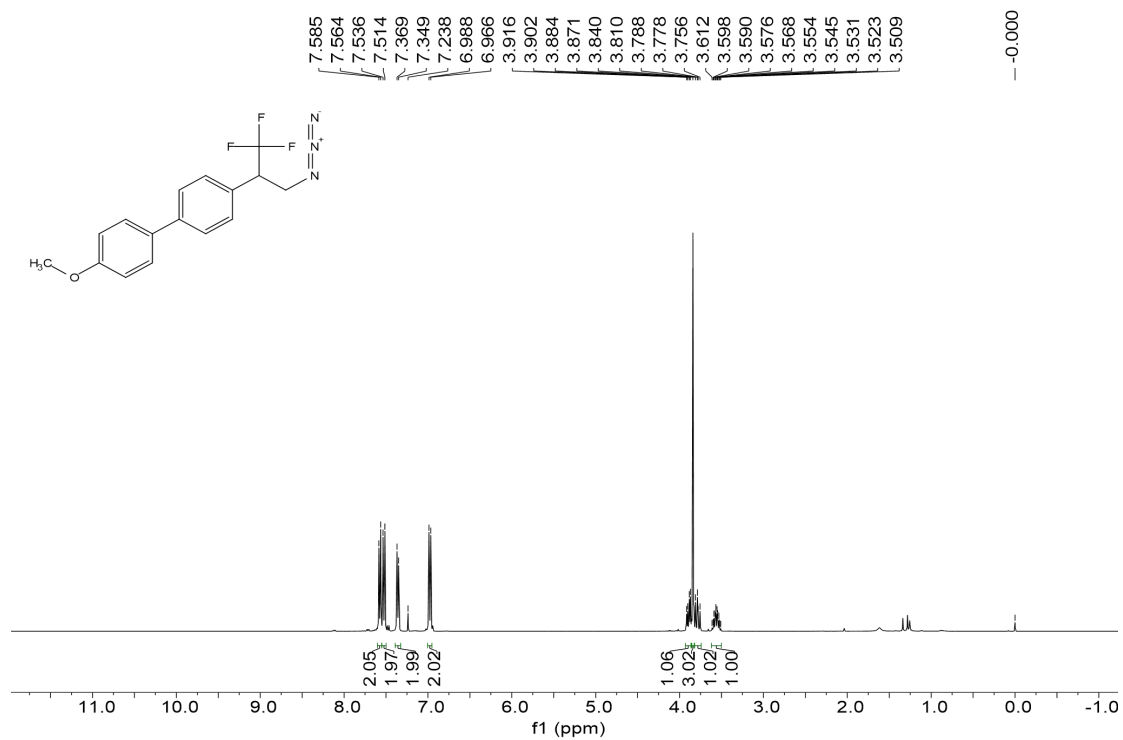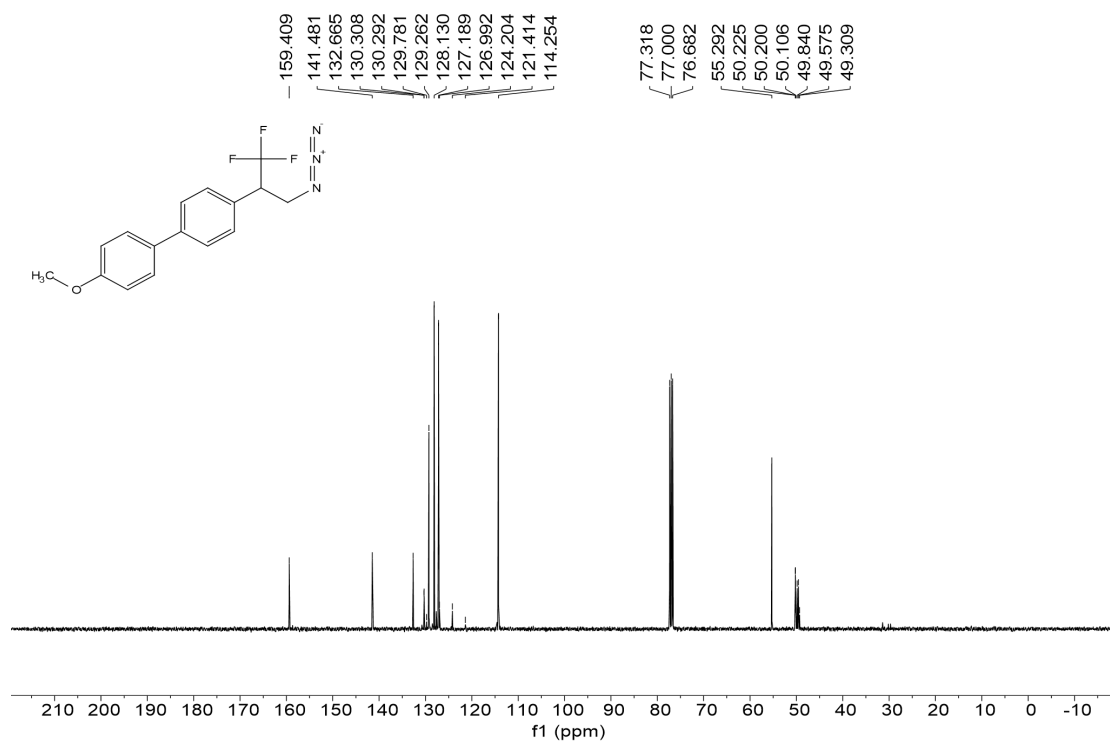



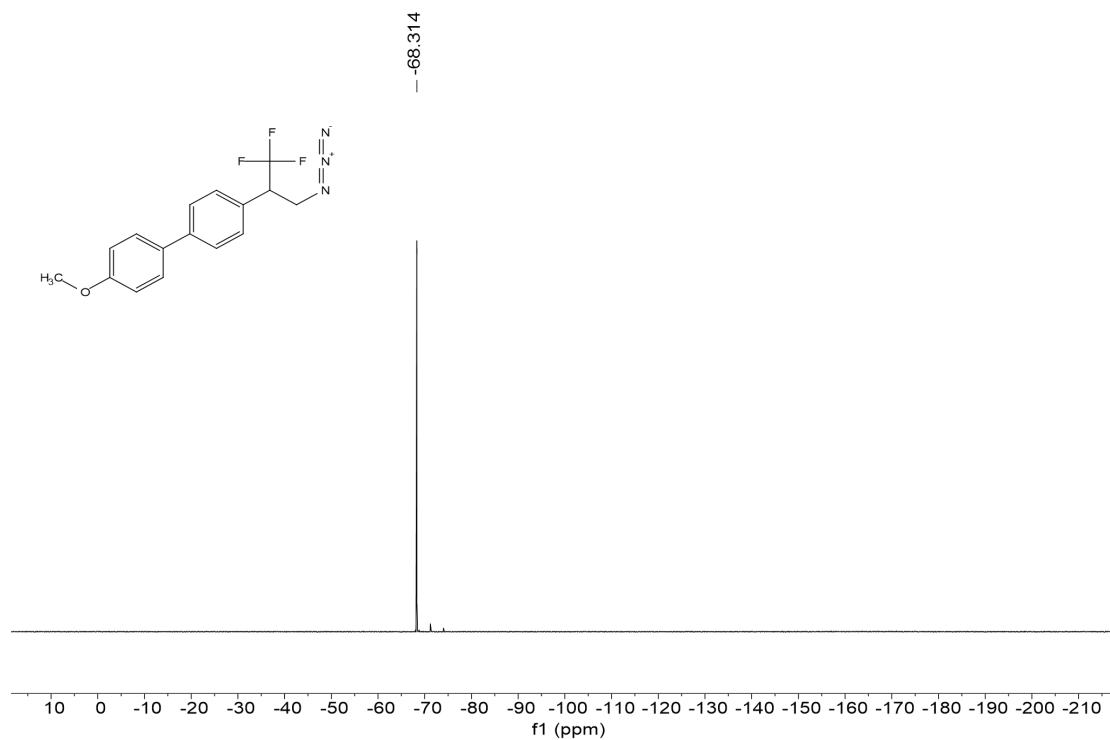

$^1\text{H}$  (400 MHz,  $\text{CDCl}_3$ ),  $^{13}\text{C}$  (101 MHz,  $\text{CDCl}_3$ ) and  $^{19}\text{F}$  (376 MHz,  $\text{CDCl}_3$ ) NMR spectrum of compound 7

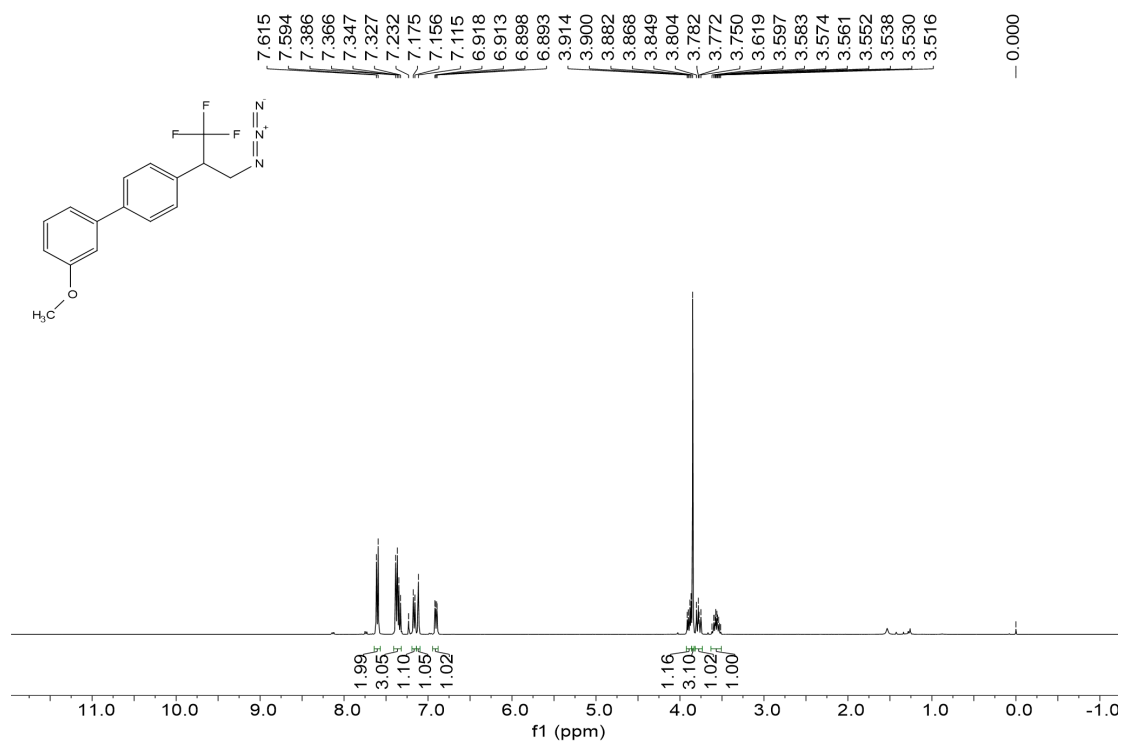

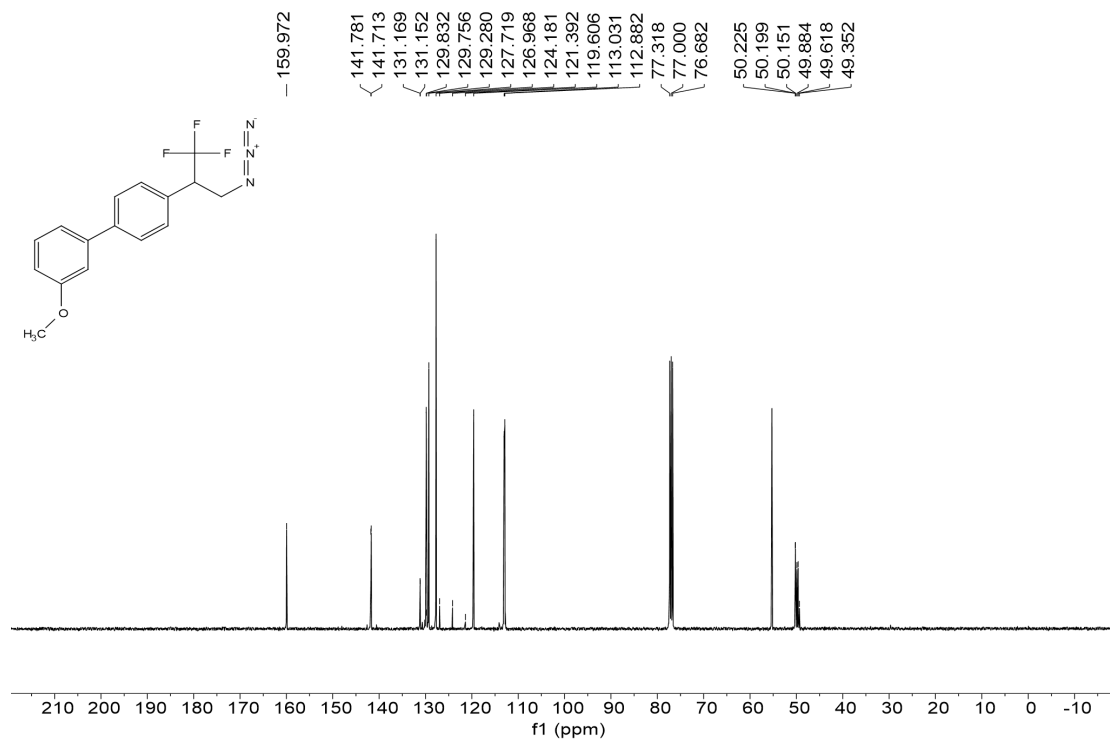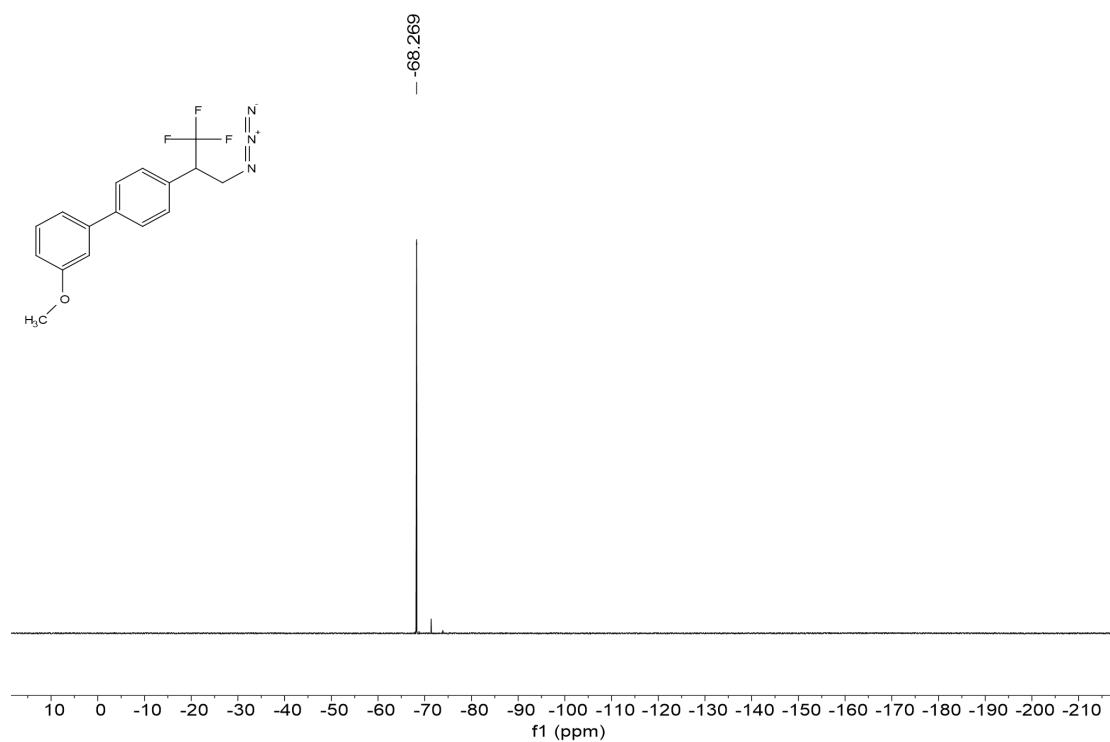

$^1\text{H}$  (400 MHz,  $\text{CDCl}_3$ ),  $^{13}\text{C}$  (101 MHz,  $\text{CDCl}_3$ ) and  $^{19}\text{F}$  (376 MHz,  $\text{CDCl}_3$ ) NMR spectrum of compound **8**

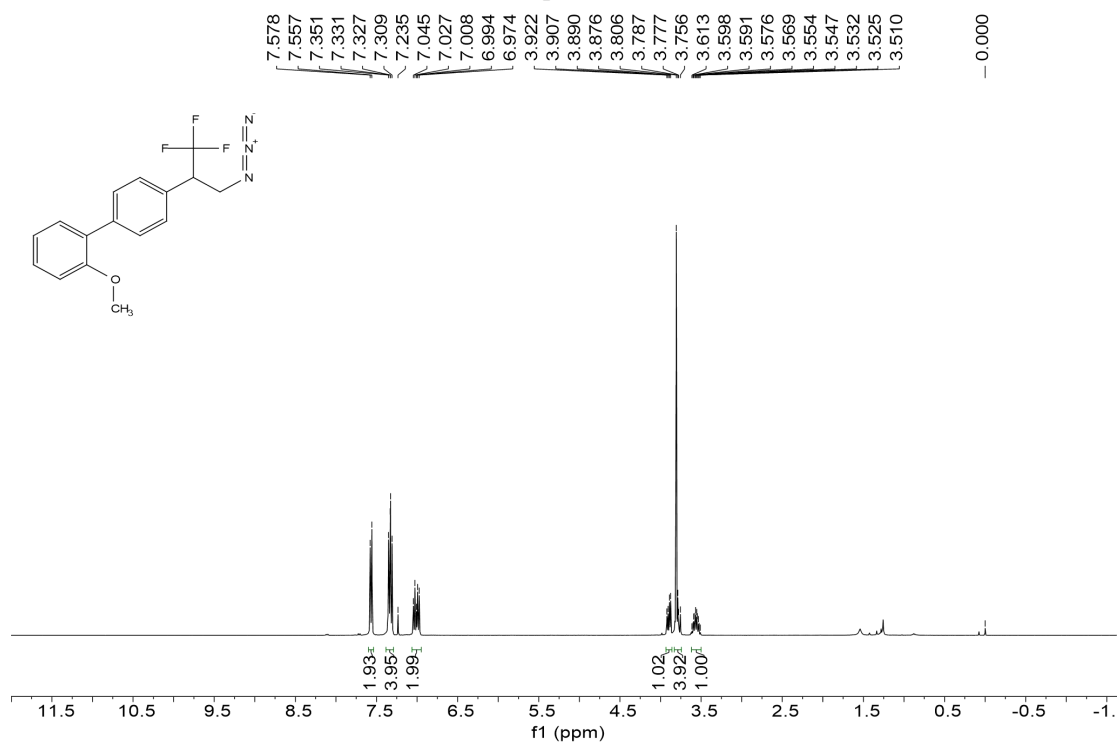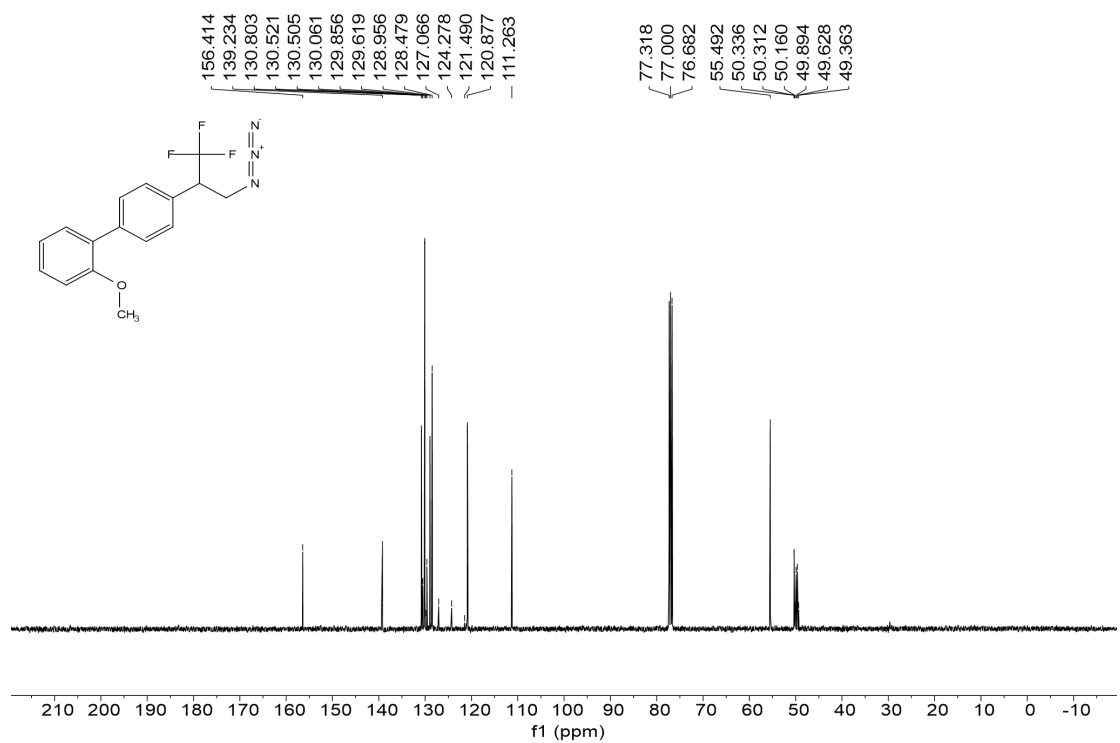

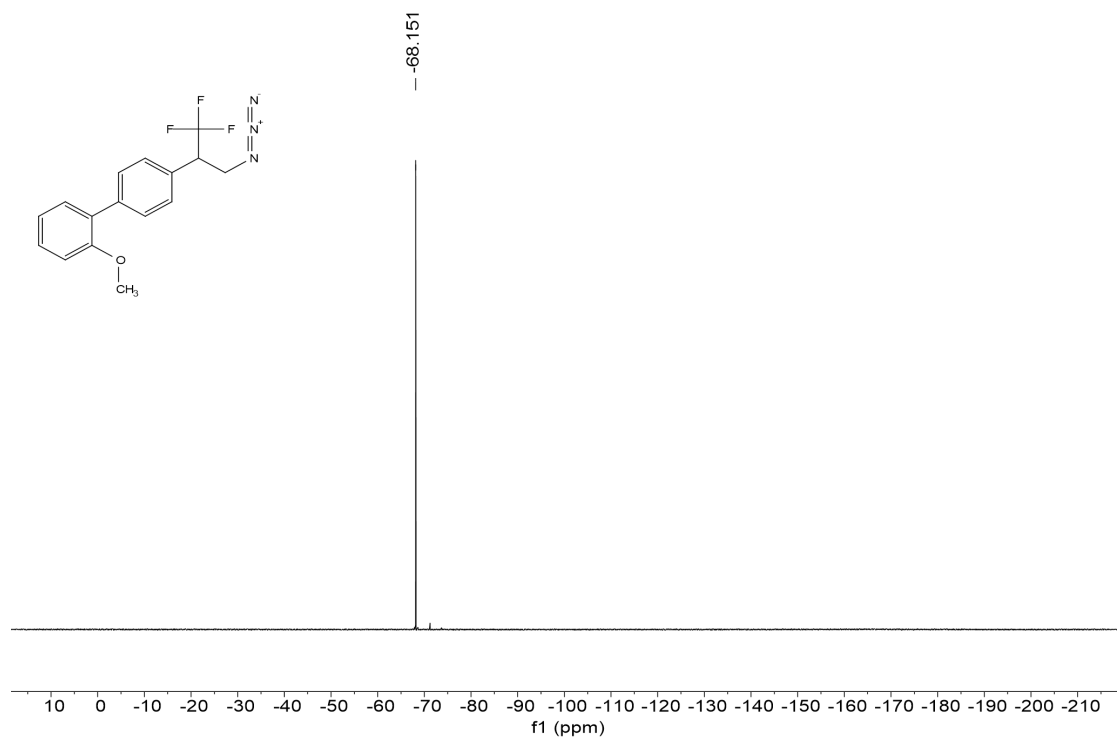

$^1\text{H}$  (400 MHz,  $\text{CDCl}_3$ ),  $^{13}\text{C}$  (101 MHz,  $\text{CDCl}_3$ ) and  $^{19}\text{F}$  (376 MHz,  $\text{CDCl}_3$ ) NMR spectrum of compound 9

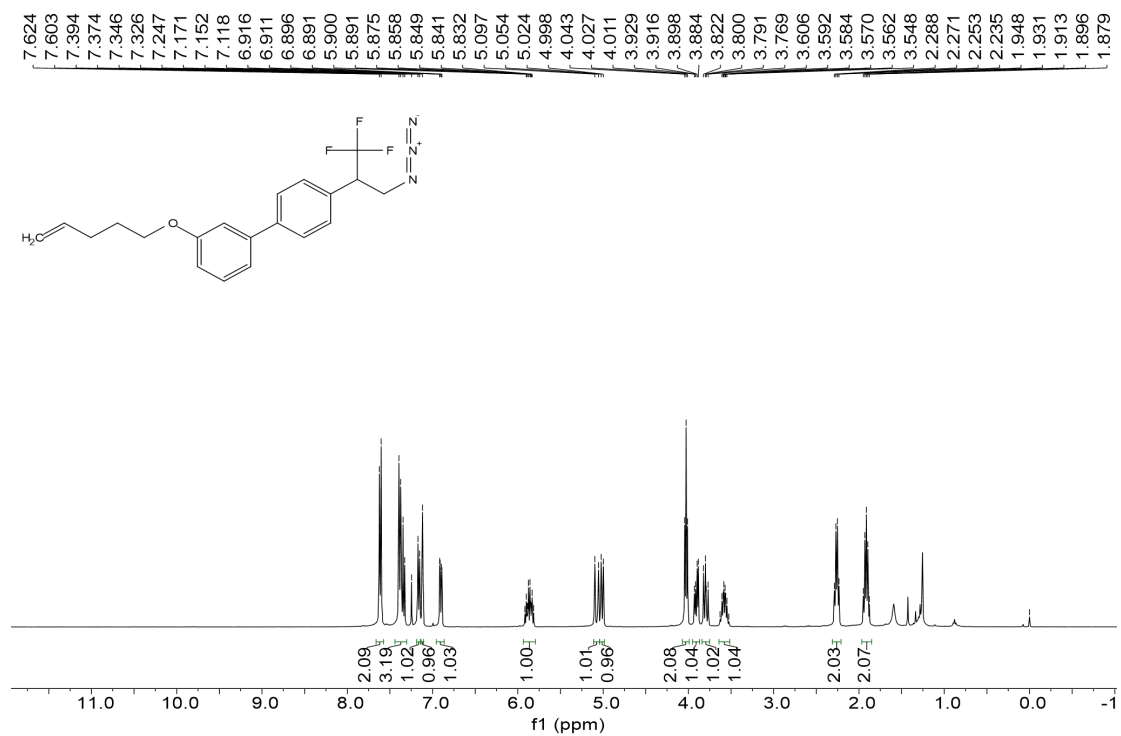

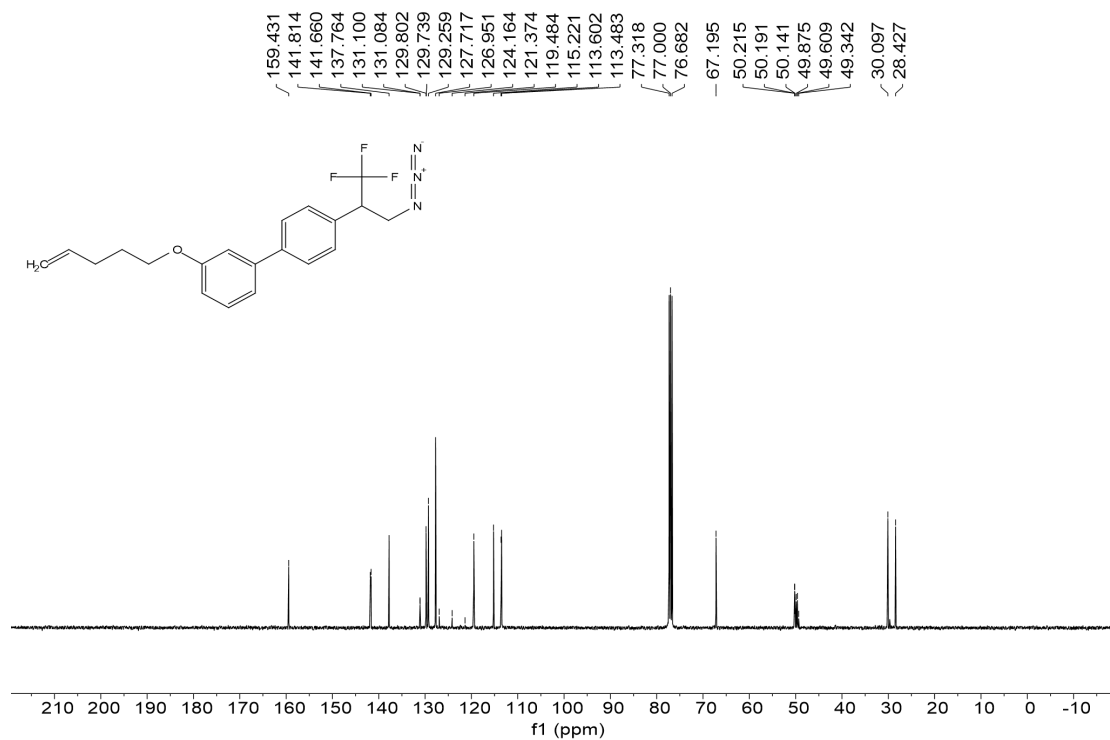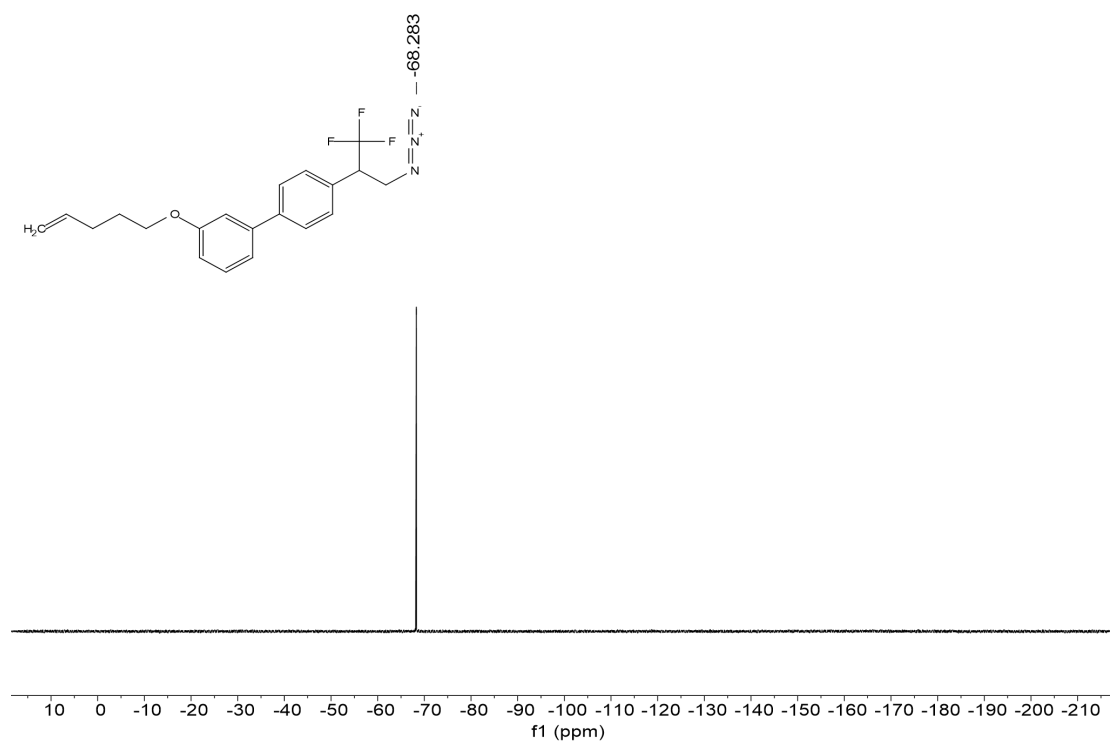

$^1\text{H}$  (400 MHz,  $\text{CDCl}_3$ ),  $^{13}\text{C}$  (101 MHz,  $\text{CDCl}_3$ ) and  $^{19}\text{F}$  (376 MHz,  $\text{CDCl}_3$ ) NMR spectrum of compound **10**

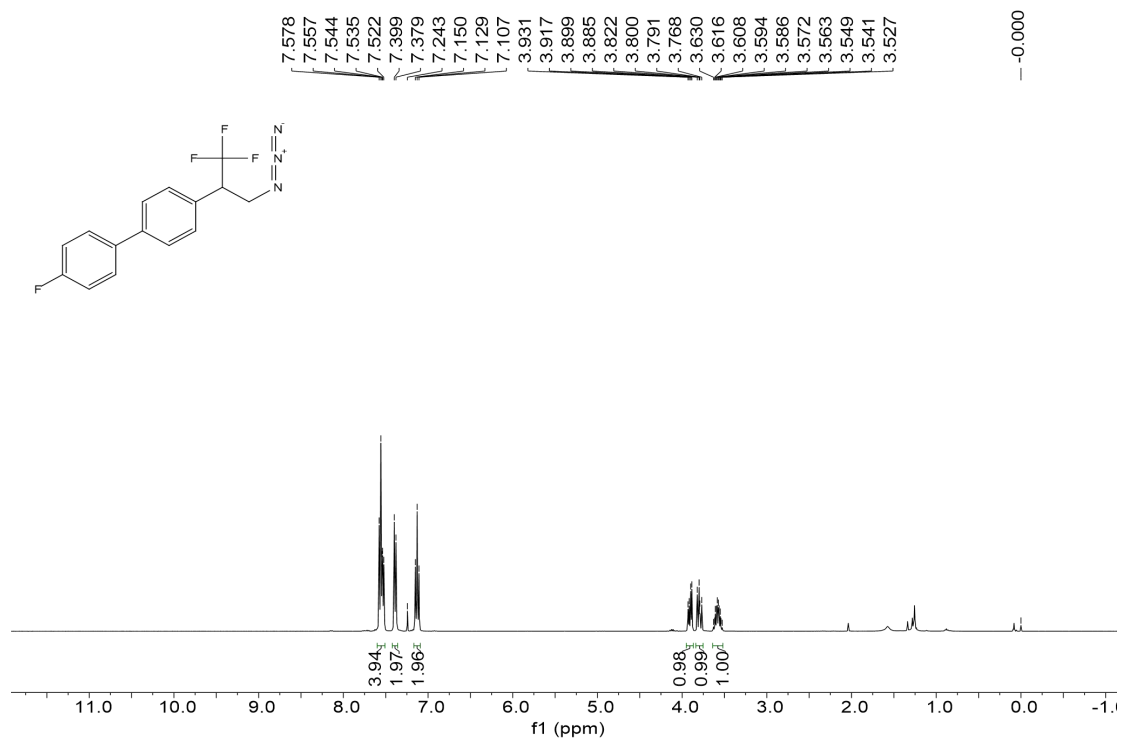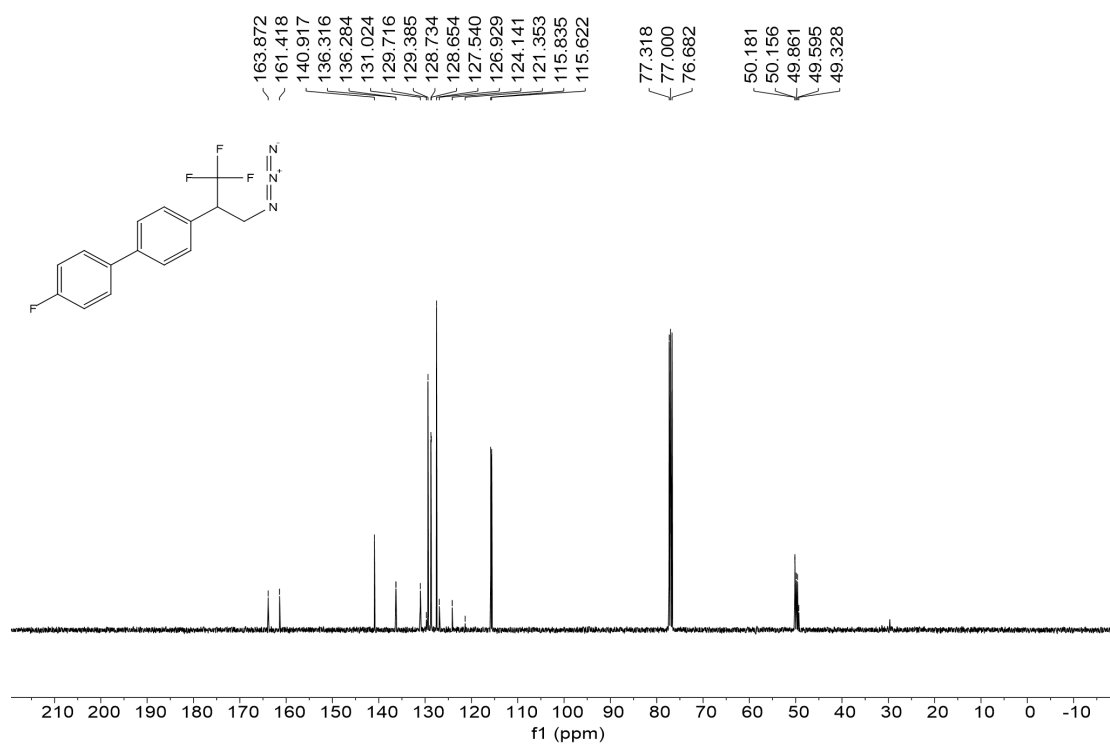

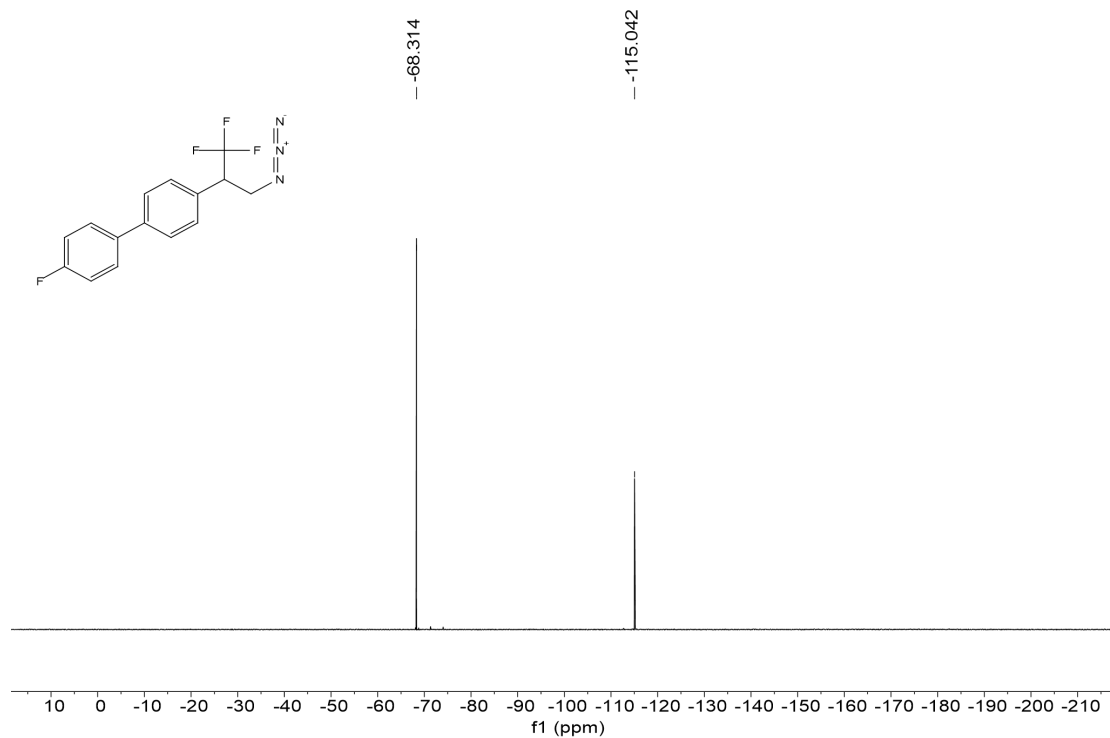

$^1\text{H}$  (400 MHz,  $\text{CDCl}_3$ ),  $^{13}\text{C}$  (101 MHz,  $\text{CDCl}_3$ ) and  $^{19}\text{F}$  (376 MHz,  $\text{CDCl}_3$ ) NMR spectrum of compound 11

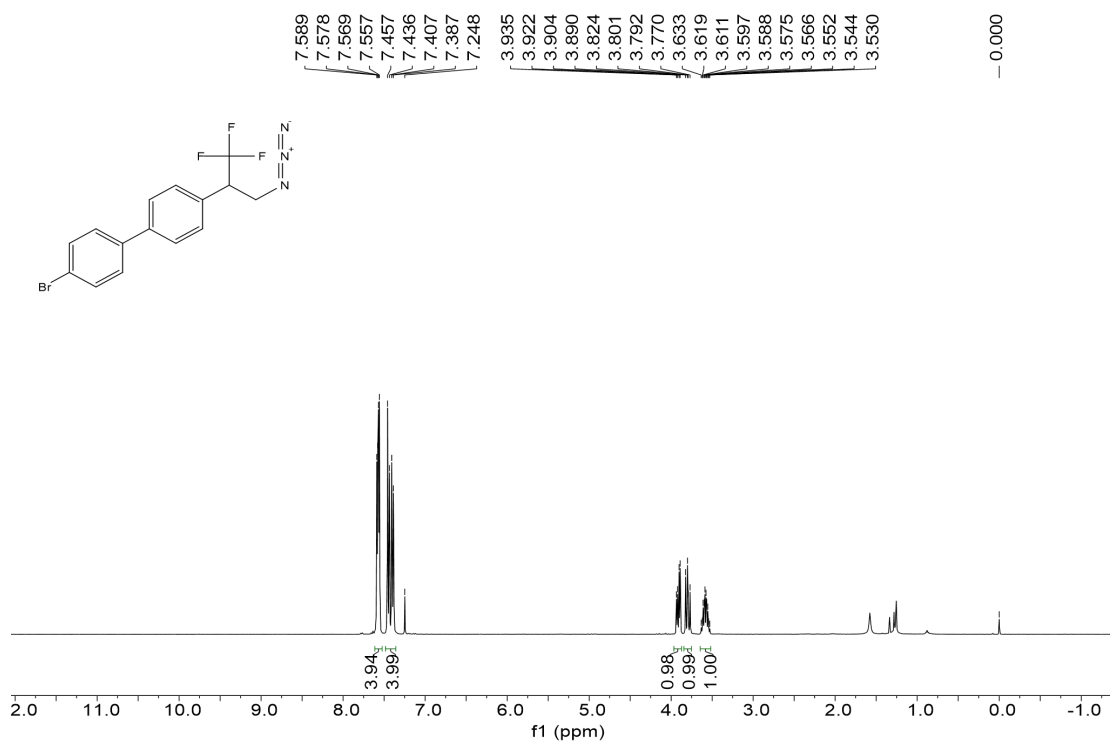

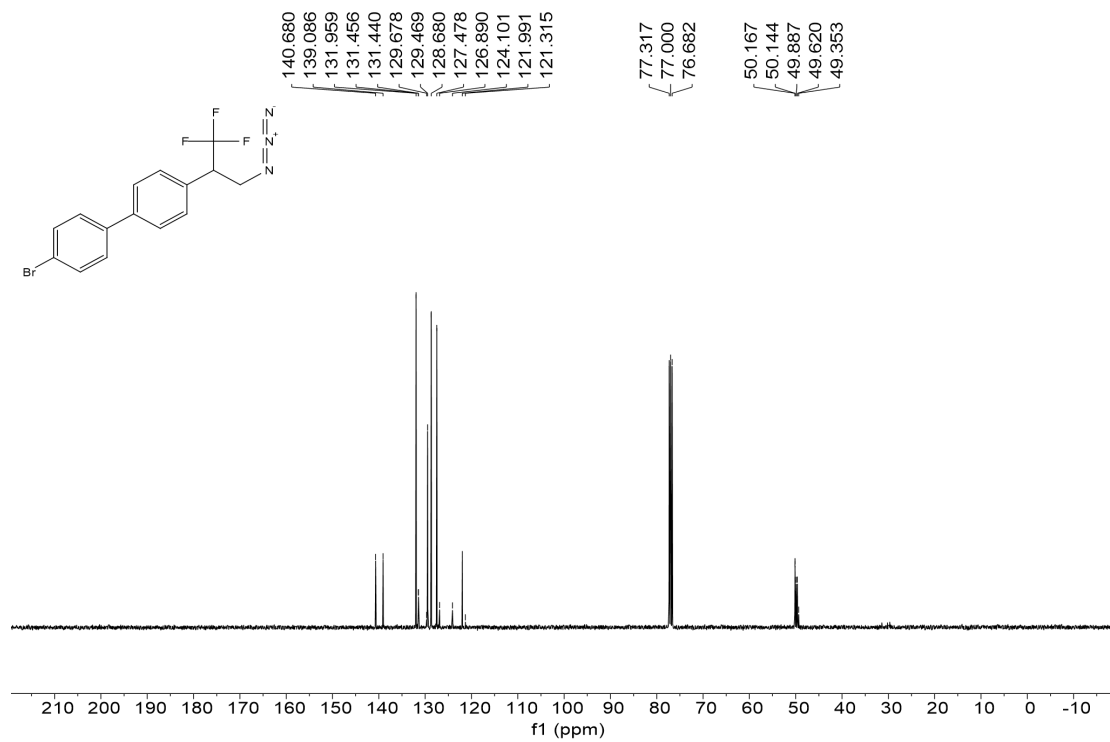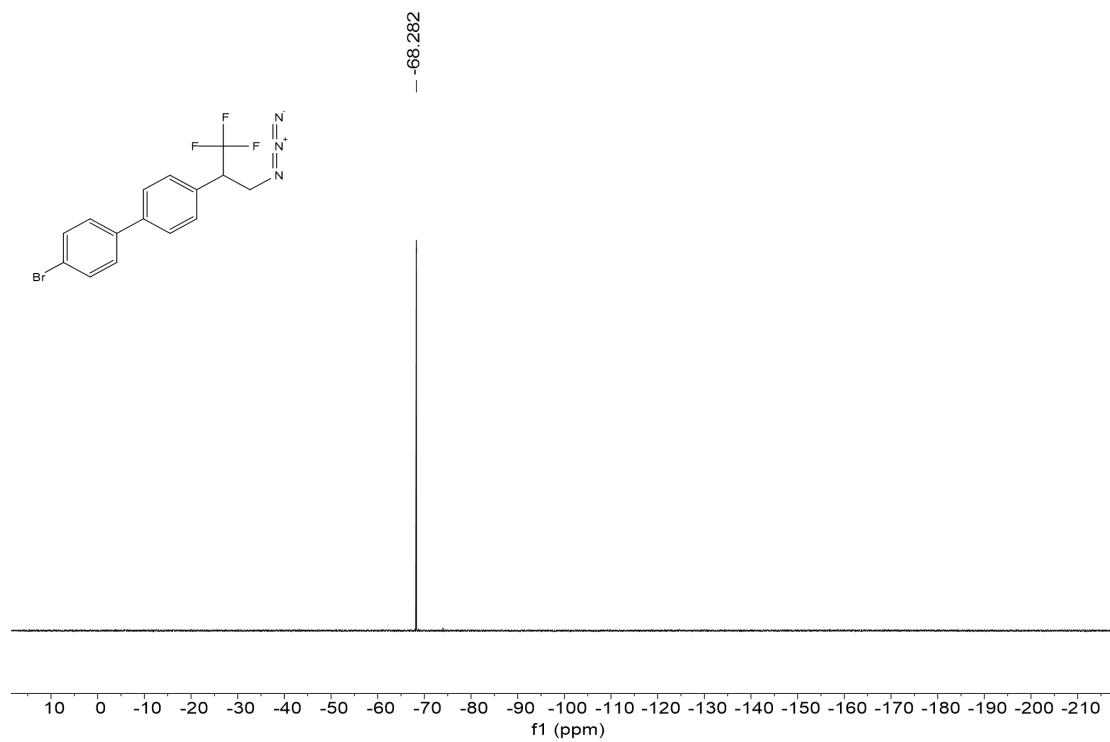



$^1\text{H}$  (400 MHz,  $\text{CDCl}_3$ ),  $^{13}\text{C}$  (101 MHz,  $\text{CDCl}_3$ ) and  $^{19}\text{F}$  (376 MHz,  $\text{CDCl}_3$ ) NMR spectrum of compound **12**

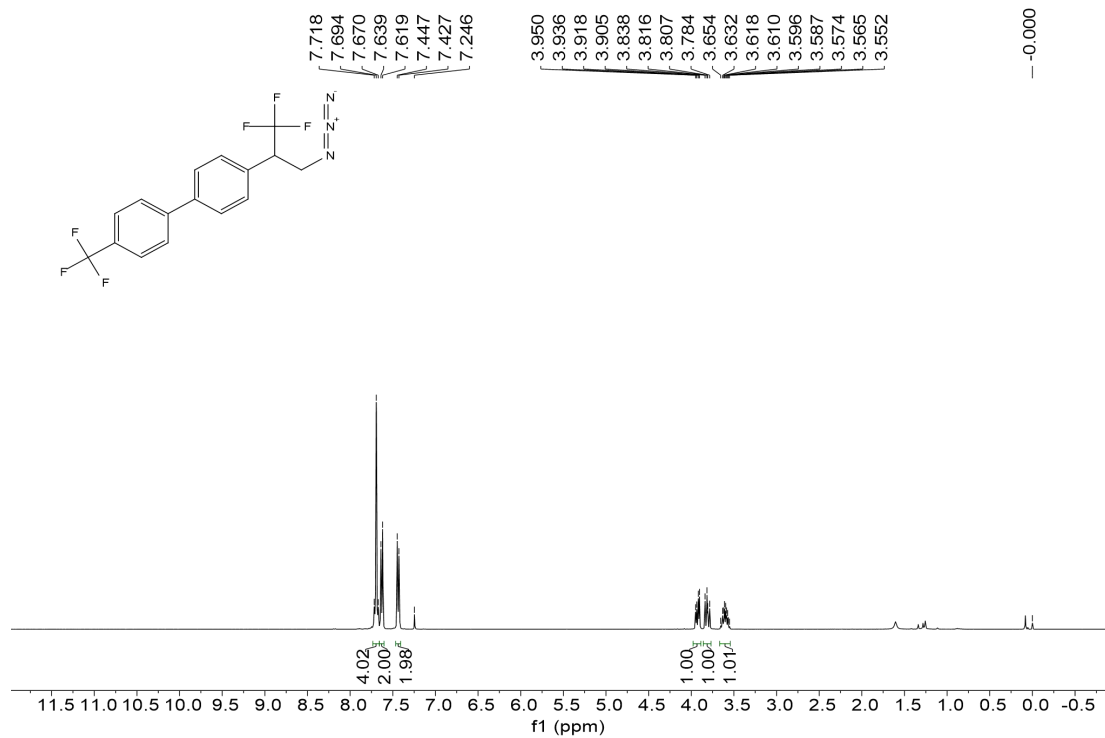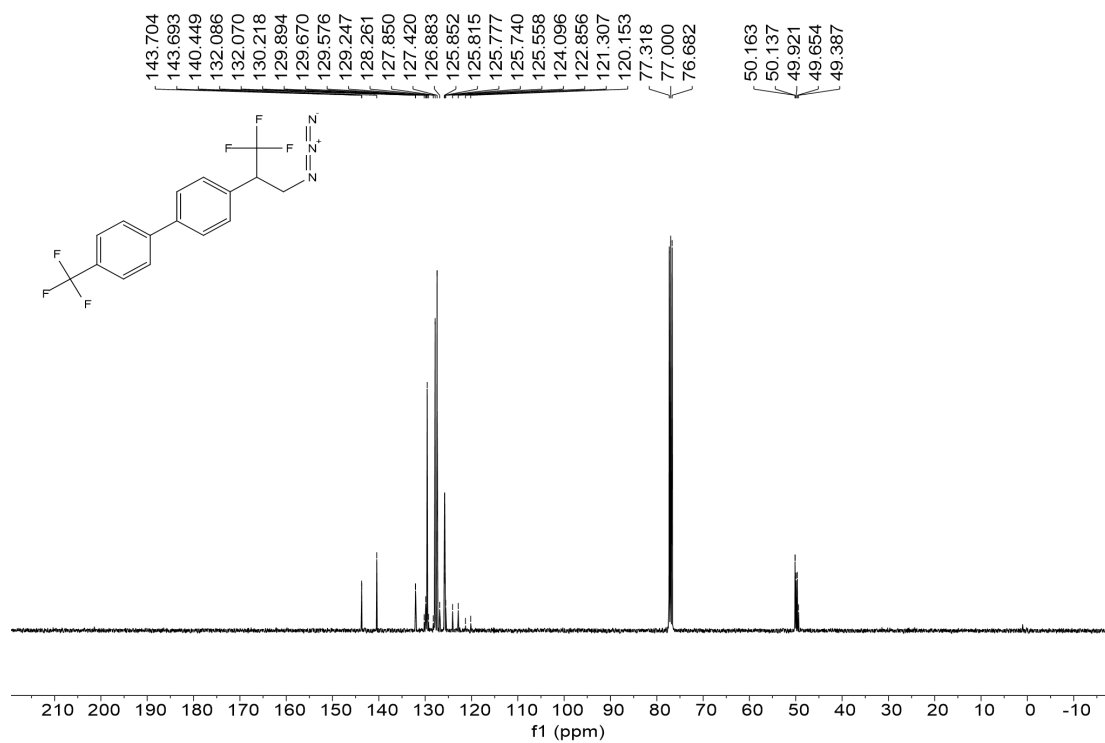

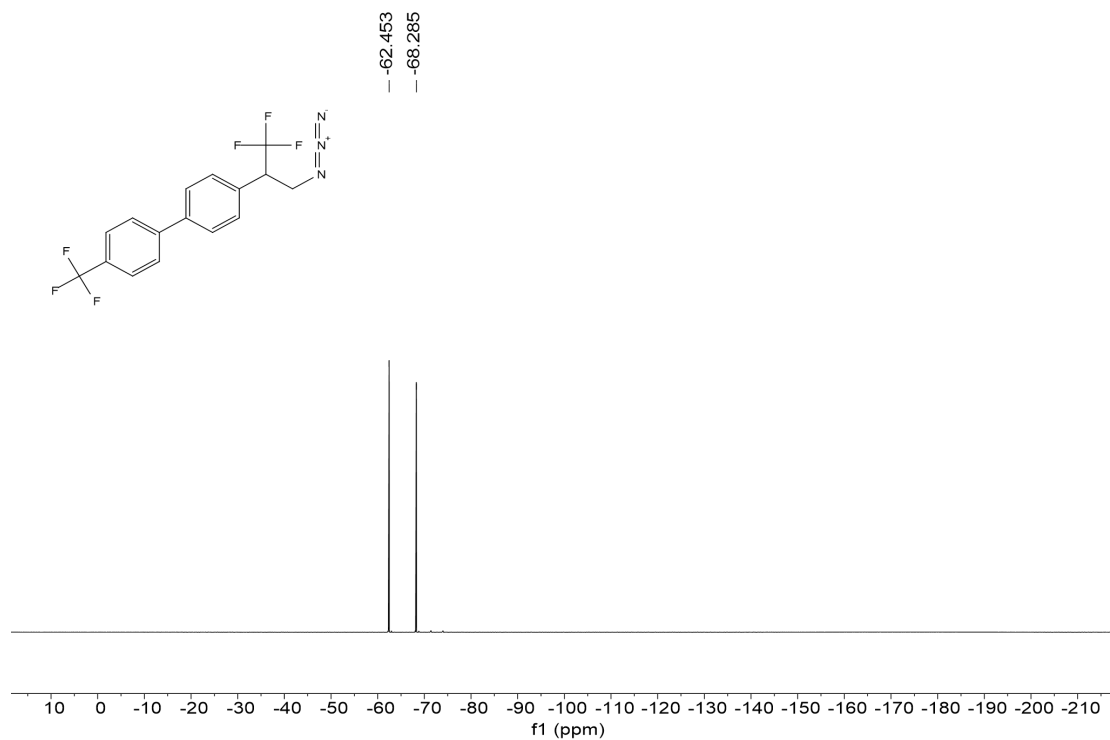

$^1\text{H}$  (400 MHz,  $\text{CDCl}_3$ ),  $^{13}\text{C}$  (101 MHz,  $\text{CDCl}_3$ ) and  $^{19}\text{F}$  (376 MHz,  $\text{CDCl}_3$ ) NMR spectrum of compound **13**

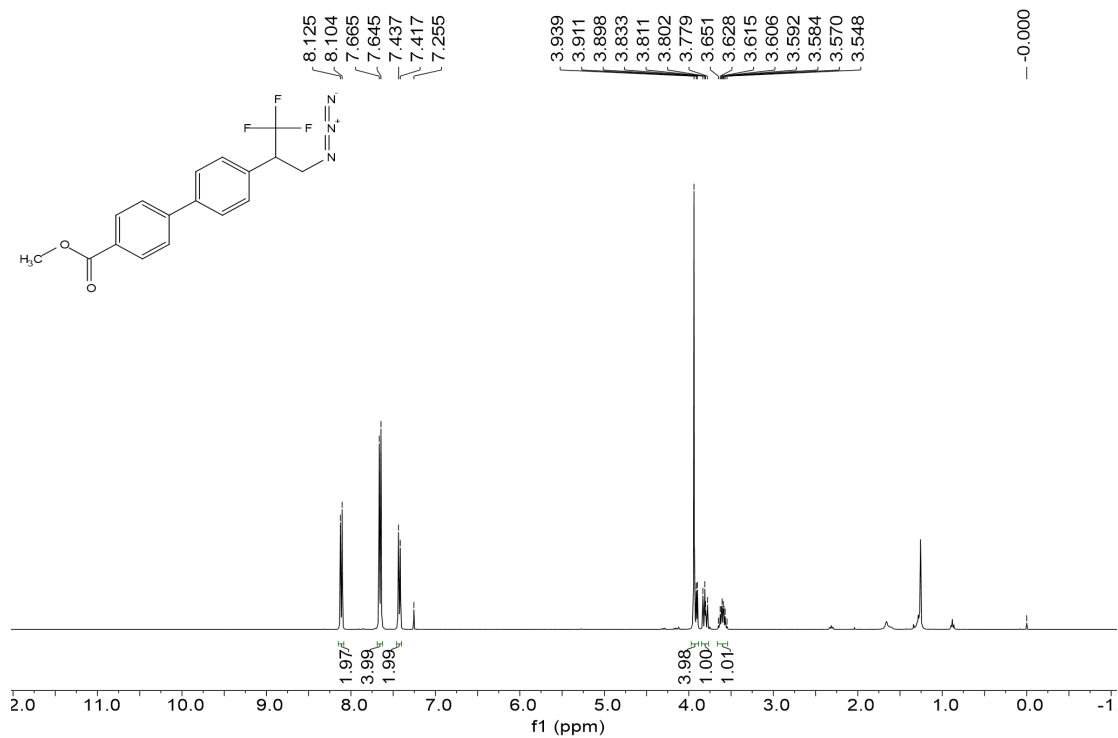

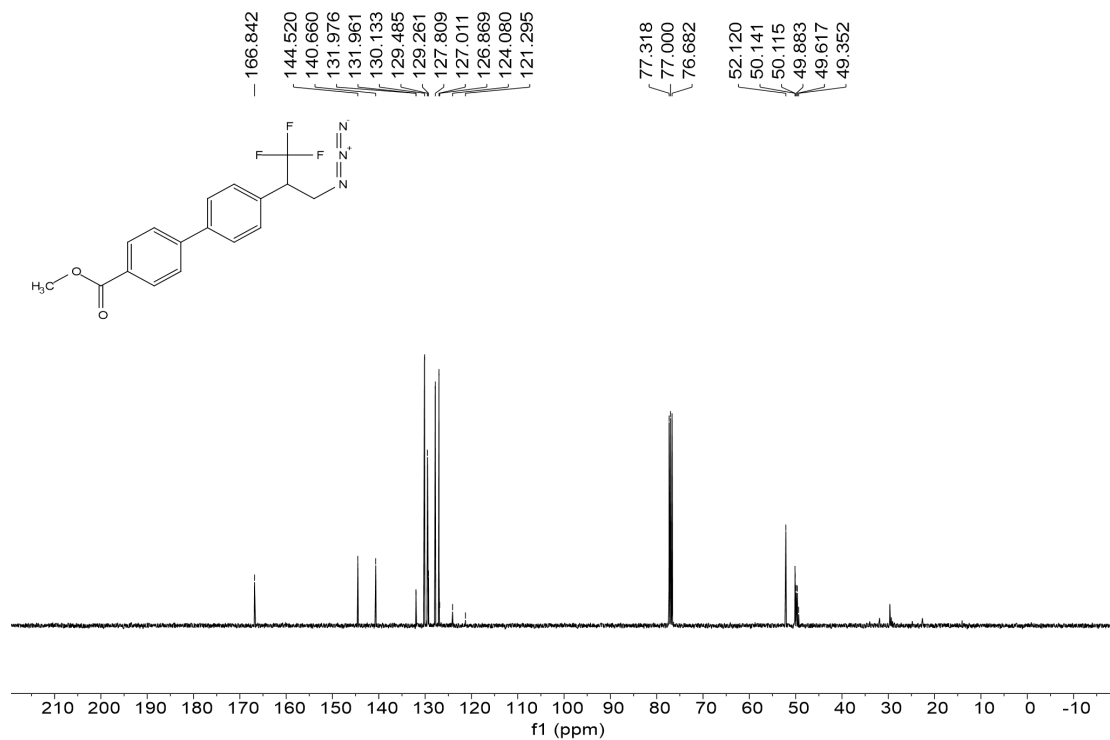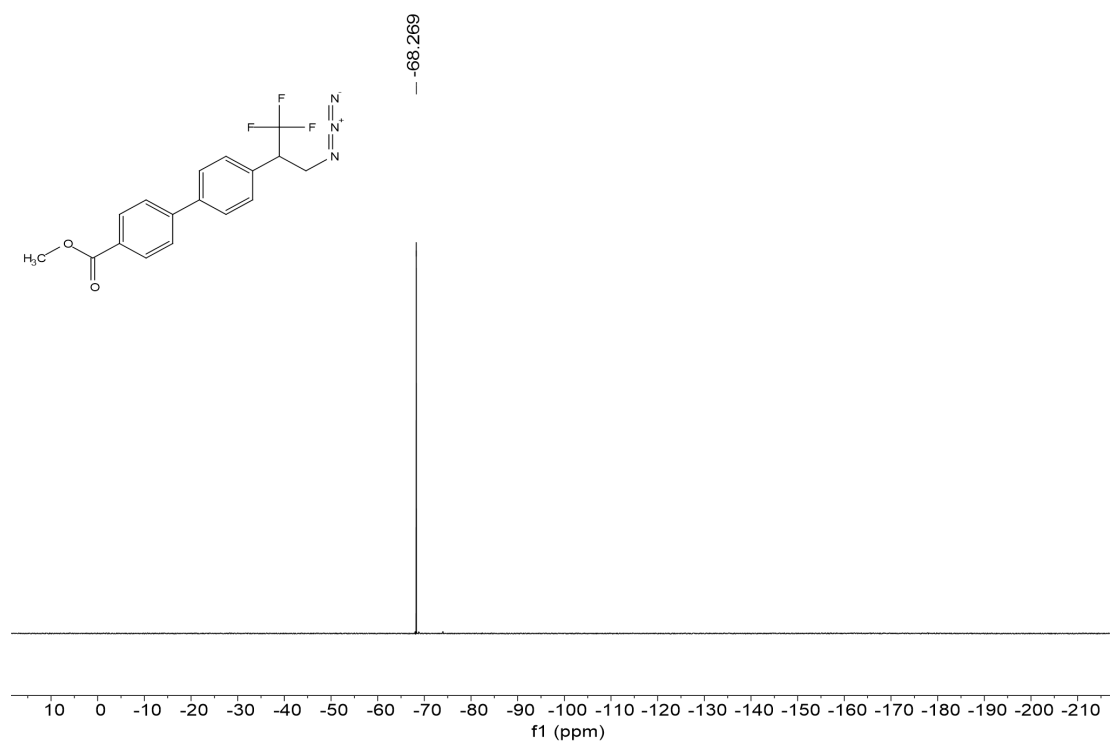

$^1\text{H}$  (400 MHz,  $\text{CDCl}_3$ ),  $^{13}\text{C}$  (101 MHz,  $\text{CDCl}_3$ ) and  $^{19}\text{F}$  (376 MHz,  $\text{CDCl}_3$ ) NMR spectrum of compound **14**

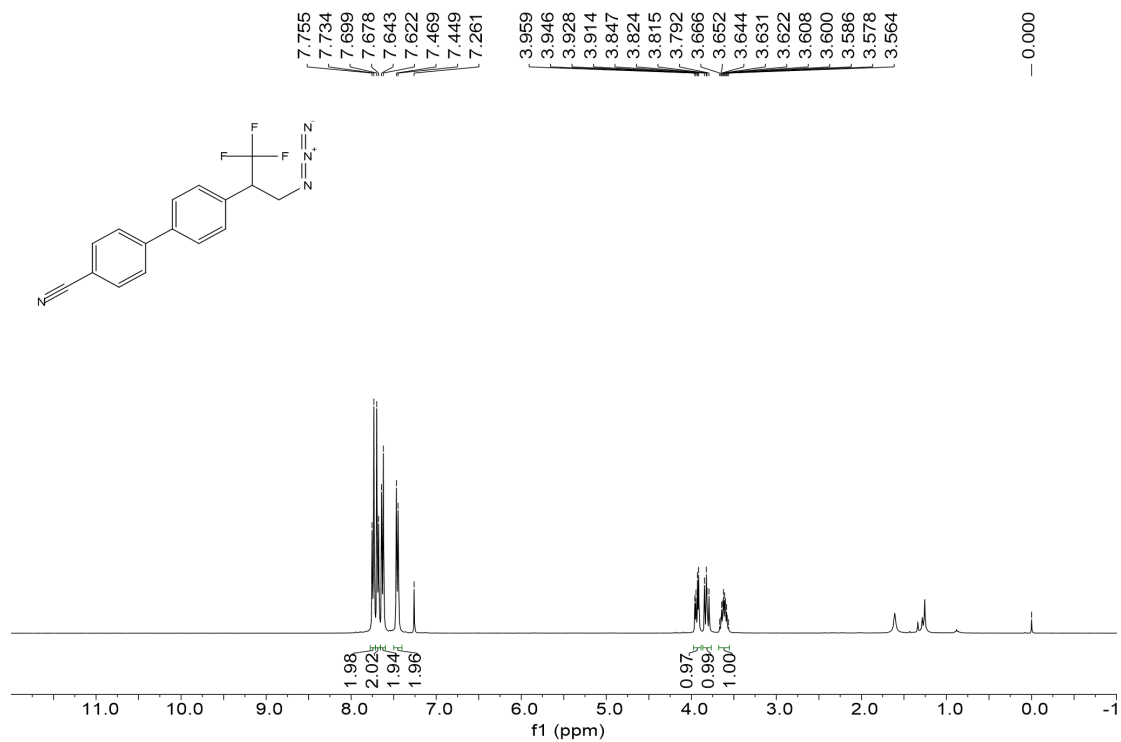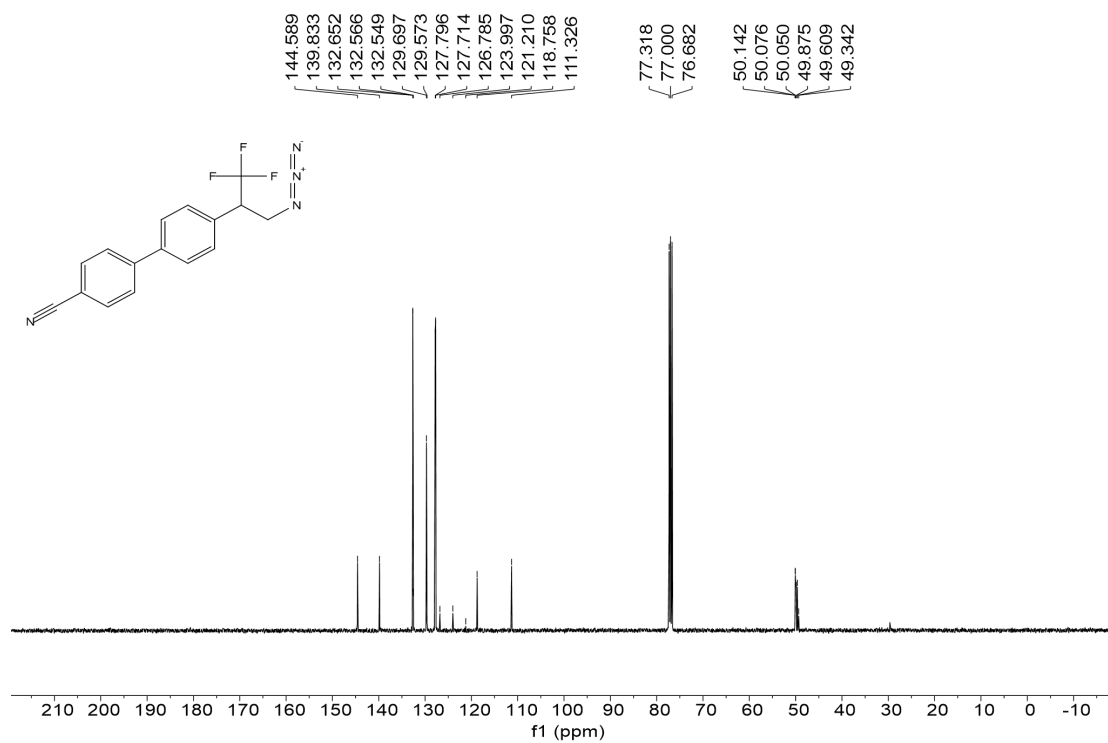

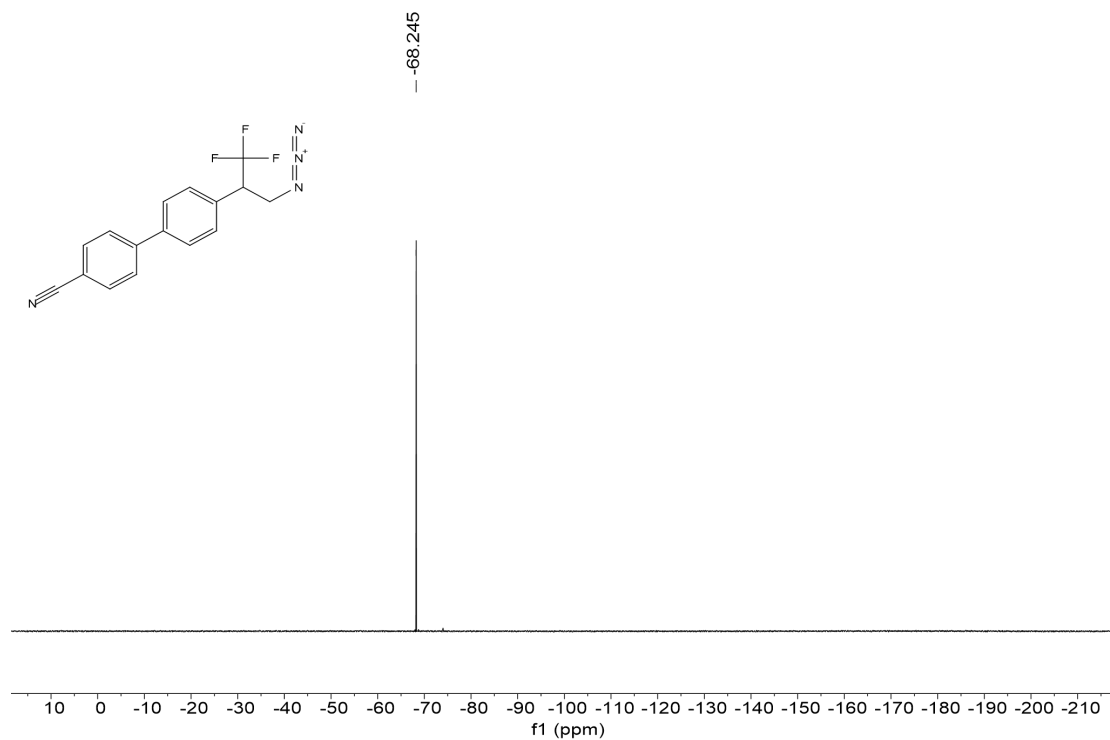

$^1\text{H}$  (400 MHz,  $\text{CDCl}_3$ ),  $^{13}\text{C}$  (101 MHz,  $\text{CDCl}_3$ ) and  $^{19}\text{F}$  (376 MHz,  $\text{CDCl}_3$ ) NMR spectrum of compound **15**

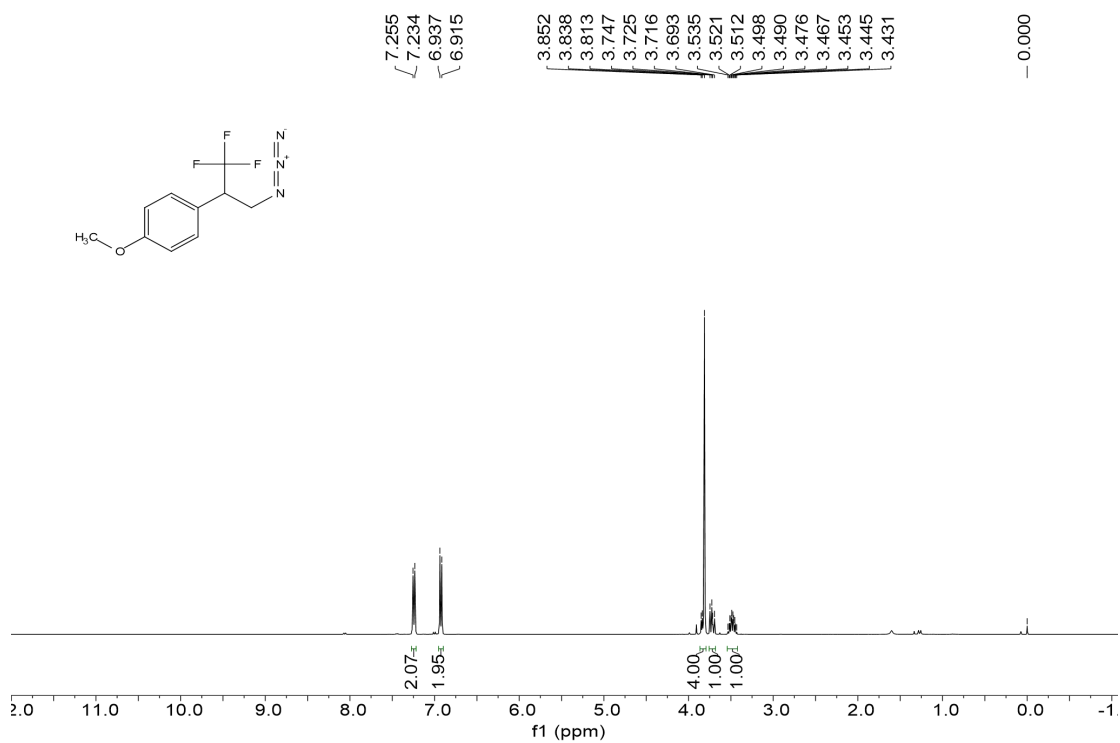

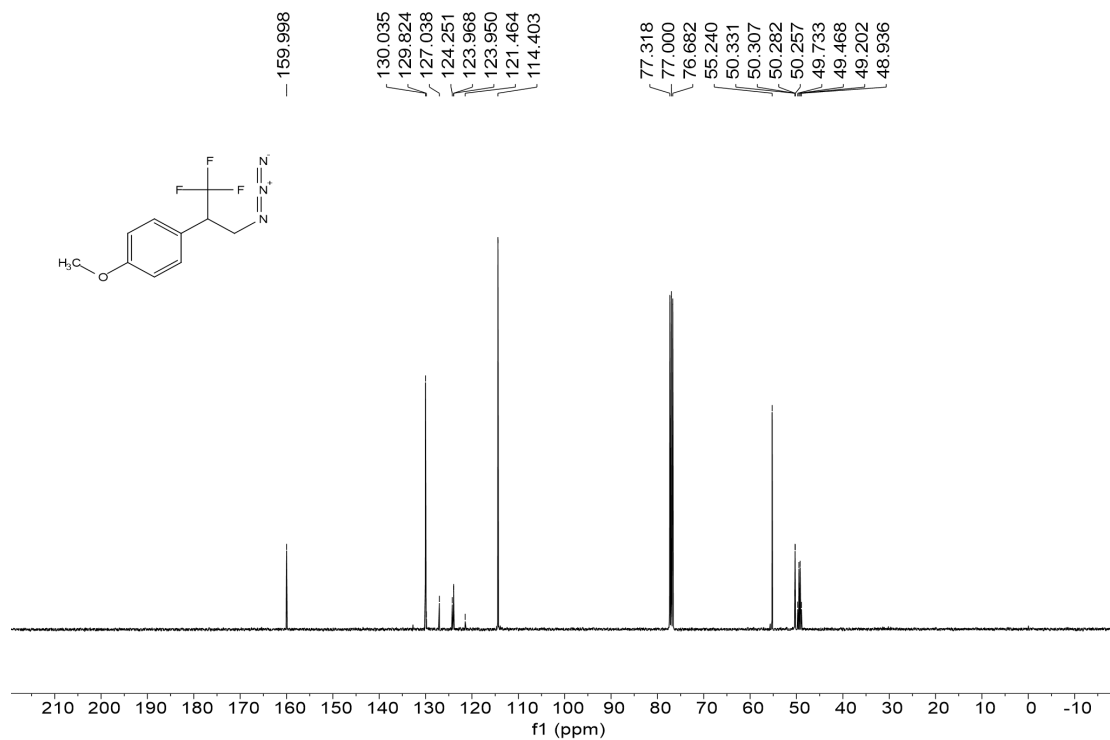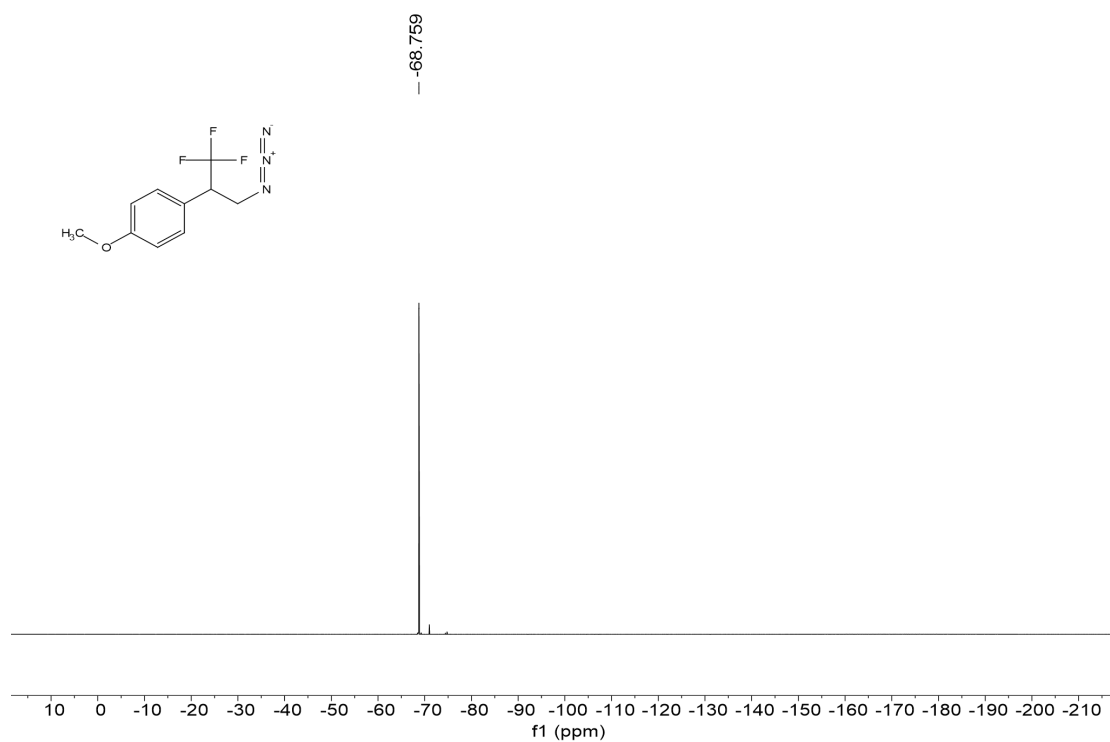

$^1\text{H}$  (400 MHz,  $\text{CDCl}_3$ ),  $^{13}\text{C}$  (101 MHz,  $\text{CDCl}_3$ ) and  $^{19}\text{F}$  (376 MHz,  $\text{CDCl}_3$ ) NMR spectrum of compound **16**

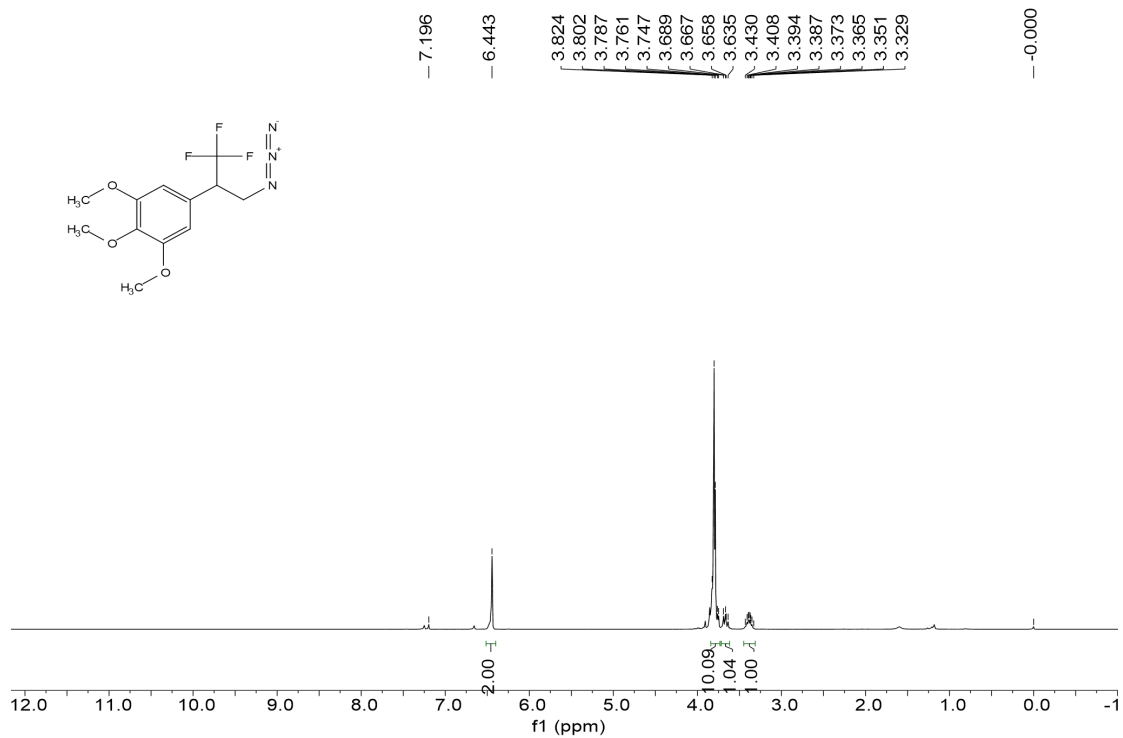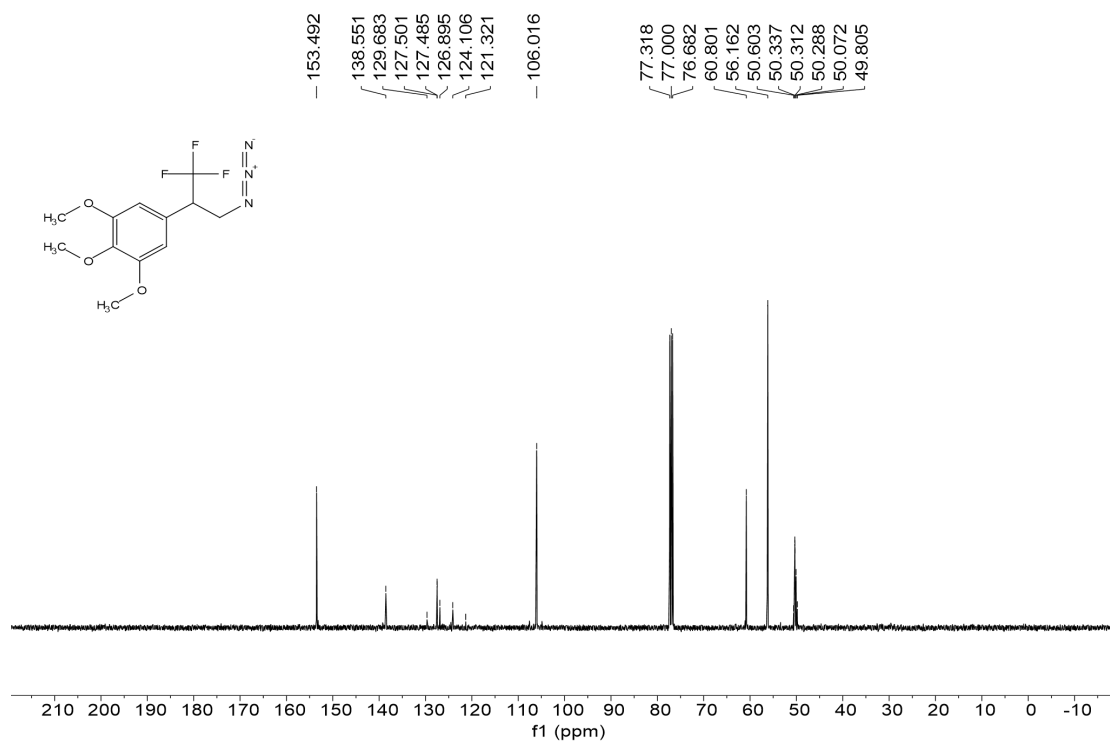

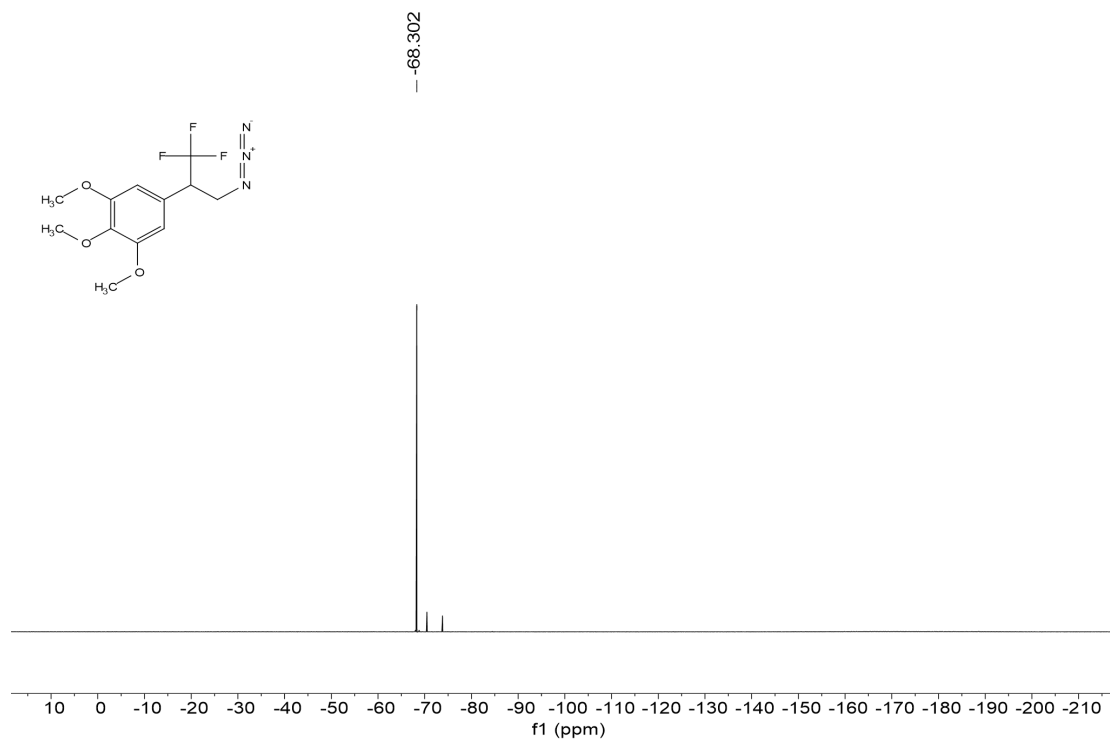

$^1\text{H}$  (400 MHz,  $\text{CDCl}_3$ ),  $^{13}\text{C}$  (101 MHz,  $\text{CDCl}_3$ ) and  $^{19}\text{F}$  (376 MHz,  $\text{CDCl}_3$ ) NMR spectrum of compound 17

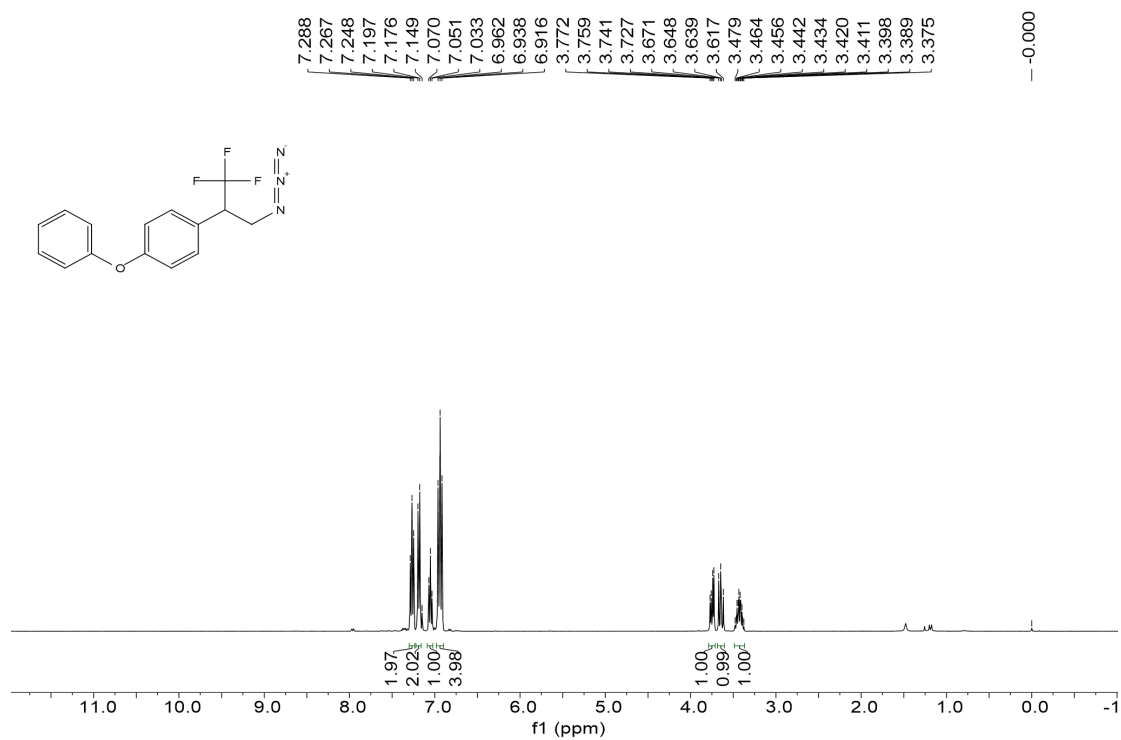



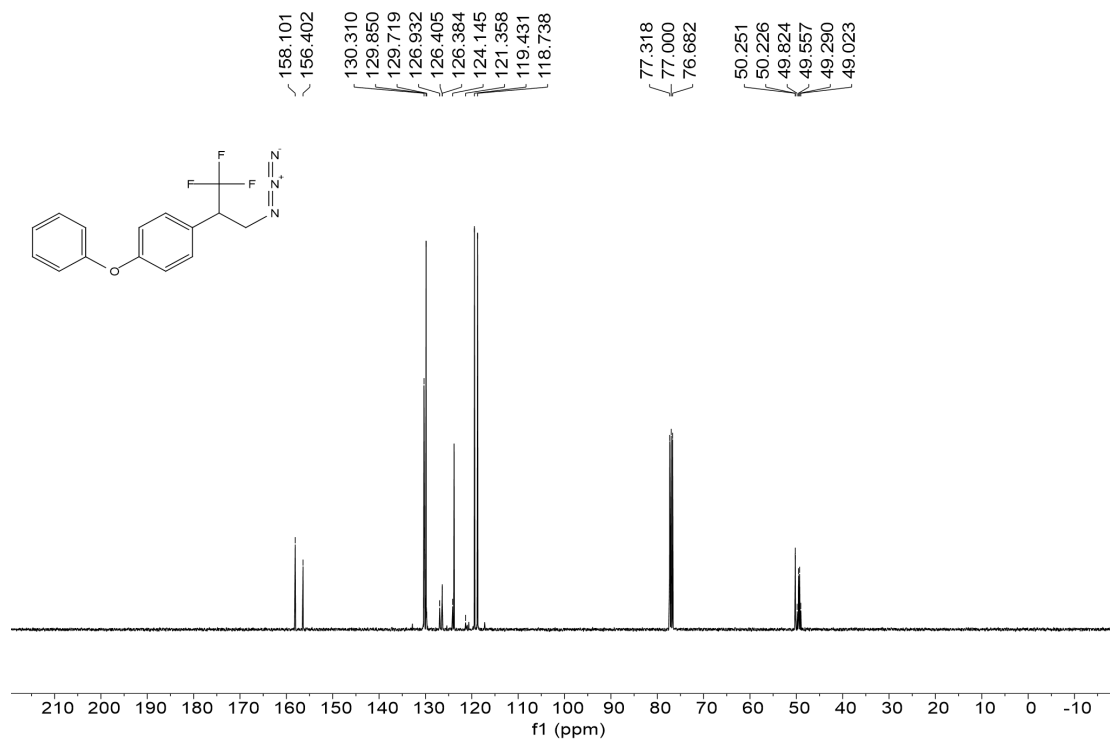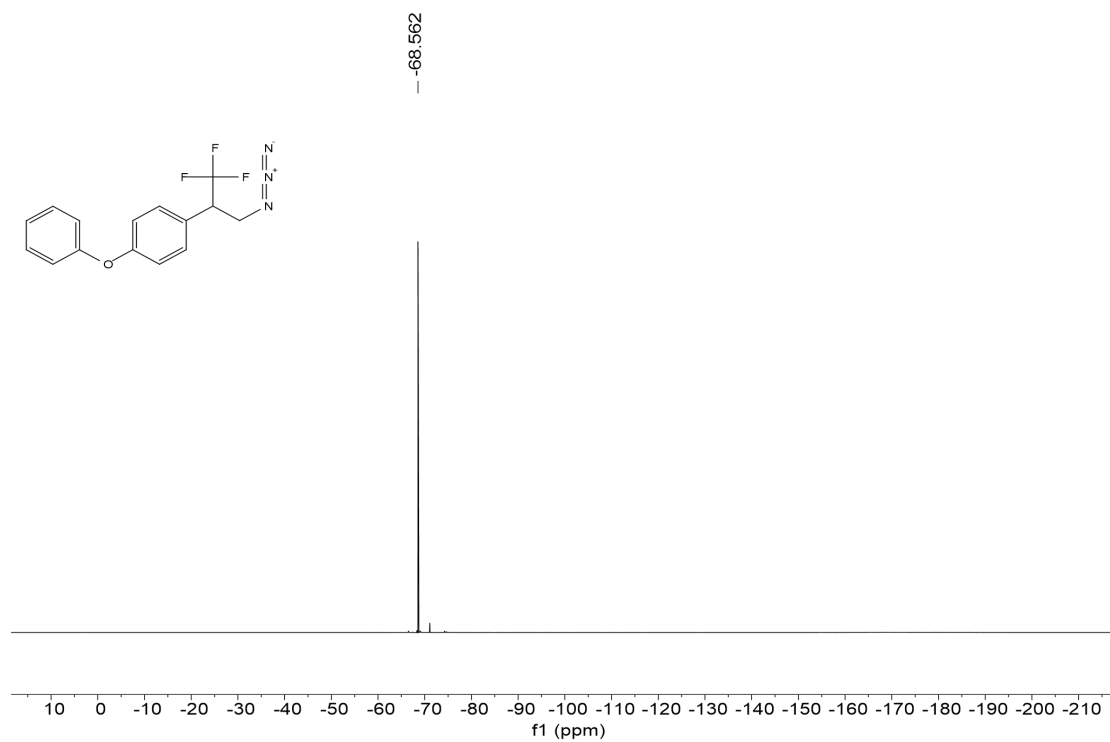

$^1\text{H}$  (400 MHz,  $\text{CDCl}_3$ ),  $^{13}\text{C}$  (101 MHz,  $\text{CDCl}_3$ ) and  $^{19}\text{F}$  (376 MHz,  $\text{CDCl}_3$ ) NMR spectrum of compound **18**

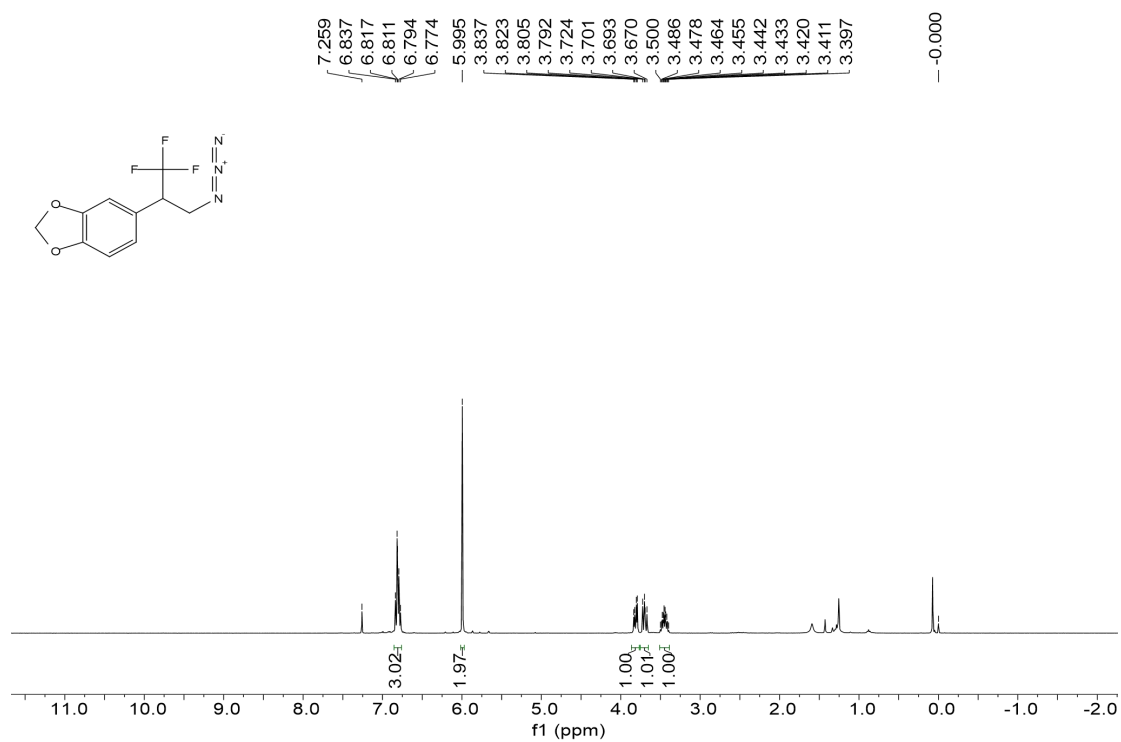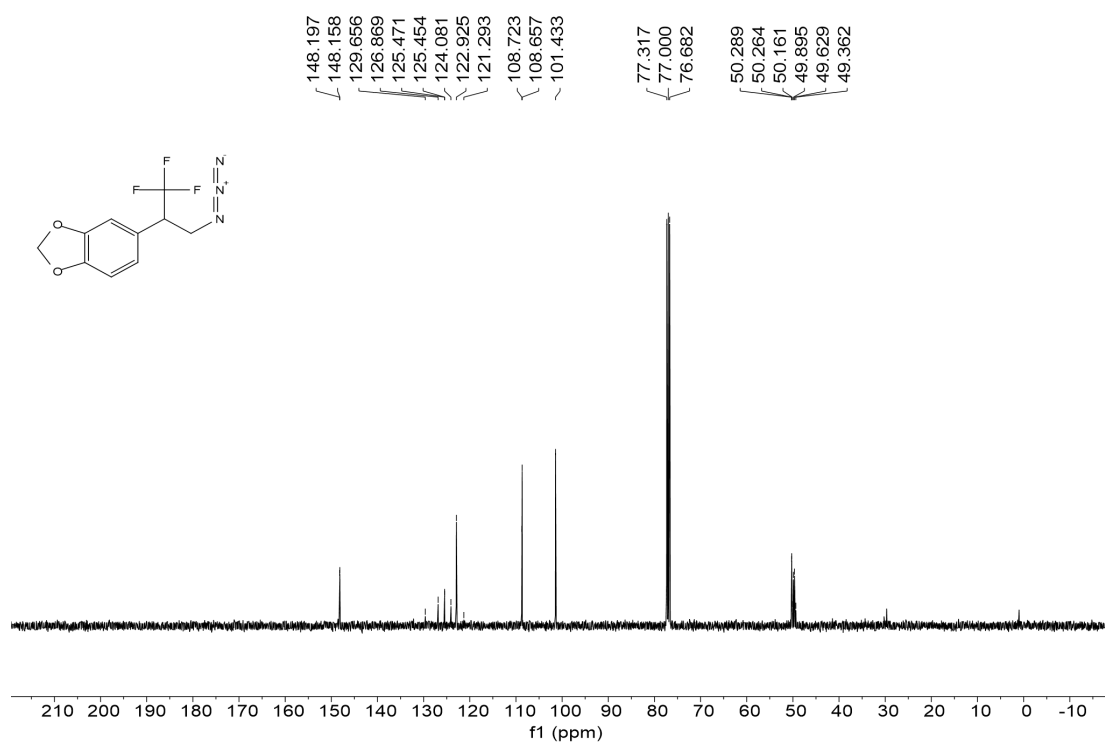

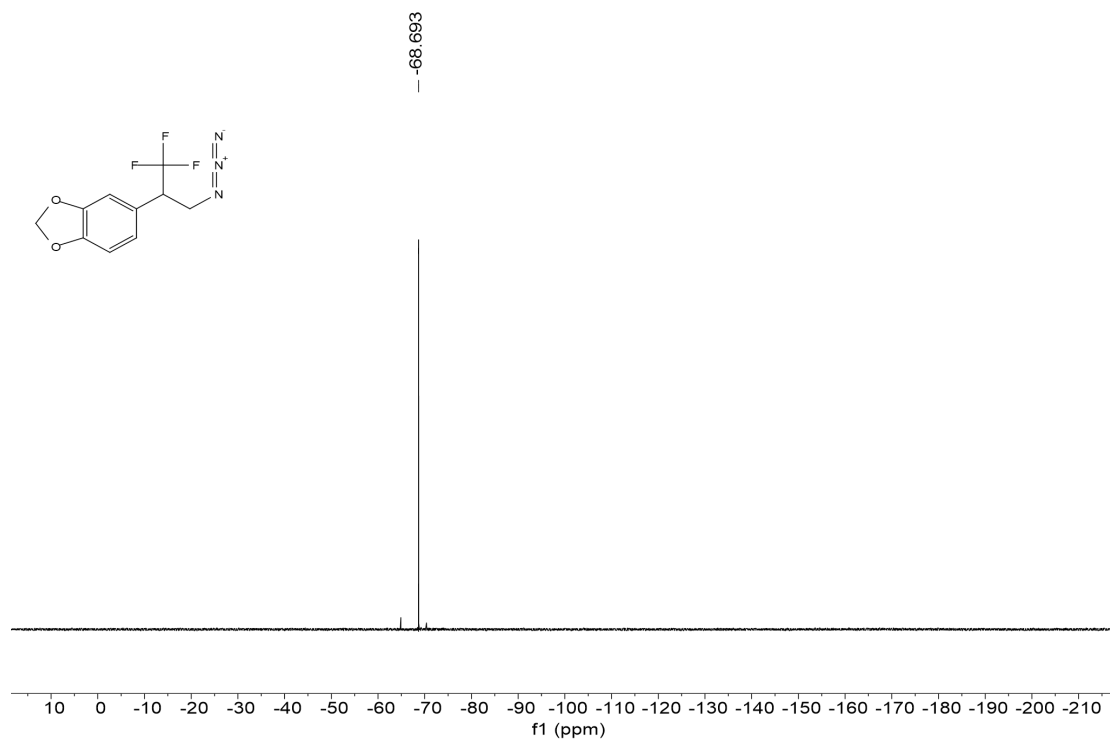

$^1\text{H}$  (400 MHz,  $\text{CDCl}_3$ ),  $^{13}\text{C}$  (101 MHz,  $\text{CDCl}_3$ ) and  $^{19}\text{F}$  (376 MHz,  $\text{CDCl}_3$ ) NMR spectrum of compound **19**

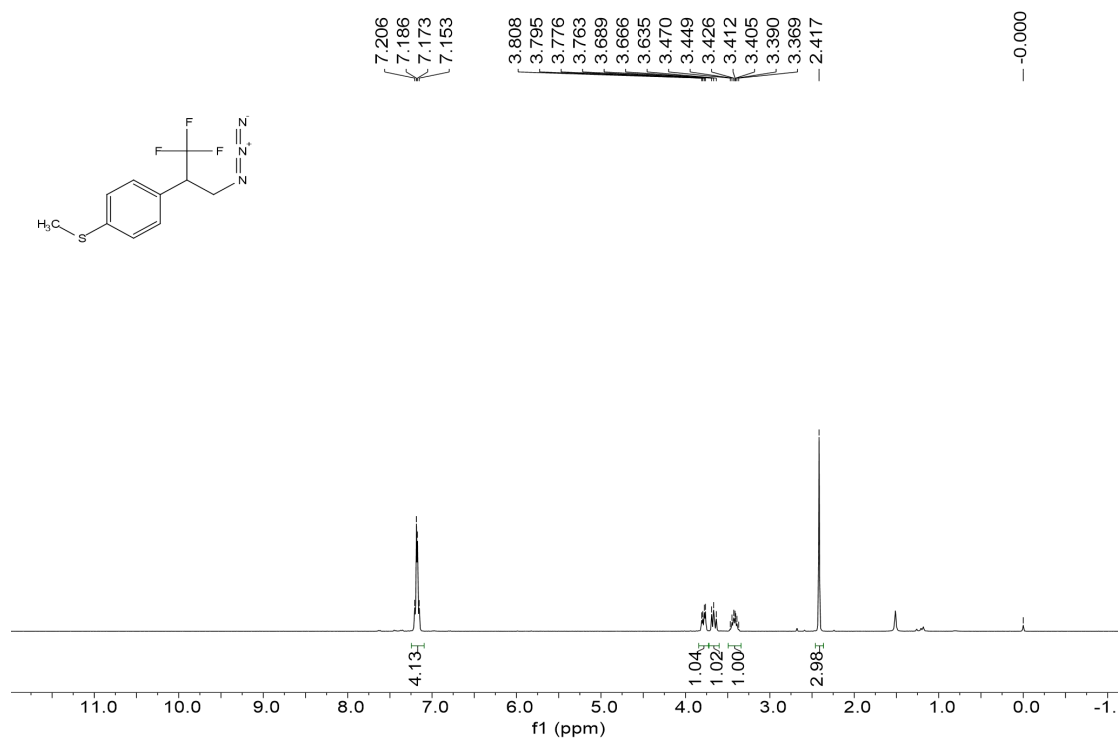

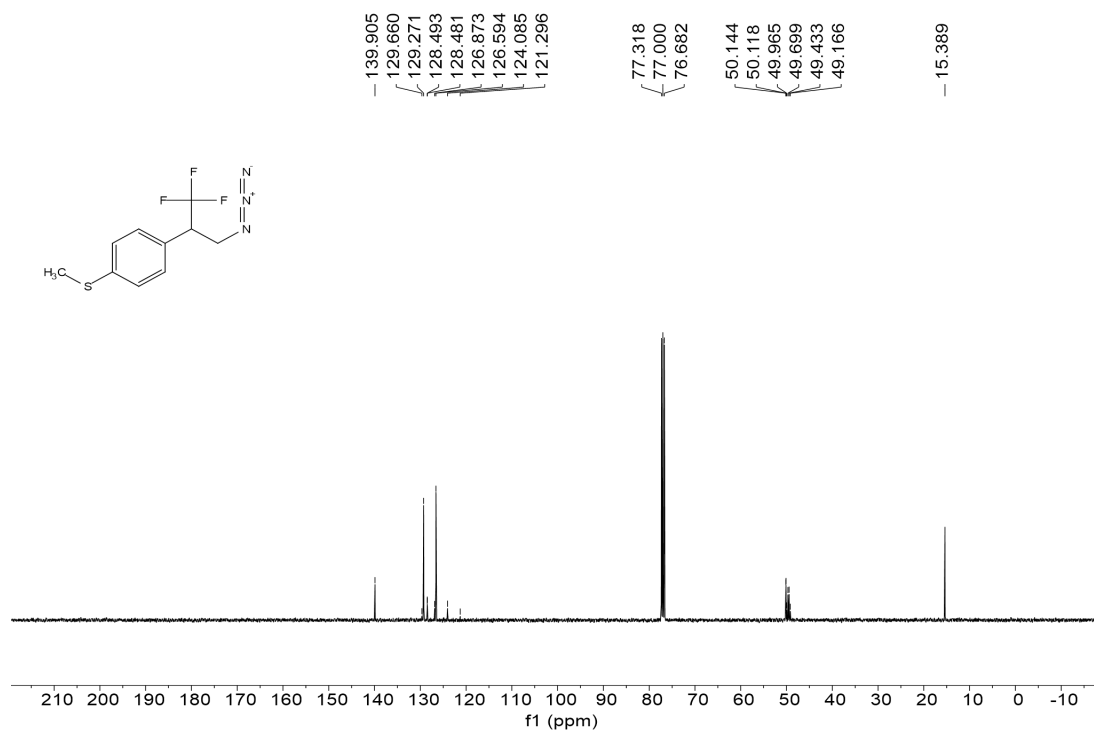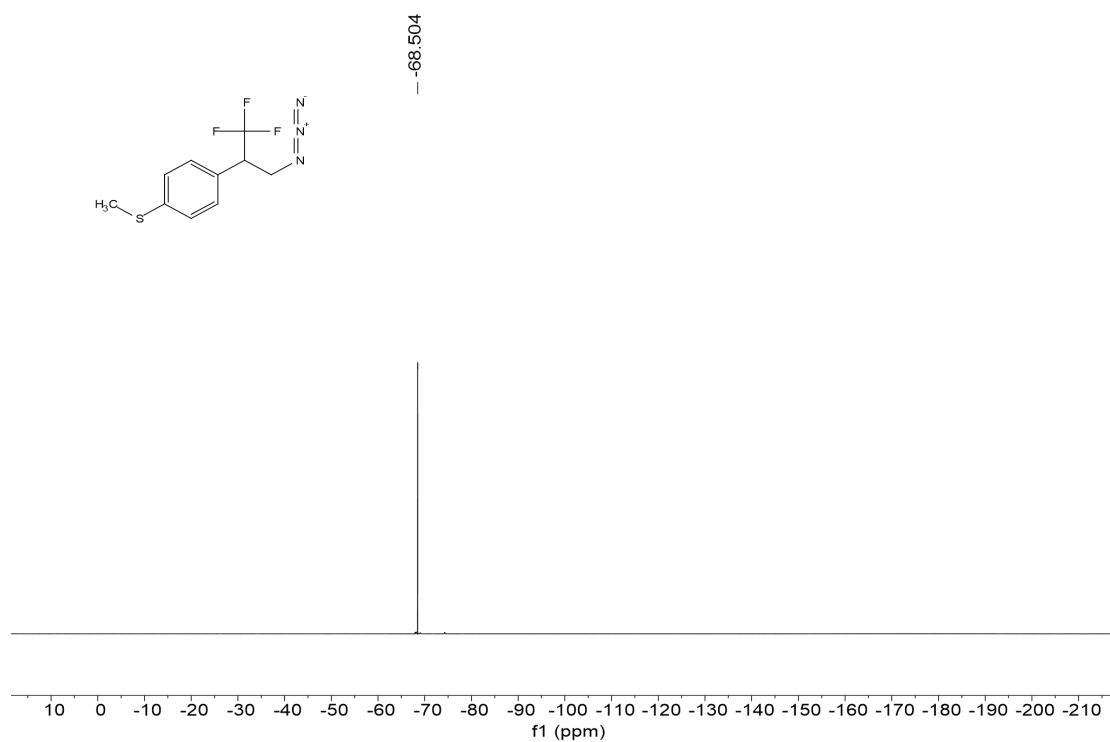

$^1\text{H}$  (400 MHz,  $\text{CDCl}_3$ ),  $^{13}\text{C}$  (101 MHz,  $\text{CDCl}_3$ ) and  $^{19}\text{F}$  (376 MHz,  $\text{CDCl}_3$ ) NMR spectrum of compound **20**

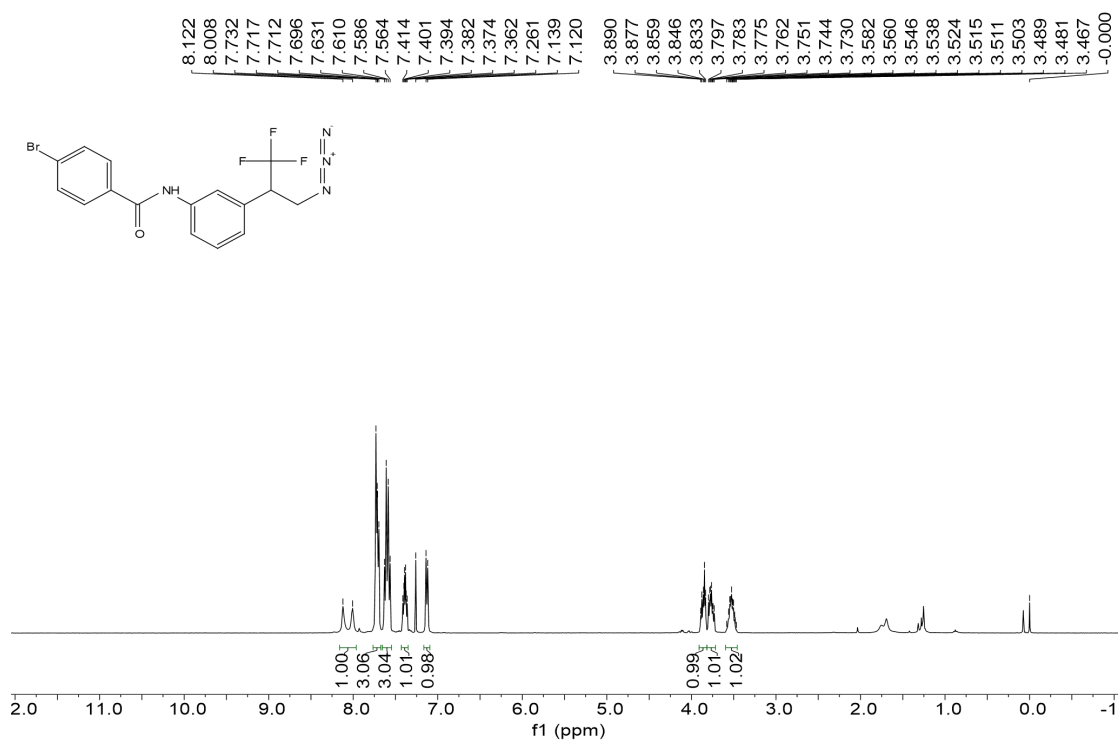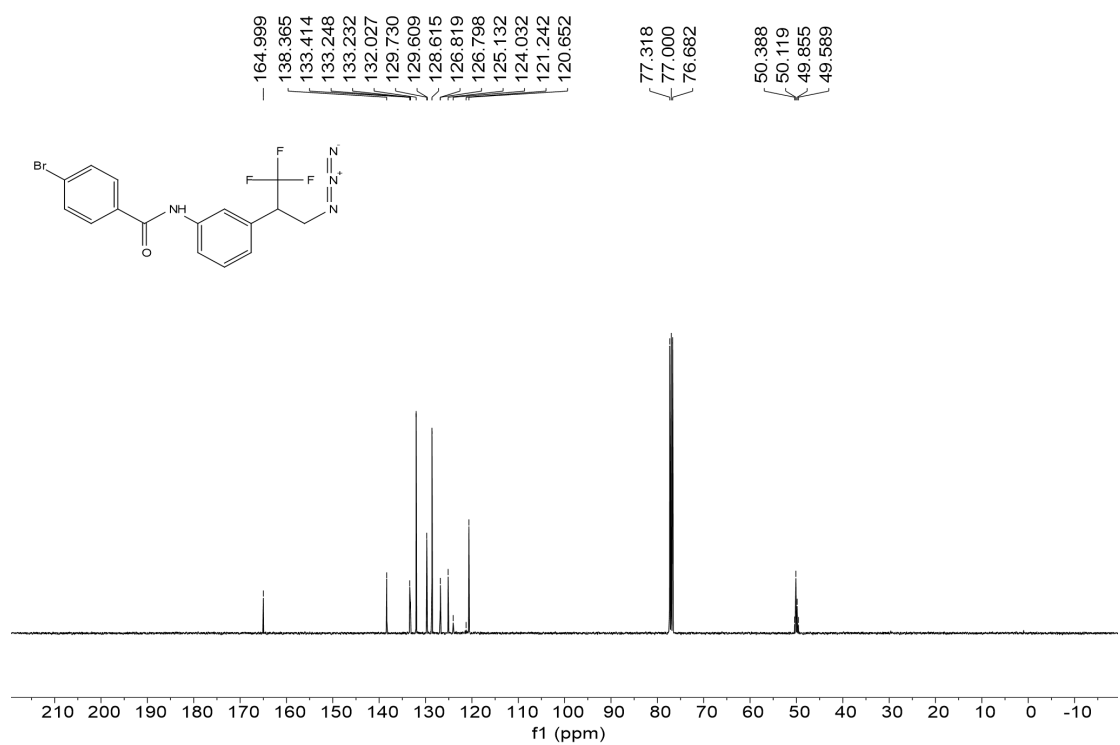

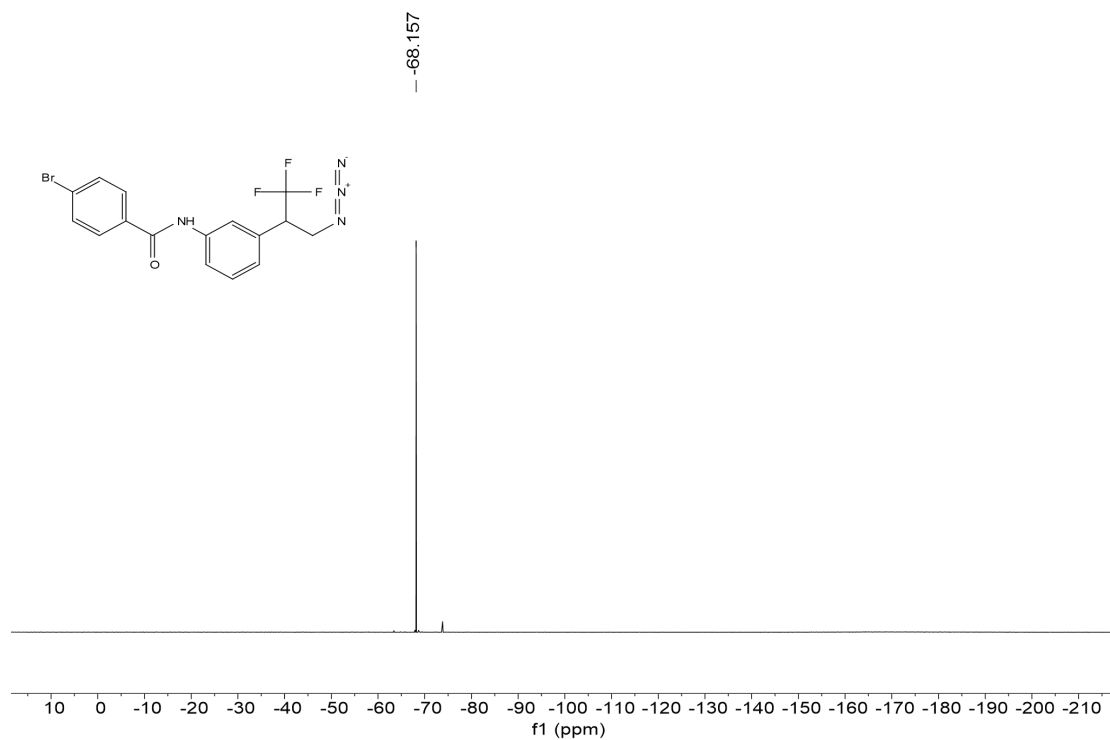

$^1\text{H}$  (400 MHz,  $\text{CDCl}_3$ ),  $^{13}\text{C}$  (101 MHz,  $\text{CDCl}_3$ ) and  $^{19}\text{F}$  (376 MHz,  $\text{CDCl}_3$ ) NMR spectrum of compound **21**

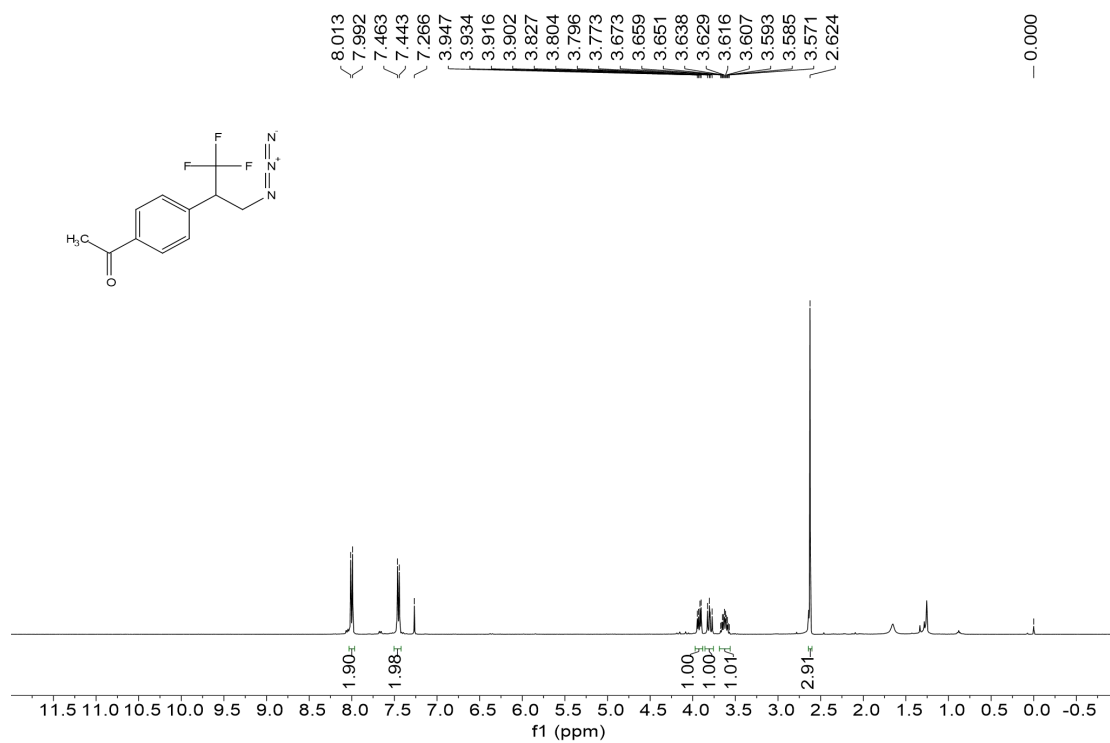

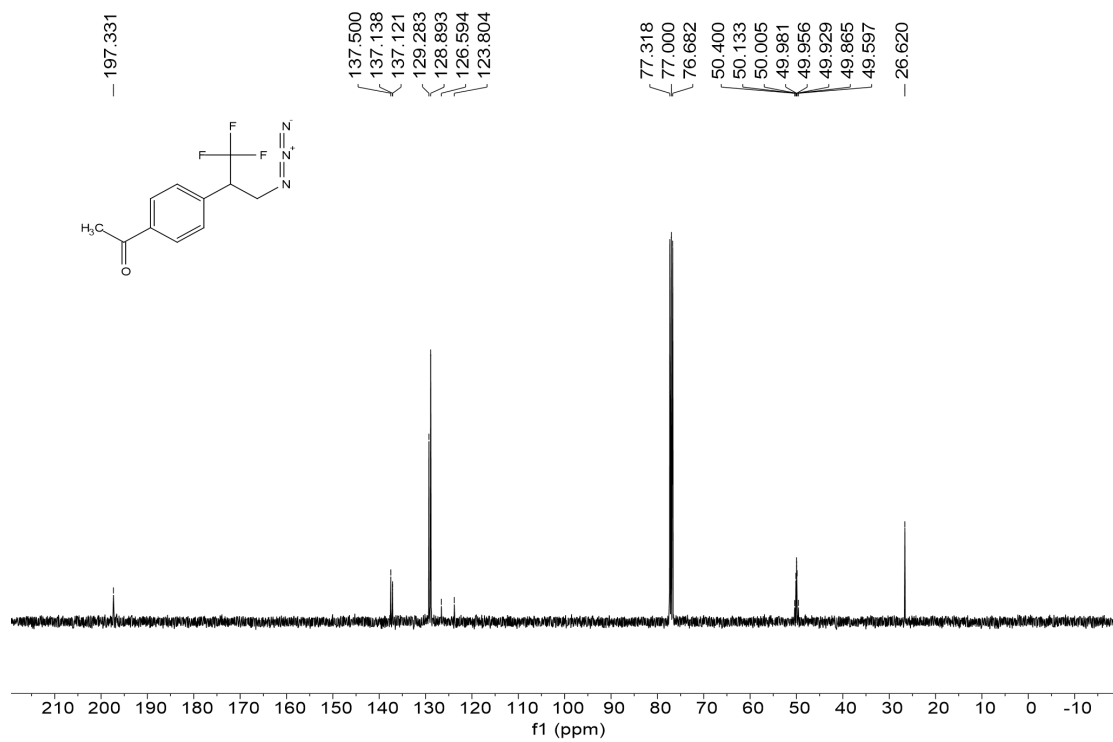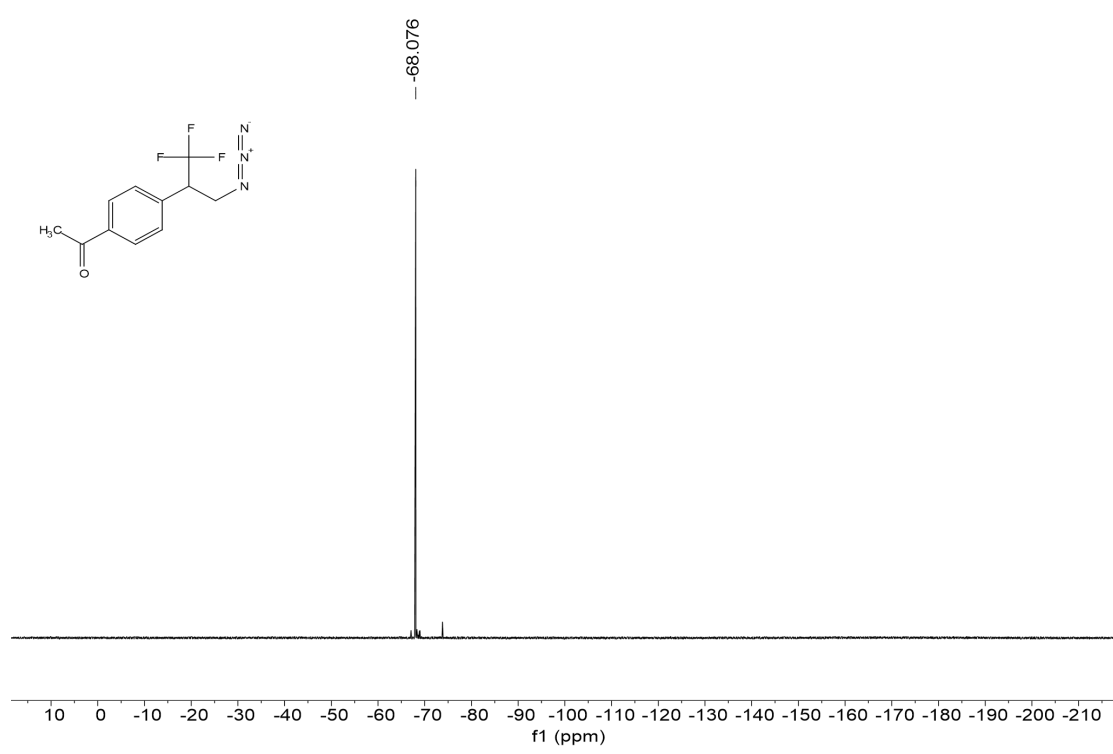

$^1\text{H}$  (400 MHz,  $\text{CDCl}_3$ ),  $^{13}\text{C}$  (101 MHz,  $\text{CDCl}_3$ ) and  $^{19}\text{F}$  (376 MHz,  $\text{CDCl}_3$ ) NMR spectrum of compound **22**

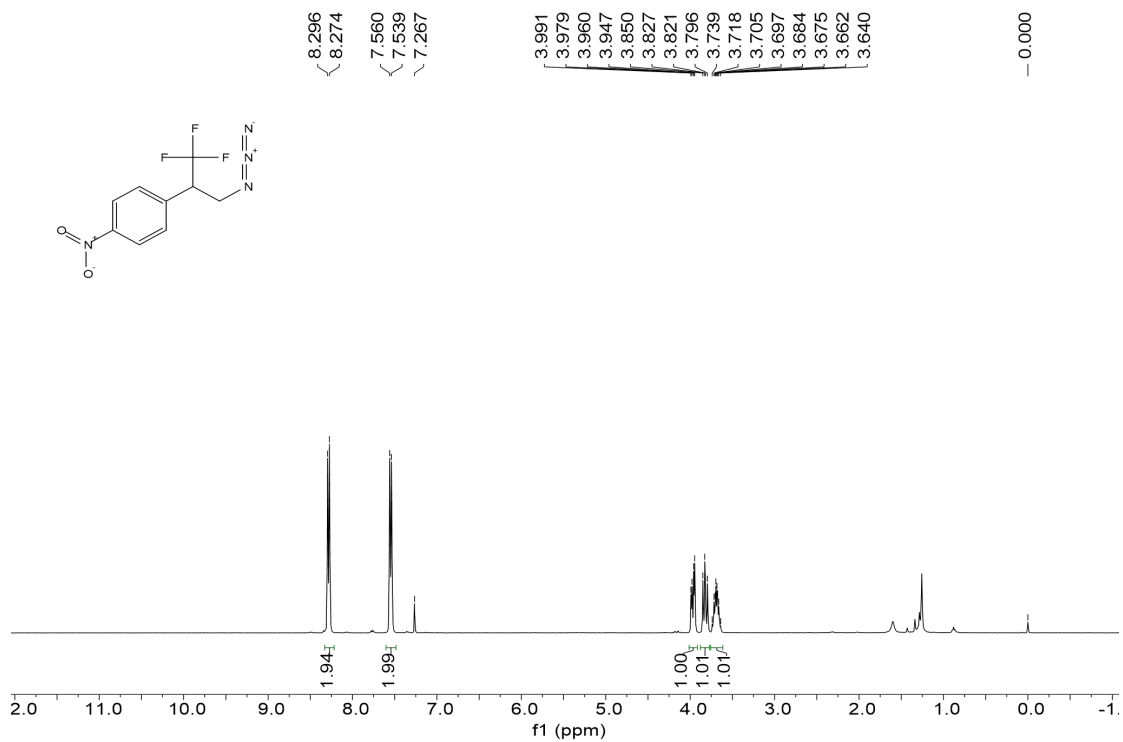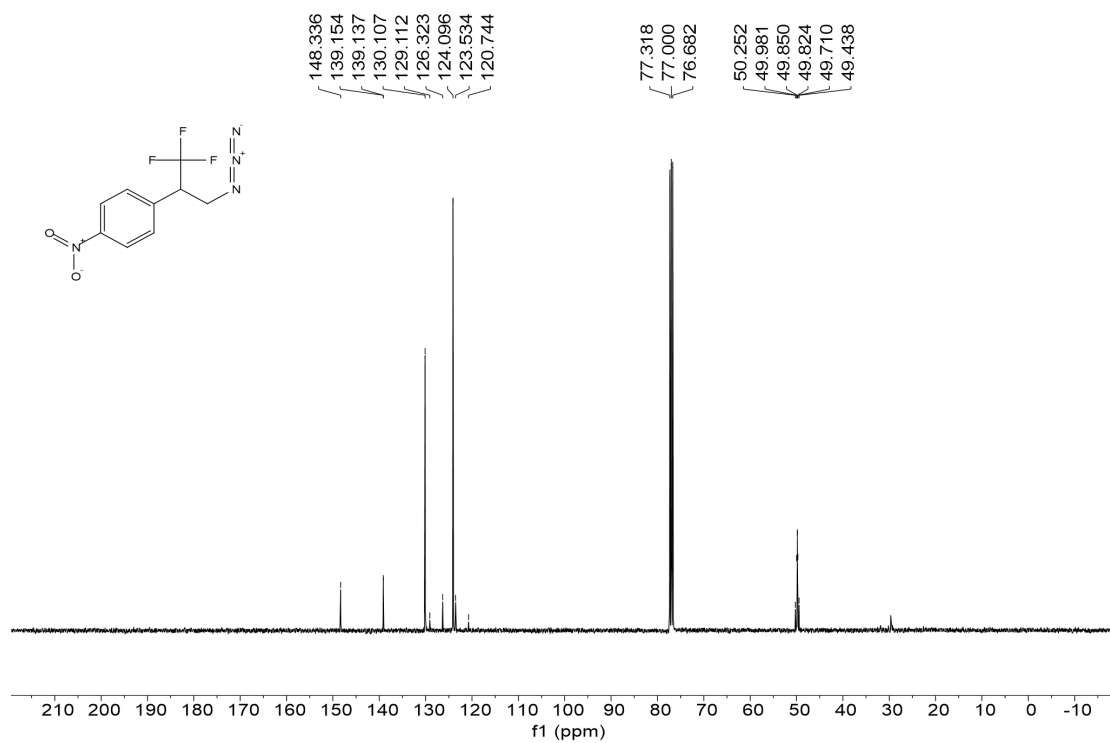



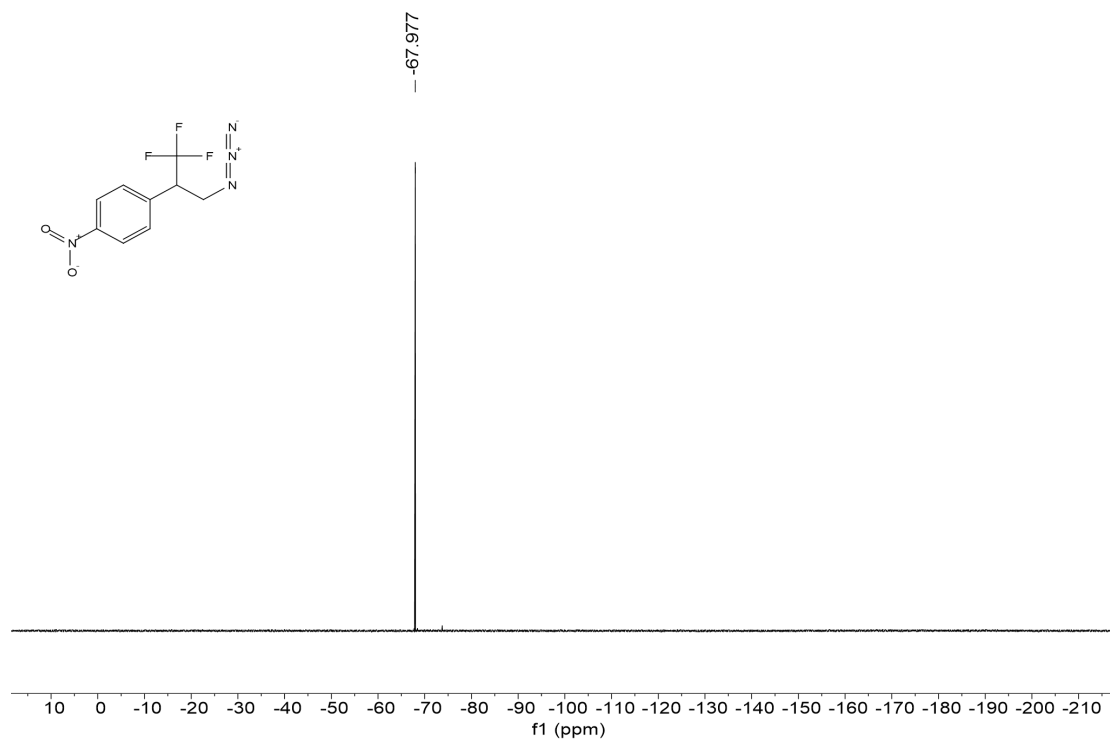

$^1\text{H}$  (400 MHz,  $\text{CDCl}_3$ ),  $^{13}\text{C}$  (101 MHz,  $\text{CDCl}_3$ ) and  $^{19}\text{F}$  (376 MHz,  $\text{CDCl}_3$ ) NMR spectrum of compound **23**

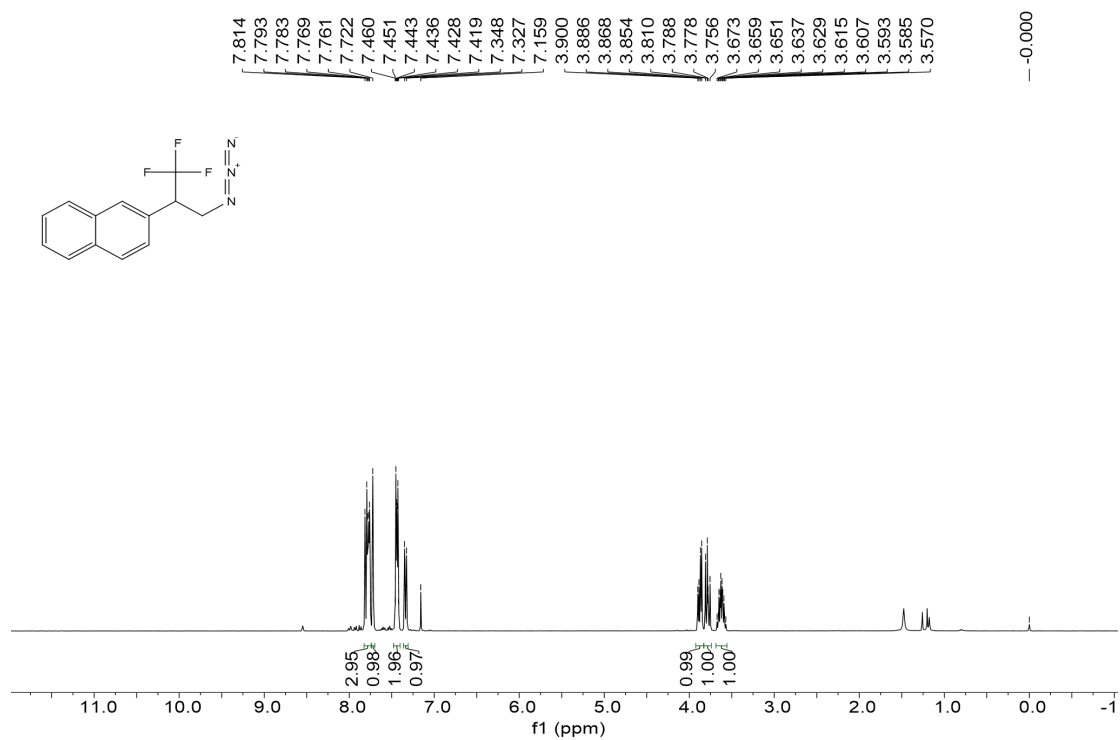

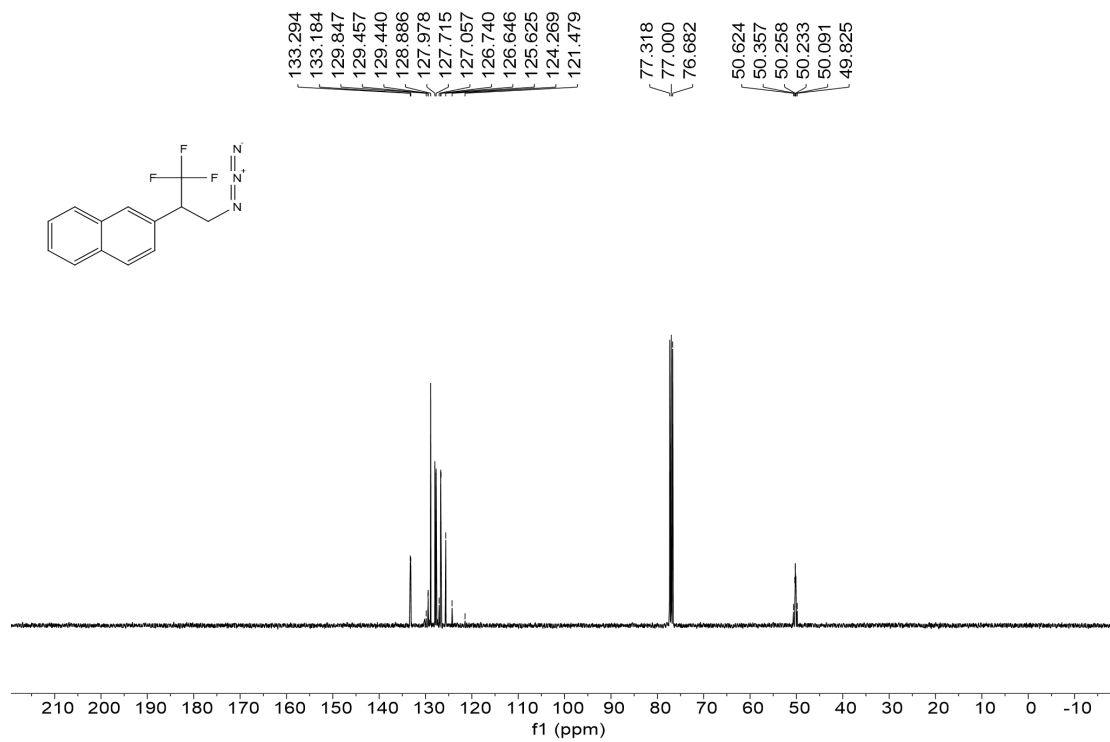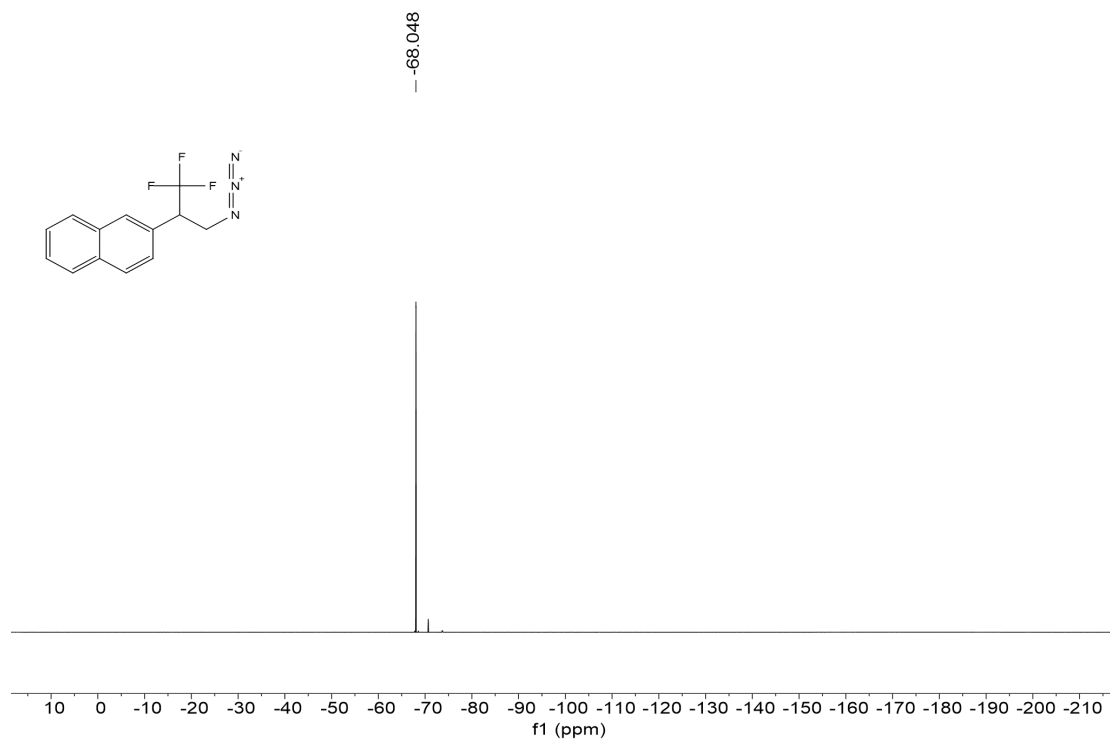

$^1\text{H}$  (400 MHz,  $\text{CDCl}_3$ ),  $^{13}\text{C}$  (101 MHz,  $\text{CDCl}_3$ ) and  $^{19}\text{F}$  (376 MHz,  $\text{CDCl}_3$ ) NMR spectrum of compound **24**

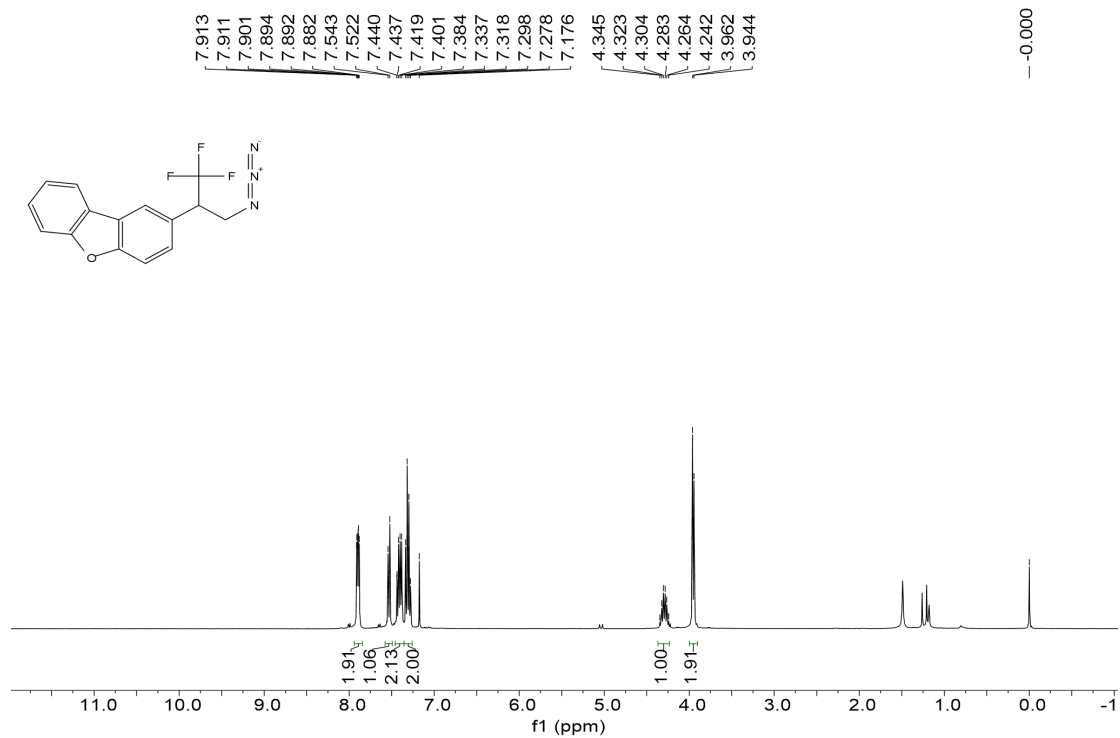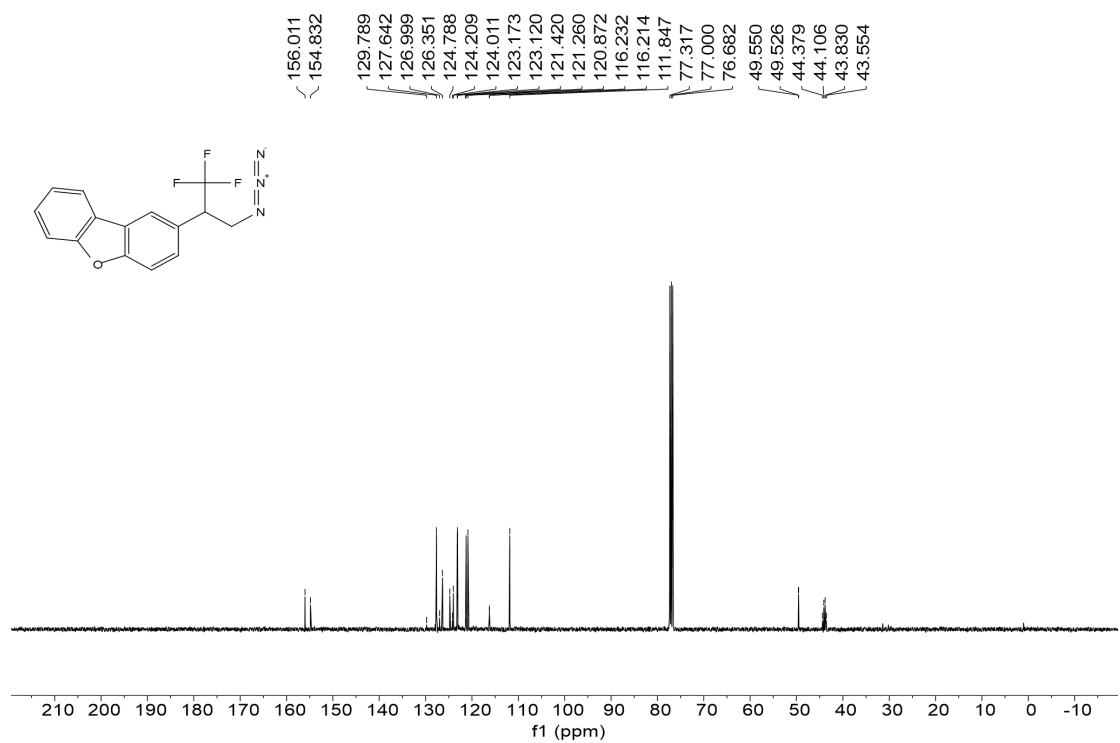

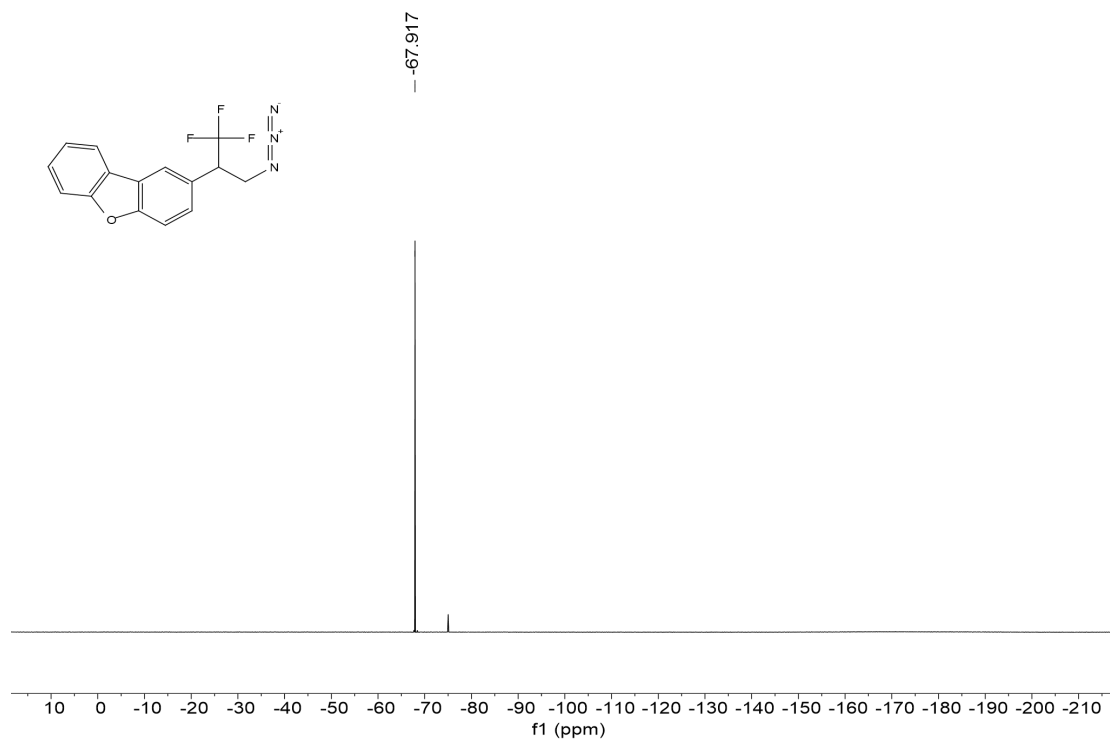

$^1\text{H}$  (400 MHz,  $\text{CDCl}_3$ ),  $^{13}\text{C}$  (101 MHz,  $\text{CDCl}_3$ ) and  $^{19}\text{F}$  (376 MHz,  $\text{CDCl}_3$ ) NMR spectrum of compound **28**

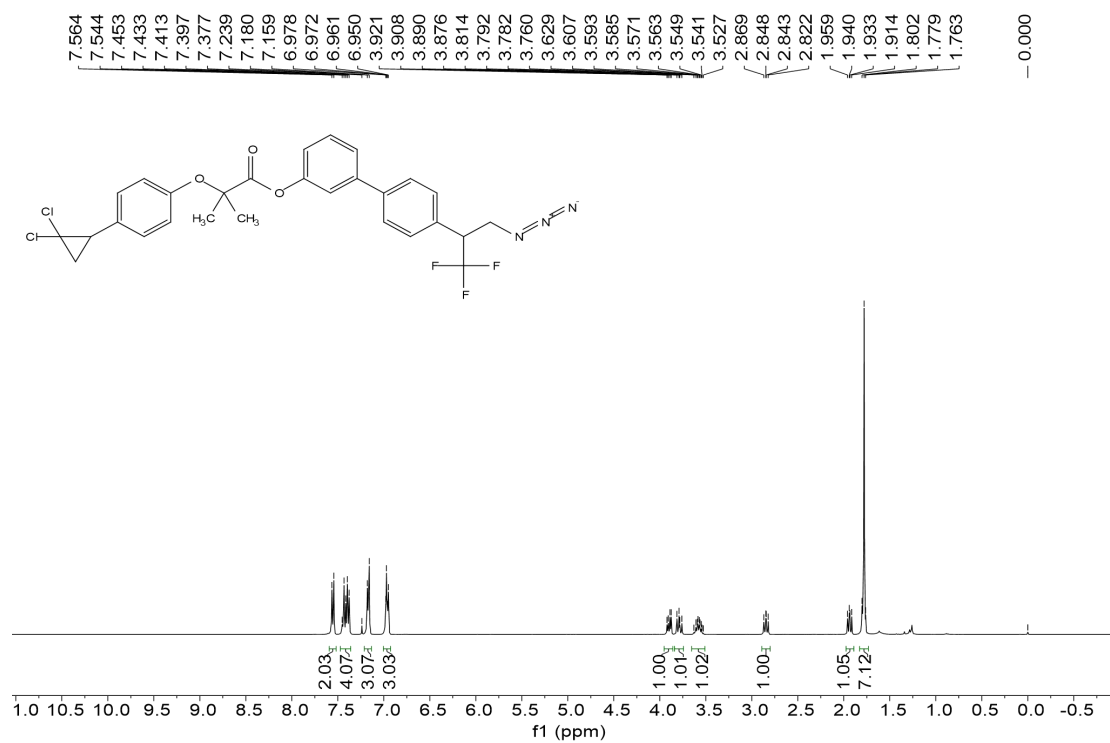

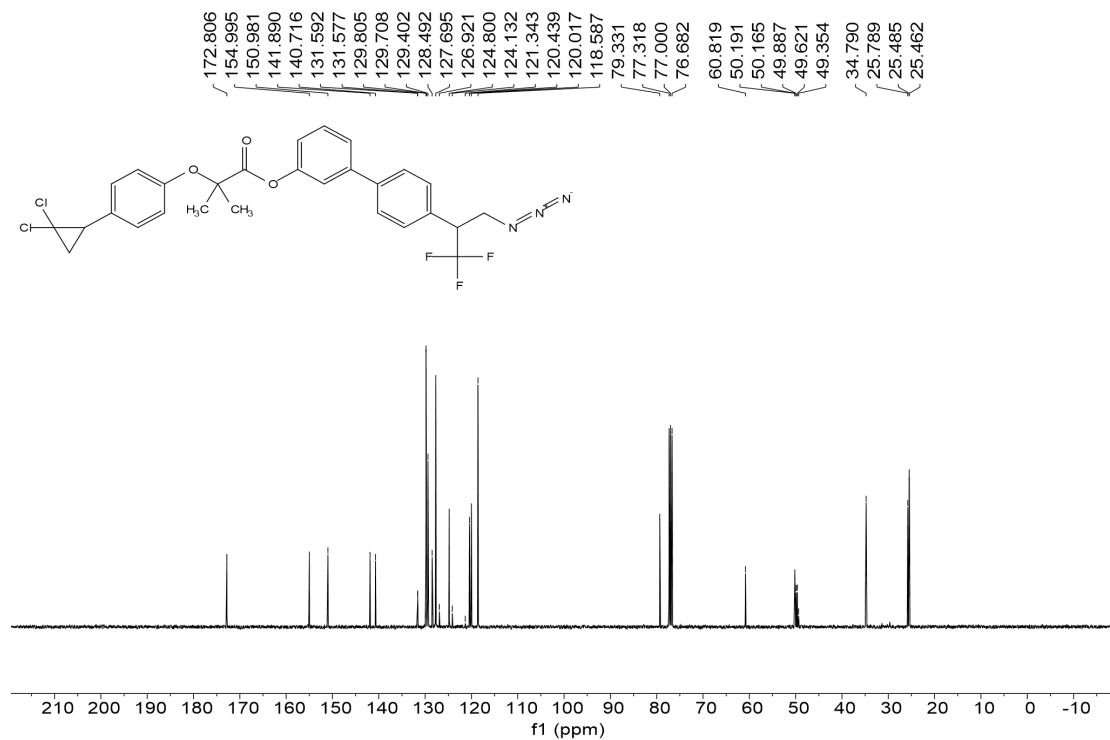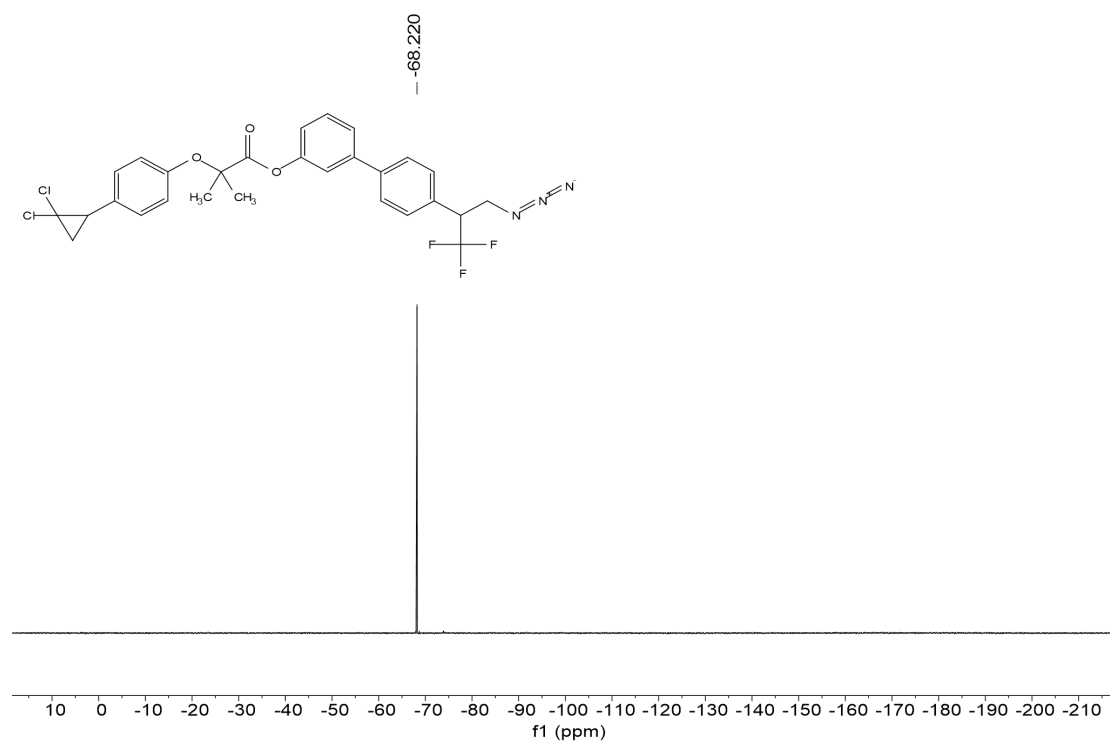

$^1\text{H}$  (400 MHz,  $\text{CDCl}_3$ ),  $^{13}\text{C}$  (101 MHz,  $\text{CDCl}_3$ ) and  $^{19}\text{F}$  (376 MHz,  $\text{CDCl}_3$ ) NMR spectrum of compound **29**

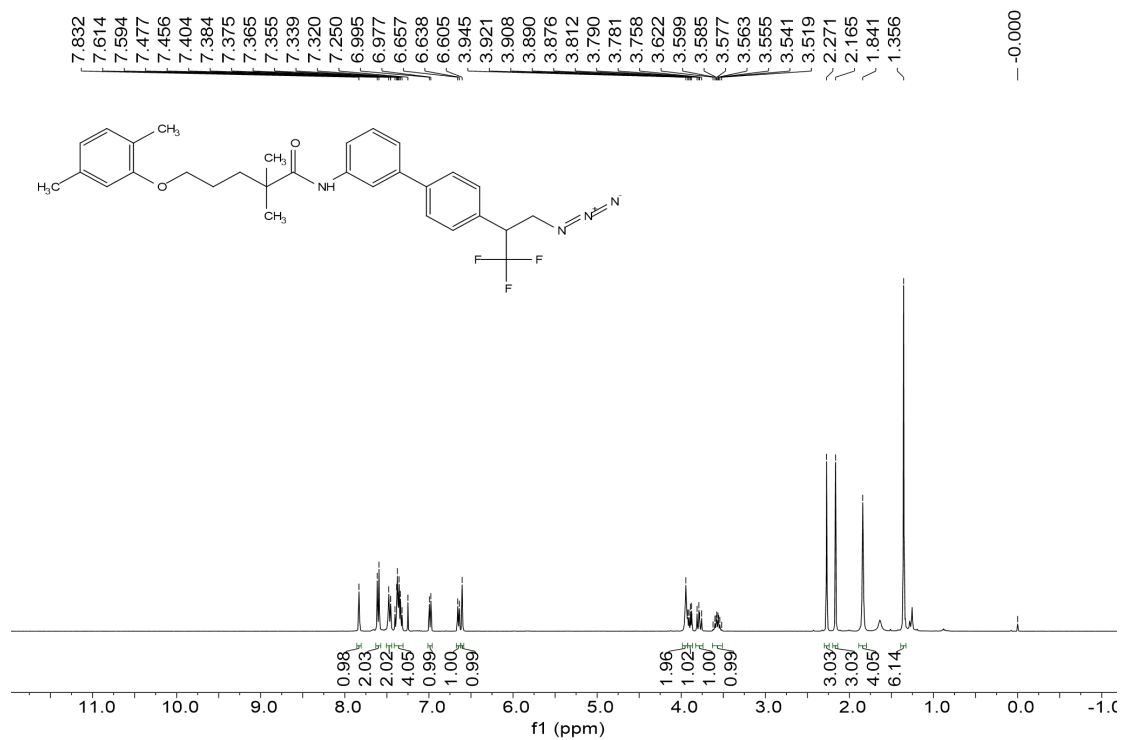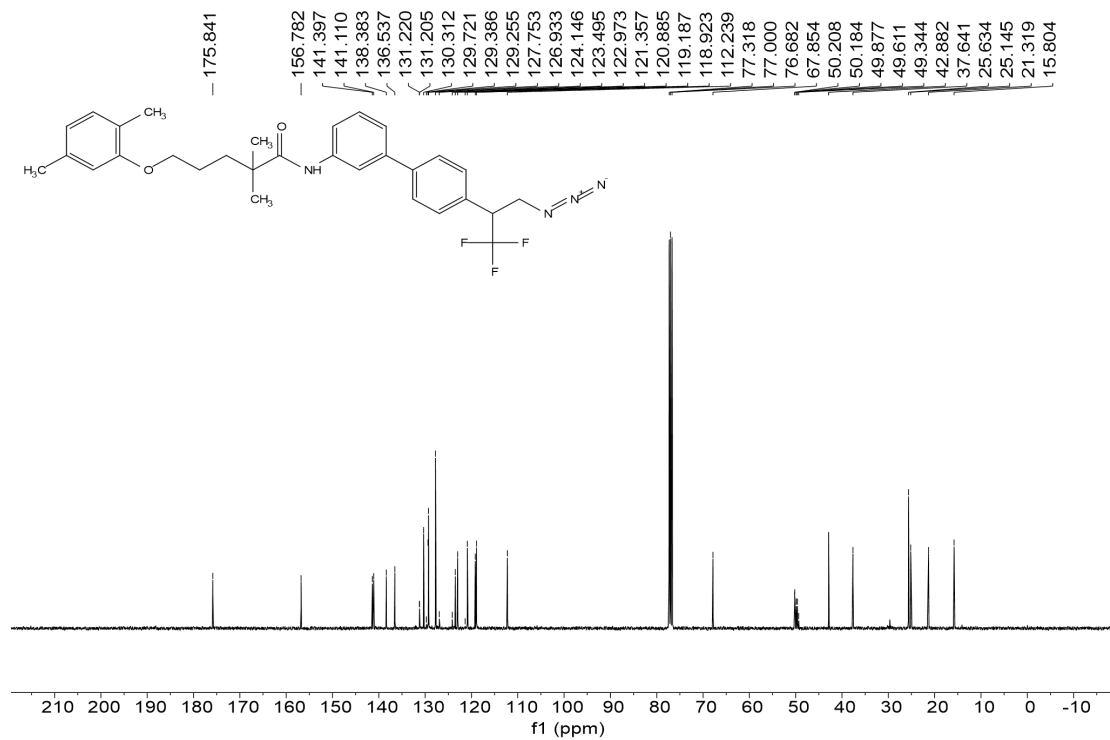

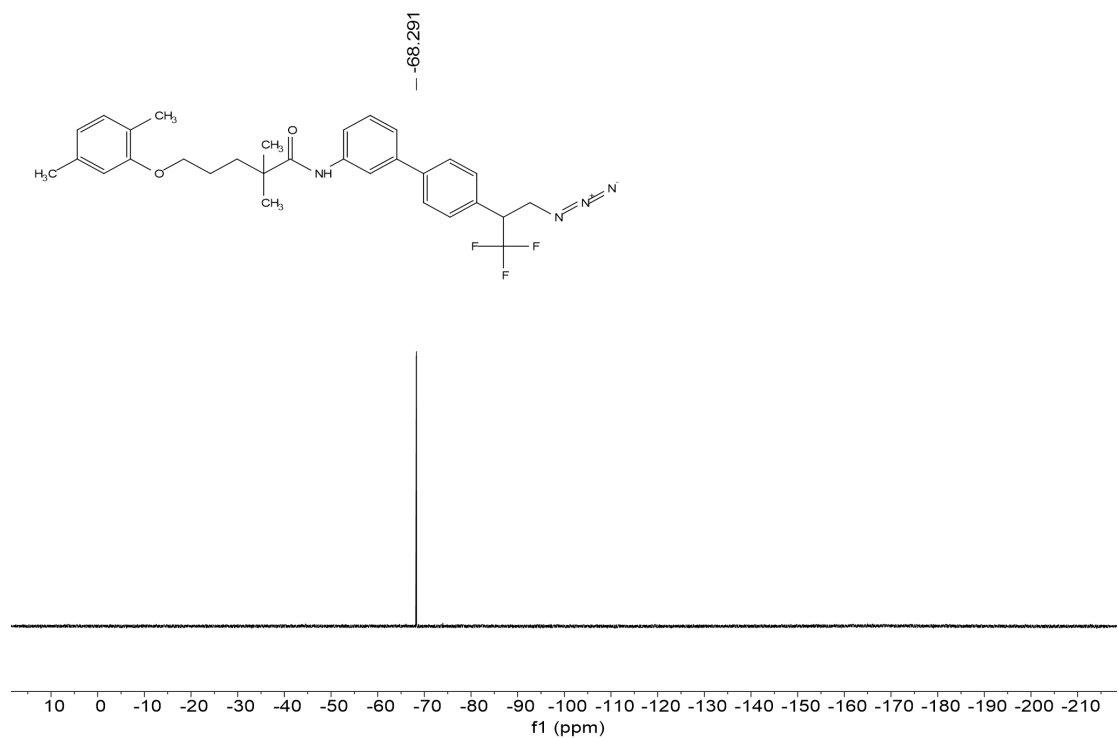

$^1\text{H}$  (400 MHz,  $\text{CDCl}_3$ ),  $^{13}\text{C}$  (101 MHz,  $\text{CDCl}_3$ ) and  $^{19}\text{F}$  (376 MHz,  $\text{CDCl}_3$ ) NMR spectrum of compound **30**

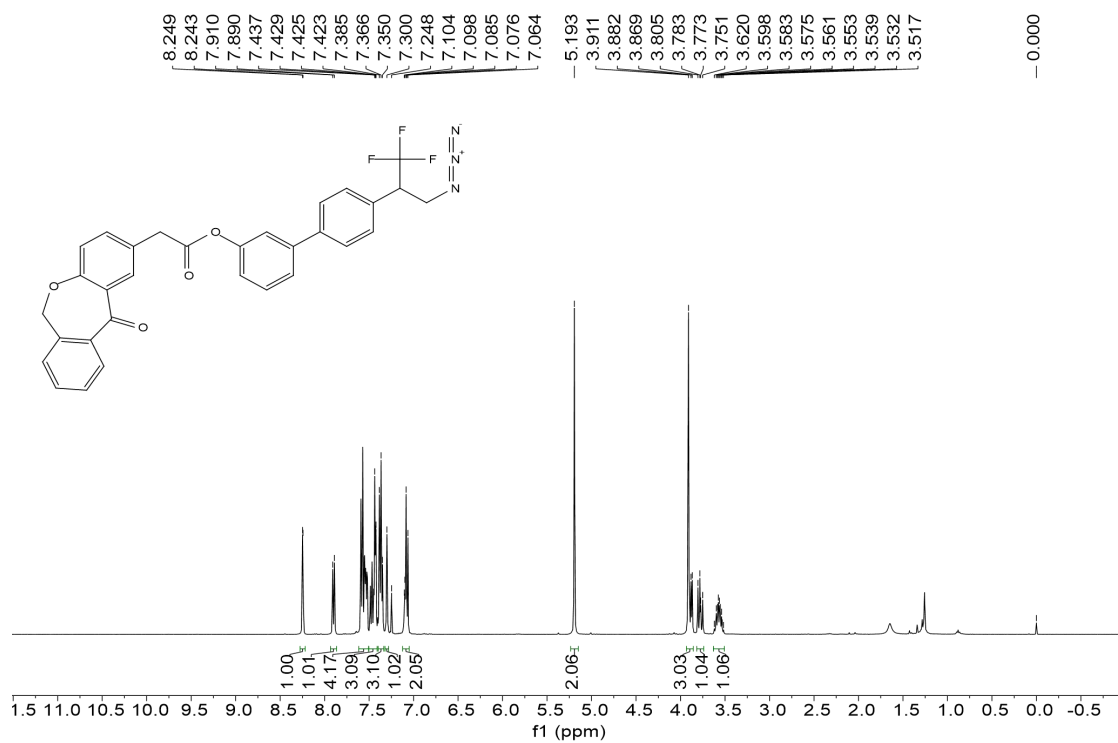

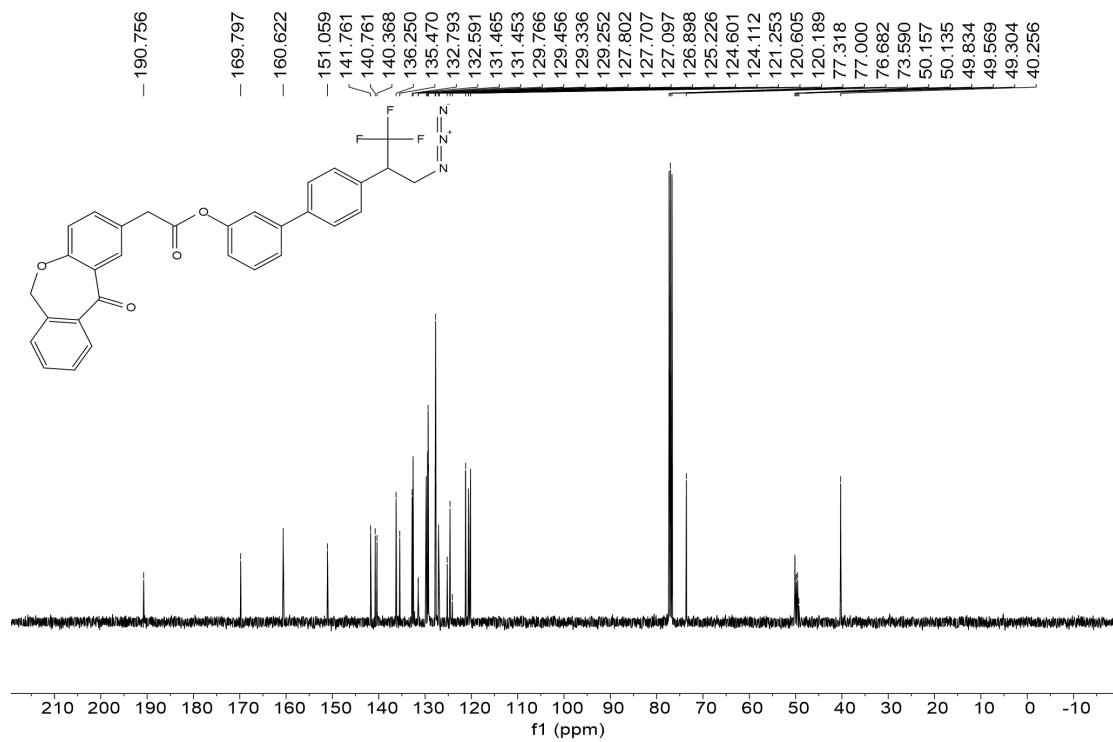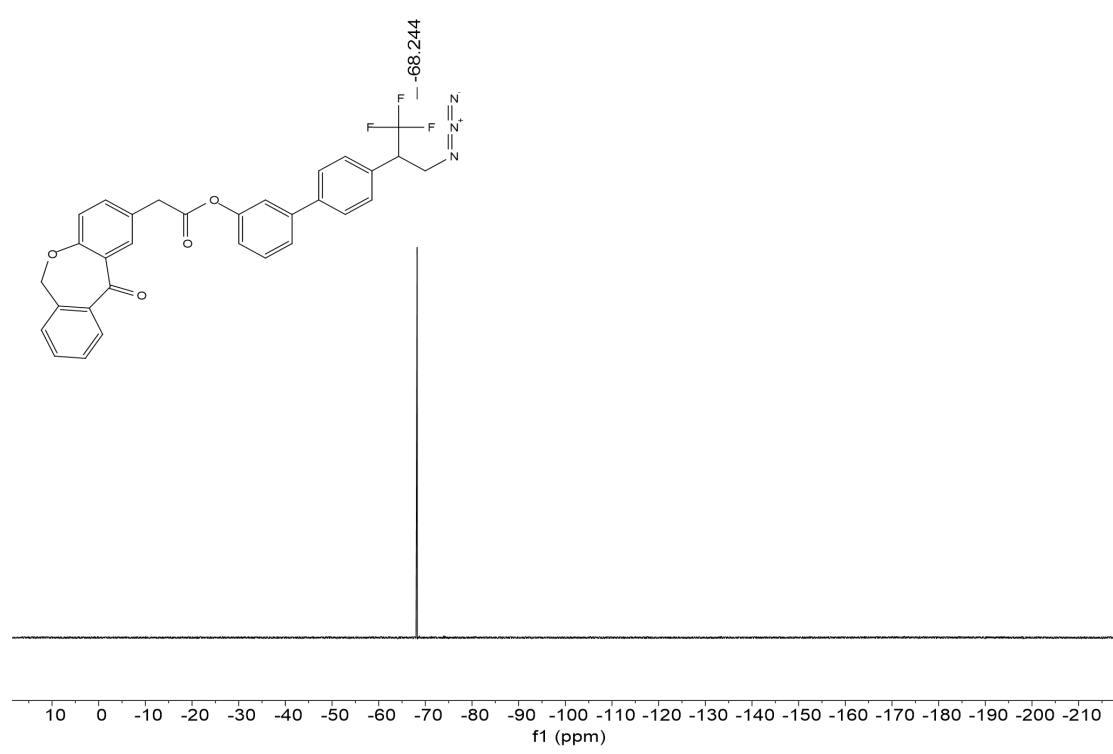



<sup>1</sup>H (400 MHz, CDCl<sub>3</sub>), <sup>13</sup>C (101 MHz, CDCl<sub>3</sub>) and <sup>19</sup>F (376 MHz, CDCl<sub>3</sub>) NMR spectrum of  
compound **31**

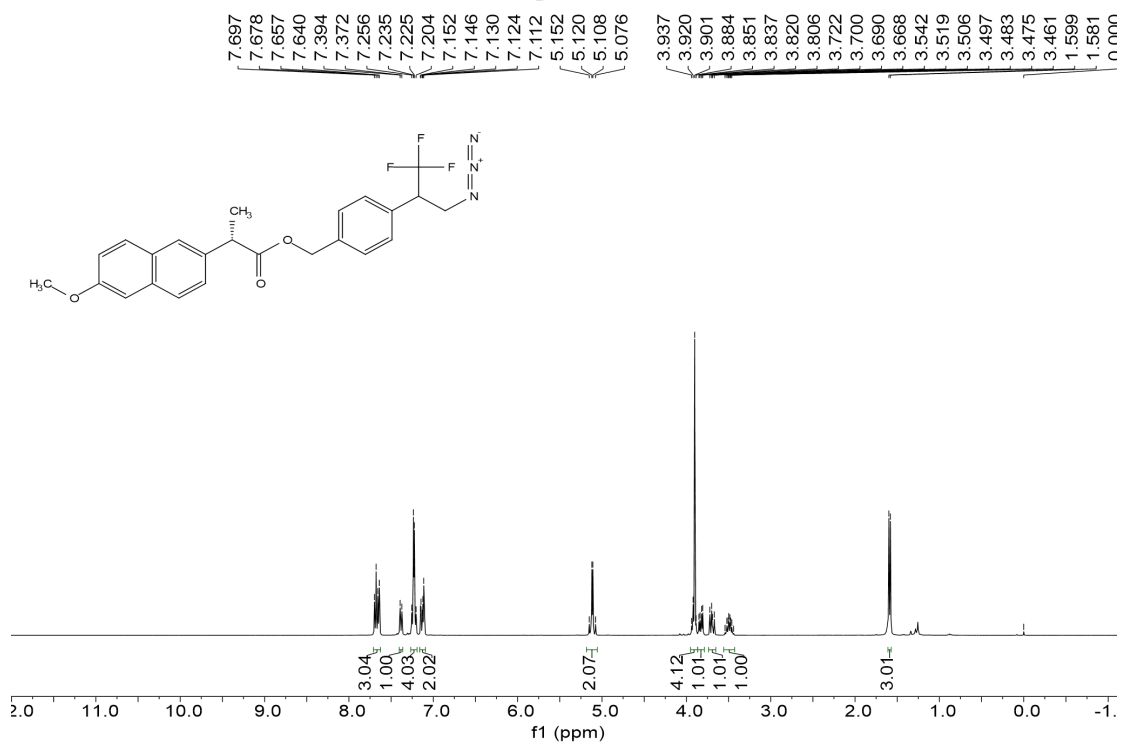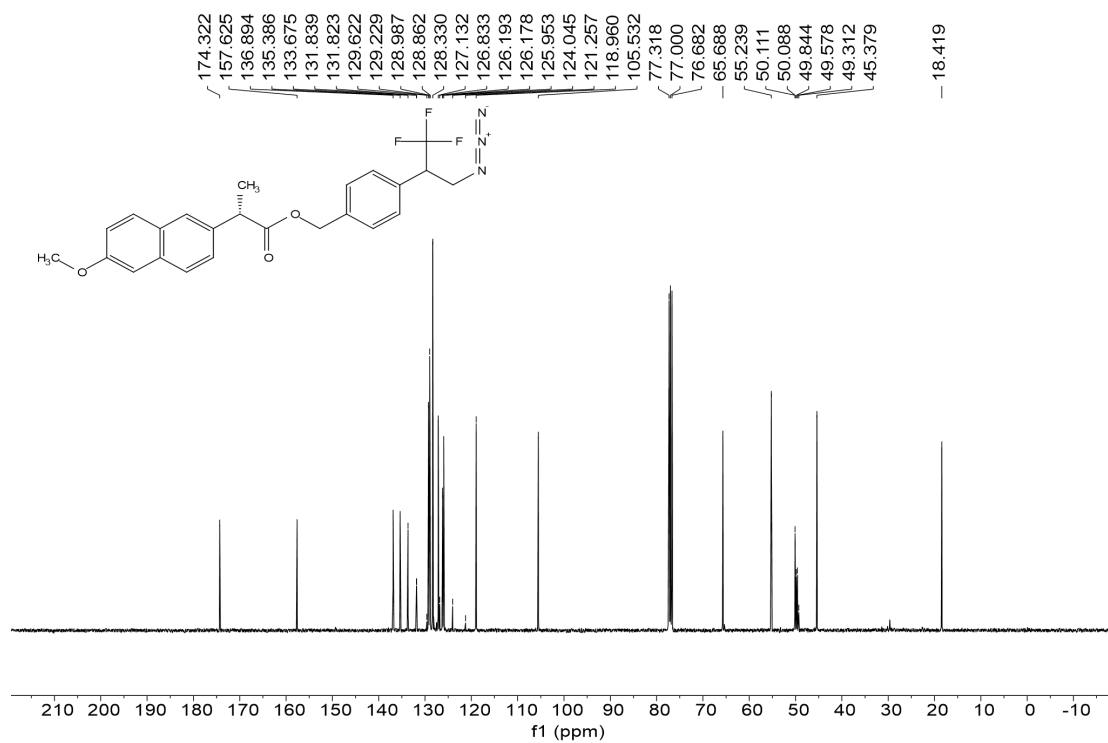

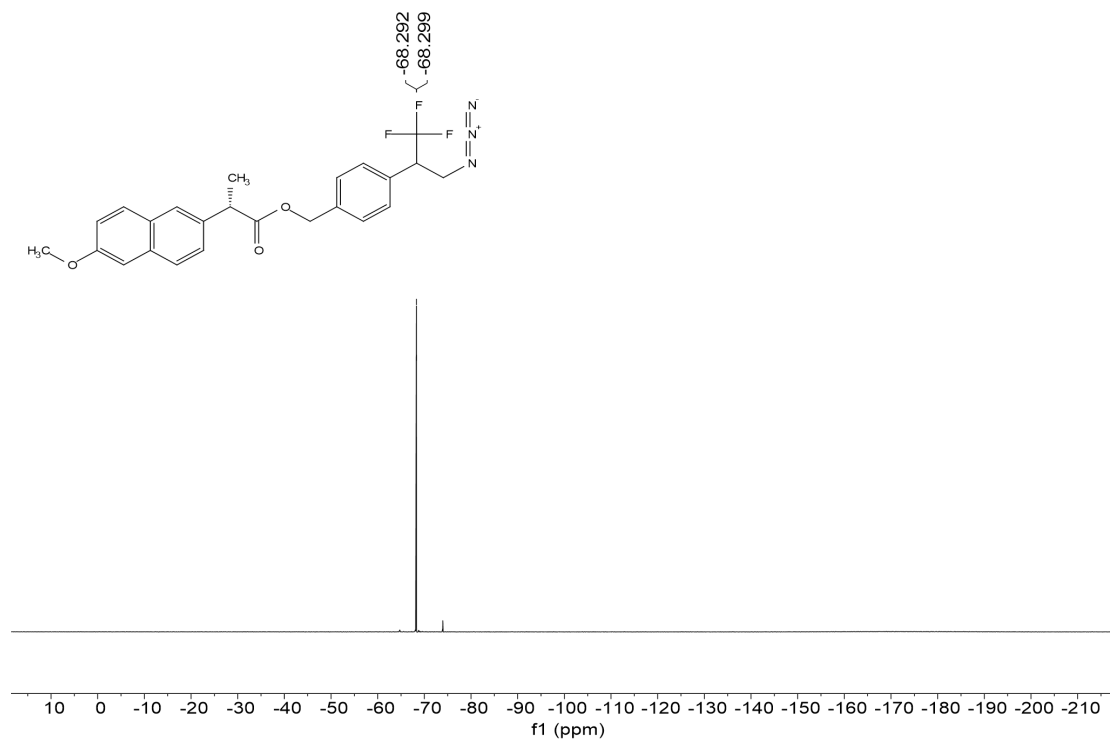

$^1\text{H}$  (400 MHz,  $\text{CDCl}_3$ ),  $^{13}\text{C}$  (101 MHz,  $\text{CDCl}_3$ ) and  $^{19}\text{F}$  (376 MHz,  $\text{CDCl}_3$ ) NMR spectrum of compound 32

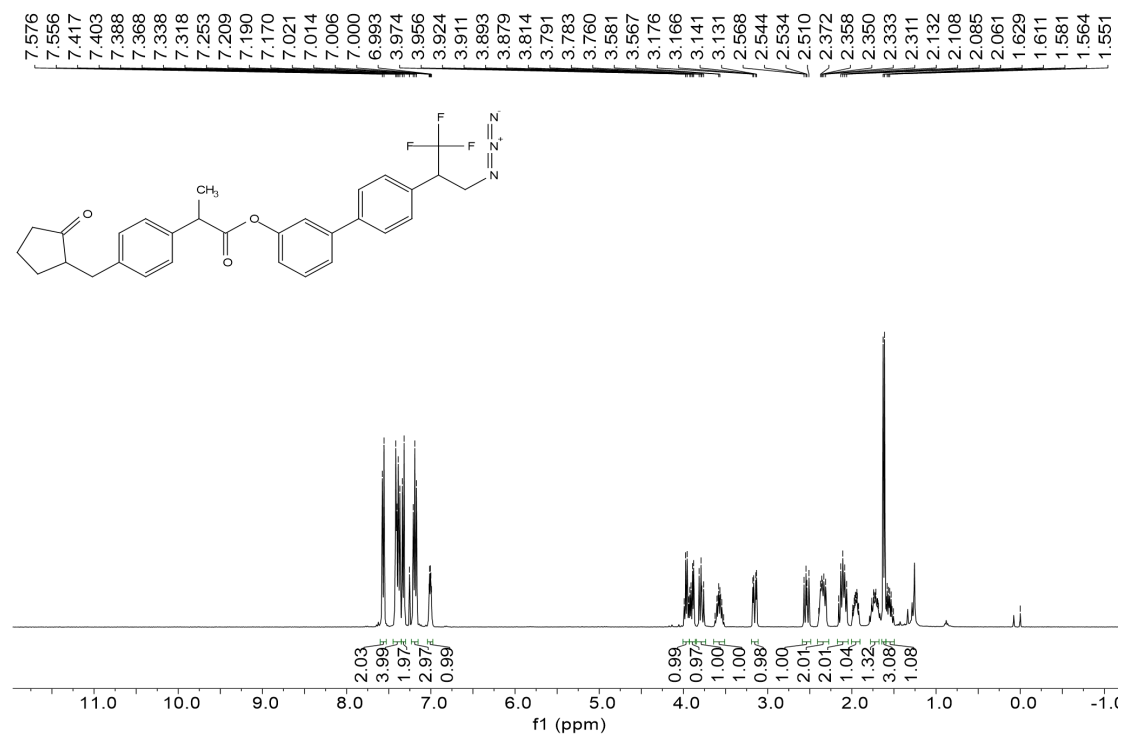

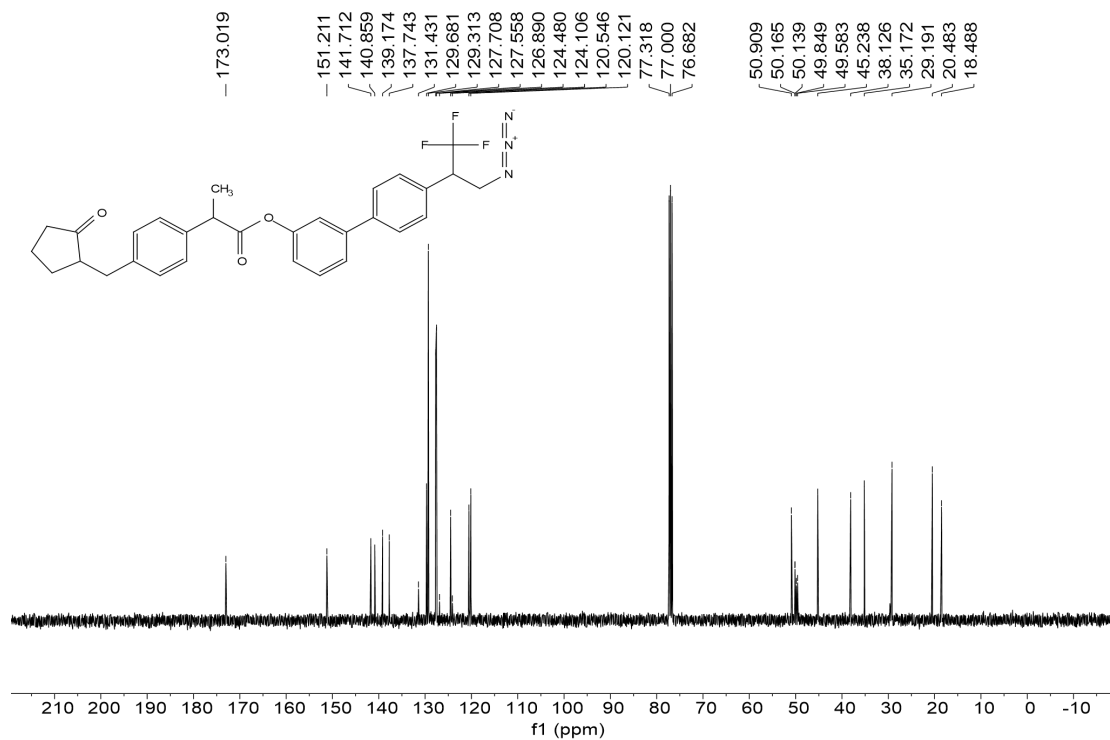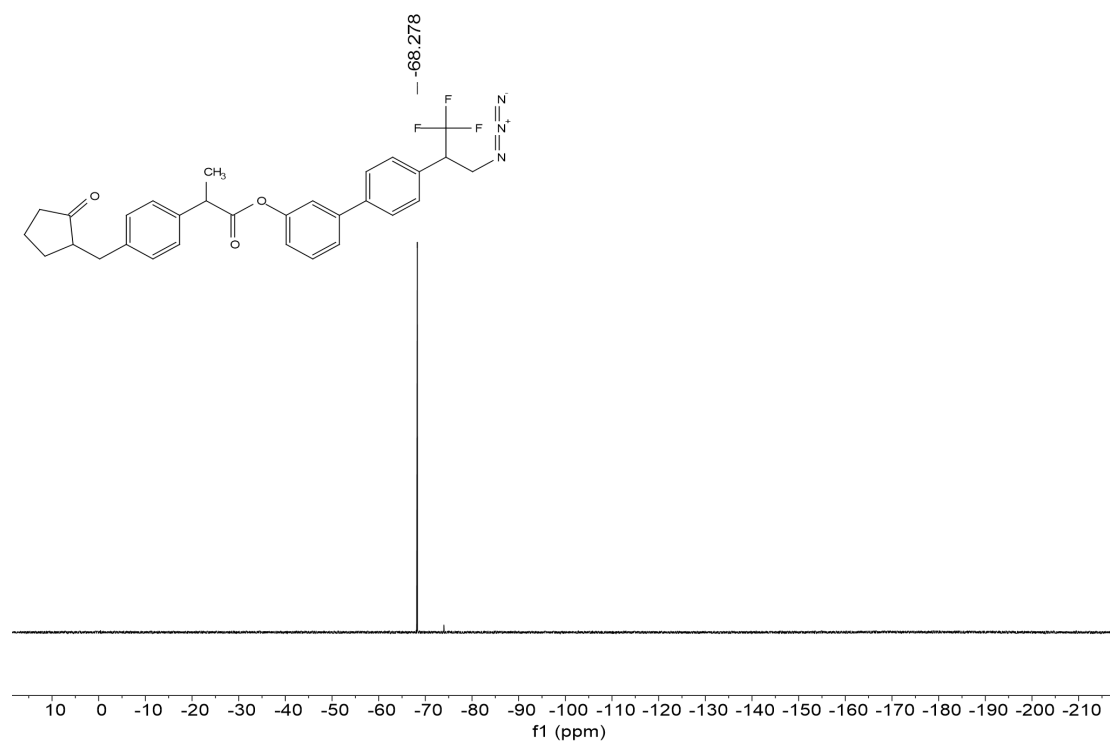

$^1\text{H}$  (400 MHz,  $\text{CDCl}_3$ ),  $^{13}\text{C}$  (101 MHz,  $\text{CDCl}_3$ ),  $^{19}\text{F}$  (376 MHz,  $\text{CDCl}_3$ ) and  $^{31}\text{P}$  (162 MHz,  $\text{CDCl}_3$ )

spectrum of compound **33**

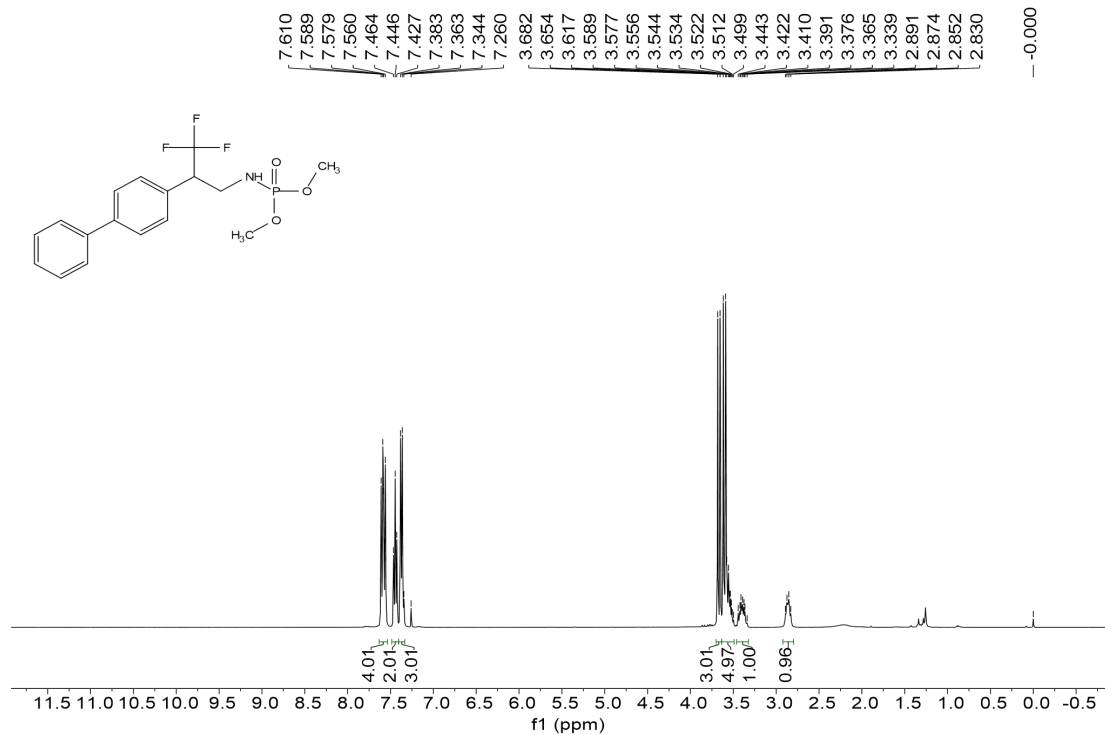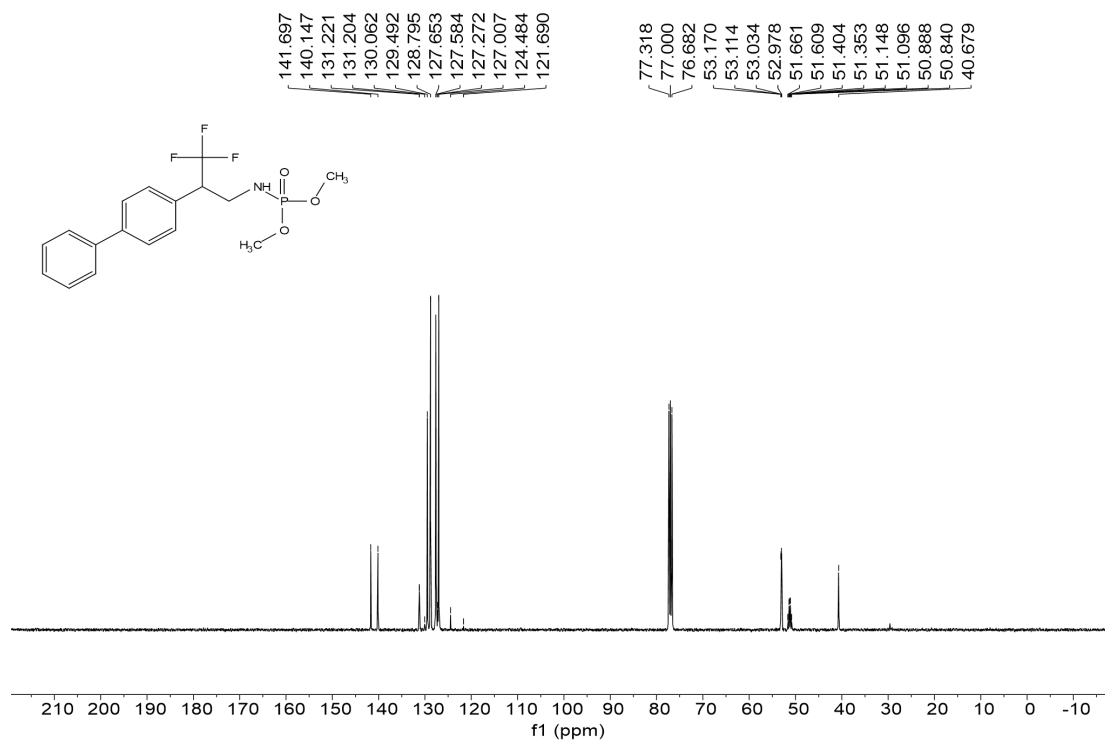

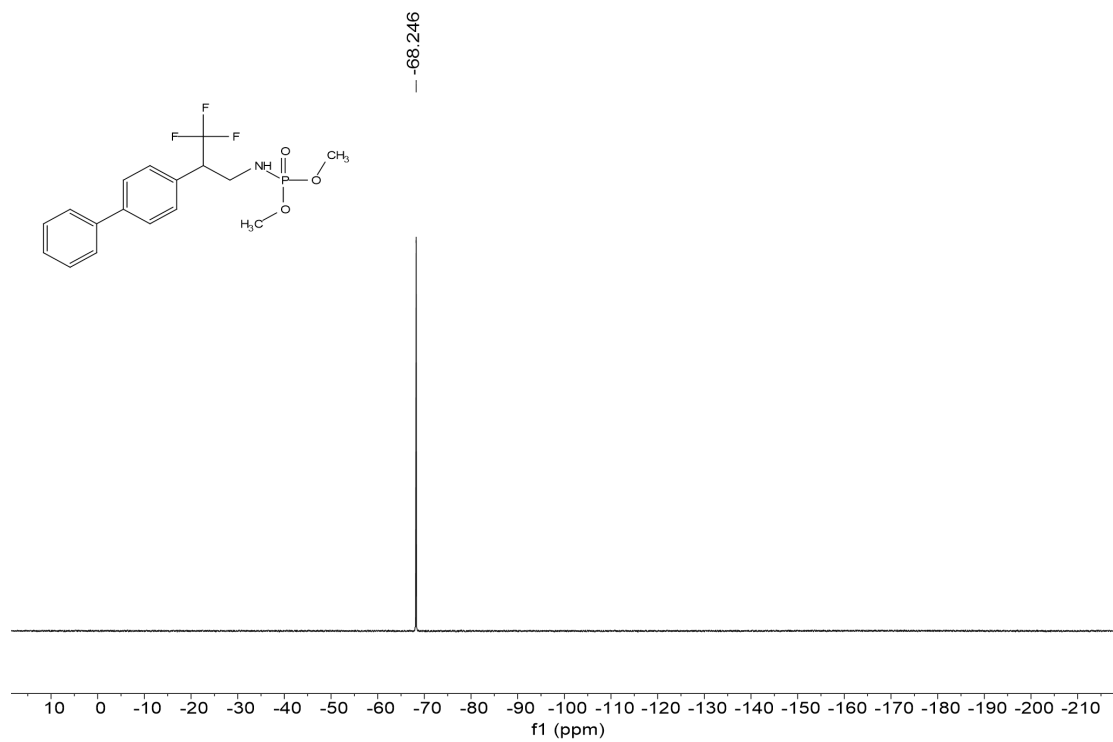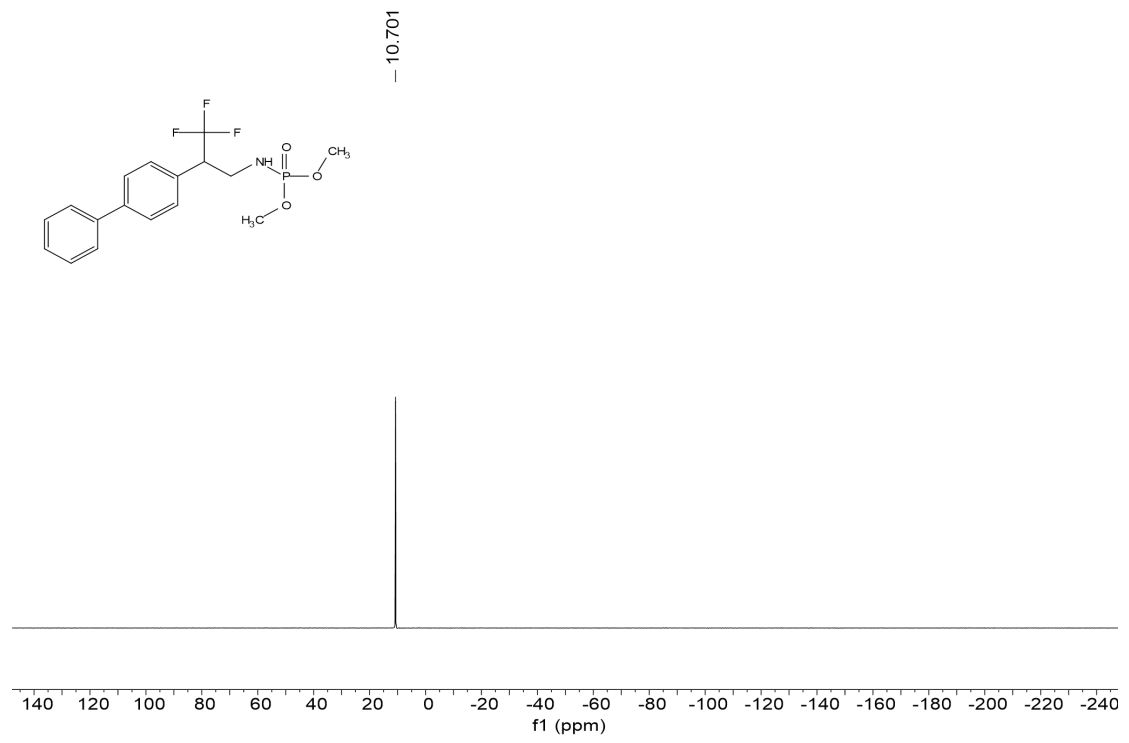

$^1\text{H}$  (400 MHz,  $\text{CDCl}_3$ ),  $^{13}\text{C}$  (101 MHz,  $\text{CDCl}_3$ ) and  $^{19}\text{F}$  (376 MHz,  $\text{CDCl}_3$ ) NMR spectrum of compound **34**

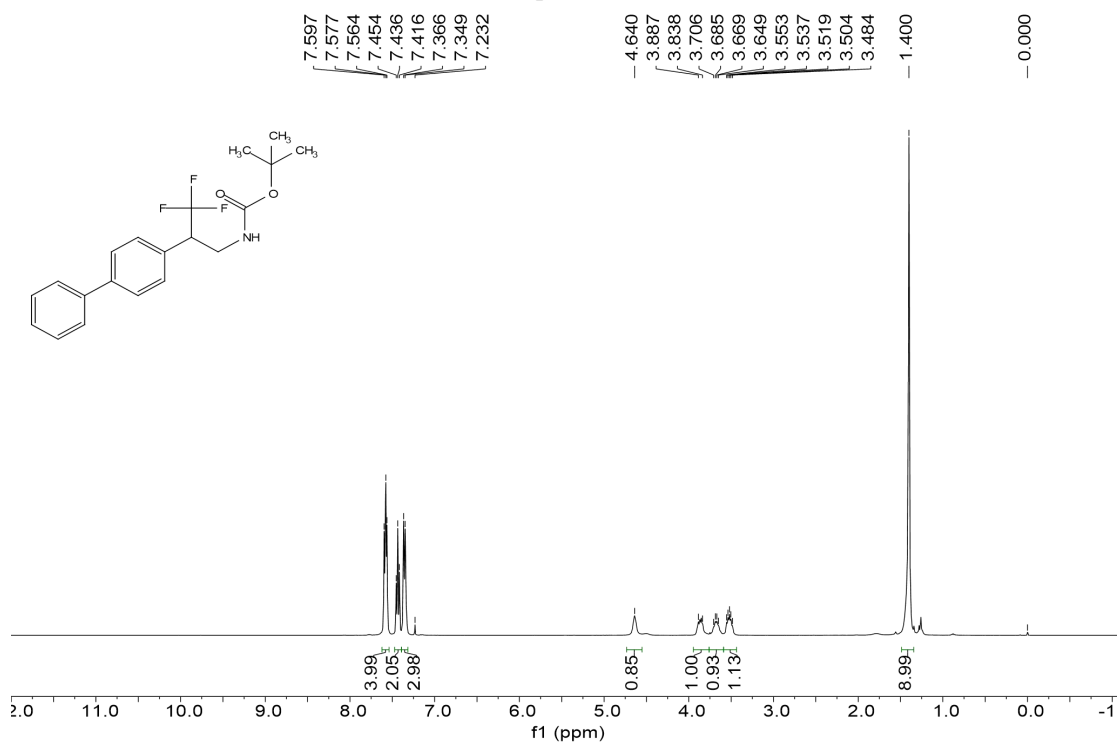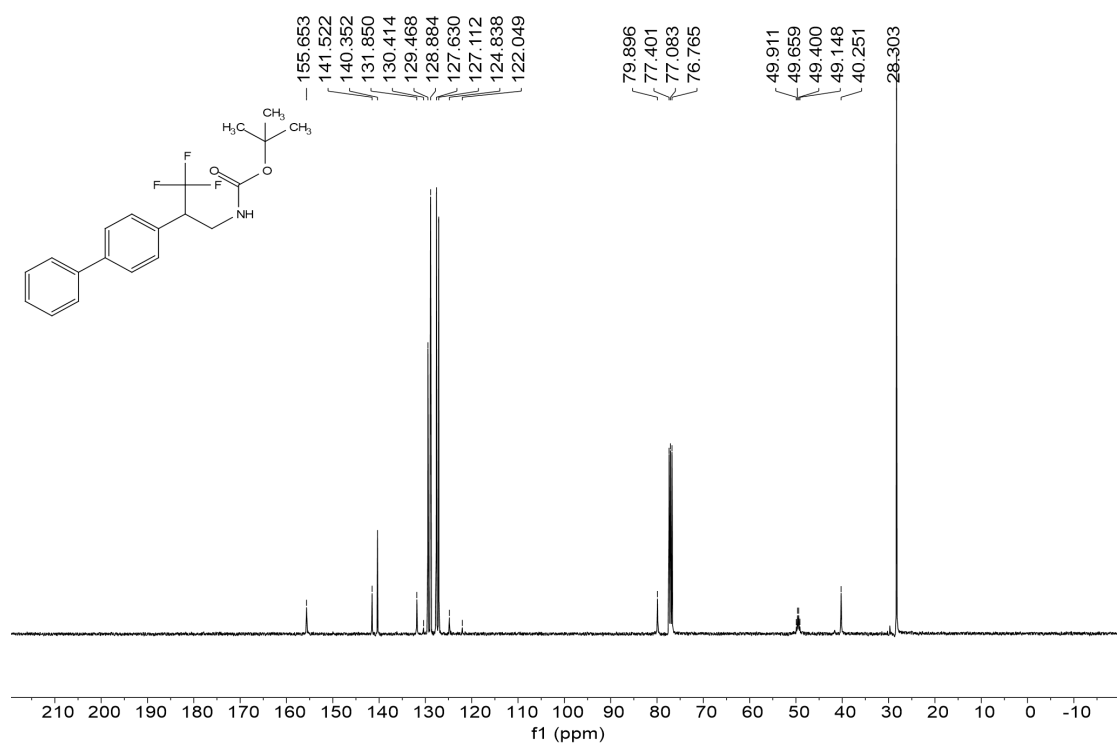

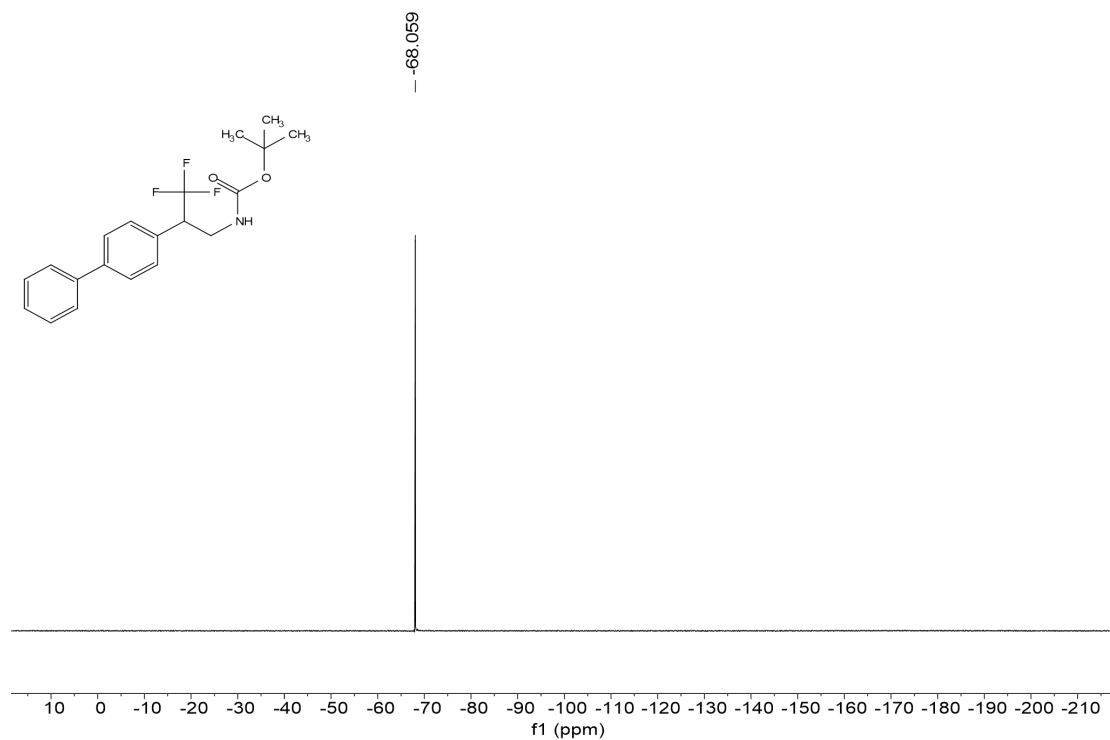

$^1\text{H}$  (400 MHz,  $\text{CDCl}_3$ ),  $^{13}\text{C}$  (101 MHz,  $\text{CDCl}_3$ ) and  $^{19}\text{F}$  (376 MHz,  $\text{CDCl}_3$ ) NMR spectrum of compound **35**

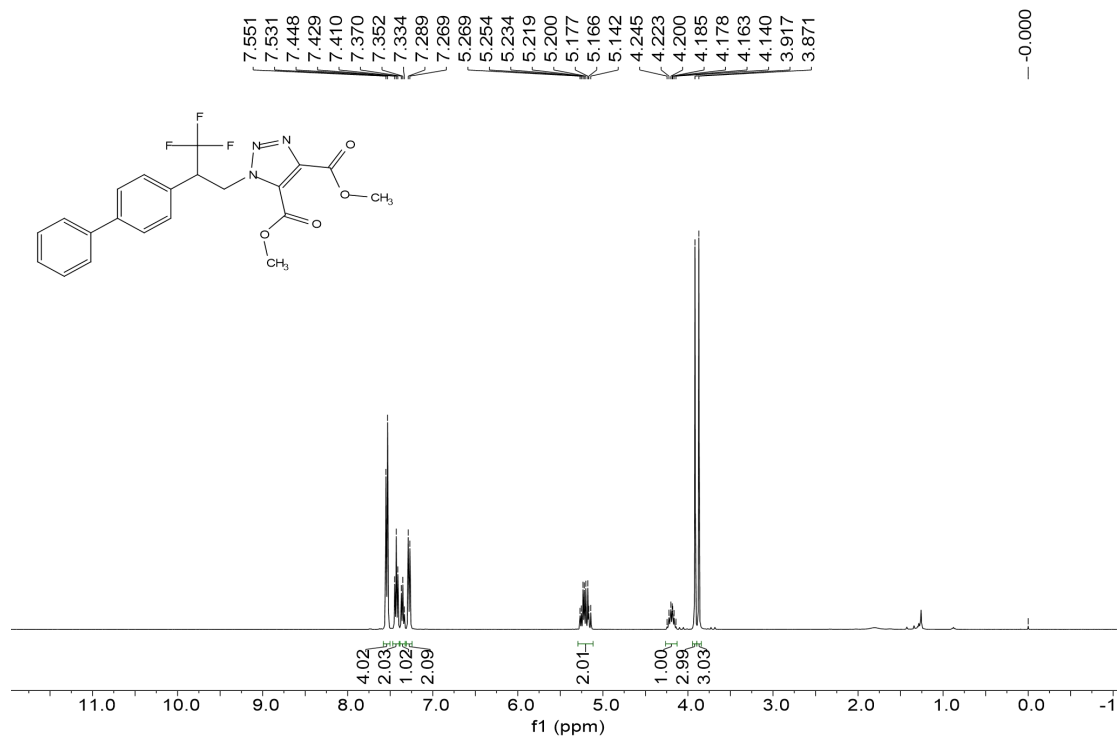

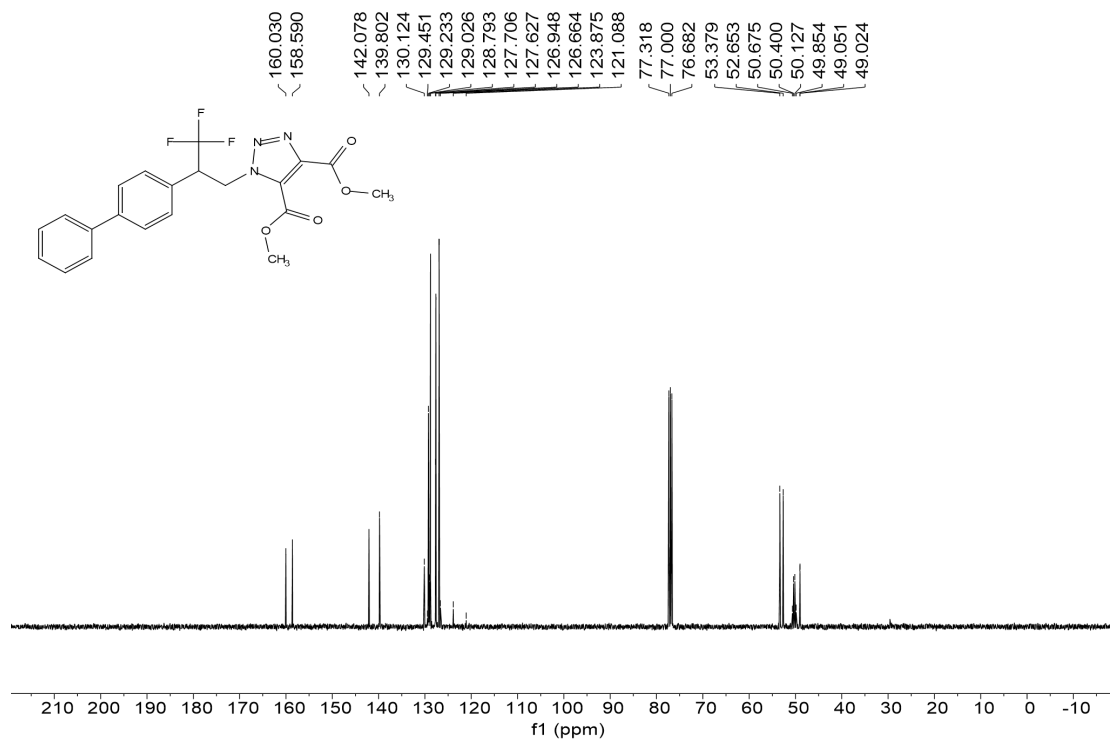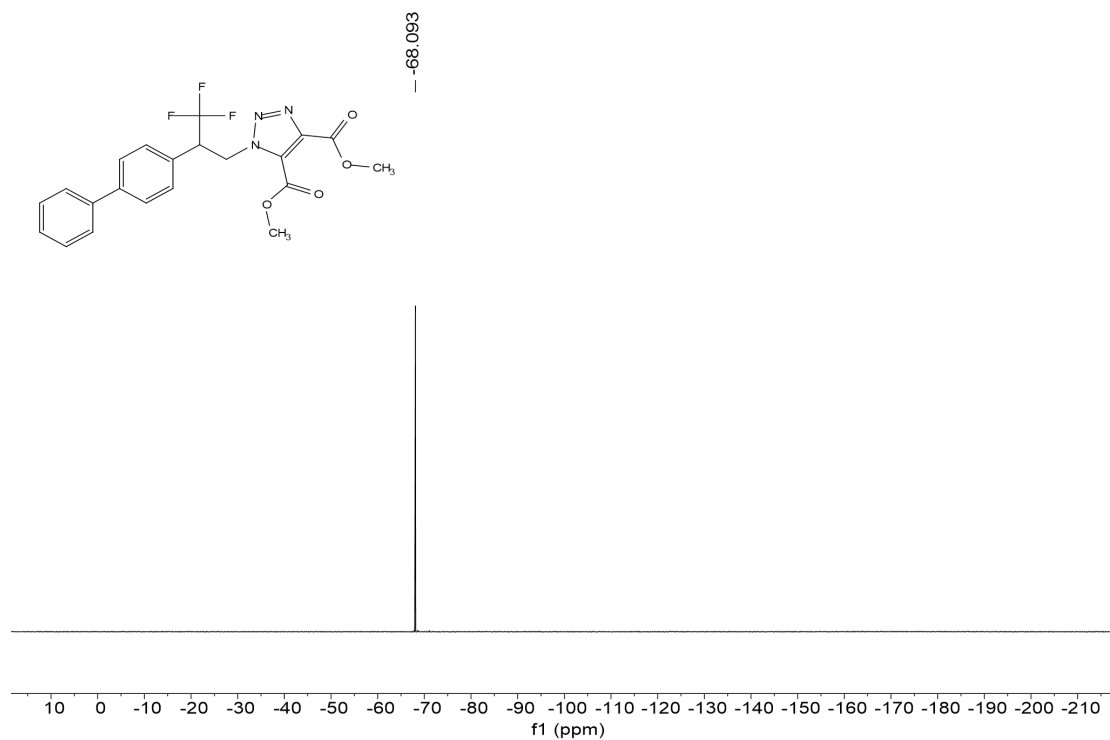



$^1\text{H}$  (400 MHz,  $\text{CDCl}_3$ ),  $^{13}\text{C}$  (101 MHz,  $\text{CDCl}_3$ ) and  $^{19}\text{F}$  (376 MHz,  $\text{CDCl}_3$ ) NMR spectrum of compound **36**

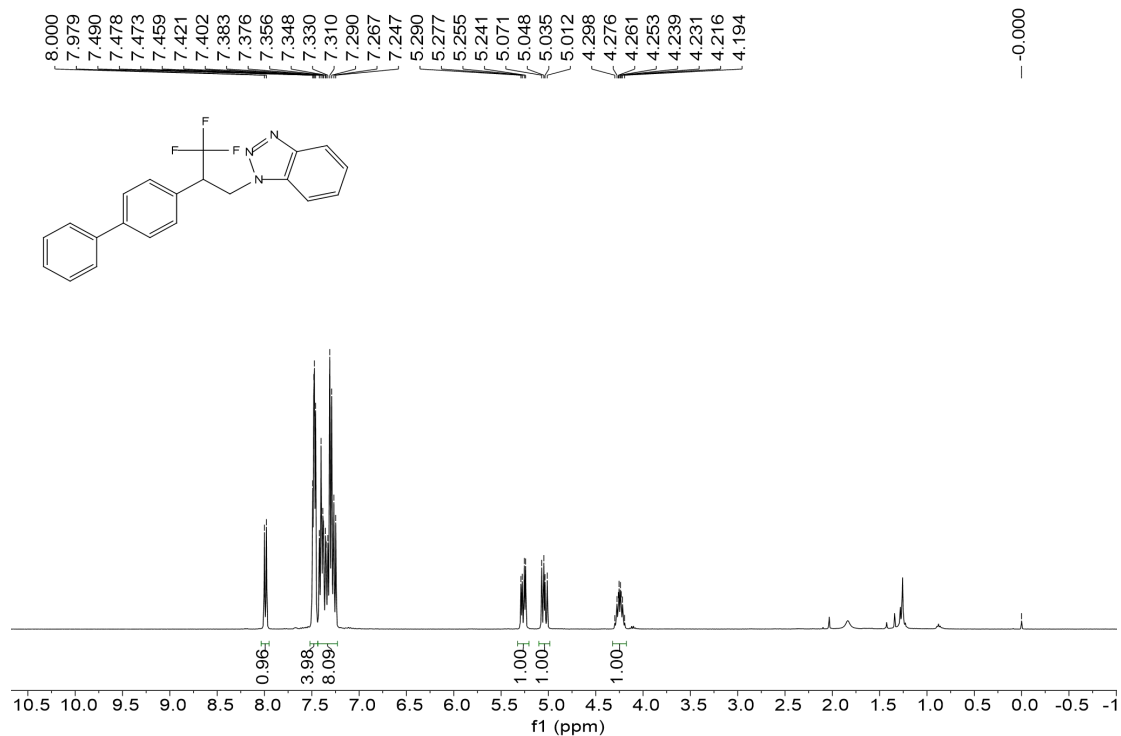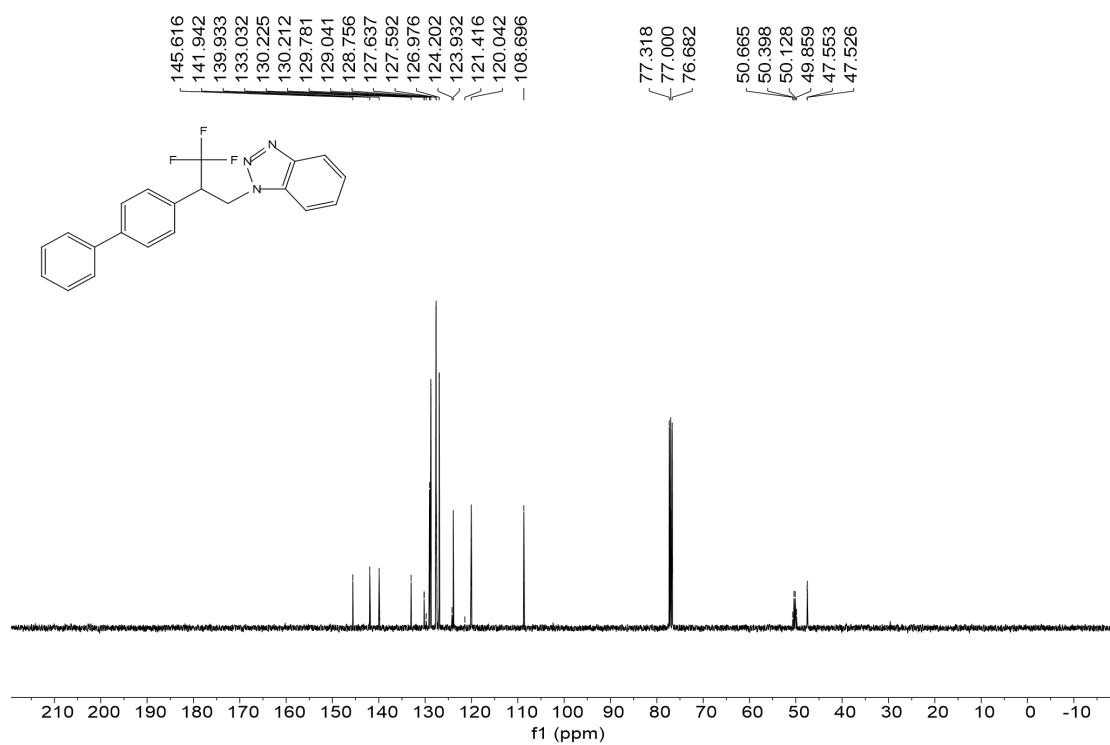

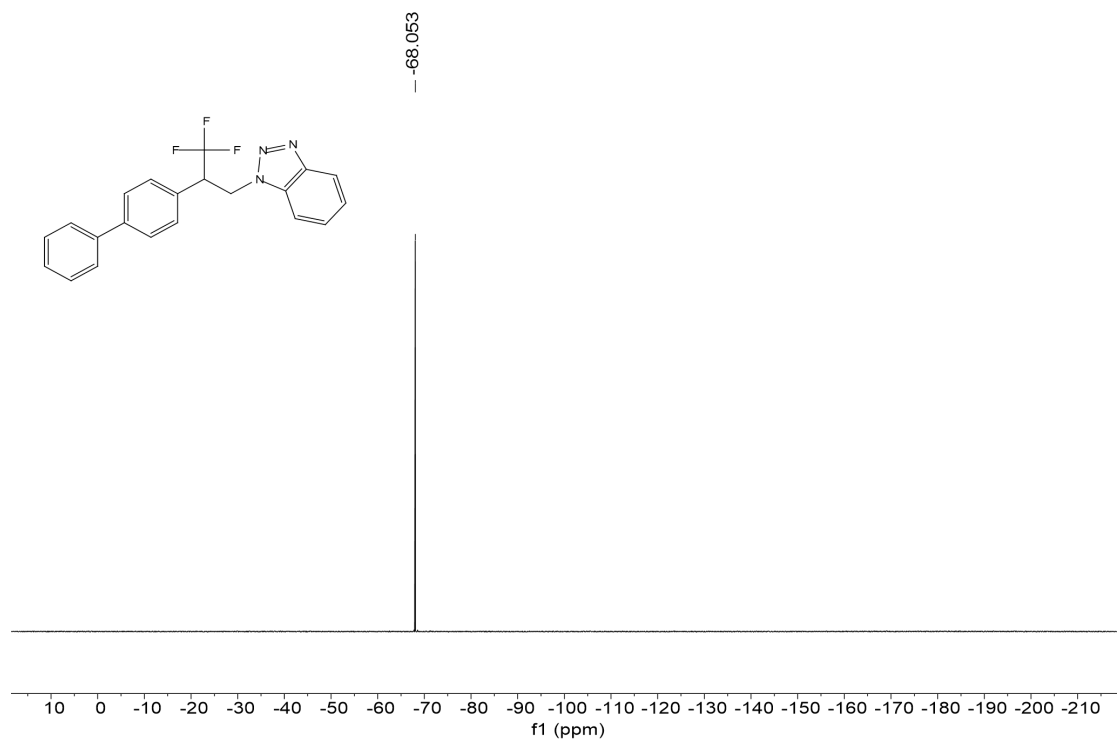

$^1\text{H}$  (400 MHz,  $\text{CDCl}_3$ ),  $^{13}\text{C}$  (101 MHz,  $\text{CDCl}_3$ ),  $^{19}\text{F}$  (376 MHz,  $\text{CDCl}_3$ ), HSQC (400 MHz, 101 MHz,  $\text{CDCl}_3$ ) and HMBC (400 MHz, 101 MHz,  $\text{CDCl}_3$ ) NMR spectrum of compound 37

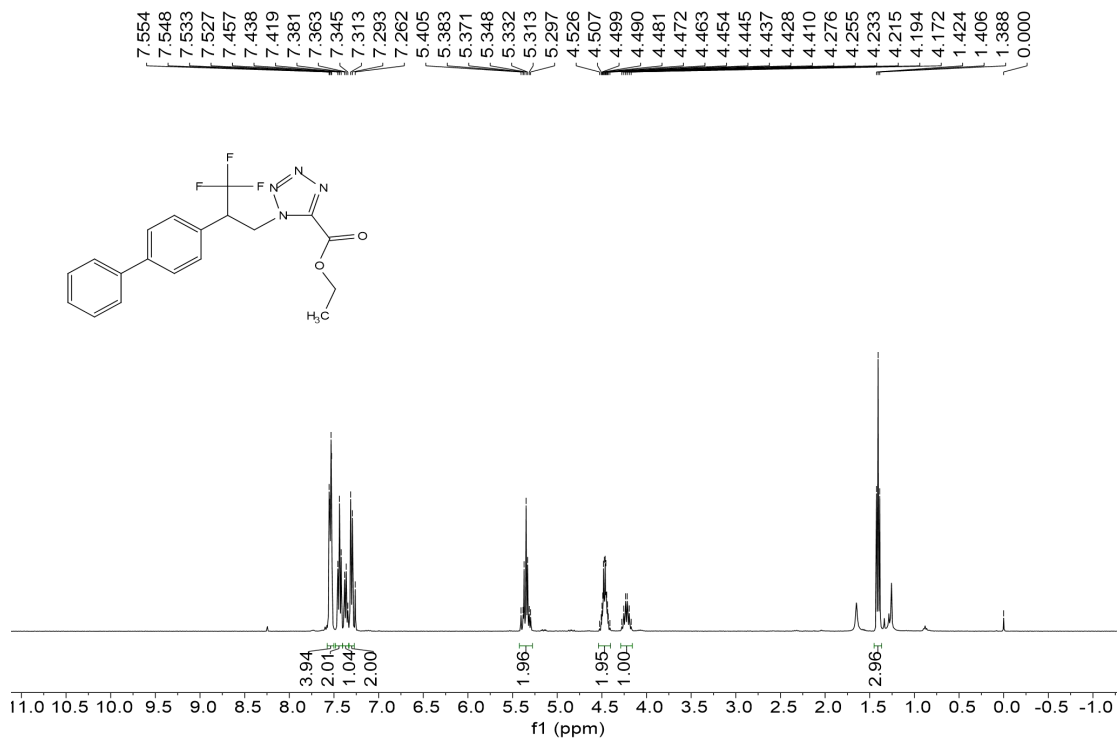

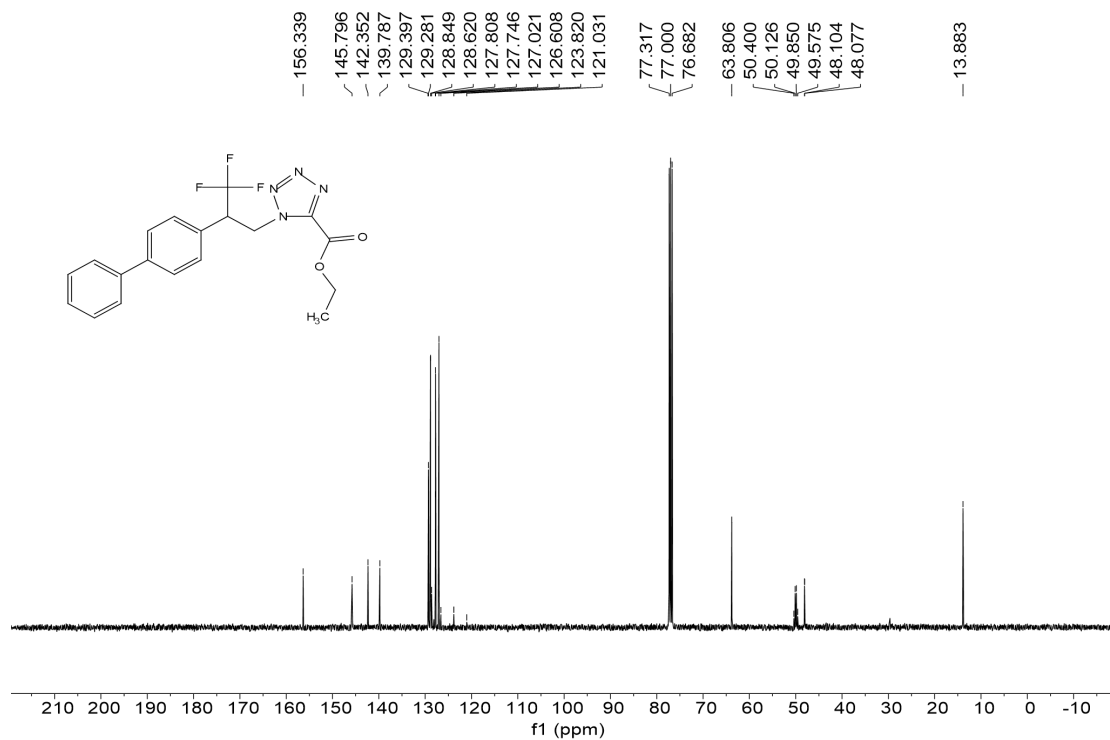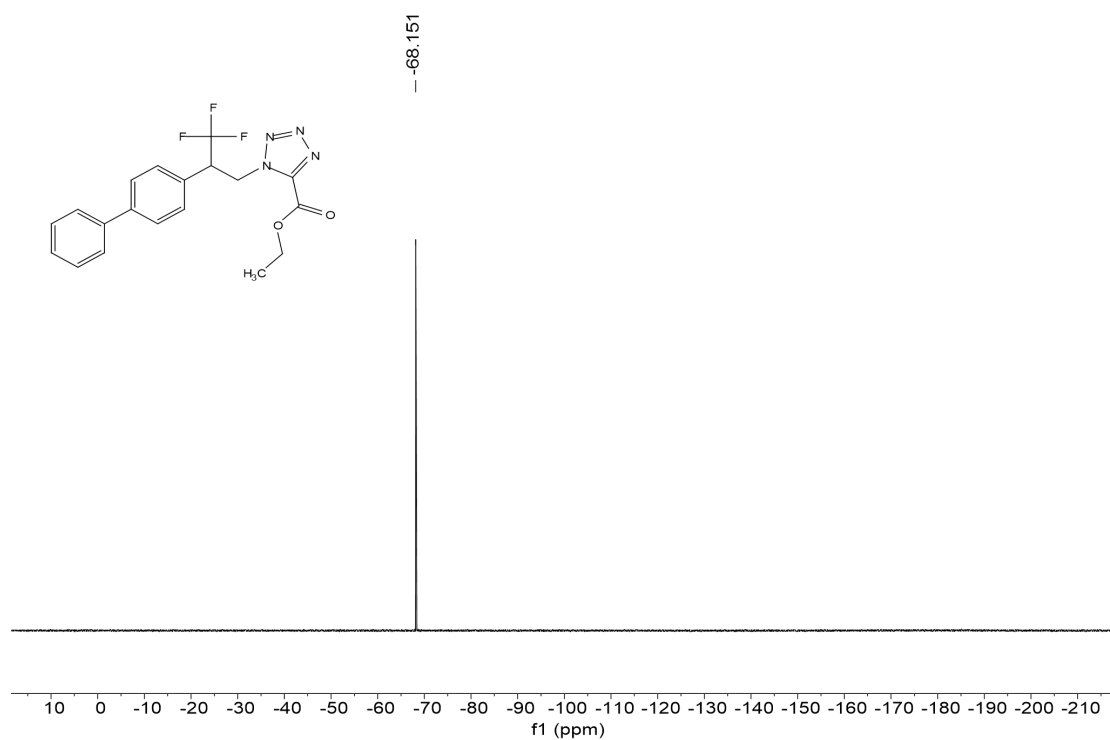

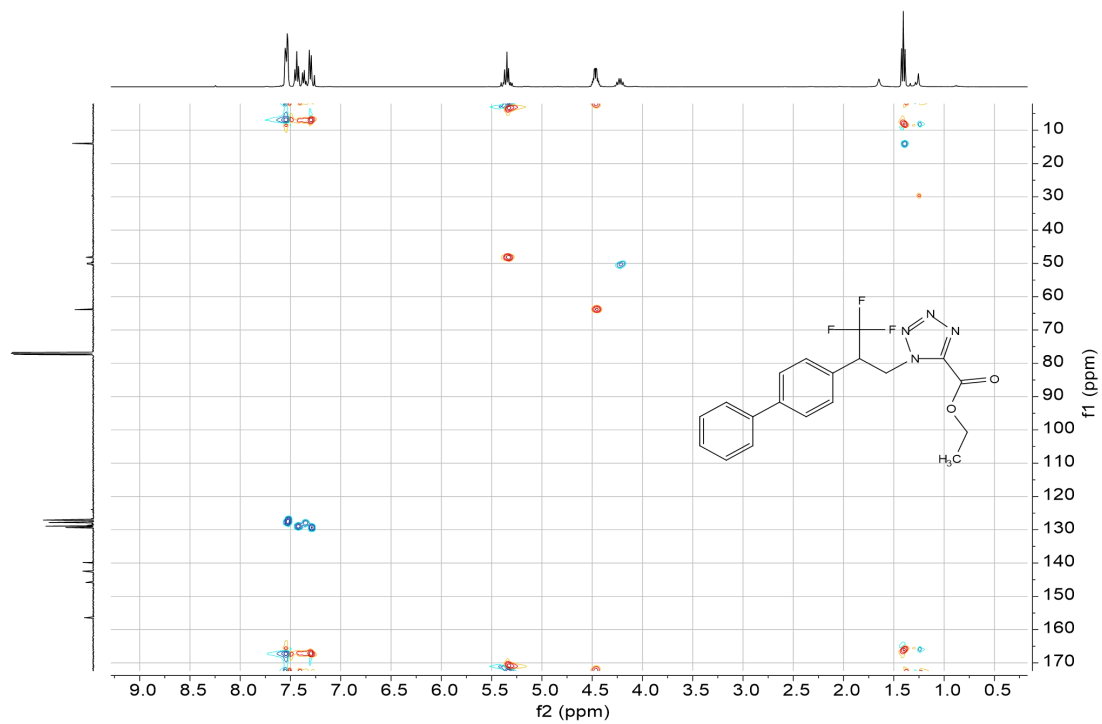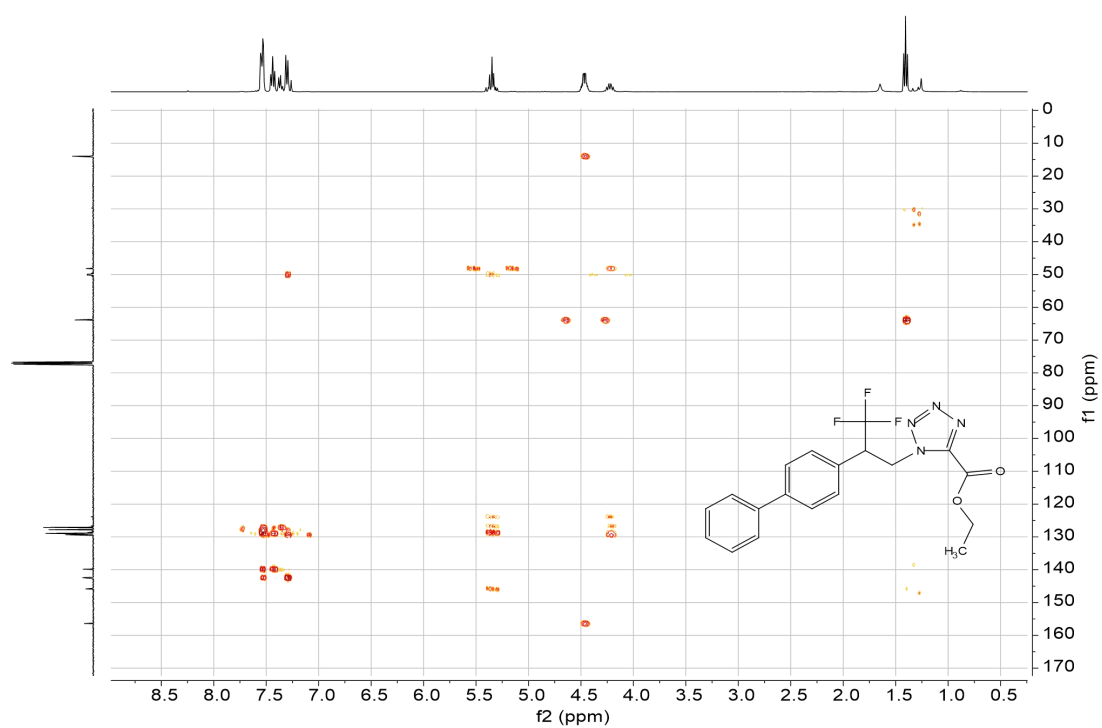

$^1\text{H}$  (400 MHz, DMSO),  $^{13}\text{C}$  (101 MHz, DMSO) and  $^{19}\text{F}$  (376 MHz, DMSO) NMR spectrum of compound **38**

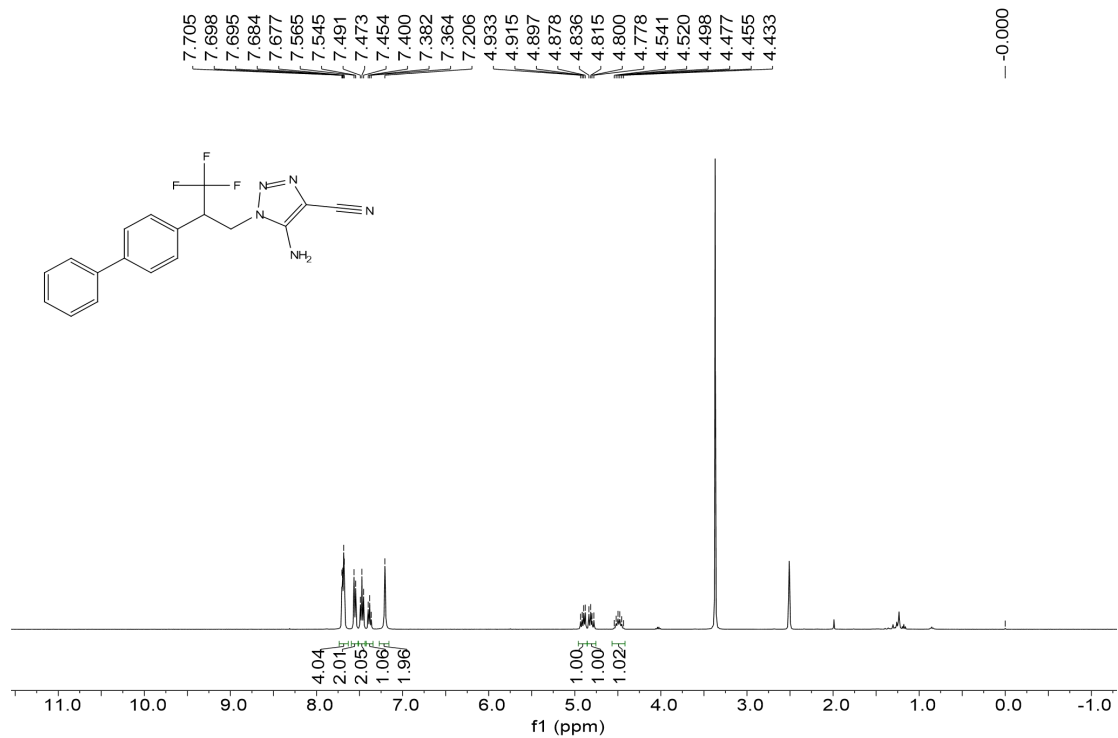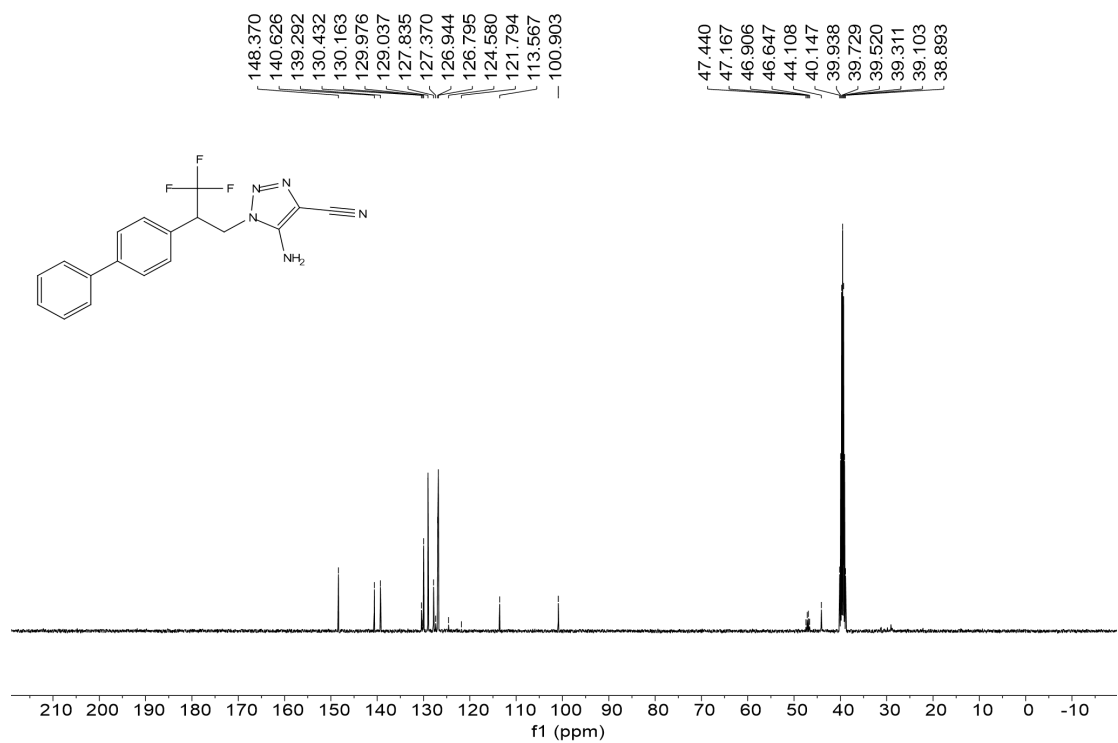

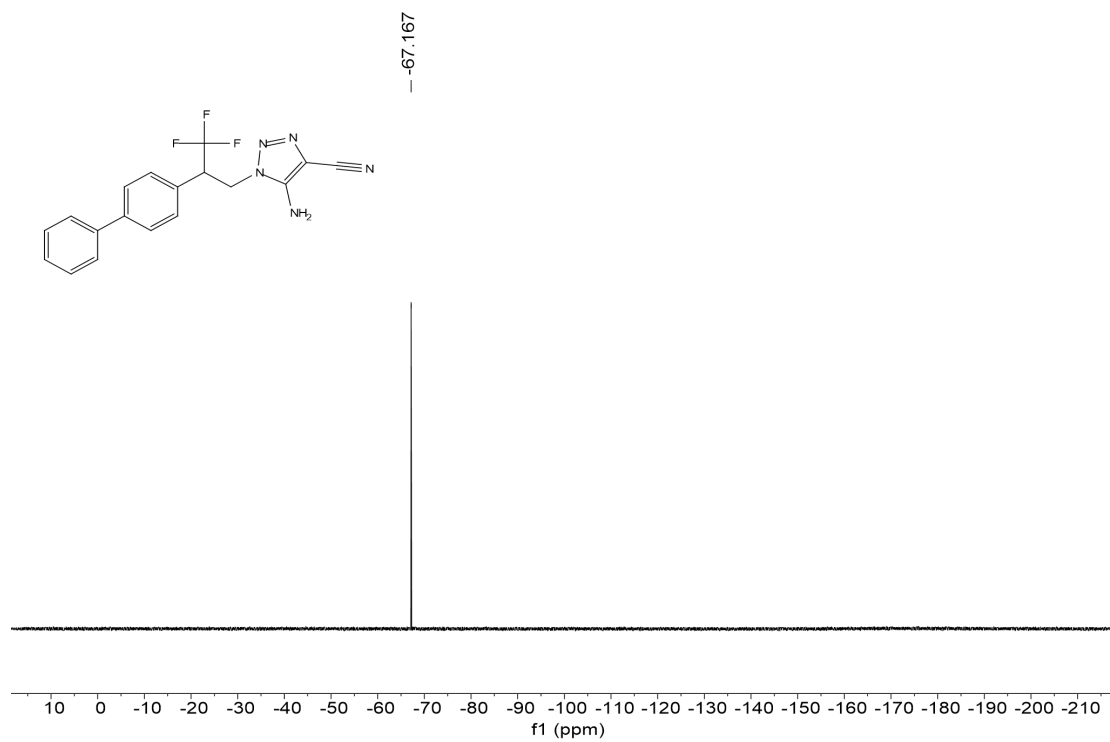

Supplement: d4cc02503b1.pdf [file d4cc02503b1.pdf]
